# Supplementary material for: iTRAQ-based comparative proteome analyses of different growth stages revealing the regulatory role of reactive oxygen species in the fruiting body development of Ophiocordyceps sinensis
Source: PeerJ. 2021 Mar 3;9:e10940. doi: 10.7717/peerj.10940 (PMC7936569; doi:10.7717/peerj.10940)
Supplement: Table S2 [file peerj-09-10940-s005.xlsx]

## Sheet: Sheet1
Table S2 differentially accumulated proteins （DAPs） in the comparisons between the different stages
Table S2-1. DAPs in the comparison of ST vs. PR
Protein	Description	Regulated-Stage	ST_1	ST_2	ST_3	ST_4	PR_1	PR_2	PR_3	PR_4	MF_1	MF_2	MF_3	MF_4	ST-vs-PR	ST-vs-PR-p	PR-vs-MF	PR-vs-MF-p	ST-vs-MF	ST-vs-MF-p	BP_GO_ID	BP_GO_Desc	BP_GO_Level	CC_GO_ID	CC_GO_Desc	CC_GO_Level	MF_GO_ID	MF_GO_Desc	MF_GO_Level	KEGG_KO	KEGG_Pathway_ID	KEGG_Pathway_Desc	Domain_ID	Domain_Desc	SubcellurLocation	COG_Gene	BlastScore	COG_Code	COG_Desc
T4ZYW5	Blastomyces-phase-specific protein OS=Ophiocordyceps sinensis (strain Co18 / CGMCC 3.14243) OX=911162 GN=OCS_05951 PE=4 SV=1	up	nan	3.836	4.32	nan	nan	0.221	0.22	nan	nan	0.262	0.225	nan	18.4945	0.00391261	0.90554	0.339887	16.7474	0.00398239													IPR006771;	Blastomyces yeast-phase-specific protein;	extracellular
T5A5L7	Uncharacterized protein OS=Ophiocordyceps sinensis (strain Co18 / CGMCC 3.14243) OX=911162 GN=OCS_03516 PE=4 SV=1	up	3.379	nan	3.84	nan	0.382	nan	0.194	nan	0.637	nan	nan	nan	12.5329	0.00556989	0.45212	nan	5.66641	nan															cytosol
T5ADX9	Glucosamine-6-phosphate isomerase OS=Ophiocordyceps sinensis (strain Co18 / CGMCC 3.14243) OX=911162 GN=OCS_03493 PE=3 SV=1	up	4.591	3.333	4.017	3.573	0.376	0.445	0.367	0.294	0.395	0.432	0.466	0.302	10.4679	1.5256e-05	0.92915	0.569366	9.72665	1.61678e-05	GO:0006044;GO:0046348;GO:0044237;GO:0006091;GO:1901575;GO:1901072;GO:0071704;GO:0009987;GO:0008150;GO:0008152;GO:0009056;GO:0044238;GO:0005975;GO:0006040;GO:0006041;GO:1901135;GO:0006043;GO:1901136;GO:1901071;	N-acetylglucosamine metabolic process;amino sugar catabolic process;cellular metabolic process;generation of precursor metabolites and energy;organic substance catabolic process;glucosamine-containing compound catabolic process;organic substance metabolic process;cellular process;biological_process;metabolic process;catabolic process;primary metabolic process;carbohydrate metabolic process;amino …	7;6;3;4;4;7;3;2;1;2;3;3;4;5;7;4;8;5;6;	GO:0043227;GO:0043226;GO:0005737;GO:0070062;GO:0043230;GO:1903561;GO:0031982;GO:0044464;GO:0005623;GO:0005622;GO:0005575;GO:0005576;GO:0044424;GO:0044421;	membrane-bounded organelle;organelle;cytoplasm;extracellular exosome;extracellular organelle;extracellular vesicle;vesicle;cell part;cell;intracellular;cellular_component;extracellular region;intracellular part;extracellular region part;	3;2;4;4;3;3;4;2;2;3;1;2;3;2;	GO:0003674;GO:0016861;GO:0016860;GO:0004342;GO:0019239;GO:0016787;GO:0003824;GO:0016853;	molecular_function;intramolecular oxidoreductase activity, interconverting aldoses and ketoses;intramolecular oxidoreductase activity;glucosamine-6-phosphate deaminase activity;deaminase activity;hydrolase activity;catalytic activity;isomerase activity;	1;5;4;4;3;3;2;3;	K02564	map00520;map01100;	Amino sugar and nucleotide sugar metabolism;Metabolic pathways;	IPR004547;IPR006148;IPR018321;	Glucosamine-6-phosphate isomerase;Glucosamine/galactosamine-6-phosphate isomerase;Glucosamine-6-phosphate isomerase, conserved site;	mitochondria	Hs13027378	368	G	[G] Carbohydrate transport and metabolism;
T5AFK0	Kazal domain-containing protein OS=Ophiocordyceps sinensis (strain Co18 / CGMCC 3.14243) OX=911162 GN=OCS_00066 PE=4 SV=1	up	4.236	3.138	nan	nan	0.408	0.43	nan	nan	0.557	0.523	nan	nan	8.79972	0.0270908	0.77593	0.0268796	6.82778	0.0291378															extracellular
T5ACS8	Chitinase OS=Ophiocordyceps sinensis (strain Co18 / CGMCC 3.14243) OX=911162 GN=OCS_03889 PE=3 SV=1	up	4.187	2.99	3.574	2.77	0.434	0.473	0.443	0.499	0.451	0.391	0.447	0.397	7.31261	9.48568e-05	1.09668	0.11036	8.01957	8.77879e-05	GO:0046348;GO:0006807;GO:0006022;GO:1901575;GO:0071704;GO:0006032;GO:0000272;GO:0008150;GO:0008152;GO:0006030;GO:1901564;GO:0009056;GO:0009057;GO:0051704;GO:0044238;GO:0005975;GO:1901565;GO:0005976;GO:1901136;GO:1901135;GO:0016052;GO:0043170;GO:0006040;GO:1901072;GO:0009405;GO:1901071;GO:0006026;	amino sugar catabolic process;nitrogen compound metabolic process;aminoglycan metabolic process;organic substance catabolic process;organic substance metabolic process;chitin catabolic process;polysaccharide catabolic process;biological_process;metabolic process;chitin metabolic process;organonitrogen compound metabolic process;catabolic process;macromolecule catabolic process;multi-organism proc…	6;3;5;4;3;7;6;1;2;6;4;3;5;2;3;4;5;5;5;4;5;4;5;7;3;6;6;	GO:0005575;GO:0005576;	cellular_component;extracellular region;	1;2;	GO:0016798;GO:0003674;GO:0005488;GO:0004568;GO:0016787;GO:0003824;GO:0097367;GO:0004553;GO:0008061;	hydrolase activity, acting on glycosyl bonds;molecular_function;binding;chitinase activity;hydrolase activity;catalytic activity;carbohydrate derivative binding;hydrolase activity, hydrolyzing O-glycosyl compounds;chitin binding;	4;1;2;6;3;2;3;5;4;	K01183	map00520;map01100;	Amino sugar and nucleotide sugar metabolism;Metabolic pathways;	IPR001579;IPR001223;IPR011583;IPR017853;IPR029070;	Glycoside hydrolase, chitinase active site;Glycoside hydrolase family 18, catalytic domain;Chitinase II;Glycoside hydrolase superfamily;Chitinase insertion domain;	extracellular	15613479	213	G	[G] Carbohydrate transport and metabolism;	COG3979	Chitodextrinase
T4ZZ45	QI74 protein OS=Ophiocordyceps sinensis (strain Co18 / CGMCC 3.14243) OX=911162 GN=OCS_05874 PE=4 SV=1	up	3.865	2.294	2.239	1.885	0.185	0.364	0.509	0.417	0.307	0.461	0.283	0.384	6.97156	0.00261332	1.02787	0.903663	7.16585	0.00245983															extracellular	Hs20544189_1	53.1	TW	[T] Signal transduction mechanisms;[W] Extracellular structures;
T5A8X3	Beta-hexosaminidase OS=Ophiocordyceps sinensis (strain Co18 / CGMCC 3.14243) OX=911162 GN=OCS_05243 PE=3 SV=1	up	4.672	3.312	2.64	2.402	0.324	0.393	0.662	0.524	0.4	0.387	0.447	0.525	6.8451	0.00166619	1.08186	0.672001	7.40534	0.00149182	GO:0071704;GO:0005975;GO:0044238;GO:0008152;GO:0008150;	organic substance metabolic process;carbohydrate metabolic process;primary metabolic process;metabolic process;biological_process;	3;4;3;2;1;	GO:0005575;GO:0005576;	cellular_component;extracellular region;	1;2;	GO:0016787;GO:0016798;GO:0015929;GO:0003824;GO:0004563;GO:0003674;GO:0004553;	hydrolase activity;hydrolase activity, acting on glycosyl bonds;hexosaminidase activity;catalytic activity;beta-N-acetylhexosaminidase activity;molecular_function;hydrolase activity, hydrolyzing O-glycosyl compounds;	3;4;6;2;7;1;5;	K12373	map00511;map00520;map00531;map00603;map00604;map01100;map04142;	Other glycan degradation;Amino sugar and nucleotide sugar metabolism;Glycosaminoglycan degradation;Glycosphingolipid biosynthesis - globo series;Glycosphingolipid biosynthesis - ganglio series;Metabolic pathways;Lysosome;	IPR029018;IPR029019;IPR015883;IPR017853;IPR025705;	Chitobiase/beta-hexosaminidase domain 2-like;Beta-hexosaminidase, eukaryotic type, N-terminal;Glycoside hydrolase family 20, catalytic domain;Glycoside hydrolase superfamily;Beta-hexosaminidase;	extracellular	At1g05590	273	G	[G] Carbohydrate transport and metabolism;
T5ACQ1	Glucan 1,3-beta-glucosidase GLUC78 OS=Ophiocordyceps sinensis (strain Co18 / CGMCC 3.14243) OX=911162 GN=OCS_04685 PE=4 SV=1	up	4.758	2.5	3.511	2.299	0.319	0.608	0.511	0.633	0.363	0.637	0.383	1.284	6.30994	0.00287539	0.77653	0.535054	4.89989	0.00502344				GO:0005575;GO:0005576;	cellular_component;extracellular region;	1;2;	GO:0015926;GO:0016787;GO:0016798;GO:0008422;GO:0003824;GO:0003674;GO:0004553;GO:0042973;	glucosidase activity;hydrolase activity;hydrolase activity, acting on glycosyl bonds;beta-glucosidase activity;catalytic activity;molecular_function;hydrolase activity, hydrolyzing O-glycosyl compounds;glucan endo-1,3-beta-D-glucosidase activity;	6;3;4;7;2;1;5;8;	K01210	map00500;	Starch and sucrose metabolism;	IPR011050;IPR024535;IPR012334;	Pectin lyase fold/virulence factor;Pectate lyase superfamily protein;Pectin lyase fold;	cytosol, nucleus	116621755	59.3	G	[G] Carbohydrate transport and metabolism;	COG5434	Polygalacturonase
T5AN73	Vacuolar protein sorting-associated protein OS=Ophiocordyceps sinensis (strain Co18 / CGMCC 3.14243) OX=911162 GN=OCS_01008 PE=3 SV=1	up	0.462	2.673	4.583	3.289	1.113	0.459	0.093	0.111	1.132	0.602	0.3	0.376	6.19771	0.0415589	0.73693	0.62017	4.56722	0.0505067	GO:0008104;GO:0034067;GO:0051649;GO:0045324;GO:0015031;GO:0051641;GO:0044699;GO:0070727;GO:0045053;GO:0006886;GO:0065007;GO:0071702;GO:0033036;GO:0034613;GO:0009987;GO:0032507;GO:0006810;GO:0051651;GO:0045184;GO:0033365;GO:0044765;GO:0008150;GO:1902582;GO:0051235;GO:0051234;GO:0051179;GO:1902578;GO:0016192;GO:0016197;GO:0046907;GO:0065008;GO:0007034;GO:0045185;GO:0044763;	protein localization;protein localization to Golgi apparatus;establishment of localization in cell;late endosome to vacuole transport;protein transport;cellular localization;single-organism process;cellular macromolecule localization;protein retention in Golgi apparatus;intracellular protein transport;biological regulation;organic substance transport;macromolecule localization;cellular protein lo…	4;7;4;8;5;3;2;4;6;6;2;5;3;5;2;5;4;4;4;6;4;1;5;3;3;2;3;5;7;5;3;6;4;3;	GO:0043229;GO:0043227;GO:0043226;GO:0005737;GO:0005773;GO:0005794;GO:0012505;GO:0043231;GO:0005829;GO:0044464;GO:0005623;GO:0005622;GO:0005575;GO:0044444;GO:0044424;GO:0005768;	intracellular organelle;membrane-bounded organelle;organelle;cytoplasm;vacuole;Golgi apparatus;endomembrane system;intracellular membrane-bounded organelle;cytosol;cell part;cell;intracellular;cellular_component;cytoplasmic part;intracellular part;endosome;	3;3;2;4;5;4;3;4;5;2;2;3;1;4;3;4;				K19525			IPR031642;IPR026847;IPR031646;IPR026854;IPR017148;IPR009543;IPR031645;	VPS13, repeated coiled region;Vacuolar protein sorting-associated protein 13;Vacuolar protein sorting-associated protein 13, second N-terminal domain;Vacuolar protein sorting-associated protein 13, N-terminal domain;Vacuolar protein sorting-associated protein 13, fungi;Vacuolar protein sorting-associated protein 13, SHR-binding domain;Vacuolar protein sorting-associated protein 13, C-terminal;	cytosol	YLL040c	1818	U	[U] Intracellular trafficking, secretion, and vesicular transport;
T5AB96	Glycoside hydrolase family 2 OS=Ophiocordyceps sinensis (strain Co18 / CGMCC 3.14243) OX=911162 GN=OCS_04429 PE=4 SV=1	up	4.179	3.058	3.301	1.945	0.358	0.504	0.538	0.689	0.618	0.503	0.444	0.856	5.9755	0.00139512	0.86287	0.492535	5.15613	0.00172011													IPR013783;IPR017853;IPR008979;IPR006104;IPR006103;IPR006102;	Immunoglobulin-like fold;Glycoside hydrolase superfamily;Galactose-binding domain-like;Glycosyl hydrolases family 2, sugar binding domain;Glycoside hydrolase family 2, catalytic domain;Glycoside hydrolase, family 2, immunoglobulin-like beta-sandwich;	extracellular	384146458	445	G	[G] Carbohydrate transport and metabolism;	COG3250	Beta-galactosidase/beta-glucuronidase
T5AAG4	CAP domain protein OS=Ophiocordyceps sinensis (strain Co18 / CGMCC 3.14243) OX=911162 GN=OCS_01812 PE=3 SV=1	up	3.011	2.877	2.969	2.191	0.474	0.435	0.445	0.506	0.645	0.453	0.527	0.699	5.93965	2.13253e-05	0.80034	0.0924707	4.75387	3.55736e-05				GO:0043230;GO:0070062;GO:0044421;GO:0005575;GO:0005576;GO:1903561;GO:0043227;GO:0043226;GO:0031982;	extracellular organelle;extracellular exosome;extracellular region part;cellular_component;extracellular region;extracellular vesicle;membrane-bounded organelle;organelle;vesicle;	3;4;2;1;2;3;3;2;4;	GO:0098772;GO:0030234;GO:0061134;GO:0003674;GO:0030414;GO:0004857;	molecular function regulator;enzyme regulator activity;peptidase regulator activity;molecular_function;peptidase inhibitor activity;enzyme inhibitor activity;	2;3;4;1;5;4;				IPR001283;IPR018244;IPR014044;	Cysteine-rich secretory protein, allergen V5/Tpx-1-related;Allergen V5/Tpx-1-related, conserved site;CAP domain;	mitochondria	At5g26130	82	S	[S] Function unknown;
T5ADP3	Cwl1 OS=Ophiocordyceps sinensis (strain Co18 / CGMCC 3.14243) OX=911162 GN=OCS_00697 PE=4 SV=1	up	2.966	nan	2.383	nan	0.428	nan	0.514	nan	0.974	nan	0.565	nan	5.67827	0.0174156	0.61209	0.289368	3.47563	0.0332079													IPR003388;	Reticulon;	extracellular
T5APH5	Uncharacterized protein OS=Ophiocordyceps sinensis (strain Co18 / CGMCC 3.14243) OX=911162 GN=OCS_00558 PE=4 SV=1	up	3.675	2.167	1.835	1.916	0.296	0.453	0.412	0.562	0.718	0.908	1.023	0.801	5.56762	0.00400024	0.49942	0.00240132	2.78058	0.012538															extracellular
T5ANG8	Ribosomal protein S8 OS=Ophiocordyceps sinensis (strain Co18 / CGMCC 3.14243) OX=911162 GN=OCS_00919 PE=3 SV=1	up	3.118	2.905	3.016	2.189	0.641	0.508	0.456	0.547	0.658	0.441	0.574	0.614	5.21757	4.1594e-05	0.94097	0.600013	4.90949	4.72373e-05	GO:1901564;GO:0044249;GO:0006807;GO:0044237;GO:0034645;GO:1901576;GO:0044260;GO:0043043;GO:0071704;GO:0010467;GO:1901566;GO:0043170;GO:0044267;GO:0009987;GO:0009058;GO:0009059;GO:0008150;GO:0008152;GO:0044271;GO:0043604;GO:0044238;GO:0019538;GO:0034641;GO:0043603;GO:0006518;GO:0006412;	organonitrogen compound metabolic process;cellular biosynthetic process;nitrogen compound metabolic process;cellular metabolic process;cellular macromolecule biosynthetic process;organic substance biosynthetic process;cellular macromolecule metabolic process;peptide biosynthetic process;organic substance metabolic process;gene expression;organonitrogen compound biosynthetic process;macromolecule …	4;4;3;3;5;4;4;6;3;5;5;4;5;2;3;5;1;2;5;6;3;4;4;5;5;6;	GO:0044464;GO:0043229;GO:0030529;GO:0043226;GO:0005737;GO:0032991;GO:0005840;GO:0043232;GO:1990904;GO:0005623;GO:0005622;GO:0005575;GO:0044444;GO:0043228;GO:0044424;	cell part;intracellular organelle;intracellular ribonucleoprotein complex;organelle;cytoplasm;macromolecular complex;ribosome;intracellular non-membrane-bounded organelle;ribonucleoprotein complex;cell;intracellular;cellular_component;cytoplasmic part;non-membrane-bounded organelle;intracellular part;	2;3;4;2;4;2;5;4;3;2;3;1;4;3;3;	GO:0003674;GO:0005198;GO:0003735;	molecular_function;structural molecule activity;structural constituent of ribosome;	1;2;3;	K02957	map03010;	Ribosome;	IPR000630;	Ribosomal protein S8;	cytosol	YJL190c	236	J	[J] Translation, ribosomal structure and biogenesis;
T5AEZ7	Uncharacterized protein OS=Ophiocordyceps sinensis (strain Co18 / CGMCC 3.14243) OX=911162 GN=OCS_03147 PE=4 SV=1	up	2.5	2.343	3.803	2.236	0.739	0.575	0.325	0.463	0.995	0.749	0.652	0.756	5.17706	0.00110177	0.66688	0.0609279	3.45241	0.00202778															plasma membrane
T5ABA6	Stress responsive A/B barrel domain-containing protein OS=Ophiocordyceps sinensis (strain Co18 / CGMCC 3.14243) OX=911162 GN=OCS_01560 PE=4 SV=1	up	2.398	nan	1.7	nan	0.332	nan	0.509	nan	0.529	nan	0.718	nan	4.87282	0.0455661	0.67442	0.257431	3.28629	0.0587247													IPR013097;IPR011008;	Stress responsive alpha-beta barrel;Dimeric alpha-beta barrel;	mitochondria
T5AE63	Glycoside hydrolase, family 3 OS=Ophiocordyceps sinensis (strain Co18 / CGMCC 3.14243) OX=911162 GN=OCS_03408 PE=4 SV=1	up	3.193	2.146	2.508	2.052	0.533	0.568	0.536	0.476	0.733	0.682	0.526	0.631	4.68472	0.000290452	0.82154	0.0546131	3.84876	0.000431255	GO:0030243;GO:0044042;GO:0030245;GO:0044248;GO:0009251;GO:0044247;GO:0044264;GO:0044262;GO:0044260;GO:0071704;GO:0006073;GO:0051273;GO:0009987;GO:1901575;GO:0000272;GO:0008150;GO:0008152;GO:0009056;GO:0009057;GO:0044275;GO:0044238;GO:0005975;GO:0051275;GO:0005976;GO:0016052;GO:0044237;GO:0043170;	cellulose metabolic process;glucan metabolic process;cellulose catabolic process;cellular catabolic process;glucan catabolic process;cellular polysaccharide catabolic process;cellular polysaccharide metabolic process;cellular carbohydrate metabolic process;cellular macromolecule metabolic process;organic substance metabolic process;cellular glucan metabolic process;beta-glucan metabolic process;c…	8;6;8;4;7;6;5;4;4;3;6;7;2;4;6;1;2;3;5;5;3;4;7;5;5;3;4;	GO:0005575;GO:0005576;	cellular_component;extracellular region;	1;2;	GO:0015926;GO:0003674;GO:0008422;GO:0003824;GO:0016787;GO:0004553;GO:0016798;	glucosidase activity;molecular_function;beta-glucosidase activity;catalytic activity;hydrolase activity;hydrolase activity, hydrolyzing O-glycosyl compounds;hydrolase activity, acting on glycosyl bonds;	6;1;7;2;3;5;4;	K05349	map00460;map00500;map00940;map01100;map01110;	Cyanoamino acid metabolism;Starch and sucrose metabolism;Phenylpropanoid biosynthesis;Metabolic pathways;Biosynthesis of secondary metabolites;	IPR002772;IPR013783;IPR001764;IPR026891;IPR017853;	Glycoside hydrolase family 3 C-terminal domain;Immunoglobulin-like fold;Glycoside hydrolase, family 3, N-terminal;Fibronectin type III-like domain;Glycoside hydrolase superfamily;	cytosol	271967420	312	G	[G] Carbohydrate transport and metabolism;	COG1472	Periplasmic beta-glucosidase and related glycosidases
T5ACS6	Uncharacterized protein OS=Ophiocordyceps sinensis (strain Co18 / CGMCC 3.14243) OX=911162 GN=OCS_01025 PE=4 SV=1	up	3.092	3.175	2.347	1.87	0.357	0.554	0.685	0.702	0.713	0.536	0.635	0.888	4.56225	0.000711282	0.829	0.318792	3.78211	0.000954782															extracellular
T5ADX7	PAN domain containing protein OS=Ophiocordyceps sinensis (strain Co18 / CGMCC 3.14243) OX=911162 GN=OCS_00649 PE=4 SV=1	up	2.961	1.848	3.011	1.738	0.432	0.71	0.298	0.69	0.713	1.062	0.423	0.611	4.48732	0.00208713	0.75828	0.350341	3.40263	0.00387067													IPR003609;	PAN/Apple domain;	extracellular
T5A6P2	Beta-hexosaminidase OS=Ophiocordyceps sinensis (strain Co18 / CGMCC 3.14243) OX=911162 GN=OCS_03165 PE=3 SV=1	up	2.315	2.29	3.396	1.99	0.565	0.621	0.446	0.644	1.087	0.859	0.555	0.792	4.38962	0.000817782	0.69116	0.0747327	3.03401	0.00218442	GO:0071704;GO:0005975;GO:0044238;GO:0008152;GO:0008150;	organic substance metabolic process;carbohydrate metabolic process;primary metabolic process;metabolic process;biological_process;	3;4;3;2;1;				GO:0016787;GO:0016798;GO:0015929;GO:0003824;GO:0004563;GO:0003674;GO:0004553;	hydrolase activity;hydrolase activity, acting on glycosyl bonds;hexosaminidase activity;catalytic activity;beta-N-acetylhexosaminidase activity;molecular_function;hydrolase activity, hydrolyzing O-glycosyl compounds;	3;4;6;2;7;1;5;	K12373	map00511;map00520;map00531;map00603;map00604;map01100;map04142;	Other glycan degradation;Amino sugar and nucleotide sugar metabolism;Glycosaminoglycan degradation;Glycosphingolipid biosynthesis - globo series;Glycosphingolipid biosynthesis - ganglio series;Metabolic pathways;Lysosome;	IPR029018;IPR025705;IPR015883;IPR017853;IPR029019;	Chitobiase/beta-hexosaminidase domain 2-like;Beta-hexosaminidase;Glycoside hydrolase family 20, catalytic domain;Glycoside hydrolase superfamily;Beta-hexosaminidase, eukaryotic type, N-terminal;	extracellular	At1g05590	360	G	[G] Carbohydrate transport and metabolism;
T5AN13	Uncharacterized protein OS=Ophiocordyceps sinensis (strain Co18 / CGMCC 3.14243) OX=911162 GN=OCS_01086 PE=4 SV=1	up	nan	nan	2.756	1.967	nan	nan	0.471	0.605	nan	nan	0.38	0.609	4.38943	0.0449333	1.08797	0.774131	4.77553	0.0451558															mitochondria
T5AGP8	Elicitor protein OS=Ophiocordyceps sinensis (strain Co18 / CGMCC 3.14243) OX=911162 GN=OCS_03287 PE=4 SV=1	up	2.884	2.333	2.865	1.68	0.582	0.51	0.49	0.671	0.559	0.538	0.406	0.527	4.33294	0.000607975	1.10985	0.338065	4.80887	0.000511247										K13199			IPR019084;	Stm1-like, N-terminal;	mitochondria
T5A6I4	FMN-binding split barrel-related protein OS=Ophiocordyceps sinensis (strain Co18 / CGMCC 3.14243) OX=911162 GN=OCS_06860 PE=4 SV=1	up	2.646	2.269	3.023	1.866	0.594	0.546	0.522	0.673	0.655	0.766	0.628	0.801	4.19868	0.000301473	0.8193	0.0530811	3.44	0.000457679													IPR012349;	FMN-binding split barrel;	mitochondria
T5AB64	DNA damage-inducible protein 1 OS=Ophiocordyceps sinensis (strain Co18 / CGMCC 3.14243) OX=911162 GN=OCS_01598 PE=4 SV=1	up	1.967	1.361	4.029	1.527	0.552	0.84	0.002	0.752	1.013	1.142	nan	0.8	4.13976	0.0398477	0.54467	0.117792	2.25482	0.152885	GO:0008104;GO:0071702;GO:0033036;GO:0006810;GO:0045184;GO:0008150;GO:0051234;GO:0051179;GO:0015031;	protein localization;organic substance transport;macromolecule localization;transport;establishment of protein localization;biological_process;establishment of localization;localization;protein transport;	4;5;3;4;4;1;3;2;5;	GO:0044424;GO:0005737;GO:0044464;GO:0005623;GO:0005622;GO:0005575;	intracellular part;cytoplasm;cell part;cell;intracellular;cellular_component;	3;4;2;2;3;1;	GO:0004175;GO:0003674;GO:0008233;GO:0070001;GO:0016787;GO:0003824;GO:0070011;GO:0004190;	endopeptidase activity;molecular_function;peptidase activity;aspartic-type peptidase activity;hydrolase activity;catalytic activity;peptidase activity, acting on L-amino acid peptides;aspartic-type endopeptidase activity;	6;1;4;6;3;2;5;7;	K11885			IPR009060;IPR021109;IPR000626;IPR029071;IPR015940;IPR019103;IPR033322;IPR001995;	UBA-like;Aspartic peptidase domain;Ubiquitin domain;Ubiquitin-related domain;Ubiquitin-associated domain;Aspartic peptidase, DDI1-type;DNA damage-inducible protein 1;Peptidase A2A, retrovirus, catalytic;	mitochondria	SPAC56F8.07	269	L	[L] Replication, recombination and repair;
T5AEI8	Glycoside hydrolase family 17 protein OS=Ophiocordyceps sinensis (strain Co18 / CGMCC 3.14243) OX=911162 GN=OCS_04041 PE=3 SV=1	up	3.583	2.533	2.026	1.869	0.506	0.522	0.628	0.773	0.58	0.615	0.641	0.629	4.1215	0.00288733	0.9854	0.89095	4.06126	0.00278747	GO:0045229;GO:0071840;GO:1901575;GO:0071555;GO:0016043;GO:0071554;GO:0071704;GO:0009987;GO:0000272;GO:0008150;GO:0008152;GO:0009056;GO:0009057;GO:0044238;GO:0005975;GO:0005976;GO:0016052;GO:0043170;	external encapsulating structure organization;cellular component organization or biogenesis;organic substance catabolic process;cell wall organization;cellular component organization;cell wall organization or biogenesis;organic substance metabolic process;cellular process;polysaccharide catabolic process;biological_process;metabolic process;catabolic process;macromolecule catabolic process;primar…	4;2;4;4;3;3;3;2;6;1;2;3;5;3;4;5;5;4;	GO:0044464;GO:0071944;GO:0031225;GO:0005618;GO:0016020;GO:0031224;GO:0005886;GO:0030312;GO:0005623;GO:0005575;GO:0005576;GO:0044425;	cell part;cell periphery;anchored component of membrane;cell wall;membrane;intrinsic component of membrane;plasma membrane;external encapsulating structure;cell;cellular_component;extracellular region;membrane part;	2;3;4;4;2;3;3;3;2;1;2;2;	GO:0003674;GO:0016787;GO:0016798;GO:0008422;GO:0015926;GO:0003824;GO:0004553;GO:0042973;	molecular_function;hydrolase activity;hydrolase activity, acting on glycosyl bonds;beta-glucosidase activity;glucosidase activity;catalytic activity;hydrolase activity, hydrolyzing O-glycosyl compounds;glucan endo-1,3-beta-D-glucosidase activity;	1;3;4;7;6;2;5;8;	K01199	map00500;	Starch and sucrose metabolism;	IPR017853;	Glycoside hydrolase superfamily;	extracellular	407450829	67.8	G	[G] Carbohydrate transport and metabolism;	COG5309	Exo-beta-1,3-glucanase, GH17 family
T5AFJ6	Pre-mRNA-splicing factor rse-1 OS=Ophiocordyceps sinensis (strain Co18 / CGMCC 3.14243) OX=911162 GN=OCS_02928 PE=4 SV=1	up	2.594	nan	2.678	nan	0.746	nan	0.565	nan	0.772	nan	0.544	nan	4.02139	0.00252819	0.9962	0.987856	4.00608	0.00375132	GO:0090304;GO:0034641;GO:0006807;GO:1901360;GO:0006139;GO:0044260;GO:0071704;GO:0010467;GO:0008380;GO:0016071;GO:0009987;GO:0006725;GO:0008150;GO:0008152;GO:0046483;GO:0016070;GO:0044238;GO:0044237;GO:0043170;GO:0006396;GO:0006397;	nucleic acid metabolic process;cellular nitrogen compound metabolic process;nitrogen compound metabolic process;organic cyclic compound metabolic process;nucleobase-containing compound metabolic process;cellular macromolecule metabolic process;organic substance metabolic process;gene expression;RNA splicing;mRNA metabolic process;cellular process;cellular aromatic compound metabolic process;biolo…	5;4;3;4;4;4;3;5;7;6;2;4;1;2;4;5;3;3;4;6;7;	GO:1990904;GO:0005681;GO:0005622;GO:0043227;GO:0005623;GO:0005634;GO:0030529;GO:0005575;GO:0032991;GO:0043231;GO:0044464;GO:0043229;GO:0044446;GO:0044428;GO:0044422;GO:0043226;GO:0044424;	ribonucleoprotein complex;spliceosomal complex;intracellular;membrane-bounded organelle;cell;nucleus;intracellular ribonucleoprotein complex;cellular_component;macromolecular complex;intracellular membrane-bounded organelle;cell part;intracellular organelle;intracellular organelle part;nuclear part;organelle part;organelle;intracellular part;	3;5;3;3;2;5;4;1;2;4;2;3;3;4;2;2;3;	GO:0003674;GO:0005488;GO:0003676;GO:1901363;GO:0097159;	molecular_function;binding;nucleic acid binding;heterocyclic compound binding;organic cyclic compound binding;	1;2;4;3;3;	K12830	map03040;	Spliceosome;	IPR015943;IPR004871;IPR017986;	WD40/YVTN repeat-like-containing domain;Cleavage/polyadenylation specificity factor, A subunit, C-terminal;WD40-repeat-containing domain;	plasma membrane	Hs11034823	1134	A	[A] RNA processing and modification;
T5A7H8	Carbohydrate-binding WSC OS=Ophiocordyceps sinensis (strain Co18 / CGMCC 3.14243) OX=911162 GN=OCS_05740 PE=4 SV=1	up	3.975	1.897	2.196	2.281	0.382	0.839	0.845	0.671	0.604	0.798	0.612	0.525	3.78115	0.00756971	1.07798	0.701252	4.07601	0.00618569				GO:0005575;GO:0005576;	cellular_component;extracellular region;	1;2;							IPR002889;	Carbohydrate-binding WSC;	nucleus	Hs14755576	73.9	GO	[G] Carbohydrate transport and metabolism;[O] Posttranslational modification, protein turnover, chaperones;
T5AKV5	Glycoside hydrolase, family 31 OS=Ophiocordyceps sinensis (strain Co18 / CGMCC 3.14243) OX=911162 GN=OCS_01832 PE=3 SV=1	up	3.259	2.088	2.404	1.415	0.473	0.598	0.62	0.737	0.711	0.788	0.75	0.985	3.77515	0.00478472	0.75077	0.0481992	2.83426	0.0086993													IPR000322;IPR017853;	Glycoside hydrolase family 31;Glycoside hydrolase superfamily;	nucleus	258654867	652	G	[G] Carbohydrate transport and metabolism;	COG1501	Alpha-glucosidase, glycosyl hydrolase family GH31
T5A3K5	Casein kinase I isoform epsilon OS=Ophiocordyceps sinensis (strain Co18 / CGMCC 3.14243) OX=911162 GN=OCS_04249 PE=3 SV=1	up	2.664	2.586	2.358	1.934	0.629	0.563	0.712	0.634	0.546	0.487	0.509	0.647	3.75968	4.37512e-05	1.15943	0.111065	4.35907	3.42179e-05	GO:0080090;GO:0019222;GO:0048583;GO:0007165;GO:1901360;GO:0051716;GO:0000003;GO:0071704;GO:0045132;GO:0018212;GO:0018210;GO:0006282;GO:0051052;GO:0006281;GO:0060255;GO:2001020;GO:0046483;GO:0044700;GO:0044702;GO:0018209;GO:0019538;GO:0033554;GO:0006807;GO:0043170;GO:0050789;GO:0044267;GO:0044260;GO:0016043;GO:0065007;GO:0071840;GO:1990443;GO:0044710;GO:0050794;GO:0043412;GO:0036211;GO:0008150;GO:…	regulation of primary metabolic process;regulation of metabolic process;regulation of response to stimulus;signal transduction;organic cyclic compound metabolic process;cellular response to stimulus;reproduction;organic substance metabolic process;meiotic chromosome segregation;peptidyl-tyrosine modification;peptidyl-threonine modification;regulation of DNA repair;regulation of DNA metabolic proc…	4;3;3;4;4;3;2;3;5;8;8;5;5;4;4;5;4;3;3;8;4;4;3;4;2;5;4;3;2;2;9;3;3;5;5;1;2;4;4;4;3;6;4;2;7;8;2;9;4;4;5;3;9;6;2;4;5;6;4;5;2;8;8;4;8;4;5;4;4;7;5;6;2;3;4;4;4;3;3;5;5;4;5;	GO:0032153;GO:0043231;GO:0005829;GO:0044424;GO:0043229;GO:0043227;GO:0005737;GO:0044444;GO:0005634;GO:0044464;GO:0005623;GO:0005622;GO:0043226;GO:0005575;	cell division site;intracellular membrane-bounded organelle;cytosol;intracellular part;intracellular organelle;membrane-bounded organelle;cytoplasm;cytoplasmic part;nucleus;cell part;cell;intracellular;organelle;cellular_component;	3;4;5;3;3;3;4;4;5;2;2;3;2;1;	GO:1901363;GO:0000166;GO:0016740;GO:0004713;GO:0097367;GO:0003674;GO:0005488;GO:1901265;GO:0032549;GO:0017076;GO:0005524;GO:0016301;GO:0003824;GO:0016773;GO:0016772;GO:0032559;GO:0032555;GO:0032550;GO:0032553;GO:0035639;GO:0043167;GO:0030554;GO:0097159;GO:0001883;GO:0001882;GO:0004674;GO:0004672;GO:0036094;GO:0043168;	heterocyclic compound binding;nucleotide binding;transferase activity;protein tyrosine kinase activity;carbohydrate derivative binding;molecular_function;binding;nucleoside phosphate binding;ribonucleoside binding;purine nucleotide binding;ATP binding;kinase activity;catalytic activity;phosphotransferase activity, alcohol group as acceptor;transferase activity, transferring phosphorus-containing …	3;4;3;7;3;1;2;4;5;5;6;5;2;5;4;6;5;6;4;5;3;6;3;5;4;7;6;3;4;	K14758	map03008;	Ribosome biogenesis in eukaryotes;	IPR017441;IPR008271;IPR011009;IPR000719;	Protein kinase, ATP binding site;Serine/threonine-protein kinase, active site;Protein kinase-like domain;Protein kinase domain;	cytosol	SPBC3H7.15	521	T	[T] Signal transduction mechanisms;
T5AD06	Aspartyl aminopeptidase OS=Ophiocordyceps sinensis (strain Co18 / CGMCC 3.14243) OX=911162 GN=OCS_03999 PE=3 SV=1	up	2.583	2.079	2.853	2.035	0.644	0.738	0.534	0.7	0.821	0.708	0.482	0.624	3.65057	0.000144241	0.99279	0.956792	3.62429	0.000179394	GO:0006457;GO:0009987;GO:0008150;GO:0061077;	protein folding;cellular process;biological_process;chaperone-mediated protein folding;	3;2;1;4;	GO:0000324;GO:0000323;GO:0000322;GO:0044464;GO:0031974;GO:0000328;GO:0043229;GO:0043228;GO:0043227;GO:0043226;GO:0005737;GO:0044446;GO:0005773;GO:0005775;GO:0030529;GO:0044437;GO:0043231;GO:0032991;GO:0005840;GO:0043232;GO:0043233;GO:0005829;GO:1990904;GO:0005623;GO:0005622;GO:0005575;GO:0070013;GO:0044444;GO:0044424;GO:0044422;	fungal-type vacuole;lytic vacuole;storage vacuole;cell part;membrane-enclosed lumen;fungal-type vacuole lumen;intracellular organelle;non-membrane-bounded organelle;membrane-bounded organelle;organelle;cytoplasm;intracellular organelle part;vacuole;vacuolar lumen;intracellular ribonucleoprotein complex;vacuolar part;intracellular membrane-bounded organelle;macromolecular complex;ribosome;intracel…	7;6;6;2;2;6;3;3;3;2;4;3;5;5;4;4;4;2;5;4;3;5;3;2;3;1;4;4;3;2;	GO:0004177;GO:0008238;GO:0003674;GO:0005488;GO:0008233;GO:0043167;GO:0008237;GO:0046914;GO:0008235;GO:0070006;GO:0046872;GO:0016787;GO:0043169;GO:0003824;GO:0070011;GO:0008270;	aminopeptidase activity;exopeptidase activity;molecular_function;binding;peptidase activity;ion binding;metallopeptidase activity;transition metal ion binding;metalloexopeptidase activity;metalloaminopeptidase activity;metal ion binding;hydrolase activity;cation binding;catalytic activity;peptidase activity, acting on L-amino acid peptides;zinc ion binding;	7;6;1;2;4;3;6;6;7;8;5;3;4;2;5;7;	K01267			IPR001948;	Peptidase M18;	cytosol	SPAC4F10.02	387	E	[E] Amino acid transport and metabolism;
T5AAS6	Zinc finger domain-containing protein OS=Ophiocordyceps sinensis (strain Co18 / CGMCC 3.14243) OX=911162 GN=OCS_05443 PE=4 SV=1	up	2.472	2.121	nan	nan	0.604	0.661	nan	nan	0.779	0.632	nan	nan	3.63082	0.0112251	0.89653	0.452195	3.25514	0.0140024	GO:0019953;GO:0050789;GO:0044699;GO:0022414;GO:0044703;GO:0065007;GO:0007276;GO:0051704;GO:0042127;GO:0032501;GO:0048609;GO:0032504;GO:0008283;GO:0009987;GO:0050794;GO:0008150;GO:0000003;GO:0044702;	sexual reproduction;regulation of biological process;single-organism process;reproductive process;multi-organism reproductive process;biological regulation;gamete generation;multi-organism process;regulation of cell proliferation;multicellular organismal process;multicellular organismal reproductive process;multicellular organism reproduction;cell proliferation;cellular process;regulation of cell…	3;2;2;2;3;2;4;2;4;2;3;3;3;2;3;1;2;3;	GO:0035770;GO:0044464;GO:0043229;GO:0043228;GO:0036464;GO:0043226;GO:0005737;GO:0043186;GO:0030529;GO:0032991;GO:0043232;GO:0060293;GO:1990904;GO:0005623;GO:0005622;GO:0005575;GO:0044444;GO:0044424;GO:0045495;	ribonucleoprotein granule;cell part;intracellular organelle;non-membrane-bounded organelle;cytoplasmic ribonucleoprotein granule;organelle;cytoplasm;P granule;intracellular ribonucleoprotein complex;macromolecular complex;intracellular non-membrane-bounded organelle;germ plasm;ribonucleoprotein complex;cell;intracellular;cellular_component;cytoplasmic part;intracellular part;pole plasm;	5;2;3;3;5;2;4;6;4;2;4;6;3;2;3;1;4;3;5;	GO:0035639;GO:1901363;GO:0019899;GO:0003674;GO:0003676;GO:0001883;GO:0043167;GO:0001882;GO:0043169;GO:0046914;GO:0008270;GO:0003724;GO:0036094;GO:0032549;GO:0017076;GO:0005524;GO:0016787;GO:0000166;GO:0017111;GO:1901265;GO:0019901;GO:0019900;GO:0004386;GO:0046872;GO:0032555;GO:0008432;GO:0016818;GO:0003824;GO:0097367;GO:0097159;GO:0030554;GO:0016817;GO:0016462;GO:0032550;GO:0032559;GO:0003723;GO:…	purine ribonucleoside triphosphate binding;heterocyclic compound binding;enzyme binding;molecular_function;nucleic acid binding;purine nucleoside binding;ion binding;nucleoside binding;cation binding;transition metal ion binding;zinc ion binding;RNA helicase activity;small molecule binding;ribonucleoside binding;purine nucleotide binding;ATP binding;hydrolase activity;nucleotide binding;nucleosid…	5;3;4;1;4;5;3;4;4;6;7;9;3;5;5;6;3;4;7;4;6;5;8;5;5;7;5;2;3;3;6;4;6;6;6;5;3;4;4;2;				IPR025836;IPR002048;IPR001878;	Zinc knuckle CX2CX4HX4C;EF-hand domain;Zinc finger, CCHC-type;	cytosol, nucleus	CE29052	111	A	[A] RNA processing and modification;
T5A2L2	Uncharacterized protein OS=Ophiocordyceps sinensis (strain Co18 / CGMCC 3.14243) OX=911162 GN=OCS_04636 PE=4 SV=1	up	nan	2.01	nan	2.133	nan	0.656	nan	0.499	nan	0.725	nan	1.001	3.58706	0.00442579	0.66918	0.213957	2.40035	0.0152722															mitochondria
T5AG46	Lcc2 OS=Ophiocordyceps sinensis (strain Co18 / CGMCC 3.14243) OX=911162 GN=OCS_02888 PE=3 SV=1	up	2.061	1.641	2.727	1.736	0.578	0.68	0.456	0.605	0.857	0.784	0.515	0.783	3.52088	0.00110514	0.78904	0.130446	2.77816	0.00225327				GO:0005575;GO:0005576;	cellular_component;extracellular region;	1;2;	GO:0043169;GO:0005507;GO:0046914;GO:0043167;GO:0003824;GO:0052716;GO:0003674;GO:0005488;GO:0016679;GO:0046872;GO:0016682;GO:0016491;	cation binding;copper ion binding;transition metal ion binding;ion binding;catalytic activity;hydroquinone:oxygen oxidoreductase activity;molecular_function;binding;oxidoreductase activity, acting on diphenols and related substances as donors;metal ion binding;oxidoreductase activity, acting on diphenols and related substances as donors, oxygen as acceptor;oxidoreductase activity;	4;7;6;3;2;6;1;2;4;5;5;3;				IPR011707;IPR011706;IPR001117;IPR033138;IPR008972;IPR002355;	Multicopper oxidase, type 3;Multicopper oxidase, type 2;Multicopper oxidase, type 1;Multicopper oxidases, conserved site;Cupredoxin;Multicopper oxidase, copper-binding site;	extracellular	At2g29130	164	Q	[Q] Secondary metabolites biosynthesis, transport and catabolism;
T5A274	Chitin synthase OS=Ophiocordyceps sinensis (strain Co18 / CGMCC 3.14243) OX=911162 GN=OCS_04763 PE=3 SV=1	up	2.465	2.202	nan	nan	0.669	0.665	nan	nan	0.706	0.582	nan	nan	3.49846	0.00617031	1.03571	0.746394	3.62345	0.00732353	GO:0046349;GO:0006807;GO:0045229;GO:0044699;GO:1901576;GO:0044710;GO:0044711;GO:0071555;GO:0016043;GO:0071554;GO:0071704;GO:0071840;GO:0006031;GO:0006030;GO:0009987;GO:0009058;GO:0009059;GO:0008150;GO:0008152;GO:0006023;GO:1901564;GO:1901566;GO:1901137;GO:1901135;GO:0043170;GO:0006040;GO:0006022;GO:1901073;GO:1901071;	amino sugar biosynthetic process;nitrogen compound metabolic process;external encapsulating structure organization;single-organism process;organic substance biosynthetic process;single-organism metabolic process;single-organism biosynthetic process;cell wall organization;cellular component organization;cell wall organization or biogenesis;organic substance metabolic process;cellular component org…	6;3;4;2;4;3;4;4;3;3;3;2;6;6;2;3;5;1;2;5;4;5;5;4;4;5;5;7;6;	GO:0005886;GO:0031224;GO:0016021;GO:0016020;GO:0044425;GO:0044464;GO:0005623;GO:0005575;GO:0071944;	plasma membrane;intrinsic component of membrane;integral component of membrane;membrane;membrane part;cell part;cell;cellular_component;cell periphery;	3;3;4;2;2;2;2;1;3;	GO:0003674;GO:0008375;GO:0016740;GO:0004100;GO:0003824;GO:0008194;GO:0016757;GO:0016758;	molecular_function;acetylglucosaminyltransferase activity;transferase activity;chitin synthase activity;catalytic activity;UDP-glycosyltransferase activity;transferase activity, transferring glycosyl groups;transferase activity, transferring hexosyl groups;	1;6;3;7;2;5;4;5;	K00698	map00520;	Amino sugar and nucleotide sugar metabolism;	IPR013616;IPR029044;IPR004835;IPR004834;	Chitin synthase N-terminal;Nucleotide-diphospho-sugar transferases;Chitin synthase;Fungal chitin synthase;	plasma membrane	SPAC13G6.12c	578	M	[M] Cell wall/membrane/envelope biogenesis;
T4ZY22	Uncharacterized protein OS=Ophiocordyceps sinensis (strain Co18 / CGMCC 3.14243) OX=911162 GN=OCS_06248 PE=4 SV=1	up	1.959	1.871	2.235	2.018	0.666	0.528	0.523	0.618	0.826	0.669	0.401	0.59	3.46164	2.75499e-06	0.93926	0.705008	3.25141	2.12876e-05															nucleus
T4ZYY1	Signal peptidase complex catalytic subunit SEC11 OS=Ophiocordyceps sinensis (strain Co18 / CGMCC 3.14243) OX=911162 GN=OCS_05934 PE=3 SV=1	up	2.862	2.293	nan	nan	0.694	0.718	0.86	nan	0.583	0.449	0.788	nan	3.40344	0.00381404	1.24835	0.247463	4.24863	0.00412241	GO:0034641;GO:0006807;GO:0044267;GO:0044260;GO:0071704;GO:0010467;GO:0006508;GO:0009987;GO:0006465;GO:0008150;GO:0008152;GO:0016485;GO:0044238;GO:1901564;GO:0051604;GO:0043603;GO:0019538;GO:0044237;GO:0043170;GO:0006518;	cellular nitrogen compound metabolic process;nitrogen compound metabolic process;cellular protein metabolic process;cellular macromolecule metabolic process;organic substance metabolic process;gene expression;proteolysis;cellular process;signal peptide processing;biological_process;metabolic process;protein processing;primary metabolic process;organonitrogen compound metabolic process;protein mat…	4;3;5;4;3;5;5;2;6;1;2;6;3;4;5;5;4;3;4;5;	GO:0005783;GO:0005789;GO:0042175;GO:0005623;GO:0005622;GO:0043227;GO:0043226;GO:0031224;GO:0005737;GO:0031090;GO:0044432;GO:0016021;GO:0016020;GO:0098588;GO:0044446;GO:0012505;GO:0043231;GO:0044464;GO:0043229;GO:0005575;GO:0044444;GO:0044424;GO:0044425;GO:0044422;	endoplasmic reticulum;endoplasmic reticulum membrane;nuclear outer membrane-endoplasmic reticulum membrane network;cell;intracellular;membrane-bounded organelle;organelle;intrinsic component of membrane;cytoplasm;organelle membrane;endoplasmic reticulum part;integral component of membrane;membrane;bounding membrane of organelle;intracellular organelle part;endomembrane system;intracellular membra…	4;3;3;2;3;3;2;3;4;3;4;4;2;4;3;3;4;2;3;1;4;3;2;2;	GO:0003674;GO:0008233;GO:0008236;GO:0016787;GO:0017171;GO:0003824;GO:0070011;	molecular_function;peptidase activity;serine-type peptidase activity;hydrolase activity;serine hydrolase activity;catalytic activity;peptidase activity, acting on L-amino acid peptides;	1;4;5;3;4;2;5;	K13280	map03060;	Protein export;	IPR001733;IPR015927;IPR019756;	Peptidase S26B;Peptidase S24/S26A/S26B/S26C;Peptidase S26A, signal peptidase I, serine active site;	extracellular	YIR022w	177	U	[U] Intracellular trafficking, secretion, and vesicular transport;
T5A8T1	Proteasome subunit beta OS=Ophiocordyceps sinensis (strain Co18 / CGMCC 3.14243) OX=911162 GN=OCS_06161 PE=3 SV=1	up	2.291	2.135	nan	nan	0.672	0.632	nan	nan	0.645	0.562	nan	nan	3.3942	0.00265038	1.08036	0.402859	3.66694	0.00299987	GO:0032436;GO:0080090;GO:0019222;GO:0010965;GO:0071840;GO:0032434;GO:0051246;GO:0048518;GO:0007088;GO:0060255;GO:0030162;GO:0030163;GO:1902099;GO:1903364;GO:0019538;GO:0010638;GO:0051783;GO:0051781;GO:0051785;GO:0044784;GO:0009896;GO:0045840;GO:0009894;GO:0045842;GO:0009893;GO:0007067;GO:0030071;GO:0044267;GO:1901575;GO:0044265;GO:0044260;GO:0016043;GO:0065007;GO:0044699;GO:1901800;GO:0051130;GO:…	positive regulation of proteasomal ubiquitin-dependent protein catabolic process;regulation of primary metabolic process;regulation of metabolic process;regulation of mitotic sister chromatid separation;cellular component organization or biogenesis;regulation of proteasomal ubiquitin-dependent protein catabolic process;regulation of protein metabolic process;positive regulation of biological proc…	8;4;3;7;2;8;5;2;6;4;6;5;6;6;4;5;5;4;5;6;4;6;4;6;3;5;7;5;4;5;4;3;2;2;7;4;3;6;1;2;4;6;6;6;5;8;5;6;6;5;6;5;5;4;4;5;6;6;4;7;6;5;5;5;7;5;7;2;7;6;4;4;5;5;5;4;6;5;4;4;4;5;5;6;4;6;6;5;4;4;2;3;5;5;6;5;7;5;3;3;5;4;3;6;5;4;4;3;4;5;7;6;3;	GO:0000502;GO:0043234;GO:0043231;GO:0005829;GO:0044424;GO:0043229;GO:0005622;GO:0043227;GO:0044444;GO:0019774;GO:0005737;GO:0005634;GO:0043226;GO:0005839;GO:0044464;GO:0005623;GO:0032991;GO:0005575;	proteasome complex;protein complex;intracellular membrane-bounded organelle;cytosol;intracellular part;intracellular organelle;intracellular;membrane-bounded organelle;cytoplasmic part;proteasome core complex, beta-subunit complex;cytoplasm;nucleus;organelle;proteasome core complex;cell part;cell;macromolecular complex;cellular_component;	4;3;4;5;3;3;3;3;4;4;4;5;2;4;2;2;2;1;	GO:0004298;GO:0003674;GO:0016787;GO:0003824;GO:0008233;GO:0070003;GO:0004175;GO:0070011;	threonine-type endopeptidase activity;molecular_function;hydrolase activity;catalytic activity;peptidase activity;threonine-type peptidase activity;endopeptidase activity;peptidase activity, acting on L-amino acid peptides;	7;1;3;2;4;6;6;5;	K02736	map03050;	Proteasome;	IPR016295;IPR023333;IPR001353;IPR016050;IPR029055;	Proteasome endopeptidase complex, beta subunit;Proteasome B-type subunit;Proteasome, subunit alpha/beta;Proteasome beta-type subunit, conserved site;Nucleophile aminohydrolases, N-terminal;	nucleus	SPBC577.10	252	O	[O] Posttranslational modification, protein turnover, chaperones;
T5AHH2	Peptide-N4-(N-acetyl-beta-glucosaminyl)asparagine amidase A OS=Ophiocordyceps sinensis (strain Co18 / CGMCC 3.14243) OX=911162 GN=OCS_02246 PE=4 SV=1	up	nan	nan	1.642	2.26	nan	nan	0.579	0.574	nan	nan	1.138	0.755	3.38421	0.0470072	0.60909	0.193087	2.06128	0.109816													IPR021102;	Peptide-N4-(N-acetyl-beta-glucosaminyl)asparagine amidase A;	extracellular
T5AJB2	Beta-mannosidase OS=Ophiocordyceps sinensis (strain Co18 / CGMCC 3.14243) OX=911162 GN=OCS_02440 PE=4 SV=1	up	2.108	1.815	3.244	1.723	0.789	0.708	0.393	0.75	0.935	1.04	0.719	0.931	3.36746	0.00498742	0.72828	0.0717846	2.45241	0.0102034	GO:0071704;GO:1901575;GO:0008152;GO:0044238;GO:0005976;GO:0016052;GO:0043170;GO:0008150;GO:0005975;GO:0000272;GO:0009056;GO:0009057;	organic substance metabolic process;organic substance catabolic process;metabolic process;primary metabolic process;polysaccharide metabolic process;carbohydrate catabolic process;macromolecule metabolic process;biological_process;carbohydrate metabolic process;polysaccharide catabolic process;catabolic process;macromolecule catabolic process;	3;4;2;3;5;5;4;1;4;6;3;5;	GO:0005575;GO:0005576;	cellular_component;extracellular region;	1;2;	GO:0016787;GO:0015923;GO:0016798;GO:0003824;GO:0003674;GO:0004567;GO:0004553;	hydrolase activity;mannosidase activity;hydrolase activity, acting on glycosyl bonds;catalytic activity;molecular_function;beta-mannosidase activity;hydrolase activity, hydrolyzing O-glycosyl compounds;	3;6;4;2;1;7;5;	K01192	map00511;map04142;	Other glycan degradation;Lysosome;	IPR013783;IPR008979;IPR017853;IPR006102;	Immunoglobulin-like fold;Galactose-binding domain-like;Glycoside hydrolase superfamily;Glycoside hydrolase, family 2, immunoglobulin-like beta-sandwich;	peroxisome	269839607	650	G	[G] Carbohydrate transport and metabolism;	COG3250	Beta-galactosidase/beta-glucuronidase
T5A623	Ran-interacting protein Mog1 OS=Ophiocordyceps sinensis (strain Co18 / CGMCC 3.14243) OX=911162 GN=OCS_06437 PE=4 SV=1	up	2.682	1.919	2.133	1.814	0.624	0.718	0.584	0.634	0.646	0.698	0.544	0.604	3.33901	0.00025884	1.02729	0.706756	3.43018	0.000247987													IPR016123;IPR007681;	Mog1/PsbP, alpha/beta/alpha sandwich;Ran-interacting Mog1 protein;	cytosol	At1g69680	55.5	T	[T] Signal transduction mechanisms;
T5A666	Succinate--CoA ligase [ADP-forming] subunit alpha, mitochondrial OS=Ophiocordyceps sinensis (strain Co18 / CGMCC 3.14243) OX=911162 GN=OCS_03318 PE=3 SV=1	up	2.789	1.777	2.419	1.896	0.57	0.783	0.616	0.698	0.656	0.74	0.567	0.591	3.33	0.000644999	1.04424	0.658729	3.47729	0.000566696	GO:0044281;GO:0072350;GO:1901362;GO:1901360;GO:0044710;GO:0044711;GO:0043436;GO:0055114;GO:0046483;GO:0043648;GO:0019438;GO:0009141;GO:0009142;GO:0006807;GO:1901576;GO:0051186;GO:0019637;GO:0018130;GO:0035383;GO:0045333;GO:0008152;GO:0034654;GO:0090407;GO:0044271;GO:0015980;GO:0006104;GO:0006101;GO:1901293;GO:0008150;GO:0006753;GO:0006637;GO:0006732;GO:0044249;GO:0034641;GO:0044699;GO:0006139;GO:…	small molecule metabolic process;tricarboxylic acid metabolic process;organic cyclic compound biosynthetic process;organic cyclic compound metabolic process;single-organism metabolic process;single-organism biosynthetic process;oxoacid metabolic process;oxidation-reduction process;heterocycle metabolic process;dicarboxylic acid metabolic process;aromatic compound biosynthetic process;nucleoside t…	4;7;5;4;3;4;5;4;4;7;5;6;6;3;4;4;4;5;4;5;2;5;5;5;4;6;8;5;1;5;5;5;4;4;2;4;2;4;4;4;4;6;6;4;8;3;3;3;3;3;5;4;4;	GO:0031974;GO:1902494;GO:0005759;GO:0043234;GO:0043231;GO:0043233;GO:0044429;GO:0044424;GO:0044422;GO:0043229;GO:0043227;GO:0043226;GO:0045239;GO:0044446;GO:0044444;GO:0005737;GO:0005739;GO:0044464;GO:0005623;GO:0005622;GO:0042709;GO:0032991;GO:0005575;GO:0070013;	membrane-enclosed lumen;catalytic complex;mitochondrial matrix;protein complex;intracellular membrane-bounded organelle;organelle lumen;mitochondrial part;intracellular part;organelle part;intracellular organelle;membrane-bounded organelle;organelle;tricarboxylic acid cycle enzyme complex;intracellular organelle part;cytoplasmic part;cytoplasm;mitochondrion;cell part;cell;intracellular;succinate-…	2;4;5;3;4;3;4;3;2;3;3;2;4;3;4;4;5;2;2;3;5;2;1;4;	GO:1901363;GO:0000166;GO:0035639;GO:0017076;GO:0097367;GO:0005525;GO:0003674;GO:0005488;GO:1901265;GO:0032549;GO:0043168;GO:0003824;GO:0036094;GO:0097159;GO:0032555;GO:0032550;GO:0032553;GO:0043167;GO:0032561;GO:0048037;GO:0016405;GO:0001883;GO:0001882;GO:0019001;GO:0004774;GO:0004775;GO:0004776;GO:0016878;GO:0016874;GO:0016877;	heterocyclic compound binding;nucleotide binding;purine ribonucleoside triphosphate binding;purine nucleotide binding;carbohydrate derivative binding;GTP binding;molecular_function;binding;nucleoside phosphate binding;ribonucleoside binding;anion binding;catalytic activity;small molecule binding;organic cyclic compound binding;purine ribonucleotide binding;purine ribonucleoside binding;ribonucleo…	3;4;5;5;3;6;1;2;4;5;4;2;3;3;5;6;4;3;6;3;5;5;4;6;6;7;7;5;3;4;	K01899	map00020;map00640;map01100;map01110;map01120;map01130;map01200;	Citrate cycle (TCA cycle);Propanoate metabolism;Metabolic pathways;Biosynthesis of secondary metabolites;Microbial metabolism in diverse environments;Biosynthesis of antibiotics;Carbon metabolism;	IPR033847;IPR003781;IPR005810;IPR005811;IPR017440;IPR016102;IPR016040;	ATP-citrate lyase/succinyl-CoA ligase, conserved site;CoA-binding;Succinyl-CoA ligase, alpha subunit;ATP-citrate lyase/succinyl-CoA ligase;ATP-citrate lyase/succinyl-CoA ligase, active site;Succinyl-CoA synthetase-like;NAD(P)-binding domain;	mitochondria	CE05227	416	C	[C] Energy production and conversion;
T5AAF5	Uncharacterized protein OS=Ophiocordyceps sinensis (strain Co18 / CGMCC 3.14243) OX=911162 GN=OCS_04883 PE=4 SV=1	up	1.921	nan	2.38	nan	0.644	nan	0.651	nan	0.741	nan	0.631	nan	3.32127	0.0225357	0.94388	0.557113	3.13484	0.0249984													IPR022234;	Protein of unknown function DUF3759;	cytosol
T5AIU3	Protein prenyltransferase OS=Ophiocordyceps sinensis (strain Co18 / CGMCC 3.14243) OX=911162 GN=OCS_01961 PE=4 SV=1	up	nan	2.201	2.297	nan	nan	0.663	0.694	nan	nan	0.672	0.63	nan	3.31466	0.00102994	1.04224	0.402562	3.45469	0.00107322	GO:0080090;GO:0019222;GO:1901362;GO:0071840;GO:0051716;GO:0010605;GO:0040029;GO:0016458;GO:0048519;GO:0006281;GO:0060255;GO:2001141;GO:0046483;GO:0033554;GO:0019438;GO:0009892;GO:0009890;GO:0010629;GO:0006807;GO:0050789;GO:0097659;GO:1901576;GO:0044260;GO:0016043;GO:0065007;GO:1901360;GO:0018130;GO:0009889;GO:0044710;GO:0050794;GO:0006950;GO:0008150;GO:0008152;GO:0034654;GO:0016070;GO:0044271;GO:…	regulation of primary metabolic process;regulation of metabolic process;organic cyclic compound biosynthetic process;cellular component organization or biogenesis;cellular response to stimulus;negative regulation of macromolecule metabolic process;regulation of gene expression, epigenetic;gene silencing;negative regulation of biological process;DNA repair;regulation of macromolecule metabolic pro…	4;3;5;2;3;4;6;4;2;4;4;6;4;4;5;3;4;5;3;2;7;4;4;3;2;4;5;4;3;3;3;1;2;5;5;5;2;6;5;6;5;6;4;4;5;2;4;6;5;5;2;4;7;7;5;6;5;5;4;4;5;4;4;5;5;6;6;3;5;6;5;5;5;6;3;5;3;4;4;4;3;5;3;5;3;	GO:0031974;GO:0031981;GO:1902493;GO:1902494;GO:0000790;GO:1990234;GO:0043234;GO:0043231;GO:0043232;GO:0043233;GO:0044428;GO:0044424;GO:0044427;GO:0044422;GO:0031248;GO:0000781;GO:0000785;GO:0000228;GO:0005622;GO:0043227;GO:0005654;GO:0098687;GO:0044446;GO:0005737;GO:0000123;GO:0044454;GO:0005634;GO:0044451;GO:0044464;GO:0043229;GO:0005623;GO:0043228;GO:0043226;GO:0005694;GO:0032991;GO:0005575;GO:…	membrane-enclosed lumen;nuclear lumen;acetyltransferase complex;catalytic complex;nuclear chromatin;transferase complex;protein complex;intracellular membrane-bounded organelle;intracellular non-membrane-bounded organelle;organelle lumen;nuclear part;intracellular part;chromosomal part;organelle part;protein acetyltransferase complex;chromosome, telomeric region;chromatin;nuclear chromosome;intra…	2;5;6;4;4;5;3;4;4;3;4;3;4;2;4;6;3;5;3;3;5;5;3;4;5;5;5;5;2;3;2;3;2;5;2;1;4;	GO:0034212;GO:0004402;GO:0016746;GO:0016747;GO:0061733;GO:0010485;GO:0005488;GO:0003824;GO:0016740;GO:0016410;GO:0016407;GO:0044877;GO:0003682;GO:0003674;GO:0008080;	peptide N-acetyltransferase activity;histone acetyltransferase activity;transferase activity, transferring acyl groups;transferase activity, transferring acyl groups other than amino-acyl groups;peptide-lysine-N-acetyltransferase activity;H4 histone acetyltransferase activity;binding;catalytic activity;transferase activity;N-acyltransferase activity;acetyltransferase activity;macromolecular compl…	8;10;4;5;9;11;2;2;3;6;6;3;4;1;7;	K05955	map00900;map01130;	Terpenoid backbone biosynthesis;Biosynthesis of antibiotics;	IPR002088;IPR019467;IPR017380;IPR013523;IPR016181;	Protein prenyltransferase, alpha subunit;Histone acetyl transferase HAT1 N-terminal;Histone acetyltransferase type B, catalytic subunit;Histone acetyltransferase HAT1, C-terminal;Acyl-CoA N-acyltransferase;	nucleus	SPAPB1A10.04c	168	O	[O] Posttranslational modification, protein turnover, chaperones;
T5ALD5	Oligopeptide transporter OPT-like protein OS=Ophiocordyceps sinensis (strain Co18 / CGMCC 3.14243) OX=911162 GN=OCS_01705 PE=4 SV=1	up	1.879	1.739	1.937	2.099	0.648	0.598	0.581	0.52	0.82	0.804	0.758	0.595	3.26115	2.85532e-06	0.78838	0.0344943	2.57104	1.32638e-05	GO:0008104;GO:1901583;GO:0015833;GO:0044699;GO:0042886;GO:0055085;GO:0071705;GO:0071702;GO:0033036;GO:0006857;GO:0006810;GO:0009987;GO:0045184;GO:0015031;GO:0044765;GO:0008150;GO:0051234;GO:0051179;GO:1902578;GO:0044763;GO:0035672;	protein localization;tetrapeptide transmembrane transport;peptide transport;single-organism process;amide transport;transmembrane transport;nitrogen compound transport;organic substance transport;macromolecule localization;oligopeptide transport;transport;cellular process;establishment of protein localization;protein transport;single-organism transport;biological_process;establishment of localiza…	4;6;6;2;5;4;5;5;3;7;4;2;4;5;4;1;3;2;3;3;5;	GO:0005783;GO:0005886;GO:0005789;GO:0042175;GO:0071944;GO:0043227;GO:0043226;GO:0005737;GO:0044446;GO:0031090;GO:0016021;GO:0016020;GO:0044432;GO:0031224;GO:0005794;GO:0098588;GO:0012505;GO:0044425;GO:0043231;GO:0044464;GO:0043229;GO:0005623;GO:0005622;GO:0005575;GO:0044444;GO:0044422;GO:0044424;	endoplasmic reticulum;plasma membrane;endoplasmic reticulum membrane;nuclear outer membrane-endoplasmic reticulum membrane network;cell periphery;membrane-bounded organelle;organelle;cytoplasm;intracellular organelle part;organelle membrane;integral component of membrane;membrane;endoplasmic reticulum part;intrinsic component of membrane;Golgi apparatus;bounding membrane of organelle;endomembrane…	4;3;3;3;3;3;2;4;3;3;4;2;4;3;4;4;3;2;4;2;3;2;3;1;4;2;3;	GO:1901584;GO:0003674;GO:0042887;GO:0022857;GO:0005215;GO:0015198;GO:0015197;GO:1904680;GO:0022891;GO:0022892;GO:0035673;	tetrapeptide transmembrane transporter activity;molecular_function;amide transmembrane transporter activity;transmembrane transporter activity;transporter activity;oligopeptide transporter activity;peptide transporter activity;peptide transmembrane transporter activity;substrate-specific transmembrane transporter activity;substrate-specific transporter activity;oligopeptide transmembrane transpor…	7;1;5;3;2;5;4;5;4;3;6;				IPR004648;IPR004813;	Tetrapeptide transporter, OPT1/isp4;Oligopeptide transporter, OPT superfamily;	plasma membrane	SPBC29B5.02c	640	T	[T] Signal transduction mechanisms;
T5A9D5	Small secreted protein OS=Ophiocordyceps sinensis (strain Co18 / CGMCC 3.14243) OX=911162 GN=OCS_05931 PE=4 SV=1	up	0.902	2.462	1.763	3.205	0.945	0.604	0.608	0.403	1.322	0.801	1.136	0.608	3.25468	0.0287383	0.66201	0.147108	2.15464	0.0742815															cytosol
T5ACW0	Uncharacterized protein OS=Ophiocordyceps sinensis (strain Co18 / CGMCC 3.14243) OX=911162 GN=OCS_04698 PE=4 SV=1	up	2.402	1.803	2.031	2.543	0.701	0.757	0.7	0.561	1.021	0.865	0.792	0.562	3.22872	0.000128925	0.8392	0.257865	2.70957	0.000386079															extracellular
T5AC19	Uncharacterized protein OS=Ophiocordyceps sinensis (strain Co18 / CGMCC 3.14243) OX=911162 GN=OCS_01278 PE=4 SV=1	up	3.078	1.961	2.137	1.924	0.656	0.782	0.726	0.676	0.69	0.786	0.675	0.691	3.2042	0.0012264	0.9993	0.989912	3.20197	0.00122222															extracellular
T5AAX2	Oxysterol-binding protein OS=Ophiocordyceps sinensis (strain Co18 / CGMCC 3.14243) OX=911162 GN=OCS_05389 PE=3 SV=1	up	2.811	1.767	2.43	1.64	0.655	0.691	0.636	0.75	0.672	0.721	0.496	0.776	3.16546	0.00180316	1.02514	0.80693	3.24503	0.00187792	GO:0044249;GO:0016125;GO:0044283;GO:1901362;GO:1901360;GO:1901576;GO:0044710;GO:0044711;GO:0071704;GO:0044699;GO:0008610;GO:0046165;GO:0006694;GO:0016126;GO:0008204;GO:0006629;GO:0044238;GO:0009987;GO:0016128;GO:0016129;GO:1902652;GO:0009058;GO:0008150;GO:0008152;GO:0044255;GO:0008202;GO:0044108;GO:0044107;GO:1902653;GO:0097384;GO:0006066;GO:0006696;GO:0044763;GO:0044237;GO:1901615;GO:1901617;GO:…	cellular biosynthetic process;sterol metabolic process;small molecule biosynthetic process;organic cyclic compound biosynthetic process;organic cyclic compound metabolic process;organic substance biosynthetic process;single-organism metabolic process;single-organism biosynthetic process;organic substance metabolic process;single-organism process;lipid biosynthetic process;alcohol biosynthetic pro…	4;6;5;5;4;4;3;4;3;2;5;6;6;7;5;4;3;2;6;7;6;3;1;2;4;5;5;4;7;5;5;6;3;3;4;5;4;	GO:0032153;GO:0044464;GO:0005623;GO:0005575;	cell division site;cell part;cell;cellular_component;	3;2;2;1;	GO:0008142;GO:0003674;GO:0005488;GO:0032934;GO:0008289;GO:0036094;GO:0005496;GO:0043178;GO:0097159;	oxysterol binding;molecular_function;binding;sterol binding;lipid binding;small molecule binding;steroid binding;alcohol binding;organic cyclic compound binding;	6;1;2;5;3;3;4;4;3;	K20465			IPR000648;IPR018494;	Oxysterol-binding protein;Oxysterol-binding protein, conserved site;	mitochondria	YPL145c	347	T	[T] Signal transduction mechanisms;
T5AP68	Alpha-galactosidase OS=Ophiocordyceps sinensis (strain Co18 / CGMCC 3.14243) OX=911162 GN=OCS_00047 PE=3 SV=1	up	2.919	nan	2.424	1.516	0.629	nan	0.59	0.964	0.764	nan	0.627	0.805	3.14199	0.0218688	0.99408	0.975069	3.12341	0.019922	GO:0071704;GO:0005975;GO:0044238;GO:0008152;GO:0008150;	organic substance metabolic process;carbohydrate metabolic process;primary metabolic process;metabolic process;biological_process;	3;4;3;2;1;	GO:0005575;GO:0005576;	cellular_component;extracellular region;	1;2;	GO:0016787;GO:0052692;GO:0015925;GO:0016798;GO:0003824;GO:0004557;GO:0003674;GO:0004553;	hydrolase activity;raffinose alpha-galactosidase activity;galactosidase activity;hydrolase activity, acting on glycosyl bonds;catalytic activity;alpha-galactosidase activity;molecular_function;hydrolase activity, hydrolyzing O-glycosyl compounds;	3;8;6;4;2;7;1;5;	K07407	map00052;map00561;map00600;map00603;	Galactose metabolism;Glycerolipid metabolism;Sphingolipid metabolism;Glycosphingolipid biosynthesis - globo series;	IPR031705;IPR031704;IPR013785;IPR002252;IPR017853;IPR000111;	Glycosyl hydrolase family 36, C-terminal;Glycosyl hydrolase family 36, N-terminal;Aldolase-type TIM barrel;Glycoside hydrolase family 36;Glycoside hydrolase superfamily;Glycoside hydrolase family 27/36, conserved site;	extracellular	430749739	578	G	[G] Carbohydrate transport and metabolism;	COG3345	Alpha-galactosidase
T5AAZ4	DEAD-like helicase OS=Ophiocordyceps sinensis (strain Co18 / CGMCC 3.14243) OX=911162 GN=OCS_05363 PE=3 SV=1	up	3.537	2.241	1.258	1.606	0.535	0.623	0.988	0.618	0.651	0.538	1.229	0.8	3.12666	0.0284224	0.85892	0.555734	2.68552	0.0414023	GO:0051169;GO:0051168;GO:0008104;GO:0071840;GO:0043043;GO:0033036;GO:0045184;GO:1901564;GO:1901566;GO:0019538;GO:0032984;GO:0006807;GO:0051028;GO:1901576;GO:0044260;GO:0016043;GO:0006810;GO:0008150;GO:0008152;GO:0051236;GO:0051234;GO:0050658;GO:0044271;GO:0046907;GO:0050657;GO:0022411;GO:0006518;GO:0015931;GO:0071166;GO:0044249;GO:0034641;GO:0034645;GO:0043241;GO:0044699;GO:0009987;GO:0009058;GO:…	nuclear transport;nuclear export;protein localization;cellular component organization or biogenesis;peptide biosynthetic process;macromolecule localization;establishment of protein localization;organonitrogen compound metabolic process;organonitrogen compound biosynthetic process;protein metabolic process;macromolecular complex disassembly;nitrogen compound metabolic process;mRNA transport;organi…	6;8;4;2;6;3;4;4;5;4;5;3;6;4;4;3;4;1;2;4;3;5;5;5;7;4;5;6;4;4;4;5;6;2;2;3;6;5;4;4;5;5;3;5;5;4;6;6;5;7;4;5;3;4;7;2;3;3;3;5;6;3;5;5;7;6;	GO:0030427;GO:0031975;GO:0016020;GO:0031965;GO:0031967;GO:0044614;GO:0043234;GO:0043231;GO:0044428;GO:0044424;GO:0044422;GO:1990904;GO:0043229;GO:0005622;GO:0043227;GO:0043226;GO:0012505;GO:0005933;GO:0005844;GO:0005643;GO:0044446;GO:0005934;GO:0005737;GO:0031090;GO:0005634;GO:0005635;GO:0044464;GO:0005623;GO:0030529;GO:0032991;GO:0005575;	site of polarized growth;envelope;membrane;nuclear membrane;organelle envelope;nuclear pore cytoplasmic filaments;protein complex;intracellular membrane-bounded organelle;nuclear part;intracellular part;organelle part;ribonucleoprotein complex;intracellular organelle;intracellular;membrane-bounded organelle;organelle;endomembrane system;cellular bud;polysome;nuclear pore;intracellular organelle p…	3;3;2;4;4;4;3;4;4;3;2;3;3;3;3;2;3;3;5;5;3;4;4;3;5;4;2;2;4;2;1;	GO:0008186;GO:1901363;GO:0000166;GO:0004386;GO:0016818;GO:0030554;GO:0016817;GO:0097367;GO:0003674;GO:0005488;GO:0016887;GO:1901265;GO:0042623;GO:0032549;GO:0017076;GO:0005524;GO:0016787;GO:0017111;GO:0003824;GO:0097159;GO:0016462;GO:0032559;GO:0032555;GO:0032550;GO:0032553;GO:0035639;GO:0043167;GO:0043178;GO:0003724;GO:0003723;GO:0003676;GO:0001883;GO:0001882;GO:0000822;GO:0036094;GO:0043168;	RNA-dependent ATPase activity;heterocyclic compound binding;nucleotide binding;helicase activity;hydrolase activity, acting on acid anhydrides, in phosphorus-containing anhydrides;adenyl nucleotide binding;hydrolase activity, acting on acid anhydrides;carbohydrate derivative binding;molecular_function;binding;ATPase activity;nucleoside phosphate binding;ATPase activity, coupled;ribonucleoside bin…	10;3;4;8;5;6;4;3;1;2;8;4;9;5;5;6;3;7;2;3;6;6;5;6;4;5;3;4;9;5;4;5;4;5;3;4;	K18655			IPR000629;IPR011545;IPR001650;IPR014014;IPR014001;IPR027417;	ATP-dependent RNA helicase DEAD-box, conserved site;DEAD/DEAH box helicase domain;Helicase, C-terminal;RNA helicase, DEAD-box type, Q motif;Helicase superfamily 1/2, ATP-binding domain;P-loop containing nucleoside triphosphate hydrolase;	nucleus	YOR046c	462	A	[A] RNA processing and modification;
T5AHY2	Cell division control protein 2 (Cyclin-dependent protein kinase) OS=Ophiocordyceps sinensis (strain Co18 / CGMCC 3.14243) OX=911162 GN=OCS_02105 PE=3 SV=1	up	nan	1.814	2.379	nan	nan	0.717	0.628	nan	nan	0.641	0.567	nan	3.1175	0.0380462	1.11341	0.358178	3.47103	0.0345632	GO:1903047;GO:0022402;GO:0051301;GO:0007067;GO:0007049;GO:0071840;GO:0000280;GO:0016043;GO:0044699;GO:0000278;GO:0009987;GO:0008150;GO:0006996;GO:0044763;GO:1902589;GO:0048285;	mitotic cell cycle process;cell cycle process;cell division;mitotic nuclear division;cell cycle;cellular component organization or biogenesis;nuclear division;cellular component organization;single-organism process;mitotic cell cycle;cellular process;biological_process;organelle organization;single-organism cellular process;single-organism organelle organization;organelle fission;	5;4;4;5;4;2;6;3;2;5;2;1;4;3;4;5;				GO:0035639;GO:0005488;GO:0004693;GO:0008353;GO:0001883;GO:1901363;GO:0001882;GO:0043168;GO:0097472;GO:0032549;GO:0043167;GO:0004674;GO:0016740;GO:0004672;GO:0017076;GO:0005524;GO:0016301;GO:0000166;GO:1901265;GO:0036094;GO:0003824;GO:0030554;GO:0016773;GO:0016772;GO:0097367;GO:0032559;GO:0097159;GO:0032555;GO:0003674;GO:0032550;GO:0032553;	purine ribonucleoside triphosphate binding;binding;cyclin-dependent protein serine/threonine kinase activity;RNA polymerase II carboxy-terminal domain kinase activity;purine nucleoside binding;heterocyclic compound binding;nucleoside binding;anion binding;cyclin-dependent protein kinase activity;ribonucleoside binding;ion binding;protein serine/threonine kinase activity;transferase activity;prote…	5;2;8;8;5;3;4;4;7;5;3;7;3;6;5;6;5;4;4;3;2;6;5;4;3;6;3;5;1;6;4;	K04563	map04011;map04111;map04113;	MAPK signaling pathway - yeast;Cell cycle - yeast;Meiosis - yeast;	IPR017441;IPR008271;IPR011009;IPR000719;	Protein kinase, ATP binding site;Serine/threonine-protein kinase, active site;Protein kinase-like domain;Protein kinase domain;	mitochondria	YBR160w	443	R	[R] General function prediction only;
T5AN30	60S ribosomal protein L32 OS=Ophiocordyceps sinensis (strain Co18 / CGMCC 3.14243) OX=911162 GN=OCS_01151 PE=4 SV=1	up	3.144	nan	1.895	1.595	0.485	nan	0.806	0.848	0.776	nan	0.425	0.592	3.10145	0.037272	1.19297	0.492981	3.69994	0.0291864	GO:0044249;GO:0034641;GO:0006807;GO:0034645;GO:1901576;GO:0044260;GO:0043043;GO:0071704;GO:0010467;GO:0044267;GO:0009987;GO:0009058;GO:0009059;GO:0008150;GO:0008152;GO:1901564;GO:0043604;GO:0044238;GO:0044271;GO:0043603;GO:1901566;GO:0019538;GO:0044237;GO:0043170;GO:0006518;GO:0006412;	cellular biosynthetic process;cellular nitrogen compound metabolic process;nitrogen compound metabolic process;cellular macromolecule biosynthetic process;organic substance biosynthetic process;cellular macromolecule metabolic process;peptide biosynthetic process;organic substance metabolic process;gene expression;cellular protein metabolic process;cellular process;biosynthetic process;macromolec…	4;4;3;5;4;4;6;3;5;5;2;3;5;1;2;4;6;3;5;5;5;4;3;4;5;6;	GO:0015934;GO:0022625;GO:1990904;GO:0043232;GO:0005623;GO:0022626;GO:0030529;GO:0043226;GO:0005737;GO:0044445;GO:0032991;GO:0005622;GO:0044446;GO:0044391;GO:0005840;GO:0005829;GO:0044464;GO:0043229;GO:0005575;GO:0044444;GO:0043228;GO:0044424;GO:0044422;	large ribosomal subunit;cytosolic large ribosomal subunit;ribonucleoprotein complex;intracellular non-membrane-bounded organelle;cell;cytosolic ribosome;intracellular ribonucleoprotein complex;organelle;cytoplasm;cytosolic part;macromolecular complex;intracellular;intracellular organelle part;ribosomal subunit;ribosome;cytosol;cell part;intracellular organelle;cellular_component;cytoplasmic part;…	5;6;3;4;2;6;4;2;4;5;2;3;3;4;5;5;2;3;1;4;3;3;2;	GO:0003674;GO:0005198;GO:0003735;	molecular_function;structural molecule activity;structural constituent of ribosome;	1;2;3;	K02912	map03010;	Ribosome;	IPR001515;	Ribosomal protein L32e;	mitochondria	SPAC3H5.10	179	J	[J] Translation, ribosomal structure and biogenesis;
T5ADC3	Glutaminase GtaA OS=Ophiocordyceps sinensis (strain Co18 / CGMCC 3.14243) OX=911162 GN=OCS_00816 PE=4 SV=1	up	1.665	2.053	1.426	2.168	0.795	0.577	0.528	0.499	1.173	0.854	0.693	0.921	3.04794	0.000554831	0.65888	0.0416225	2.00824	0.00362246				GO:0005575;GO:0005576;	cellular_component;extracellular region;	1;2;	GO:0016787;GO:0004359;GO:0016810;GO:0016811;GO:0003824;GO:0003674;	hydrolase activity;glutaminase activity;hydrolase activity, acting on carbon-nitrogen (but not peptide) bonds;hydrolase activity, acting on carbon-nitrogen (but not peptide) bonds, in linear amides;catalytic activity;molecular_function;	3;6;4;5;2;1;				IPR014870;IPR032514;IPR033433;	Domain of unknown function DUF1793;Domain of unknown function DUF4965;Domain of unknown function DUF5127;	extracellular	374309916	313	G	[G] Carbohydrate transport and metabolism;	COG3387	Glucoamylase (glucan-1,4-alpha-glucosidase), GH15 family
T5AHU3	Bifunctional xylanase/deacetylase OS=Ophiocordyceps sinensis (strain Co18 / CGMCC 3.14243) OX=911162 GN=OCS_02876 PE=4 SV=1	up	1.894	nan	2.468	1.376	0.798	nan	0.509	0.58	0.697	nan	0.586	0.785	3.04081	0.0171907	0.91248	0.593906	2.77466	0.0188435	GO:0071704;GO:0044238;GO:0005975;GO:0008152;GO:0008150;	organic substance metabolic process;primary metabolic process;carbohydrate metabolic process;metabolic process;biological_process;	3;3;4;2;1;	GO:0005575;GO:0005576;	cellular_component;extracellular region;	1;2;	GO:0043169;GO:0016787;GO:0016810;GO:0043167;GO:0003824;GO:0003674;GO:0005488;GO:0046872;	cation binding;hydrolase activity;hydrolase activity, acting on carbon-nitrogen (but not peptide) bonds;ion binding;catalytic activity;molecular_function;binding;metal ion binding;	4;3;4;3;2;1;2;5;				IPR011330;IPR002509;	Glycoside hydrolase/deacetylase, beta/alpha-barrel;NodB homology domain;	cytosol	403512294	97.1	GM	[G] Carbohydrate transport and metabolism; [M] Cell wall/membrane/envelope biogenesis;	COG0726	Peptidoglycan/xylan/chitin deacetylase, PgdA/CDA1 family
T5AMG4	Peptidase A1 OS=Ophiocordyceps sinensis (strain Co18 / CGMCC 3.14243) OX=911162 GN=OCS_00512 PE=3 SV=1	up	1.669	2.015	2.353	1.961	0.716	0.646	0.568	0.708	0.842	0.65	0.521	0.692	3.03186	8.83555e-05	0.97523	0.829582	2.95675	0.000141809	GO:0044248;GO:0044267;GO:1901575;GO:0044265;GO:0044260;GO:0071704;GO:0006508;GO:0044238;GO:0009987;GO:0008150;GO:0030163;GO:0008152;GO:0044257;GO:0009056;GO:0009057;GO:0051603;GO:0019538;GO:0044237;GO:0043170;	cellular catabolic process;cellular protein metabolic process;organic substance catabolic process;cellular macromolecule catabolic process;cellular macromolecule metabolic process;organic substance metabolic process;proteolysis;primary metabolic process;cellular process;biological_process;protein catabolic process;metabolic process;cellular protein catabolic process;catabolic process;macromolecul…	4;5;4;5;4;3;5;3;2;1;5;2;6;3;5;6;4;3;4;	GO:0000324;GO:0000323;GO:0000322;GO:0043229;GO:0005623;GO:0005622;GO:0043227;GO:0043226;GO:0005737;GO:0005773;GO:0043231;GO:0044464;GO:0005575;GO:0044444;GO:0044424;	fungal-type vacuole;lytic vacuole;storage vacuole;intracellular organelle;cell;intracellular;membrane-bounded organelle;organelle;cytoplasm;vacuole;intracellular membrane-bounded organelle;cell part;cellular_component;cytoplasmic part;intracellular part;	7;6;6;3;2;3;3;2;4;5;4;2;1;4;3;	GO:0004175;GO:0003674;GO:0008233;GO:0070001;GO:0016787;GO:0003824;GO:0070011;GO:0004190;	endopeptidase activity;molecular_function;peptidase activity;aspartic-type peptidase activity;hydrolase activity;catalytic activity;peptidase activity, acting on L-amino acid peptides;aspartic-type endopeptidase activity;	6;1;4;6;3;2;5;7;	K01381			IPR001969;IPR033121;IPR001461;IPR021109;	Aspartic peptidase, active site;Peptidase family A1 domain;Aspartic peptidase A1 family;Aspartic peptidase domain;	extracellular	YPL154c	479	O	[O] Posttranslational modification, protein turnover, chaperones;
T5AKC5	Uncharacterized protein OS=Ophiocordyceps sinensis (strain Co18 / CGMCC 3.14243) OX=911162 GN=OCS_01428 PE=4 SV=1	up	1.921	1.699	1.871	2.407	0.676	0.697	0.774	0.463	0.725	0.683	0.848	0.27	3.02608	0.000207007	1.03325	0.887319	3.12668	0.000488017															extracellular
T5AD29	AltA1 domain-containing protein OS=Ophiocordyceps sinensis (strain Co18 / CGMCC 3.14243) OX=911162 GN=OCS_04553 PE=4 SV=1	up	2.997	2.605	1.731	1.769	0.715	0.642	0.796	0.894	0.713	0.614	1.032	0.815	2.98721	0.00315003	0.95999	0.77168	2.86767	0.00392961													IPR032382;	Alternaria alternata allergen 1;	extracellular
T5A844	Gamma interferon inducible lysosomal thiol reductase GILT OS=Ophiocordyceps sinensis (strain Co18 / CGMCC 3.14243) OX=911162 GN=OCS_05694 PE=4 SV=1	up	1.704	2.057	2.223	1.758	0.713	0.648	0.583	0.656	0.931	0.709	0.738	0.662	2.9777	5.20512e-05	0.85526	0.140647	2.54671	0.000136351													IPR004911;	Gamma interferon inducible lysosomal thiol reductase GILT;	mitochondria	7299765	53.5	O	[O] Posttranslational modification, protein turnover, chaperones;
T5A3H2	Uncharacterized protein OS=Ophiocordyceps sinensis (strain Co18 / CGMCC 3.14243) OX=911162 GN=OCS_04279 PE=4 SV=1	up	2.1	nan	2.608	nan	0.892	nan	0.703	nan	0.871	nan	0.45	nan	2.95168	0.0290035	1.20742	0.612892	3.56397	0.035914															extracellular
T5AIH8	Uncharacterized protein OS=Ophiocordyceps sinensis (strain Co18 / CGMCC 3.14243) OX=911162 GN=OCS_01881 PE=4 SV=1	up	2.625	1.832	2.576	1.189	0.626	0.673	0.635	0.87	0.707	0.685	0.471	0.654	2.93221	0.00783412	1.11402	0.396516	3.26659	0.00614428															mitochondria
T5ALE0	Hsp90 co-chaperone Cdc37 OS=Ophiocordyceps sinensis (strain Co18 / CGMCC 3.14243) OX=911162 GN=OCS_01055 PE=4 SV=1	up	2.428	1.899	nan	nan	0.666	0.813	nan	nan	0.72	0.627	nan	nan	2.9256	0.0352137	1.098	0.527182	3.21232	0.0309842										K09554	map04151;	PI3K-Akt signaling pathway;	IPR004918;IPR013874;IPR013855;	Cdc37;Cdc37, Hsp90 binding;Cdc37, N-terminal domain;	nucleus	SPBC9B6.10	231	D	[D] Cell cycle control, cell division, chromosome partitioning;
T5AKA5	Uncharacterized protein OS=Ophiocordyceps sinensis (strain Co18 / CGMCC 3.14243) OX=911162 GN=OCS_02116 PE=4 SV=1	up	2.17	2.181	1.989	1.583	0.782	0.71	0.578	0.647	0.894	0.746	0.618	0.834	2.91605	0.000112559	0.87872	0.252787	2.56242	0.000211413															extracellular
T5AHI0	Alcohol dehydrogenase superfamily, zinc-type OS=Ophiocordyceps sinensis (strain Co18 / CGMCC 3.14243) OX=911162 GN=OCS_02415 PE=4 SV=1	up	2.45	1.869	2.344	1.416	0.64	0.731	0.642	0.764	0.727	0.668	0.73	0.708	2.90926	0.0014729	0.98023	0.699465	2.85175	0.0015013										K00008	map00040;map00051;map01100;	Pentose and glucuronate interconversions;Fructose and mannose metabolism;Metabolic pathways;	IPR016040;	NAD(P)-binding domain;	cytosol	Hs4507155	67.4	Q	[Q] Secondary metabolites biosynthesis, transport and catabolism;
T5A4Z5	Cysteinyl-tRNA synthetase OS=Ophiocordyceps sinensis (strain Co18 / CGMCC 3.14243) OX=911162 GN=OCS_03754 PE=3 SV=1	up	1.491	2.224	1.882	1.875	0.609	0.575	0.668	0.722	0.5	0.564	0.586	0.602	2.90284	0.000204707	1.14298	0.0873066	3.31794	0.000134297	GO:1901566;GO:0019752;GO:0090304;GO:0044249;GO:0034641;GO:0006807;GO:0034645;GO:0034660;GO:0044710;GO:0006399;GO:1901360;GO:0006520;GO:0043043;GO:0006418;GO:0071704;GO:0010467;GO:0043604;GO:0006423;GO:0006139;GO:0009987;GO:0006725;GO:0044267;GO:0009058;GO:0009059;GO:0008150;GO:0008152;GO:0043436;GO:0044271;GO:0046483;GO:0016070;GO:0044238;GO:0044699;GO:1901564;GO:0044260;GO:0006082;GO:0044237;GO:…	organonitrogen compound biosynthetic process;carboxylic acid metabolic process;nucleic acid metabolic process;cellular biosynthetic process;cellular nitrogen compound metabolic process;nitrogen compound metabolic process;cellular macromolecule biosynthetic process;ncRNA metabolic process;single-organism metabolic process;tRNA metabolic process;organic cyclic compound metabolic process;cellular am…	5;6;5;4;4;3;5;6;3;7;4;4;6;7;3;5;6;8;4;2;4;5;3;5;1;2;5;5;4;5;3;2;4;4;4;3;4;4;5;6;5;4;3;5;6;4;				GO:0035639;GO:0003674;GO:0005488;GO:0000166;GO:1901363;GO:1901265;GO:0001882;GO:0043168;GO:0043169;GO:0004812;GO:0004817;GO:0043167;GO:0001883;GO:0032549;GO:0017076;GO:0046872;GO:0005524;GO:0036094;GO:0003824;GO:0016874;GO:0016875;GO:0016876;GO:0030554;GO:0097367;GO:0097159;GO:0032559;GO:0032555;GO:0032550;GO:0032553;	purine ribonucleoside triphosphate binding;molecular_function;binding;nucleotide binding;heterocyclic compound binding;nucleoside phosphate binding;nucleoside binding;anion binding;cation binding;aminoacyl-tRNA ligase activity;cysteine-tRNA ligase activity;ion binding;purine nucleoside binding;ribonucleoside binding;purine nucleotide binding;metal ion binding;ATP binding;small molecule binding;ca…	5;1;2;4;3;4;4;4;4;6;7;3;5;5;5;5;6;3;2;3;4;5;6;3;3;6;5;6;4;	K01883	map00970;	Aminoacyl-tRNA biosynthesis;	IPR032678;IPR009080;IPR014729;IPR024909;IPR015803;	tRNA synthetases class I, catalytic domain;Aminoacyl-tRNA synthetase, class Ia, anticodon-binding;Rossmann-like alpha/beta/alpha sandwich fold;Cysteinyl-tRNA synthetase/mycothiol ligase;Cysteine-tRNA ligase;	cytosol	SPAC29E6.06c	529	J	[J] Translation, ribosomal structure and biogenesis;
T5AHA7	Acetyl-coenzyme A synthetase OS=Ophiocordyceps sinensis (strain Co18 / CGMCC 3.14243) OX=911162 GN=OCS_03076 PE=3 SV=1	up	1.661	2.084	2.765	2.044	0.85	0.728	0.659	0.735	1.004	0.717	0.572	0.656	2.87819	0.000972596	1.0078	0.956775	2.90064	0.00131797	GO:0006637;GO:0006732;GO:0044237;GO:0044272;GO:0019752;GO:0044249;GO:0044710;GO:0051186;GO:0051188;GO:0071704;GO:0019427;GO:0035383;GO:0009987;GO:0035384;GO:1901576;GO:0032787;GO:0009058;GO:0044711;GO:0008150;GO:0008152;GO:0043436;GO:0006084;GO:0006085;GO:0044699;GO:0006082;GO:0006083;GO:0006790;GO:0044763;GO:0071616;GO:0006793;GO:0009108;GO:0044281;	acyl-CoA metabolic process;coenzyme metabolic process;cellular metabolic process;sulfur compound biosynthetic process;carboxylic acid metabolic process;cellular biosynthetic process;single-organism metabolic process;cofactor metabolic process;cofactor biosynthetic process;organic substance metabolic process;acetyl-CoA biosynthetic process from acetate;thioester metabolic process;cellular process;…	5;5;3;5;6;4;3;4;5;3;5;4;2;5;4;7;3;4;1;2;5;6;7;2;4;8;4;3;6;4;6;4;	GO:0043229;GO:0043227;GO:0043226;GO:0005737;GO:0005634;GO:0043231;GO:0044464;GO:0005623;GO:0005622;GO:0005575;GO:0044424;	intracellular organelle;membrane-bounded organelle;organelle;cytoplasm;nucleus;intracellular membrane-bounded organelle;cell part;cell;intracellular;cellular_component;intracellular part;	3;3;2;4;5;4;2;2;3;1;3;	GO:0016405;GO:1901363;GO:0003674;GO:0005488;GO:0000166;GO:1901265;GO:0001882;GO:0043169;GO:0003824;GO:0035639;GO:0043167;GO:0001883;GO:0032549;GO:0017076;GO:0005524;GO:0043168;GO:0016208;GO:0036094;GO:0032555;GO:0003987;GO:0016874;GO:0016877;GO:0030554;GO:0097367;GO:0097159;GO:0016878;GO:0032559;GO:0032550;GO:0032553;	CoA-ligase activity;heterocyclic compound binding;molecular_function;binding;nucleotide binding;nucleoside phosphate binding;nucleoside binding;cation binding;catalytic activity;purine ribonucleoside triphosphate binding;ion binding;purine nucleoside binding;ribonucleoside binding;purine nucleotide binding;ATP binding;anion binding;AMP binding;small molecule binding;purine ribonucleotide binding;…	5;3;1;2;4;4;4;4;2;5;3;5;5;5;6;4;5;3;5;6;3;4;6;3;3;5;6;6;4;	K01895	map00010;map00620;map00640;map00680;map00720;map01100;map01110;map01120;map01130;map01200;	Glycolysis / Gluconeogenesis;Pyruvate metabolism;Propanoate metabolism;Methane metabolism;Carbon fixation pathways in prokaryotes;Metabolic pathways;Biosynthesis of secondary metabolites;Microbial metabolism in diverse environments;Biosynthesis of antibiotics;Carbon metabolism;	IPR000873;IPR025110;IPR020845;IPR011904;	AMP-dependent synthetase/ligase;AMP-binding enzyme, C-terminal domain;AMP-binding, conserved site;Acetate-CoA ligase;	cytosol	YLR153c	800	I	[I] Lipid transport and metabolism;
T5A7F7	Uncharacterized protein OS=Ophiocordyceps sinensis (strain Co18 / CGMCC 3.14243) OX=911162 GN=OCS_05935 PE=4 SV=1	up	2.581	1.538	1.227	1.498	0.531	0.56	0.637	0.655	0.664	0.789	0.697	0.779	2.872	0.00982403	0.81359	0.0188669	2.33663	0.0171221													IPR008462;	CsbD-like domain;	cytosol
T5AML3	Oxalate decarboxylase oxdC OS=Ophiocordyceps sinensis (strain Co18 / CGMCC 3.14243) OX=911162 GN=OCS_01209 PE=4 SV=1	up	1.942	1.907	2.652	1.949	0.855	0.793	0.618	0.706	0.981	0.797	0.63	0.687	2.84317	0.00033433	0.96026	0.752077	2.73021	0.000483012	GO:0019752;GO:0044237;GO:0044699;GO:0044710;GO:0071704;GO:0009987;GO:0033609;GO:0008150;GO:0008152;GO:0043436;GO:0043648;GO:0006082;GO:0044763;GO:0044281;	carboxylic acid metabolic process;cellular metabolic process;single-organism process;single-organism metabolic process;organic substance metabolic process;cellular process;oxalate metabolic process;biological_process;metabolic process;oxoacid metabolic process;dicarboxylic acid metabolic process;organic acid metabolic process;single-organism cellular process;small molecule metabolic process;	6;3;2;3;3;2;8;1;2;5;7;4;3;4;	GO:0031975;GO:0030288;GO:0005737;GO:0042597;GO:0030313;GO:0044464;GO:0005623;GO:0005622;GO:0005575;GO:0044424;	envelope;outer membrane-bounded periplasmic space;cytoplasm;periplasmic space;cell envelope;cell part;cell;intracellular;cellular_component;intracellular part;	3;4;4;3;4;2;2;3;1;3;	GO:0005488;GO:0016830;GO:0003674;GO:0043169;GO:0016829;GO:0043167;GO:0046872;GO:0046564;GO:0003824;GO:0016831;GO:0045735;	binding;carbon-carbon lyase activity;molecular_function;cation binding;lyase activity;ion binding;metal ion binding;oxalate decarboxylase activity;catalytic activity;carboxy-lyase activity;nutrient reservoir activity;	2;4;1;4;3;3;5;6;2;5;2;				IPR017774;IPR006045;IPR011051;IPR014710;	Bicupin, oxalate decarboxylase/oxidase;Cupin 1;RmlC-like cupin domain;RmlC-like jelly roll fold;	extracellular	16080377	415	G	[G] Carbohydrate transport and metabolism;	COG2140	Oxalate decarboxylase/archaeal phosphoglucose isomerase, cupin superfamily
T5AEI9	Alpha/beta hydrolase OS=Ophiocordyceps sinensis (strain Co18 / CGMCC 3.14243) OX=911162 GN=OCS_03284 PE=4 SV=1	up	nan	2.055	nan	1.569	nan	0.521	nan	0.755	nan	0.667	nan	1.084	2.8401	0.0489334	0.72873	0.425209	2.06967	0.0997168										K01054	map00561;map01100;map04723;map04923;	Glycerolipid metabolism;Metabolic pathways;Retrograde endocannabinoid signaling;Regulation of lipolysis in adipocytes;	IPR022742;IPR029058;	Serine aminopeptidase, S33;Alpha/Beta hydrolase fold;	mitochondria	SPCC5E4.05c	62.8	I	[I] Lipid transport and metabolism;
T5AQZ0	Cytochrome c oxidase polypeptide V OS=Ophiocordyceps sinensis (strain Co18 / CGMCC 3.14243) OX=911162 GN=OCS_00161 PE=4 SV=1	up	2.09	nan	2.211	1.852	0.73	nan	0.566	0.872	0.651	nan	0.806	0.587	2.83809	0.000644294	1.06067	0.725567	3.01027	0.00038056	GO:0009167;GO:0044281;GO:0009161;GO:1901360;GO:0044710;GO:0009199;GO:0022900;GO:0022904;GO:0098662;GO:0009205;GO:0046034;GO:0046128;GO:0055114;GO:0046483;GO:1901564;GO:0006163;GO:0019637;GO:0009141;GO:0009144;GO:0006807;GO:0015992;GO:0044699;GO:0098660;GO:0006119;GO:0006818;GO:0006812;GO:0006811;GO:0006810;GO:0009150;GO:0008150;GO:0008152;GO:0051234;GO:0015980;GO:0044763;GO:0006753;GO:1902600;GO:…	purine ribonucleoside monophosphate metabolic process;small molecule metabolic process;ribonucleoside monophosphate metabolic process;organic cyclic compound metabolic process;single-organism metabolic process;ribonucleoside triphosphate metabolic process;electron transport chain;respiratory electron transport chain;inorganic cation transmembrane transport;purine ribonucleoside triphosphate metab…	8;4;7;4;3;7;4;5;7;8;8;7;4;4;4;6;4;6;7;3;6;2;6;5;5;6;5;4;7;1;2;3;4;3;5;7;6;4;6;7;6;4;6;6;7;4;4;4;4;6;6;5;5;4;5;3;2;5;5;4;6;5;6;7;2;3;3;3;4;4;6;	GO:0044444;GO:0031975;GO:0016021;GO:0016020;GO:0031967;GO:0031966;GO:0043234;GO:0043231;GO:0044429;GO:0044425;GO:0044422;GO:0043229;GO:0043227;GO:0043226;GO:0044464;GO:0044424;GO:0031224;GO:0005737;GO:0031090;GO:0005739;GO:0044455;GO:0005623;GO:0005622;GO:0005743;GO:0005740;GO:0005746;GO:0070469;GO:0044446;GO:0098796;GO:0098803;GO:0070069;GO:0098800;GO:0005751;GO:0032991;GO:0045277;GO:0005575;GO:…	cytoplasmic part;envelope;integral component of membrane;membrane;organelle envelope;mitochondrial membrane;protein complex;intracellular membrane-bounded organelle;mitochondrial part;membrane part;organelle part;intracellular organelle;membrane-bounded organelle;organelle;cell part;intracellular part;intrinsic component of membrane;cytoplasm;organelle membrane;mitochondrion;mitochondrial membran…	4;3;4;2;4;4;3;4;4;2;2;3;3;2;2;3;3;4;3;5;3;2;3;5;5;4;3;3;3;4;4;4;5;2;4;1;4;4;	GO:0015002;GO:0003674;GO:0004129;GO:0003824;GO:0022891;GO:0022890;GO:0022892;GO:0015075;GO:0015077;GO:0016676;GO:0016675;GO:0015078;GO:0016491;GO:0005215;GO:0008324;GO:0009055;GO:0022857;	heme-copper terminal oxidase activity;molecular_function;cytochrome-c oxidase activity;catalytic activity;substrate-specific transmembrane transporter activity;inorganic cation transmembrane transporter activity;substrate-specific transporter activity;ion transmembrane transporter activity;monovalent inorganic cation transmembrane transporter activity;oxidoreductase activity, acting on a heme gro…	4;1;3;2;4;7;3;5;8;5;4;9;3;2;6;2;3;	K02263	map00190;map01100;map04260;map04932;map05010;map05012;map05016;	Oxidative phosphorylation;Metabolic pathways;Cardiac muscle contraction;Non-alcoholic fatty liver disease (NAFLD);Alzheimer's disease;Parkinson's disease;Huntington's disease;	IPR004203;	Cytochrome c oxidase subunit IV family;	mitochondria	SPCC338.10c	116	C	[C] Energy production and conversion;
T5A6V3	Succinyl-CoA:3-ketoacid-coenzyme A transferase OS=Ophiocordyceps sinensis (strain Co18 / CGMCC 3.14243) OX=911162 GN=OCS_05954 PE=3 SV=1	up	3.018	1.835	0.872	1.768	0.58	0.605	0.943	0.537	0.584	0.625	1.282	0.558	2.8116	0.0364276	0.87406	0.643766	2.45753	0.0572591	GO:0035774;GO:0090087;GO:0008104;GO:0051046;GO:0032024;GO:0051049;GO:0048584;GO:0048583;GO:0032846;GO:0032844;GO:0072359;GO:0072358;GO:0044281;GO:0044282;GO:0044255;GO:0044712;GO:0051716;GO:0035773;GO:0046879;GO:0048513;GO:0071331;GO:0071333;GO:0048518;GO:0033036;GO:0019725;GO:0051050;GO:0014823;GO:1902224;GO:0045184;GO:0090276;GO:0090277;GO:0010033;GO:0044700;GO:0009605;GO:0044707;GO:0034284;GO:…	positive regulation of insulin secretion involved in cellular response to glucose stimulus;regulation of peptide transport;protein localization;regulation of secretion;positive regulation of insulin secretion;regulation of transport;positive regulation of response to stimulus;regulation of response to stimulus;positive regulation of homeostatic process;regulation of homeostatic process;circulator…	4;5;4;5;6;4;3;3;3;3;5;5;4;5;4;4;3;5;6;4;8;7;2;3;4;3;3;4;4;5;5;4;3;3;3;6;6;7;5;4;4;3;3;5;4;5;4;5;2;7;6;4;3;6;2;5;3;5;4;5;4;6;3;3;1;6;4;3;5;4;5;2;5;2;3;6;2;5;4;4;4;4;4;2;4;3;5;3;4;2;4;2;4;2;4;4;5;3;4;4;4;4;4;3;4;4;7;4;8;5;4;4;5;4;6;5;3;5;5;4;5;4;3;6;4;3;4;4;3;3;2;3;3;7;5;5;5;5;6;6;5;3;5;5;3;	GO:0031974;GO:0043231;GO:0043233;GO:0044429;GO:0044424;GO:0044422;GO:0044464;GO:0043227;GO:0005737;GO:0044446;GO:0044444;GO:0005739;GO:0043229;GO:0005623;GO:0005622;GO:0043226;GO:0005759;GO:0005575;GO:0070013;	membrane-enclosed lumen;intracellular membrane-bounded organelle;organelle lumen;mitochondrial part;intracellular part;organelle part;cell part;membrane-bounded organelle;cytoplasm;intracellular organelle part;cytoplasmic part;mitochondrion;intracellular organelle;cell;intracellular;organelle;mitochondrial matrix;cellular_component;intracellular organelle lumen;	2;4;3;4;3;2;2;3;4;3;4;5;3;2;3;2;5;1;4;	GO:0016740;GO:0003674;GO:0005488;GO:0016782;GO:0003824;GO:0008410;GO:0046983;GO:0042802;GO:0042803;GO:0005515;GO:0008260;	transferase activity;molecular_function;binding;transferase activity, transferring sulfur-containing groups;catalytic activity;CoA-transferase activity;protein dimerization activity;identical protein binding;protein homodimerization activity;protein binding;3-oxoacid CoA-transferase activity;	3;1;2;4;2;5;4;4;5;3;6;	K01027	map00072;map00280;map00650;	Synthesis and degradation of ketone bodies;"Valine, leucine and isoleucine degradation";Butanoate metabolism;	IPR012791;IPR004164;IPR012792;IPR014388;IPR004165;	3-oxoacid CoA-transferase, subunit B;Coenzyme A transferase active site;3-oxoacid CoA-transferase, subunit A;3-oxoacid CoA-transferase;Coenzyme A transferase family I;	mitochondria	Hs4557817	542	C	[C] Energy production and conversion;
T4ZYZ0	Dihydroxyacetone kinase OS=Ophiocordyceps sinensis (strain Co18 / CGMCC 3.14243) OX=911162 GN=OCS_05927 PE=4 SV=1	up	nan	nan	2.001	1.869	nan	nan	0.653	0.742	nan	nan	0.704	0.701	2.77416	0.00411203	0.99288	0.920844	2.75445	0.00285676	GO:0016052;GO:0046174;GO:0019751;GO:0044248;GO:0044281;GO:0044282;GO:0044699;GO:0044237;GO:0006066;GO:0044710;GO:0044262;GO:0071704;GO:0019563;GO:0019405;GO:0019400;GO:0006071;GO:0044712;GO:0046164;GO:0044238;GO:1901575;GO:0044763;GO:0008152;GO:0044723;GO:0009056;GO:0044724;GO:0044275;GO:0005975;GO:0008150;GO:0009987;GO:1901616;GO:1901615;	carbohydrate catabolic process;polyol catabolic process;polyol metabolic process;cellular catabolic process;small molecule metabolic process;small molecule catabolic process;single-organism process;cellular metabolic process;alcohol metabolic process;single-organism metabolic process;cellular carbohydrate metabolic process;organic substance metabolic process;glycerol catabolic process;alditol cat…	5;7;6;4;4;5;2;3;5;3;4;3;6;5;4;5;4;6;3;4;3;2;4;3;5;5;4;1;2;5;4;	GO:0005737;GO:0005829;GO:0044464;GO:0005623;GO:0005622;GO:0005575;GO:0044444;GO:0044424;	cytoplasm;cytosol;cell part;cell;intracellular;cellular_component;cytoplasmic part;intracellular part;	4;5;2;2;3;1;4;3;	GO:0005488;GO:1901363;GO:0035639;GO:0003674;GO:0001883;GO:0043168;GO:0032549;GO:0043167;GO:0016740;GO:1901265;GO:0050354;GO:0001882;GO:0005524;GO:0000166;GO:0016301;GO:0036094;GO:0003824;GO:0017076;GO:0032555;GO:0004371;GO:0030554;GO:0016773;GO:0016772;GO:0097367;GO:0032559;GO:0097159;GO:0032550;GO:0032553;	binding;heterocyclic compound binding;purine ribonucleoside triphosphate binding;molecular_function;purine nucleoside binding;anion binding;ribonucleoside binding;ion binding;transferase activity;nucleoside phosphate binding;triokinase activity;nucleoside binding;ATP binding;nucleotide binding;kinase activity;small molecule binding;catalytic activity;purine nucleotide binding;purine ribonucleotid…	2;3;5;1;5;4;5;3;3;4;6;4;6;4;5;3;2;5;5;6;6;5;4;3;6;3;6;4;	K00863	map00051;map00561;map00680;map01100;map01120;map01200;map04622;	Fructose and mannose metabolism;Glycerolipid metabolism;Methane metabolism;Metabolic pathways;Microbial metabolism in diverse environments;Carbon metabolism;RIG-I-like receptor signaling pathway;	IPR004006;IPR004007;	DhaK domain;DhaL domain;	cytosol	SPAC22A12.11	271	G	[G] Carbohydrate transport and metabolism;
T5ADW8	Uncharacterized protein OS=Ophiocordyceps sinensis (strain Co18 / CGMCC 3.14243) OX=911162 GN=OCS_04346 PE=4 SV=1	up	2.785	2.181	2.675	2.862	1.295	1.123	1.078	0.296	0.408	0.47	0.304	0.598	2.76978	0.000801101	2.13034	0.0719705	5.90056	1.15879e-05															extracellular
T5AAJ2	Translation initiation factor RLI1 OS=Ophiocordyceps sinensis (strain Co18 / CGMCC 3.14243) OX=911162 GN=OCS_05461 PE=4 SV=1	up	2.196	1.793	nan	nan	0.726	0.716	nan	nan	0.78	0.642	nan	nan	2.76633	0.024147	1.01406	0.898319	2.8052	0.0264491	GO:0044237;GO:0090304;GO:0034641;GO:0006807;GO:0034660;GO:0043170;GO:1901360;GO:0006139;GO:0044260;GO:0042254;GO:0071704;GO:0010467;GO:0071840;GO:0022613;GO:0046483;GO:0006364;GO:0009987;GO:0034470;GO:0006810;GO:0006725;GO:0008150;GO:0008152;GO:0051234;GO:0051179;GO:0016070;GO:0044238;GO:0016072;GO:0044085;GO:0006396;	cellular metabolic process;nucleic acid metabolic process;cellular nitrogen compound metabolic process;nitrogen compound metabolic process;ncRNA metabolic process;macromolecule metabolic process;organic cyclic compound metabolic process;nucleobase-containing compound metabolic process;cellular macromolecule metabolic process;ribosome biogenesis;organic substance metabolic process;gene expression;…	3;5;4;3;6;4;4;4;4;5;3;5;2;4;4;6;2;7;4;4;1;2;3;2;5;3;7;3;6;	GO:0043227;GO:0043226;GO:0005737;GO:0005634;GO:0043231;GO:0044464;GO:0043229;GO:0005623;GO:0005622;GO:0005575;GO:0044424;	membrane-bounded organelle;organelle;cytoplasm;nucleus;intracellular membrane-bounded organelle;cell part;intracellular organelle;cell;intracellular;cellular_component;intracellular part;	3;2;4;5;4;2;3;2;3;1;3;	GO:0003676;GO:0035639;GO:0008135;GO:1901363;GO:0016817;GO:0003674;GO:0005488;GO:0016887;GO:0001883;GO:0001882;GO:0051540;GO:0043167;GO:0032555;GO:0032549;GO:0017076;GO:0005524;GO:0016787;GO:0043169;GO:0000166;GO:0016818;GO:1901265;GO:0017111;GO:0036094;GO:0003824;GO:0046872;GO:0051539;GO:0032550;GO:0030554;GO:0097367;GO:0097159;GO:0051536;GO:0016462;GO:0032559;GO:0032553;GO:0003723;GO:0043168;GO:…	nucleic acid binding;purine ribonucleoside triphosphate binding;translation factor activity, RNA binding;heterocyclic compound binding;hydrolase activity, acting on acid anhydrides;molecular_function;binding;ATPase activity;purine nucleoside binding;nucleoside binding;metal cluster binding;ion binding;purine ribonucleotide binding;ribonucleoside binding;purine nucleotide binding;ATP binding;hydro…	4;5;6;3;4;1;2;8;5;4;3;3;5;5;5;6;3;4;4;5;4;7;3;2;5;5;6;6;3;3;4;6;6;4;5;4;7;	K06174			IPR017871;IPR017900;IPR003593;IPR003439;IPR017896;IPR007209;IPR034348;IPR013283;IPR027417;	ABC transporter, conserved site;4Fe-4S ferredoxin, iron-sulphur binding, conserved site;AAA+ ATPase domain;ABC transporter-like;4Fe-4S ferredoxin-type, iron-sulphur binding domain;RNase L inhibitor RLI, possible metal-binding domain;RLI, domain 1;RLI1;P-loop containing nucleoside triphosphate hydrolase;	mitochondria	YDR091c	947	A	[A] RNA processing and modification;
T5AMV9	Peptidase M60 domain-containing protein OS=Ophiocordyceps sinensis (strain Co18 / CGMCC 3.14243) OX=911162 GN=OCS_01187 PE=4 SV=1	up	2.258	1.426	2.393	1.328	0.502	0.813	0.395	0.973	1.205	1.098	0.71	0.939	2.75999	0.00848443	0.6789	0.114652	1.87373	0.0268076													IPR031161;	Peptidase family M60 domain;	nucleus	449090446	73.2	G	[G] Carbohydrate transport and metabolism;	COG3979	Chitodextrinase
T4ZXQ6	Serine protease OS=Ophiocordyceps sinensis (strain Co18 / CGMCC 3.14243) OX=911162 GN=OCS_06361 PE=3 SV=1	up	2.779	1.983	1.196	1.608	0.556	0.671	0.843	0.677	0.761	0.582	0.892	0.613	2.75429	0.012448	0.96454	0.794685	2.6566	0.0140251				GO:0005575;GO:0005576;	cellular_component;extracellular region;	1;2;	GO:0004252;GO:0004175;GO:0017171;GO:0016787;GO:0003824;GO:0070011;GO:0003674;GO:0008233;GO:0008236;	serine-type endopeptidase activity;endopeptidase activity;serine hydrolase activity;hydrolase activity;catalytic activity;peptidase activity, acting on L-amino acid peptides;molecular_function;peptidase activity;serine-type peptidase activity;	6;6;4;3;2;5;1;4;5;				IPR010259;IPR034193;IPR000209;IPR023827;IPR022398;IPR009020;IPR015500;	Peptidase S8 propeptide/proteinase inhibitor I9;Proteinase K-like catalytic domain;Peptidase S8/S53 domain;Peptidase S8, subtilisin, Asp-active site;Peptidase S8, subtilisin, His-active site;Protease propeptides/proteinase inhibitor I9;Peptidase S8, subtilisin-related;	extracellular	SPAC4A8.04	241	O	[O] Posttranslational modification, protein turnover, chaperones;
T5AKR3	Cellobiose dehydrogenase OS=Ophiocordyceps sinensis (strain Co18 / CGMCC 3.14243) OX=911162 GN=OCS_01858 PE=4 SV=1	up	2.131	1.66	2.122	1.676	0.649	0.762	0.695	0.652	0.797	0.817	0.49	0.676	2.75164	0.000108916	0.99209	0.947149	2.72986	0.000218478										K02141	map00190;map01100;	Oxidative phosphorylation;Metabolic pathways;	IPR019711;	ATP synthase, F0 complex, subunit H;	mitochondria
T5APK1	Microcystin LR degradation protein MlrC OS=Ophiocordyceps sinensis (strain Co18 / CGMCC 3.14243) OX=911162 GN=OCS_00641 PE=4 SV=1	up	1.789	2.117	2.567	1.661	0.856	0.712	0.603	0.787	1.094	0.797	0.728	0.873	2.74982	0.000822365	0.84708	0.214208	2.32932	0.0017536													IPR009197;IPR010799;IPR015995;	Microcystin LR degradation protein MlrC;Microcystin LR degradation protein MlrC, C-terminal;Microcystin LR degradation protein MlrC, N-terminal;	mitochondria	374992285	629	R	[R] General function prediction only;	COG5476	Microcystin degradation protein MlrC, contains DUF1485 domain
T5AF78	Glucoamylase OS=Ophiocordyceps sinensis (strain Co18 / CGMCC 3.14243) OX=911162 GN=OCS_03793 PE=3 SV=1	up	1.741	2.208	1.358	1.554	0.576	0.528	0.784	0.619	0.717	0.627	0.901	0.633	2.73673	0.001235	0.87109	0.31553	2.38395	0.00208543	GO:0043170;GO:1901575;GO:0071704;GO:0008150;GO:0008152;GO:0000272;GO:0009056;GO:0009057;GO:0044238;GO:0005975;GO:0005976;GO:0016052;	macromolecule metabolic process;organic substance catabolic process;organic substance metabolic process;biological_process;metabolic process;polysaccharide catabolic process;catabolic process;macromolecule catabolic process;primary metabolic process;carbohydrate metabolic process;polysaccharide metabolic process;carbohydrate catabolic process;	4;4;3;1;2;6;3;5;3;4;5;5;	GO:0000324;GO:0000323;GO:0000322;GO:0044464;GO:0043229;GO:0043227;GO:0043226;GO:0005737;GO:0005773;GO:0043231;GO:0005623;GO:0005622;GO:0005575;GO:0044444;GO:0044424;	fungal-type vacuole;lytic vacuole;storage vacuole;cell part;intracellular organelle;membrane-bounded organelle;organelle;cytoplasm;vacuole;intracellular membrane-bounded organelle;cell;intracellular;cellular_component;cytoplasmic part;intracellular part;	7;6;6;2;3;3;2;4;5;4;2;3;1;4;3;	GO:0016787;GO:0030247;GO:0016798;GO:0003674;GO:0005488;GO:2001070;GO:0015926;GO:0030246;GO:0003824;GO:0001871;GO:0004553;GO:0004339;	hydrolase activity;polysaccharide binding;hydrolase activity, acting on glycosyl bonds;molecular_function;binding;starch binding;glucosidase activity;carbohydrate binding;catalytic activity;pattern binding;hydrolase activity, hydrolyzing O-glycosyl compounds;glucan 1,4-alpha-glucosidase activity;	3;4;4;1;2;5;6;3;2;3;5;7;	K01178	map00500;map01100;	Starch and sucrose metabolism;Metabolic pathways;	IPR013783;IPR013784;IPR034836;IPR000165;IPR008291;IPR002044;IPR011613;IPR008928;	Immunoglobulin-like fold;Carbohydrate-binding-like fold;Glucoamylase, CBM20 domain;Glucoamylase;Glucoamylase, starch-binding;Carbohydrate binding module family 20;Glycoside hydrolase family 15/Phosphorylase b kinase regulatory chain family;Six-hairpin glycosidase-like;	extracellular	217976594	138	G	[G] Carbohydrate transport and metabolism;	COG3387	Glucoamylase (glucan-1,4-alpha-glucosidase), GH15 family
T5A7V8	Diphthamide synthesis, DPH1/DHP2 OS=Ophiocordyceps sinensis (strain Co18 / CGMCC 3.14243) OX=911162 GN=OCS_06393 PE=3 SV=1	up	nan	1.759	1.527	1.513	nan	0.629	0.628	0.508	nan	0.664	0.491	0.763	2.71902	0.000346702	0.92023	0.597516	2.50209	0.00103739	GO:0080090;GO:0019222;GO:0051246;GO:0031326;GO:0031323;GO:0044249;GO:0034641;GO:0006807;GO:0034645;GO:0018202;GO:0050789;GO:0044699;GO:0044267;GO:0044710;GO:0044711;GO:0044260;GO:0010608;GO:0043043;GO:0018193;GO:0071704;GO:0010467;GO:0010556;GO:0065007;GO:2000765;GO:2000112;GO:0010468;GO:1901576;GO:0060255;GO:0009987;GO:0009889;GO:0006464;GO:0050794;GO:0002181;GO:0043412;GO:0036211;GO:0008150;GO:…	regulation of primary metabolic process;regulation of metabolic process;regulation of protein metabolic process;regulation of cellular biosynthetic process;regulation of cellular metabolic process;cellular biosynthetic process;cellular nitrogen compound metabolic process;nitrogen compound metabolic process;cellular macromolecule biosynthetic process;peptidyl-histidine modification;regulation of b…	4;3;5;5;4;4;4;3;5;8;2;2;5;3;4;4;6;6;7;3;5;5;2;7;6;5;4;4;2;4;6;3;7;5;5;1;4;2;4;5;6;3;5;5;5;5;4;9;3;3;4;4;5;6;3;5;6;	GO:0043231;GO:0005623;GO:0044424;GO:0043227;GO:0005737;GO:0005634;GO:0043226;GO:0005622;GO:0043229;GO:0005829;GO:0044464;GO:0005575;GO:0044444;	intracellular membrane-bounded organelle;cell;intracellular part;membrane-bounded organelle;cytoplasm;nucleus;organelle;intracellular;intracellular organelle;cytosol;cell part;cellular_component;cytoplasmic part;	4;2;3;3;4;5;2;3;3;5;2;1;4;				K07561			IPR016435;IPR001377;	Diphthamide synthesis DPH1/DPH2;Ribosomal protein S6e;	cytosol	Hs4503361	141	J	[J] Translation, ribosomal structure and biogenesis;
T5A6E8	Ribosomal protein S17 OS=Ophiocordyceps sinensis (strain Co18 / CGMCC 3.14243) OX=911162 GN=OCS_06306 PE=3 SV=1	up	2.345	1.675	2.18	1.338	0.605	0.696	0.627	0.848	0.57	0.598	0.549	0.677	2.7154	0.00243232	1.15957	0.172123	3.14871	0.00148723	GO:0071840;GO:0043043;GO:0006364;GO:0034470;GO:0000462;GO:0046483;GO:1901564;GO:1901566;GO:0019538;GO:0022607;GO:0000028;GO:0006807;GO:0034660;GO:0044267;GO:0044260;GO:0042255;GO:0042254;GO:0016043;GO:0065003;GO:1901360;GO:0008150;GO:0008152;GO:0016070;GO:0016072;GO:0044271;GO:0006518;GO:0044249;GO:0034641;GO:0034645;GO:0006139;GO:0042274;GO:0022618;GO:0022613;GO:0009987;GO:0006725;GO:0002181;GO:…	cellular component organization or biogenesis;peptide biosynthetic process;rRNA processing;ncRNA processing;maturation of SSU-rRNA from tricistronic rRNA transcript (SSU-rRNA, 5.8S rRNA, LSU-rRNA);heterocycle metabolic process;organonitrogen compound metabolic process;organonitrogen compound biosynthetic process;protein metabolic process;cellular component assembly;ribosomal small subunit assembl…	2;6;6;7;7;4;4;5;4;4;6;3;6;5;4;6;5;3;5;4;1;2;5;7;5;5;4;4;5;4;5;5;4;2;4;7;6;5;6;4;4;5;6;5;3;5;4;3;5;5;4;3;3;3;6;6;	GO:0022626;GO:0022627;GO:0043232;GO:0005829;GO:0044424;GO:0044422;GO:0044464;GO:0043229;GO:0005622;GO:0043226;GO:0005840;GO:0044446;GO:0044444;GO:0044445;GO:0015935;GO:0005737;GO:0044391;GO:1990904;GO:0005623;GO:0043228;GO:0030529;GO:0032991;GO:0005575;	cytosolic ribosome;cytosolic small ribosomal subunit;intracellular non-membrane-bounded organelle;cytosol;intracellular part;organelle part;cell part;intracellular organelle;intracellular;organelle;ribosome;intracellular organelle part;cytoplasmic part;cytosolic part;small ribosomal subunit;cytoplasm;ribosomal subunit;ribonucleoprotein complex;cell;non-membrane-bounded organelle;intracellular rib…	6;6;4;5;3;2;2;3;3;2;5;3;4;5;5;4;4;3;2;3;4;2;1;	GO:0005198;GO:1901363;GO:0003674;GO:0005488;GO:0003676;GO:0097159;GO:0003723;GO:0003735;GO:0019843;	structural molecule activity;heterocyclic compound binding;molecular_function;binding;nucleic acid binding;organic cyclic compound binding;RNA binding;structural constituent of ribosome;rRNA binding;	2;3;1;2;4;3;5;3;6;	K02949	map03010;	Ribosome;	IPR000266;IPR019979;IPR012340;IPR028333;IPR032440;	Ribosomal protein S17/S11;Ribosomal protein S17, conserved site;Nucleic acid-binding, OB-fold;Ribosomal protein S17, archaeal/eukaryotic;40S ribosomal protein S11, N-terminal;	mitochondria	YDR025w	258	J	[J] Translation, ribosomal structure and biogenesis;
T5ACF2	Dienelactone hydrolase OS=Ophiocordyceps sinensis (strain Co18 / CGMCC 3.14243) OX=911162 GN=OCS_04768 PE=4 SV=1	up	2.534	2.176	2.451	1.631	0.746	0.892	0.702	0.933	0.711	0.529	0.497	0.641	2.68622	0.000617339	1.37637	0.0240916	3.69722	0.000262188													IPR002925;IPR029058;	Dienelactone hydrolase;Alpha/Beta hydrolase fold;	cytosol	At3g23600	77	R	[R] General function prediction only;
T5AE94	Oxoglutarate/iron-dependent oxygenase OS=Ophiocordyceps sinensis (strain Co18 / CGMCC 3.14243) OX=911162 GN=OCS_03551 PE=3 SV=1	up	2.484	2.009	1.578	1.326	0.516	0.601	0.895	0.742	0.891	0.841	0.802	0.924	2.68593	0.00487977	0.79641	0.0906197	2.1391	0.00844599													IPR026992;IPR005123;IPR027443;	Non-haem dioxygenase N-terminal domain;Oxoglutarate/iron-dependent dioxygenase;Isopenicillin N synthase-like;	cytosol, nucleus	261855465	72.8	Q	[Q] Secondary metabolites biosynthesis, transport and catabolism;	COG3491	Isopenicillin N synthase and related dioxygenases
T5A6X3	Uncharacterized protein OS=Ophiocordyceps sinensis (strain Co18 / CGMCC 3.14243) OX=911162 GN=OCS_05938 PE=4 SV=1	up	1.53	1.783	2.415	1.496	0.755	0.71	0.571	0.663	1.422	1.09	0.753	1.148	2.67652	0.0019646	0.6116	0.0240506	1.63698	0.0322516										K09702			IPR009784;	Protein of unknown function DUF1349;	cytosol	428225376	62.4	S	[S] Function unknown;	COG3506	Regulation of enolase protein 1 (function unknown), concanavalin A-like superfamily
T5ABC4	Uncharacterized protein OS=Ophiocordyceps sinensis (strain Co18 / CGMCC 3.14243) OX=911162 GN=OCS_04393 PE=4 SV=1	up	1.817	1.362	2.017	1.028	0.388	0.578	0.709	0.658	0.774	0.675	0.543	1.226	2.6678	0.00595432	0.72498	0.226337	1.93412	0.0309241															mitochondria
T5A8F6	Zinc knuckle domain protein OS=Ophiocordyceps sinensis (strain Co18 / CGMCC 3.14243) OX=911162 GN=OCS_05419 PE=4 SV=1	up	2.337	2.016	2.432	1.352	0.659	0.585	0.89	0.932	1.077	0.8	0.469	1.059	2.65393	0.00270706	0.90044	0.627566	2.38972	0.00577644				GO:0043231;GO:0005634;GO:0044464;GO:0005623;GO:0005622;GO:0005575;GO:0043229;GO:0044424;GO:0043227;GO:0043226;	intracellular membrane-bounded organelle;nucleus;cell part;cell;intracellular;cellular_component;intracellular organelle;intracellular part;membrane-bounded organelle;organelle;	4;5;2;2;3;1;3;3;3;2;	GO:0043169;GO:0046872;GO:0046914;GO:0097159;GO:0003674;GO:0005488;GO:0003676;GO:0003677;GO:0043167;GO:1901363;GO:0008270;	cation binding;metal ion binding;transition metal ion binding;organic cyclic compound binding;molecular_function;binding;nucleic acid binding;DNA binding;ion binding;heterocyclic compound binding;zinc ion binding;	4;5;6;3;1;2;4;5;3;3;7;	K09250			IPR001878;	Zinc finger, CCHC-type;	nucleus	SPAC13D6.02c	121	O	[O] Posttranslational modification, protein turnover, chaperones;
T5A7Q8	Threonine-tRNA ligase OS=Ophiocordyceps sinensis (strain Co18 / CGMCC 3.14243) OX=911162 GN=OCS_06516 PE=3 SV=1	up	1.745	1.488	2.675	2.061	0.831	0.902	0.556	0.718	0.83	0.774	0.487	0.627	2.65013	0.00350934	1.10633	0.528019	2.93194	0.00268272	GO:0006435;GO:0044237;GO:0019752;GO:0090304;GO:0044249;GO:0034641;GO:0006807;GO:0044281;GO:0034645;GO:0034660;GO:0043170;GO:1901360;GO:0006139;GO:0044710;GO:0044260;GO:0006520;GO:0043043;GO:0071704;GO:0010467;GO:0043604;GO:0044699;GO:0002181;GO:0044267;GO:0009987;GO:0006725;GO:0009058;GO:0009059;GO:0008150;GO:0008152;GO:0043436;GO:0044271;GO:0046483;GO:0016070;GO:0044238;GO:0006418;GO:1901564;GO:…	threonyl-tRNA aminoacylation;cellular metabolic process;carboxylic acid metabolic process;nucleic acid metabolic process;cellular biosynthetic process;cellular nitrogen compound metabolic process;nitrogen compound metabolic process;small molecule metabolic process;cellular macromolecule biosynthetic process;ncRNA metabolic process;macromolecule metabolic process;organic cyclic compound metabolic …	8;3;6;5;4;4;3;4;5;6;4;4;4;3;4;4;6;3;5;6;2;7;5;2;4;3;5;1;2;5;5;4;5;3;7;4;5;4;4;7;5;6;5;4;3;5;6;	GO:0005737;GO:0044444;GO:0005829;GO:0044464;GO:0005623;GO:0005622;GO:0005575;GO:0044424;	cytoplasm;cytoplasmic part;cytosol;cell part;cell;intracellular;cellular_component;intracellular part;	4;4;5;2;2;3;1;3;	GO:0032550;GO:0035639;GO:0003674;GO:1901363;GO:0001882;GO:0004812;GO:0097367;GO:0043167;GO:0032555;GO:0032549;GO:0017076;GO:0005524;GO:0043168;GO:0000166;GO:0001883;GO:1901265;GO:0036094;GO:0003824;GO:0016874;GO:0016875;GO:0016876;GO:0030554;GO:0097159;GO:0004829;GO:0032559;GO:0032553;GO:0005488;	purine ribonucleoside binding;purine ribonucleoside triphosphate binding;molecular_function;heterocyclic compound binding;nucleoside binding;aminoacyl-tRNA ligase activity;carbohydrate derivative binding;ion binding;purine ribonucleotide binding;ribonucleoside binding;purine nucleotide binding;ATP binding;anion binding;nucleotide binding;purine nucleoside binding;nucleoside phosphate binding;smal…	6;5;1;3;4;6;3;3;5;5;5;6;4;4;5;4;3;2;3;4;5;6;3;7;6;4;2;	K01868	map00970;	Aminoacyl-tRNA biosynthesis;	IPR004095;IPR033728;IPR018163;IPR004154;IPR002314;IPR006195;IPR012947;IPR012676;IPR002320;IPR012675;	TGS;Threonine-tRNA ligase catalytic core domain;Threonyl/alanyl tRNA synthetase, class II-like, putative editing domain;Anticodon-binding;Aminoacyl-tRNA synthetase, class II (G/ P/ S/T);Aminoacyl-tRNA synthetase, class II;Threonyl/alanyl tRNA synthetase, SAD;TGS-like;Threonine-tRNA ligase, class IIa;Beta-grasp domain;	cytosol	SPBC25H2.02	922	J	[J] Translation, ribosomal structure and biogenesis;
T5ALP0	GTP-binding protein YchF OS=Ophiocordyceps sinensis (strain Co18 / CGMCC 3.14243) OX=911162 GN=OCS_01633 PE=4 SV=1	up	2.697	1.687	1.774	1.546	0.65	0.661	0.812	0.789	0.678	0.74	0.802	0.987	2.64557	0.00398828	0.90801	0.386278	2.40225	0.00588281													IPR012676;IPR013029;IPR012675;	TGS-like;Domain of unknown function DUF933;Beta-grasp domain;	mitochondria	YBR025c	116	R	[R] General function prediction only;
T5APZ3	Flavin-binding monooxygenase-like protein OS=Ophiocordyceps sinensis (strain Co18 / CGMCC 3.14243) OX=911162 GN=OCS_00492 PE=4 SV=1	up	2.503	2.464	1.703	0.784	0.706	0.584	0.648	0.886	0.69	0.581	0.84	1.029	2.6395	0.0300636	0.89936	0.524183	2.37389	0.0409737															extracellular
T5APU0	Glycoside hydrolase family 16 protein OS=Ophiocordyceps sinensis (strain Co18 / CGMCC 3.14243) OX=911162 GN=OCS_00552 PE=4 SV=1	up	2.179	1.991	2.547	1.22	0.849	0.692	0.528	0.95	1.008	0.811	0.551	0.756	2.62902	0.00585111	0.96577	0.845823	2.53903	0.00652886													IPR013320;IPR000757;	Concanavalin A-like lectin/glucanase domain;Glycoside hydrolase family 16;	extracellular
T5AB50	Protein import receptor MAS20-related protein OS=Ophiocordyceps sinensis (strain Co18 / CGMCC 3.14243) OX=911162 GN=OCS_01608 PE=3 SV=1	up	nan	1.856	nan	1.824	nan	0.663	nan	0.746	nan	0.622	nan	0.883	2.61178	0.00153077	0.93621	0.759425	2.44518	0.0143036	GO:0008104;GO:0061024;GO:0007008;GO:0007006;GO:0071840;GO:0070727;GO:0033036;GO:0045184;GO:0072655;GO:0006839;GO:0070585;GO:0022607;GO:0006886;GO:0016043;GO:0065003;GO:0065002;GO:0007005;GO:0006461;GO:0006626;GO:0006810;GO:0051031;GO:0008150;GO:0071806;GO:0051234;GO:0050658;GO:0046907;GO:0050657;GO:0072594;GO:0035927;GO:0044802;GO:0015931;GO:0070271;GO:0030150;GO:0051236;GO:0044699;GO:0017038;GO:…	protein localization;membrane organization;outer mitochondrial membrane organization;mitochondrial membrane organization;cellular component organization or biogenesis;cellular macromolecule localization;macromolecule localization;establishment of protein localization;establishment of protein localization to mitochondrion;mitochondrial transport;protein localization to mitochondrion;cellular compo…	4;4;6;5;2;4;3;4;6;6;7;4;6;3;5;6;5;5;5;4;5;1;5;3;5;5;7;5;6;4;6;4;5;4;2;5;4;6;6;4;7;6;5;5;5;5;4;2;5;4;3;4;6;6;2;3;3;4;4;3;6;5;5;4;	GO:0098573;GO:0031975;GO:0031224;GO:0016021;GO:0016020;GO:0031968;GO:0098588;GO:0031967;GO:0031966;GO:0043234;GO:0043231;GO:0044429;GO:0044424;GO:0044425;GO:0044422;GO:0043229;GO:0043227;GO:0043226;GO:0044446;GO:0044444;GO:0031307;GO:0031306;GO:0031301;GO:0031300;GO:0005737;GO:0031090;GO:0005739;GO:0044455;GO:0044464;GO:0019867;GO:0005623;GO:0005622;GO:0005742;GO:0005740;GO:0005741;GO:0032592;GO:…	intrinsic component of mitochondrial membrane;envelope;intrinsic component of membrane;integral component of membrane;membrane;organelle outer membrane;bounding membrane of organelle;organelle envelope;mitochondrial membrane;protein complex;intracellular membrane-bounded organelle;mitochondrial part;intracellular part;membrane part;organelle part;intracellular organelle;membrane-bounded organelle…	4;3;3;4;2;4;4;4;4;3;4;4;3;2;2;3;3;2;3;4;6;5;4;3;4;3;5;3;2;3;2;3;5;5;5;5;3;2;1;3;4;4;	GO:0015399;GO:0015405;GO:0003674;GO:0005488;GO:0008565;GO:0022884;GO:0022804;GO:0022891;GO:0030943;GO:0042277;GO:0015450;GO:0033218;GO:0008320;GO:0022892;GO:0022857;GO:0005215;GO:0005048;	primary active transmembrane transporter activity;P-P-bond-hydrolysis-driven transmembrane transporter activity;molecular_function;binding;protein transporter activity;macromolecule transmembrane transporter activity;active transmembrane transporter activity;substrate-specific transmembrane transporter activity;mitochondrion targeting sequence binding;peptide binding;P-P-bond-hydrolysis-driven pr…	5;6;1;2;4;5;4;4;6;4;6;3;5;3;3;2;5;	K17770			IPR023392;IPR002056;	Mitochondrial outer membrane translocase complex, subunit Tom20 domain;Protein import receptor MAS20;	extracellular	SPAC6F12.07	102	U	[U] Intracellular trafficking, secretion, and vesicular transport;
T5A9X7	Uncharacterized protein OS=Ophiocordyceps sinensis (strain Co18 / CGMCC 3.14243) OX=911162 GN=OCS_02019 PE=4 SV=1	up	2.23	nan	nan	1.821	0.797	nan	nan	0.772	0.773	nan	nan	0.651	2.58191	0.02619	1.10183	0.364396	2.8448	0.0253952															nucleus
T5AIM3	1,3-beta-glucanosyltransferase OS=Ophiocordyceps sinensis (strain Co18 / CGMCC 3.14243) OX=911162 GN=OCS_02617 PE=3 SV=1	up	1.848	1.239	2.03	1.461	0.63	0.727	0.509	0.699	0.868	0.934	0.707	0.771	2.5645	0.00168679	0.78201	0.0432499	2.00549	0.00449736	GO:0071840;GO:0071704;GO:0016043;GO:0071554;GO:0071555;GO:0009987;GO:0008150;GO:0008152;GO:0044238;GO:0005975;GO:0045229;	cellular component organization or biogenesis;organic substance metabolic process;cellular component organization;cell wall organization or biogenesis;cell wall organization;cellular process;biological_process;metabolic process;primary metabolic process;carbohydrate metabolic process;external encapsulating structure organization;	2;3;3;3;4;2;1;2;3;4;4;	GO:0071944;GO:0031225;GO:0005618;GO:0016020;GO:0031224;GO:0044425;GO:0030312;GO:0005886;GO:0044464;GO:0005623;GO:0005575;GO:0005576;	cell periphery;anchored component of membrane;cell wall;membrane;intrinsic component of membrane;membrane part;external encapsulating structure;plasma membrane;cell part;cell;cellular_component;extracellular region;	3;4;4;2;3;2;3;3;2;2;1;2;	GO:0003674;GO:0016740;GO:0003824;	molecular_function;transferase activity;catalytic activity;	1;3;2;	K22832			IPR004886;IPR017853;IPR012946;	Glucanosyltransferase;Glycoside hydrolase superfamily;X8 domain;	extracellular
T5ADA1	Glucosidase 2 subunit beta OS=Ophiocordyceps sinensis (strain Co18 / CGMCC 3.14243) OX=911162 GN=OCS_03890 PE=4 SV=1	up	2.101	1.893	2.194	1.48	0.792	0.747	0.669	0.804	0.88	0.714	0.567	0.743	2.54582	0.000362401	1.03719	0.717171	2.6405	0.000437431	GO:0043413;GO:0009311;GO:0044249;GO:0044237;GO:0034645;GO:1901576;GO:0043170;GO:0044699;GO:0044710;GO:0006486;GO:0006487;GO:0009100;GO:0009101;GO:0044267;GO:0009987;GO:0070085;GO:0006464;GO:0044260;GO:0071704;GO:0043412;GO:0036211;GO:0008150;GO:0008152;GO:0044723;GO:0005975;GO:0044238;GO:0006491;GO:0019538;GO:1901135;GO:0009058;GO:1901137;GO:0009059;GO:0044763;	macromolecule glycosylation;oligosaccharide metabolic process;cellular biosynthetic process;cellular metabolic process;cellular macromolecule biosynthetic process;organic substance biosynthetic process;macromolecule metabolic process;single-organism process;single-organism metabolic process;protein glycosylation;protein N-linked glycosylation;glycoprotein metabolic process;glycoprotein biosynthet…	6;5;4;3;5;4;4;2;3;4;5;5;6;5;2;5;6;4;3;5;5;1;2;4;4;3;6;4;4;3;5;5;3;	GO:0005783;GO:0043229;GO:0043227;GO:0043226;GO:0005737;GO:0005575;GO:0044432;GO:0017177;GO:0012505;GO:0043234;GO:0032991;GO:0043231;GO:0044464;GO:0005623;GO:0005622;GO:0044446;GO:0044444;GO:0044424;GO:0044422;	endoplasmic reticulum;intracellular organelle;membrane-bounded organelle;organelle;cytoplasm;cellular_component;endoplasmic reticulum part;glucosidase II complex;endomembrane system;protein complex;macromolecular complex;intracellular membrane-bounded organelle;cell part;cell;intracellular;intracellular organelle part;cytoplasmic part;intracellular part;organelle part;	4;3;3;2;4;1;4;4;3;3;2;4;2;2;3;3;4;3;2;				K08288	map04141;	Protein processing in endoplasmic reticulum;	IPR026874;IPR009011;IPR028146;	Glucosidase 2 subunit beta;Mannose-6-phosphate receptor binding domain;Glucosidase II beta subunit, N-terminal;	nucleus	SPCC825.02	193	T	[T] Signal transduction mechanisms;
T4ZYY4	Cyclopropane-fatty-acyl-phospholipid synthase OS=Ophiocordyceps sinensis (strain Co18 / CGMCC 3.14243) OX=911162 GN=OCS_05932 PE=4 SV=1	up	1.893	1.854	2.452	1.636	0.82	0.748	0.611	0.905	1.042	0.658	0.455	0.479	2.54052	0.00066786	1.17084	0.479422	2.97456	0.00105633	GO:0006807;GO:0006629;GO:0044710;GO:0071704;GO:0044699;GO:0006665;GO:0006643;GO:0009987;GO:0044763;GO:0008152;GO:0044255;GO:0044238;GO:1901564;GO:0044237;GO:0008150;	nitrogen compound metabolic process;lipid metabolic process;single-organism metabolic process;organic substance metabolic process;single-organism process;sphingolipid metabolic process;membrane lipid metabolic process;cellular process;single-organism cellular process;metabolic process;cellular lipid metabolic process;primary metabolic process;organonitrogen compound metabolic process;cellular met…	3;4;3;3;2;5;5;2;3;2;4;3;4;3;1;	GO:0031224;GO:0016021;GO:0016020;GO:0044425;GO:0005575;	intrinsic component of membrane;integral component of membrane;membrane;membrane part;cellular_component;	3;4;2;2;1;	GO:0003674;GO:0008168;GO:0016740;GO:0016741;GO:0003824;	molecular_function;methyltransferase activity;transferase activity;transferase activity, transferring one-carbon groups;catalytic activity;	1;5;3;4;2;	K20238			IPR029063;	S-adenosyl-L-methionine-dependent methyltransferase;	endoplasmic reticulum	392402486	343	I	[I] Lipid transport and metabolism;	COG2230	Cyclopropane fatty-acyl-phospholipid synthase and related methyltransferases
T5AN41	Guanine nucleotide exchange factor-like protein OS=Ophiocordyceps sinensis (strain Co18 / CGMCC 3.14243) OX=911162 GN=OCS_01139 PE=4 SV=1	up	2.424	1.706	1.564	1.641	0.604	0.712	0.831	0.75	0.773	0.762	0.828	0.616	2.5319	0.00162	0.97247	0.764425	2.46224	0.00176284													IPR015943;	WD40/YVTN repeat-like-containing domain;	cytosol
T5AAQ9	MD-2-related lipid-recognition OS=Ophiocordyceps sinensis (strain Co18 / CGMCC 3.14243) OX=911162 GN=OCS_05458 PE=4 SV=1	up	2.331	1.558	2.091	1.413	0.58	0.743	0.616	0.996	0.766	0.69	0.549	0.747	2.51889	0.0032935	1.0665	0.681571	2.68641	0.00199056	GO:0051234;GO:0006869;GO:0006810;GO:0044765;GO:0008150;GO:1902578;GO:0071702;GO:0033036;GO:0010876;GO:0051179;GO:0044699;	establishment of localization;lipid transport;transport;single-organism transport;biological_process;single-organism localization;organic substance transport;macromolecule localization;lipid localization;localization;single-organism process;	3;5;4;4;1;3;5;3;4;2;2;										IPR033917;IPR003172;IPR014756;	ML domain, phosphatidylinositol/phosphatidylglycerol transfer protein;MD-2-related lipid-recognition domain;Immunoglobulin E-set;	extracellular	YDL046w	108	R	[R] General function prediction only;
T5AF75	Regulator of chromosome condensation/beta-lactamase-inhibitor protein II OS=Ophiocordyceps sinensis (strain Co18 / CGMCC 3.14243) OX=911162 GN=OCS_03896 PE=4 SV=1	up	2.381	1.643	2.216	1.389	0.729	0.732	0.598	0.974	0.701	0.78	0.509	0.8	2.51534	0.00349521	1.0871	0.57585	2.73441	0.00252729	GO:0033157;GO:0051169;GO:0008104;GO:0032388;GO:0000086;GO:0051049;GO:0032386;GO:0051168;GO:0007165;GO:0071840;GO:0051716;GO:0045786;GO:0090169;GO:0070727;GO:0070271;GO:0051493;GO:0044093;GO:0048518;GO:0048519;GO:0031291;GO:0007088;GO:0051050;GO:0045184;GO:0010972;GO:0051222;GO:0044700;GO:1901673;GO:0051783;GO:0023052;GO:0070507;GO:0022607;GO:0006611;GO:1903651;GO:0000226;GO:0007067;GO:0051223;GO:…	regulation of intracellular protein transport;nuclear transport;protein localization;positive regulation of intracellular transport;G2/M transition of mitotic cell cycle;regulation of transport;regulation of intracellular transport;nuclear export;signal transduction;cellular component organization or biogenesis;cellular response to stimulus;negative regulation of cell cycle;regulation of spindle …	6;6;4;4;6;4;5;8;4;2;3;4;5;4;4;6;4;2;2;8;6;3;4;7;4;3;6;5;2;5;4;6;5;5;5;5;2;5;7;6;6;3;6;5;2;5;3;5;4;6;4;3;6;6;1;4;4;3;6;5;5;5;2;5;6;7;7;6;6;5;6;5;5;4;5;6;6;5;6;5;4;3;6;7;2;4;6;6;6;7;5;6;6;2;3;6;3;4;6;5;4;3;5;5;5;6;4;4;5;5;6;6;4;4;4;5;4;5;7;5;5;5;7;6;4;3;4;4;4;5;2;3;3;4;4;5;5;4;3;4;3;7;5;5;5;7;3;	GO:0031974;GO:0031981;GO:0000790;GO:0043231;GO:0043232;GO:0043233;GO:0044428;GO:0044424;GO:0044422;GO:0000228;GO:0043229;GO:0043228;GO:0043227;GO:0005856;GO:0044430;GO:0051233;GO:0044427;GO:0044446;GO:0005634;GO:0044454;GO:0032991;GO:0044464;GO:0005623;GO:0005622;GO:0005819;GO:0070013;GO:0043226;GO:0005694;GO:0000785;GO:0015630;GO:0072686;GO:1990023;GO:0005575;	membrane-enclosed lumen;nuclear lumen;nuclear chromatin;intracellular membrane-bounded organelle;intracellular non-membrane-bounded organelle;organelle lumen;nuclear part;intracellular part;organelle part;nuclear chromosome;intracellular organelle;non-membrane-bounded organelle;membrane-bounded organelle;cytoskeleton;cytoskeletal part;spindle midzone;chromosomal part;intracellular organelle part;…	2;5;4;4;4;3;4;3;2;5;3;3;3;5;4;5;4;3;5;5;2;2;2;3;5;4;2;5;3;6;6;6;1;	GO:0098772;GO:0005088;GO:0005085;GO:0005087;GO:0003674;	molecular function regulator;Ras guanyl-nucleotide exchange factor activity;guanyl-nucleotide exchange factor activity;Ran guanyl-nucleotide exchange factor activity;molecular_function;	2;4;3;5;1;	K11493			IPR009091;IPR000408;	Regulator of chromosome condensation 1/beta-lactamase-inhibitor protein II;Regulator of chromosome condensation, RCC1;	nucleus	SPBC557.03c	331	S	[S] Function unknown;
T5A9P8	Glutamine synthetase OS=Ophiocordyceps sinensis (strain Co18 / CGMCC 3.14243) OX=911162 GN=OCS_05748 PE=3 SV=1	up	1.656	1.578	1.847	1.696	0.714	0.711	0.581	0.693	0.917	0.799	0.65	0.674	2.51092	4.15537e-06	0.88783	0.264726	2.22928	3.07534e-05	GO:0044237;GO:0009064;GO:0019752;GO:0006807;GO:0044283;GO:1901576;GO:0044710;GO:0044711;GO:0006520;GO:0006541;GO:0071704;GO:1901605;GO:0044238;GO:0009987;GO:0046394;GO:0009058;GO:0008150;GO:0008152;GO:0009084;GO:0043436;GO:0044763;GO:0008652;GO:0044699;GO:1901564;GO:0006082;GO:1901566;GO:0016053;GO:1901607;GO:0006542;GO:0044249;GO:0044281;	cellular metabolic process;glutamine family amino acid metabolic process;carboxylic acid metabolic process;nitrogen compound metabolic process;small molecule biosynthetic process;organic substance biosynthetic process;single-organism metabolic process;single-organism biosynthetic process;cellular amino acid metabolic process;glutamine metabolic process;organic substance metabolic process;alpha-am…	3;6;6;3;5;4;3;4;4;7;3;5;3;2;6;3;1;2;7;5;3;5;2;4;4;5;5;6;8;4;4;	GO:0005737;GO:0044464;GO:0005623;GO:0005622;GO:0005575;GO:0044424;	cytoplasm;cell part;cell;intracellular;cellular_component;intracellular part;	4;2;2;3;1;3;	GO:0035639;GO:0016211;GO:0016880;GO:0003674;GO:0005488;GO:0000166;GO:1901363;GO:1901265;GO:0001882;GO:0043167;GO:0016879;GO:0001883;GO:0032549;GO:0017076;GO:0005524;GO:0043168;GO:0036094;GO:0003824;GO:0016874;GO:0032555;GO:0030554;GO:0004356;GO:0097159;GO:0097367;GO:0032559;GO:0032550;GO:0032553;	purine ribonucleoside triphosphate binding;ammonia ligase activity;acid-ammonia (or amide) ligase activity;molecular_function;binding;nucleotide binding;heterocyclic compound binding;nucleoside phosphate binding;nucleoside binding;ion binding;ligase activity, forming carbon-nitrogen bonds;purine nucleoside binding;ribonucleoside binding;purine nucleotide binding;ATP binding;anion binding;small mo…	5;6;5;1;2;4;3;4;4;3;4;5;5;5;6;4;3;2;3;5;6;7;3;3;6;6;4;	K01915	map00220;map00250;map00630;map00910;map01100;map01120;map01230;map02020;map04724;map04727;	Arginine biosynthesis;"Alanine, aspartate and glutamate metabolism";Glyoxylate and dicarboxylate metabolism;Nitrogen metabolism;Metabolic pathways;Microbial metabolism in diverse environments;Biosynthesis of amino acids;Two-component system;Glutamatergic synapse;GABAergic synapse;	IPR008147;IPR008146;IPR014746;IPR027302;IPR027303;	Glutamine synthetase, beta-Grasp domain;Glutamine synthetase, catalytic domain;Glutamine synthetase/guanido kinase, catalytic domain;Glutamine synthetase, N-terminal conserved site;Glutamine synthetase, glycine-rich site;	mitochondria	SPAC23H4.06	487	E	[E] Amino acid transport and metabolism;
T5A7R7	Ubiquitin carboxyl-terminal hydrolase OS=Ophiocordyceps sinensis (strain Co18 / CGMCC 3.14243) OX=911162 GN=OCS_02763 PE=3 SV=1	up	2.288	1.736	1.948	1.524	0.708	0.834	0.8	0.675	0.765	0.682	1.032	0.901	2.4846	0.000537034	0.8926	0.329917	2.21775	0.00124701	GO:0071108;GO:0044248;GO:0043632;GO:0044267;GO:1901575;GO:0044265;GO:0044260;GO:0043161;GO:0070647;GO:0070646;GO:0071704;GO:0006508;GO:0016579;GO:0044238;GO:0009987;GO:0019941;GO:0006464;GO:0043412;GO:0036211;GO:0008150;GO:0030163;GO:0008152;GO:0044257;GO:0009056;GO:0009057;GO:0051603;GO:0019538;GO:0010498;GO:0044237;GO:0043170;GO:0006511;	protein K48-linked deubiquitination;cellular catabolic process;modification-dependent macromolecule catabolic process;cellular protein metabolic process;organic substance catabolic process;cellular macromolecule catabolic process;cellular macromolecule metabolic process;proteasome-mediated ubiquitin-dependent protein catabolic process;protein modification by small protein conjugation or removal;p…	8;4;6;5;4;5;4;7;7;6;3;5;7;3;2;7;6;5;5;1;5;2;6;3;5;6;4;6;3;4;8;	GO:0044464;GO:0031974;GO:0043229;GO:0005623;GO:0005622;GO:0043227;GO:0043226;GO:0005634;GO:0005654;GO:0044446;GO:0043231;GO:0043233;GO:0031981;GO:0005575;GO:0070013;GO:0044428;GO:0044424;GO:0044422;	cell part;membrane-enclosed lumen;intracellular organelle;cell;intracellular;membrane-bounded organelle;organelle;nucleus;nucleoplasm;intracellular organelle part;intracellular membrane-bounded organelle;organelle lumen;nuclear lumen;cellular_component;intracellular organelle lumen;nuclear part;intracellular part;organelle part;	2;2;3;2;3;3;2;5;5;3;4;3;5;1;4;4;3;2;	GO:0008270;GO:0043169;GO:0008238;GO:0003674;GO:0019783;GO:0043167;GO:0008234;GO:0070011;GO:0046872;GO:0016787;GO:0101005;GO:0008242;GO:0046914;GO:0003824;GO:0036459;GO:0008233;GO:1990380;GO:0005488;	zinc ion binding;cation binding;exopeptidase activity;molecular_function;ubiquitin-like protein-specific protease activity;ion binding;cysteine-type peptidase activity;peptidase activity, acting on L-amino acid peptides;metal ion binding;hydrolase activity;ubiquitinyl hydrolase activity;omega peptidase activity;transition metal ion binding;catalytic activity;thiol-dependent ubiquitinyl hydrolase …	7;4;6;1;7;3;6;5;5;3;4;7;6;2;5;4;5;2;	K11836			IPR009060;IPR016652;IPR018200;IPR001394;IPR013083;IPR015940;IPR028889;IPR001607;	UBA-like;Ubiquitinyl hydrolase;Ubiquitin specific protease, conserved site;Peptidase C19, ubiquitin carboxyl-terminal hydrolase;Zinc finger, RING/FYVE/PHD-type;Ubiquitin-associated domain;Ubiquitin specific protease domain;Zinc finger, UBP-type;	cytosol	SPBC6B1.06c	547	O	[O] Posttranslational modification, protein turnover, chaperones;
T5AI78	Short-chain dehydrogenase OS=Ophiocordyceps sinensis (strain Co18 / CGMCC 3.14243) OX=911162 GN=OCS_02741 PE=4 SV=1	up	2.661	1.644	2.579	1.22	0.722	0.867	0.613	1.06	0.853	0.852	0.793	1.006	2.48435	0.016452	0.93094	0.591875	2.31279	0.0181102	GO:0030435;GO:0030154;GO:0048468;GO:0019953;GO:0043935;GO:0043934;GO:0044248;GO:0044281;GO:0044282;GO:0044242;GO:0009653;GO:0044699;GO:0022414;GO:0051321;GO:0019752;GO:0048869;GO:0034293;GO:0071704;GO:0007049;GO:1901575;GO:0051704;GO:0016042;GO:0048646;GO:0032502;GO:0044712;GO:0044255;GO:0006629;GO:0032505;GO:0009987;GO:0044710;GO:0032787;GO:0044767;GO:0030437;GO:0008150;GO:0022413;GO:0072329;GO:…	sporulation resulting in formation of a cellular spore;cell differentiation;cell development;sexual reproduction;sexual sporulation resulting in formation of a cellular spore;sporulation;cellular catabolic process;small molecule metabolic process;small molecule catabolic process;cellular lipid catabolic process;anatomical structure morphogenesis;single-organism process;reproductive process;meioti…	4;5;4;3;4;4;4;4;5;5;3;2;2;3;6;4;4;3;4;4;2;5;3;2;4;4;4;3;2;3;7;3;4;1;3;7;5;5;4;2;2;3;3;3;4;3;6;5;3;3;6;4;3;3;	GO:0005782;GO:0044438;GO:0044464;GO:0042579;GO:0043229;GO:0043227;GO:0043226;GO:0005737;GO:0044446;GO:0043233;GO:0005777;GO:0031907;GO:0044439;GO:0031974;GO:0043231;GO:0005623;GO:0005622;GO:0005575;GO:0070013;GO:0044444;GO:0044424;GO:0044422;	peroxisomal matrix;microbody part;cell part;microbody;intracellular organelle;membrane-bounded organelle;organelle;cytoplasm;intracellular organelle part;organelle lumen;peroxisome;microbody lumen;peroxisomal part;membrane-enclosed lumen;intracellular membrane-bounded organelle;cell;intracellular;cellular_component;intracellular organelle lumen;cytoplasmic part;intracellular part;organelle part;	6;4;2;5;3;3;2;4;3;3;6;5;5;2;4;2;3;1;4;4;3;2;	GO:0003674;GO:0016491;GO:0016628;GO:0016627;GO:0003824;GO:0008670;	molecular_function;oxidoreductase activity;oxidoreductase activity, acting on the CH-CH group of donors, NAD or NADP as acceptor;oxidoreductase activity, acting on the CH-CH group of donors;catalytic activity;2,4-dienoyl-CoA reductase (NADPH) activity;	1;3;5;4;2;6;	K13237	map04146;	Peroxisome;	IPR002347;IPR016040;	Short-chain dehydrogenase/reductase SDR;NAD(P)-binding domain;	mitochondria	YNL202w	232	R	[R] General function prediction only;
T5AM46	Uncharacterized protein OS=Ophiocordyceps sinensis (strain Co18 / CGMCC 3.14243) OX=911162 GN=OCS_00648 PE=4 SV=1	up	1.749	1.639	1.886	1.44	0.699	0.685	0.559	0.765	0.772	0.802	0.632	0.686	2.4793	7.00649e-05	0.93638	0.458665	2.32158	8.37919e-05															extracellular
T5AAF2	Pyruvate dehydrogenase kinase OS=Ophiocordyceps sinensis (strain Co18 / CGMCC 3.14243) OX=911162 GN=OCS_05578 PE=4 SV=1	up	1.961	1.669	2.071	1.854	0.812	0.856	0.703	0.709	0.782	0.706	0.555	0.486	2.4529	2.08776e-05	1.21787	0.126932	2.98735	2.59188e-05													IPR009020;IPR010259;	Protease propeptides/proteinase inhibitor I9;Peptidase S8 propeptide/proteinase inhibitor I9;	cytosol
T5AM05	Beta-glucosidase OS=Ophiocordyceps sinensis (strain Co18 / CGMCC 3.14243) OX=911162 GN=OCS_01430 PE=3 SV=1	up	1.793	1.653	1.988	1.83	0.718	0.78	0.748	0.719	1.028	0.956	0.874	0.844	2.4499	4.98455e-06	0.80092	0.00581251	1.96218	3.22995e-05	GO:0030243;GO:0030245;GO:0044248;GO:0009251;GO:0044247;GO:1901575;GO:0044262;GO:0044260;GO:0071704;GO:0006073;GO:0044042;GO:0009987;GO:0044264;GO:0000272;GO:0008150;GO:0051273;GO:0008152;GO:0009056;GO:0009057;GO:0044275;GO:0044238;GO:0005975;GO:0051275;GO:0005976;GO:0016052;GO:0044237;GO:0043170;	cellulose metabolic process;cellulose catabolic process;cellular catabolic process;glucan catabolic process;cellular polysaccharide catabolic process;organic substance catabolic process;cellular carbohydrate metabolic process;cellular macromolecule metabolic process;organic substance metabolic process;cellular glucan metabolic process;glucan metabolic process;cellular process;cellular polysacchar…	8;8;4;7;6;4;4;4;3;6;6;2;5;6;1;7;2;3;5;5;3;4;7;5;5;3;4;	GO:0005575;GO:0005576;	cellular_component;extracellular region;	1;2;	GO:0015926;GO:0016798;GO:0003674;GO:0008422;GO:0003824;GO:0016787;GO:0004553;	glucosidase activity;hydrolase activity, acting on glycosyl bonds;molecular_function;beta-glucosidase activity;catalytic activity;hydrolase activity;hydrolase activity, hydrolyzing O-glycosyl compounds;	6;4;1;7;2;3;5;	K05349	map00460;map00500;map00940;map01100;map01110;	Cyanoamino acid metabolism;Starch and sucrose metabolism;Phenylpropanoid biosynthesis;Metabolic pathways;Biosynthesis of secondary metabolites;	IPR013783;IPR002772;IPR017853;IPR001764;IPR026891;IPR019800;	Immunoglobulin-like fold;Glycoside hydrolase family 3 C-terminal domain;Glycoside hydrolase superfamily;Glycoside hydrolase, family 3, N-terminal;Fibronectin type III-like domain;Glycoside hydrolase, family 3, active site;	extracellular	271967420	269	G	[G] Carbohydrate transport and metabolism;	COG1472	Periplasmic beta-glucosidase and related glycosidases
T5AFD9	Carboxypeptidase OS=Ophiocordyceps sinensis (strain Co18 / CGMCC 3.14243) OX=911162 GN=OCS_00114 PE=3 SV=1	up	2.12	0.988	1.126	1.159	0.414	0.623	0.423	0.744	0.467	0.678	0.586	0.898	2.4469	0.0262713	0.83834	0.415607	2.05135	0.0459699	GO:0043043;GO:0044249;GO:0006807;GO:0044237;GO:0044699;GO:1901576;GO:0044710;GO:0044711;GO:0046938;GO:0071704;GO:1901566;GO:0009987;GO:0019748;GO:0009058;GO:0046937;GO:0008150;GO:0008152;GO:1901564;GO:0043604;GO:0044271;GO:0043603;GO:0034641;GO:0044550;GO:0044763;GO:0006518;	peptide biosynthetic process;cellular biosynthetic process;nitrogen compound metabolic process;cellular metabolic process;single-organism process;organic substance biosynthetic process;single-organism metabolic process;single-organism biosynthetic process;phytochelatin biosynthetic process;organic substance metabolic process;organonitrogen compound biosynthetic process;cellular process;secondary …	6;4;3;3;2;4;3;4;5;3;5;2;4;3;4;1;2;4;6;5;5;4;5;3;5;	GO:0000324;GO:0000323;GO:0000322;GO:0043229;GO:0043227;GO:0043226;GO:0005737;GO:0005773;GO:0043231;GO:0044464;GO:0005623;GO:0005622;GO:0005575;GO:0044444;GO:0044424;	fungal-type vacuole;lytic vacuole;storage vacuole;intracellular organelle;membrane-bounded organelle;organelle;cytoplasm;vacuole;intracellular membrane-bounded organelle;cell part;cell;intracellular;cellular_component;cytoplasmic part;intracellular part;	7;6;6;3;3;2;4;5;4;2;2;3;1;4;3;	GO:0003674;GO:0008233;GO:0008236;GO:0004180;GO:0004185;GO:0070008;GO:0016787;GO:0017171;GO:0003824;GO:0008238;GO:0070011;	molecular_function;peptidase activity;serine-type peptidase activity;carboxypeptidase activity;serine-type carboxypeptidase activity;serine-type exopeptidase activity;hydrolase activity;serine hydrolase activity;catalytic activity;exopeptidase activity;peptidase activity, acting on L-amino acid peptides;	1;4;5;7;7;6;3;4;2;6;5;				IPR033124;IPR001563;IPR018202;IPR029058;	Serine carboxypeptidases, histidine active site;Peptidase S10, serine carboxypeptidase;Serine carboxypeptidase, serine active site;Alpha/Beta hydrolase fold;	extracellular	YMR297w	492	OE	[O] Posttranslational modification, protein turnover, chaperones;[E] Amino acid transport and metabolism;
T5AEV6	Importin subunit alpha OS=Ophiocordyceps sinensis (strain Co18 / CGMCC 3.14243) OX=911162 GN=OCS_03183 PE=3 SV=1	up	2.105	1.969	1.969	1.488	0.75	0.73	0.739	0.862	0.74	0.622	1.017	0.803	2.44433	0.000202165	0.96826	0.784709	2.36675	0.000476552	GO:0034504;GO:0051169;GO:0008104;GO:0072594;GO:0044699;GO:0070727;GO:0006810;GO:0071702;GO:0033036;GO:0017038;GO:1902593;GO:0034613;GO:0006606;GO:0006913;GO:1902582;GO:0006605;GO:0045184;GO:0015031;GO:0044765;GO:0051170;GO:0051649;GO:0044744;GO:0051234;GO:0051179;GO:1902578;GO:0051641;GO:0046907;GO:0033365;GO:0008150;GO:1902580;GO:0006886;	protein localization to nucleus;nuclear transport;protein localization;establishment of protein localization to organelle;single-organism process;cellular macromolecule localization;transport;organic substance transport;macromolecule localization;protein import;single-organism nuclear import;cellular protein localization;protein import into nucleus;nucleocytoplasmic transport;single-organism intr…	7;6;4;5;2;4;4;5;3;5;6;5;5;7;5;6;4;5;4;8;4;5;3;2;3;3;5;6;1;4;6;	GO:0043229;GO:0043227;GO:0043226;GO:0005737;GO:0005634;GO:0043231;GO:0044464;GO:0005623;GO:0005622;GO:0005575;GO:0044424;	intracellular organelle;membrane-bounded organelle;organelle;cytoplasm;nucleus;intracellular membrane-bounded organelle;cell part;cell;intracellular;cellular_component;intracellular part;	3;3;2;4;5;4;2;2;3;1;3;	GO:0003674;GO:0008565;GO:0005215;GO:0022892;	molecular_function;protein transporter activity;transporter activity;substrate-specific transporter activity;	1;4;2;3;	K15042	map05164;	Influenza A;	IPR016024;IPR000225;IPR002652;IPR024931;IPR032413;IPR011989;	Armadillo-type fold;Armadillo;Importin-alpha, importin-beta-binding domain;Importin subunit alpha;Atypical Arm repeat;Armadillo-like helical;	plasma membrane	SPCC962.03c	701	U	[U] Intracellular trafficking, secretion, and vesicular transport;
T5AIS0	Uncharacterized protein OS=Ophiocordyceps sinensis (strain Co18 / CGMCC 3.14243) OX=911162 GN=OCS_02571 PE=4 SV=1	up	1.866	1.515	1.633	1.215	0.598	0.691	0.594	0.667	1.079	0.989	0.761	1.232	2.44272	0.000543166	0.62792	0.00982148	1.53386	0.0177463															cytosol, nucleus
T5A9A5	Trm112p-like protein OS=Ophiocordyceps sinensis (strain Co18 / CGMCC 3.14243) OX=911162 GN=OCS_05896 PE=4 SV=1	up	2.423	1.677	1.777	1.501	0.716	0.771	0.788	0.748	0.852	0.77	0.778	0.897	2.44063	0.00166711	0.91689	0.0922512	2.23779	0.00241311	GO:0006479;GO:0036265;GO:0031167;GO:0036260;GO:0009452;GO:0009451;GO:0090304;GO:0034641;GO:0006807;GO:0008033;GO:0034660;GO:1901360;GO:0019538;GO:0030488;GO:0044260;GO:0042254;GO:0071704;GO:0010467;GO:0071840;GO:0006400;GO:0070475;GO:0070476;GO:0032259;GO:0006364;GO:0034470;GO:0006139;GO:0008213;GO:0009987;GO:0006725;GO:0006464;GO:0022613;GO:0043412;GO:0036211;GO:0008150;GO:0008152;GO:0001510;GO:…	protein methylation;RNA (guanine-N7)-methylation;rRNA methylation;RNA capping;7-methylguanosine RNA capping;RNA modification;nucleic acid metabolic process;cellular nitrogen compound metabolic process;nitrogen compound metabolic process;tRNA processing;ncRNA metabolic process;organic cyclic compound metabolic process;protein metabolic process;tRNA methylation;cellular macromolecule metabolic proc…	5;6;6;7;8;6;5;4;3;8;6;4;4;6;4;5;3;5;2;7;7;7;3;6;7;4;7;2;4;6;4;5;5;1;2;5;5;4;5;3;7;7;3;4;7;3;4;6;6;	GO:0005623;GO:0005622;GO:0043227;GO:0043226;GO:0005737;GO:0005634;GO:0043231;GO:0005829;GO:0044464;GO:0043229;GO:0005575;GO:0044444;GO:0044424;	cell;intracellular;membrane-bounded organelle;organelle;cytoplasm;nucleus;intracellular membrane-bounded organelle;cytosol;cell part;intracellular organelle;cellular_component;cytoplasmic part;intracellular part;	2;3;3;2;4;5;4;5;2;3;1;4;3;				K15448			IPR005651;	Uncharacterised protein family UPF0434/Trm112;	cytosol	SPAC31A2.02	122	S	[S] Function unknown;
T5AAJ8	Glycosyltransferase family 39 OS=Ophiocordyceps sinensis (strain Co18 / CGMCC 3.14243) OX=911162 GN=OCS_05524 PE=4 SV=1	up	1.883	1.502	2.53	1.739	0.976	0.826	0.625	0.72	0.886	0.802	0.524	0.607	2.43214	0.0028635	1.11635	0.49439	2.71515	0.00214968	GO:0019222;GO:0035268;GO:0035269;GO:0044011;GO:0044010;GO:0071840;GO:0080090;GO:0051716;GO:0010605;GO:0071704;GO:0044419;GO:0036170;GO:0048519;GO:0071852;GO:0031589;GO:0060255;GO:0030162;GO:0051703;GO:0051704;GO:0031668;GO:0031669;GO:0031505;GO:0019538;GO:0031667;GO:0007154;GO:0009892;GO:0034645;GO:0030447;GO:0043170;GO:0044267;GO:0044260;GO:0016043;GO:0070887;GO:0065007;GO:0044699;GO:0090609;GO:…	regulation of metabolic process;protein mannosylation;protein O-linked mannosylation;single-species biofilm formation on inanimate substrate;single-species biofilm formation;cellular component organization or biogenesis;regulation of primary metabolic process;cellular response to stimulus;negative regulation of macromolecule metabolic process;organic substance metabolic process;interspecies inter…	3;5;6;4;5;2;4;3;4;3;3;5;2;4;4;4;6;3;2;4;5;5;4;5;4;3;5;3;4;5;4;3;4;2;2;6;4;5;3;3;5;5;1;2;4;2;3;6;5;5;3;4;4;4;5;5;5;5;2;4;2;3;3;5;5;5;4;5;4;4;4;6;4;4;4;5;4;5;6;2;4;2;3;4;3;4;6;3;5;3;3;3;3;4;6;3;4;3;	GO:0005783;GO:0005789;GO:0016021;GO:0016020;GO:0098588;GO:0043231;GO:0042175;GO:0044424;GO:0044425;GO:0044422;GO:0044464;GO:0043229;GO:0043227;GO:0043226;GO:0044432;GO:0012505;GO:0044446;GO:0044444;GO:0031224;GO:0005737;GO:0031090;GO:0005623;GO:0005622;GO:0071944;GO:0005886;GO:0005575;	endoplasmic reticulum;endoplasmic reticulum membrane;integral component of membrane;membrane;bounding membrane of organelle;intracellular membrane-bounded organelle;nuclear outer membrane-endoplasmic reticulum membrane network;intracellular part;membrane part;organelle part;cell part;intracellular organelle;membrane-bounded organelle;organelle;endoplasmic reticulum part;endomembrane system;intrac…	4;3;4;2;4;4;3;3;2;2;2;3;3;2;4;3;3;4;3;4;3;2;3;3;3;1;	GO:0016740;GO:0016757;GO:0003674;GO:0003824;GO:0016758;GO:0000030;GO:0004169;	transferase activity;transferase activity, transferring glycosyl groups;molecular_function;catalytic activity;transferase activity, transferring hexosyl groups;mannosyltransferase activity;dolichyl-phosphate-mannose-protein mannosyltransferase activity;	3;4;1;2;5;6;7;	K00728	map00514;	Other types of O-glycan biosynthesis;	IPR027005;IPR016093;IPR003342;IPR032421;	Glycosyltransferase 39-like;MIR motif;Glycosyl transferase family 39/83;Protein O-mannosyl-transferase, C-terminal four TM domain;	plasma membrane	YDL095w	547	O	[O] Posttranslational modification, protein turnover, chaperones;
T5AHD5	Eukaryotic translation initiation factor 3 subunit K OS=Ophiocordyceps sinensis (strain Co18 / CGMCC 3.14243) OX=911162 GN=OCS_03042 PE=3 SV=1	up	1.794	1.829	2.043	1.38	0.74	0.65	0.679	0.833	0.993	0.658	0.657	0.731	2.42801	0.000369639	0.95492	0.714652	2.31853	0.000766185	GO:0022607;GO:0080090;GO:0019222;GO:0051246;GO:0043933;GO:0034622;GO:0031323;GO:1901564;GO:0044249;GO:0034641;GO:0006807;GO:0044237;GO:0034645;GO:0043170;GO:0050789;GO:0071840;GO:0043043;GO:0044267;GO:0071826;GO:0044260;GO:0016043;GO:0065003;GO:0071704;GO:0010467;GO:0022618;GO:0065007;GO:0031326;GO:0022613;GO:2000112;GO:0010468;GO:1901576;GO:0060255;GO:0006446;GO:0009987;GO:0009889;GO:0050794;GO:…	cellular component assembly;regulation of primary metabolic process;regulation of metabolic process;regulation of protein metabolic process;macromolecular complex subunit organization;cellular macromolecular complex assembly;regulation of cellular metabolic process;organonitrogen compound metabolic process;cellular biosynthetic process;cellular nitrogen compound metabolic process;nitrogen compoun…	4;4;3;5;4;6;4;4;4;4;3;3;5;4;2;2;6;5;5;4;3;5;3;5;5;2;5;4;6;5;4;4;5;2;4;3;6;3;5;1;4;2;5;5;5;6;3;5;5;5;4;5;6;5;4;6;3;	GO:1990904;GO:0033290;GO:0005737;GO:0005852;GO:0016282;GO:0070993;GO:0030529;GO:0043234;GO:0032991;GO:0044464;GO:0005623;GO:0005622;GO:0005575;GO:0044444;GO:0044424;	ribonucleoprotein complex;eukaryotic 48S preinitiation complex;cytoplasm;eukaryotic translation initiation factor 3 complex;eukaryotic 43S preinitiation complex;translation preinitiation complex;intracellular ribonucleoprotein complex;protein complex;macromolecular complex;cell part;cell;intracellular;cellular_component;cytoplasmic part;intracellular part;	3;6;4;4;6;5;4;3;2;2;2;3;1;4;3;	GO:0005488;GO:0003674;GO:0043021;GO:0003676;GO:0003723;GO:0008135;GO:0097159;GO:0043022;GO:0044877;GO:0003743;GO:1901363;	binding;molecular_function;ribonucleoprotein complex binding;nucleic acid binding;RNA binding;translation factor activity, RNA binding;organic cyclic compound binding;ribosome binding;macromolecular complex binding;translation initiation factor activity;heterocyclic compound binding;	2;1;4;4;5;6;3;5;3;7;3;	K15028			IPR016024;IPR011991;IPR009374;IPR033464;IPR016020;	Armadillo-type fold;Winged helix-turn-helix DNA-binding domain;Eukaryotic translation initiation factor 3 subunit K;CSN8/PSMD8/EIF3K;Translation initiation factor 3, subunit 12, N-terminal, eukaryotic;	nucleus	Hs10801345	102	S	[S] Function unknown;
T5ALD9	Glucosidase II alpha subunit OS=Ophiocordyceps sinensis (strain Co18 / CGMCC 3.14243) OX=911162 GN=OCS_01660 PE=3 SV=1	up	2.62	1.922	1.572	1.421	0.634	0.77	0.735	0.965	0.726	0.729	0.804	0.876	2.42754	0.00698078	0.99011	0.92401	2.40351	0.0064652	GO:0030582;GO:0030587;GO:0044710;GO:0000003;GO:0048513;GO:0003006;GO:0031669;GO:0031668;GO:0044702;GO:0009605;GO:0044707;GO:0019538;GO:0031667;GO:0033554;GO:0044267;GO:0044260;GO:0051716;GO:0043412;GO:0043413;GO:0008150;GO:0009267;GO:0044723;GO:0050896;GO:0006950;GO:0036211;GO:0008152;GO:0019954;GO:0009311;GO:0044249;GO:0034645;GO:0009653;GO:0044699;GO:0032502;GO:0071496;GO:0048608;GO:0009987;GO:…	fruiting body development;sorocarp development;single-organism metabolic process;reproduction;animal organ development;developmental process involved in reproduction;cellular response to nutrient levels;cellular response to extracellular stimulus;single organism reproductive process;response to external stimulus;single-multicellular organism process;protein metabolic process;response to nutrient …	6;4;3;2;4;3;5;4;3;3;3;4;5;4;5;4;3;5;6;1;5;4;2;3;5;2;3;5;4;5;3;2;2;4;4;2;5;4;4;4;4;5;4;5;2;4;5;6;4;5;4;3;4;5;6;3;2;3;5;3;4;3;4;6;3;3;	GO:0005783;GO:0005794;GO:0043231;GO:0044424;GO:0043229;GO:0005622;GO:0043227;GO:0043226;GO:0012505;GO:0044444;GO:0005737;GO:0044464;GO:0005623;GO:0005575;	endoplasmic reticulum;Golgi apparatus;intracellular membrane-bounded organelle;intracellular part;intracellular organelle;intracellular;membrane-bounded organelle;organelle;endomembrane system;cytoplasmic part;cytoplasm;cell part;cell;cellular_component;	4;4;4;3;3;3;3;2;3;4;4;2;2;1;	GO:0004553;GO:0003674;GO:0005488;GO:0016787;GO:0003824;GO:0016798;GO:0090600;GO:0015926;GO:0030246;GO:0033919;GO:0090599;	hydrolase activity, hydrolyzing O-glycosyl compounds;molecular_function;binding;hydrolase activity;catalytic activity;hydrolase activity, acting on glycosyl bonds;alpha-1,3-glucosidase activity;glucosidase activity;carbohydrate binding;glucan 1,3-alpha-glucosidase activity;alpha-glucosidase activity;	5;1;2;3;2;4;8;6;3;9;7;	K05546	map00510;map01100;map04141;	N-Glycan biosynthesis;Metabolic pathways;Protein processing in endoplasmic reticulum;	IPR030458;IPR011013;IPR000322;IPR017853;IPR025887;IPR033403;	Glycosyl hydrolases family 31, active site;Galactose mutarotase-like domain;Glycoside hydrolase family 31;Glycoside hydrolase superfamily;Glycoside hydrolase family 31, N-terminal domain;Domain of unknown function DUF5110;	extracellular	SPAC1002.03c	696	GMO	[G] Carbohydrate transport and metabolism;[M] Cell wall/membrane/envelope biogenesis;[O] Posttranslational modification, protein turnover, chaperones;
T5A8K2	ECM33-like protein OS=Ophiocordyceps sinensis (strain Co18 / CGMCC 3.14243) OX=911162 GN=OCS_05365 PE=4 SV=1	up	1.737	1.747	1.767	1.792	0.754	0.77	0.822	0.564	0.776	0.774	0.74	0.669	2.42025	1.9481e-06	0.98344	0.849147	2.3802	2.70767e-08													IPR000494;IPR032675;	Receptor L-domain;Leucine-rich repeat domain, L domain-like;	extracellular
T5ACB3	Endonuclease/Exonuclease/phosphatase family protein OS=Ophiocordyceps sinensis (strain Co18 / CGMCC 3.14243) OX=911162 GN=OCS_04816 PE=4 SV=1	up	nan	1.847	1.91	1.747	nan	0.736	0.77	0.769	nan	0.735	0.753	0.675	2.41932	2.49152e-05	1.05178	0.225716	2.54461	3.02992e-05													IPR005135;	Endonuclease/exonuclease/phosphatase;	extracellular	295135375	145	R	[R] General function prediction only;	COG3568	Metal-dependent hydrolase, endonuclease/exonuclease/phosphatase family
T5AJU2	Carboxypeptidase OS=Ophiocordyceps sinensis (strain Co18 / CGMCC 3.14243) OX=911162 GN=OCS_02187 PE=3 SV=1	up	2.143	1.966	2.662	1.346	0.785	0.912	0.586	1.091	0.799	0.802	0.851	0.822	2.40575	0.00659479	1.03054	0.823035	2.47923	0.00430062										K13289	map04142;map04614;	Lysosome;Renin-angiotensin system;	IPR008442;IPR001563;IPR018202;IPR029058;	Propeptide, carboxypeptidase Y;Peptidase S10, serine carboxypeptidase;Serine carboxypeptidase, serine active site;Alpha/Beta hydrolase fold;	extracellular	YMR297w	541	OE	[O] Posttranslational modification, protein turnover, chaperones;[E] Amino acid transport and metabolism;
T5A7F5	Uncharacterized protein OS=Ophiocordyceps sinensis (strain Co18 / CGMCC 3.14243) OX=911162 GN=OCS_02866 PE=4 SV=1	up	2.531	1.672	2.568	1.505	0.922	0.919	0.683	0.92	0.78	0.774	0.486	0.846	2.40304	0.00552293	1.19335	0.21145	2.86764	0.00356799															cytosol
T5ACI0	Isoleucyl-tRNA synthetase OS=Ophiocordyceps sinensis (strain Co18 / CGMCC 3.14243) OX=911162 GN=OCS_04740 PE=3 SV=1	up	1.826	1.684	2.304	0.951	0.82	0.779	0.623	0.625	0.847	0.753	0.503	0.795	2.3762	0.0138121	0.9824	0.894273	2.33437	0.0158099	GO:0019752;GO:0090304;GO:0044249;GO:0034641;GO:0006807;GO:0044281;GO:0034645;GO:0034660;GO:0044699;GO:0006139;GO:0044710;GO:0044260;GO:0006520;GO:0043043;GO:0071704;GO:0010467;GO:0043604;GO:1901360;GO:0044267;GO:1901576;GO:0009987;GO:0006725;GO:0006428;GO:0009058;GO:0009059;GO:0008150;GO:0008152;GO:0043436;GO:0044271;GO:0046483;GO:0016070;GO:0044238;GO:1901564;GO:1901566;GO:0006082;GO:0019538;GO:…	carboxylic acid metabolic process;nucleic acid metabolic process;cellular biosynthetic process;cellular nitrogen compound metabolic process;nitrogen compound metabolic process;small molecule metabolic process;cellular macromolecule biosynthetic process;ncRNA metabolic process;single-organism process;nucleobase-containing compound metabolic process;single-organism metabolic process;cellular macrom…	6;5;4;4;3;4;5;6;2;4;3;4;4;6;3;5;6;4;5;4;2;4;8;3;5;1;2;5;5;4;5;3;4;5;4;4;3;4;7;5;6;5;7;3;5;6;	GO:0005622;GO:0005737;GO:0005623;GO:0044444;GO:0005829;GO:0044464;GO:0005575;GO:0044424;	intracellular;cytoplasm;cell;cytoplasmic part;cytosol;cell part;cellular_component;intracellular part;	3;4;2;4;5;2;1;3;	GO:0005488;GO:0002161;GO:0032550;GO:0016787;GO:0035639;GO:0003674;GO:1901363;GO:0001882;GO:0004812;GO:0052689;GO:0097367;GO:0016875;GO:0032555;GO:0032549;GO:0005524;GO:0043168;GO:0000166;GO:0001883;GO:0036094;GO:0003824;GO:0016788;GO:0017076;GO:0016874;GO:0004822;GO:0016876;GO:0043167;GO:0030554;GO:0097159;GO:0032559;GO:0032553;GO:1901265;	binding;aminoacyl-tRNA editing activity;purine ribonucleoside binding;hydrolase activity;purine ribonucleoside triphosphate binding;molecular_function;heterocyclic compound binding;nucleoside binding;aminoacyl-tRNA ligase activity;carboxylic ester hydrolase activity;carbohydrate derivative binding;ligase activity, forming carbon-oxygen bonds;purine ribonucleotide binding;ribonucleoside binding;AT…	2;6;6;3;5;1;3;4;6;5;3;4;5;5;6;4;4;5;3;2;4;5;3;7;5;3;6;3;6;4;4;	K01870	map00970;	Aminoacyl-tRNA biosynthesis;	IPR023586;IPR033709;IPR009080;IPR014729;IPR001412;IPR002301;IPR002300;IPR009008;IPR013155;	Isoleucine-tRNA ligase, type 2;Isoleucyl tRNA synthetase type 2, anticodon-binding domain;Aminoacyl-tRNA synthetase, class Ia, anticodon-binding;Rossmann-like alpha/beta/alpha sandwich fold;Aminoacyl-tRNA synthetase, class I, conserved site;Isoleucine-tRNA ligase;Aminoacyl-tRNA synthetase, class Ia;Valyl/Leucyl/Isoleucyl-tRNA synthetase, editing domain;Methionyl/Valyl/Leucyl/Isoleucyl-tRNA synthe…	nucleus	SPBPI058	1380	J	[J] Translation, ribosomal structure and biogenesis;
T4ZWD4	Pyruvate dehydrogenase E1 component subunit alpha OS=Ophiocordyceps sinensis (strain Co18 / CGMCC 3.14243) OX=911162 GN=OCS_06878 PE=4 SV=1	up	1.77	1.741	2.068	1.623	0.744	0.763	0.681	0.844	0.83	0.709	0.593	0.602	2.37535	4.68457e-05	1.109	0.294471	2.63424	5.23161e-05	GO:0009167;GO:0044281;GO:0009161;GO:1901360;GO:0044712;GO:0044710;GO:0044711;GO:0009199;GO:0006733;GO:0009205;GO:0046034;GO:0046031;GO:0032787;GO:0043436;GO:0046128;GO:0009179;GO:0046483;GO:1901564;GO:0016052;GO:0006163;GO:0006165;GO:0009141;GO:0030447;GO:0009144;GO:0046496;GO:1901575;GO:0051186;GO:0016049;GO:0051188;GO:0019637;GO:0071616;GO:0035383;GO:0035384;GO:0009150;GO:0008150;GO:0008152;GO:…	purine ribonucleoside monophosphate metabolic process;small molecule metabolic process;ribonucleoside monophosphate metabolic process;organic cyclic compound metabolic process;single-organism catabolic process;single-organism metabolic process;single-organism biosynthetic process;ribonucleoside triphosphate metabolic process;oxidoreduction coenzyme metabolic process;purine ribonucleoside triphosp…	8;4;7;4;4;3;4;7;6;8;8;8;7;5;7;8;4;4;5;6;7;6;3;7;7;4;4;3;5;4;6;4;5;7;1;2;4;5;5;6;5;5;5;5;6;4;4;6;7;6;2;4;4;6;7;5;2;4;4;6;7;4;6;7;5;4;4;4;3;7;6;6;5;5;4;8;5;6;2;4;3;4;3;3;5;6;3;3;3;5;4;4;6;	GO:0031974;GO:0009295;GO:0043234;GO:1902494;GO:0045254;GO:0043231;GO:0043232;GO:0043233;GO:0044429;GO:0044424;GO:0044422;GO:0043229;GO:0043228;GO:0043227;GO:0043226;GO:0005737;GO:0044446;GO:0044444;GO:1990204;GO:0042645;GO:0005739;GO:0044464;GO:0005623;GO:0005622;GO:0005759;GO:0005967;GO:0032991;GO:0005575;GO:0070013;GO:0098798;	membrane-enclosed lumen;nucleoid;protein complex;catalytic complex;pyruvate dehydrogenase complex;intracellular membrane-bounded organelle;intracellular non-membrane-bounded organelle;organelle lumen;mitochondrial part;intracellular part;organelle part;intracellular organelle;non-membrane-bounded organelle;membrane-bounded organelle;organelle;cytoplasm;intracellular organelle part;cytoplasmic par…	2;2;3;4;4;4;4;3;4;3;2;3;3;3;2;4;3;4;3;3;5;2;2;3;5;5;2;1;4;4;	GO:0016624;GO:0003674;GO:0004738;GO:0004739;GO:0003824;GO:0016491;GO:0016903;	oxidoreductase activity, acting on the aldehyde or oxo group of donors, disulfide as acceptor;molecular_function;pyruvate dehydrogenase activity;pyruvate dehydrogenase (acetyl-transferring) activity;catalytic activity;oxidoreductase activity;oxidoreductase activity, acting on the aldehyde or oxo group of donors;	5;1;5;6;2;3;4;	K00161	map00010;map00020;map00620;map01100;map01110;map01120;map01130;map01200;map04066;map04922;map05230;	Glycolysis / Gluconeogenesis;Citrate cycle (TCA cycle);Pyruvate metabolism;Metabolic pathways;Biosynthesis of secondary metabolites;Microbial metabolism in diverse environments;Biosynthesis of antibiotics;Carbon metabolism;HIF-1 signaling pathway;Glucagon signaling pathway;Central carbon metabolism in cancer;	IPR029061;IPR001017;IPR017597;	Thiamin diphosphate-binding fold;Dehydrogenase, E1 component;Pyruvate dehydrogenase (acetyl-transferring) E1 component, alpha subunit, subgroup y;	mitochondria	YER178w	528	C	[C] Energy production and conversion;
T5APW7	Acyl-CoA dehydrogenase OS=Ophiocordyceps sinensis (strain Co18 / CGMCC 3.14243) OX=911162 GN=OCS_00505 PE=3 SV=1	up	2.247	1.627	1.995	1.381	0.646	0.847	0.707	0.856	0.724	0.738	0.572	0.964	2.37237	0.00188544	1.01935	0.885013	2.41828	0.00221793	GO:0044710;GO:0055114;GO:0008152;GO:0008150;GO:0044699;	single-organism metabolic process;oxidation-reduction process;metabolic process;biological_process;single-organism process;	3;4;2;1;2;				GO:0043169;GO:0020037;GO:0046906;GO:0097159;GO:0043167;GO:0003674;GO:0005488;GO:0046872;GO:1901363;	cation binding;heme binding;tetrapyrrole binding;organic cyclic compound binding;ion binding;molecular_function;binding;metal ion binding;heterocyclic compound binding;	4;5;4;3;3;1;2;5;3;	K23490			IPR009100;IPR001199;IPR013786;	Acyl-CoA dehydrogenase/oxidase, N-terminal and middle domain;Cytochrome b5-like heme/steroid binding domain;Acyl-CoA dehydrogenase/oxidase, N-terminal;	cytosol	At5g48810	70.1	C	[C] Energy production and conversion;
T5ADW2	Eukaryotic translation initiation factor 2c OS=Ophiocordyceps sinensis (strain Co18 / CGMCC 3.14243) OX=911162 GN=OCS_00670 PE=3 SV=1	up	2.333	1.394	1.997	1.521	0.706	0.896	0.729	0.737	0.861	1.019	0.907	0.937	2.3615	0.00326359	0.82385	0.0241388	1.94549	0.00704088	GO:0006479;GO:0036404;GO:0080090;GO:0019222;GO:0030422;GO:0031050;GO:0031056;GO:0051567;GO:1901362;GO:1901360;GO:0044710;GO:0010605;GO:0010608;GO:0040029;GO:0018193;GO:0016458;GO:0048519;GO:0016570;GO:0016571;GO:0060255;GO:0032268;GO:0031060;GO:2001141;GO:0010033;GO:0046483;GO:0031507;GO:0019538;GO:0018205;GO:0043331;GO:0019438;GO:0016569;GO:0071103;GO:0098813;GO:0009892;GO:0070887;GO:0009890;GO:…	protein methylation;conversion of ds siRNA to ss siRNA;regulation of primary metabolic process;regulation of metabolic process;production of siRNA involved in RNA interference;dsRNA fragmentation;regulation of histone modification;histone H3-K9 methylation;organic cyclic compound biosynthetic process;organic cyclic compound metabolic process;single-organism metabolic process;negative regulation o…	5;5;4;3;6;4;5;6;5;4;3;4;6;6;7;4;2;4;5;4;5;6;6;4;4;7;4;8;5;5;7;6;5;3;4;4;6;6;3;6;5;4;2;7;5;4;6;4;6;3;3;5;2;2;7;7;3;5;4;3;3;5;5;5;1;2;5;4;5;5;4;5;6;5;6;6;4;7;5;5;6;6;5;5;5;4;4;4;4;5;5;7;4;4;5;7;6;5;6;4;6;6;2;4;7;7;6;7;7;2;6;5;7;6;5;5;5;6;2;6;6;5;5;4;4;5;5;6;4;6;5;6;6;6;6;7;3;5;7;6;7;6;5;5;5;5;5;6;6;3;5;3;4;4;7;3;6;6;4;3;6;5;6;3;4;5;3;	GO:0031974;GO:0000775;GO:0030529;GO:0031981;GO:1990421;GO:0000792;GO:0000790;GO:0043231;GO:0043232;GO:0043233;GO:0005829;GO:0044424;GO:0044427;GO:0044422;GO:1990904;GO:0031618;GO:0000781;GO:0043229;GO:0000785;GO:0043227;GO:0044428;GO:0098687;GO:0005721;GO:0044446;GO:0044444;GO:0031934;GO:0005737;GO:0005634;GO:0030958;GO:0033167;GO:0005720;GO:0031332;GO:1990707;GO:0044464;GO:0005623;GO:0005622;GO:…	membrane-enclosed lumen;chromosome, centromeric region;intracellular ribonucleoprotein complex;nuclear lumen;subtelomeric heterochromatin;heterochromatin;nuclear chromatin;intracellular membrane-bounded organelle;intracellular non-membrane-bounded organelle;organelle lumen;cytosol;intracellular part;chromosomal part;organelle part;ribonucleoprotein complex;nuclear pericentric heterochromatin;chro…	2;6;4;5;5;4;4;4;4;3;5;3;4;2;3;6;6;3;3;3;4;5;5;3;4;5;4;5;6;5;5;5;6;2;2;3;3;5;2;5;2;1;4;5;	GO:1901363;GO:0004521;GO:0016893;GO:0004519;GO:0005488;GO:0003676;GO:0004540;GO:0016787;GO:0016788;GO:0003824;GO:0097159;GO:0004518;GO:0003727;GO:0003723;GO:0003674;GO:0016891;	heterocyclic compound binding;endoribonuclease activity;endonuclease activity, active with either ribo- or deoxyribonucleic acids and producing 5'-phosphomonoesters;endonuclease activity;binding;nucleic acid binding;ribonuclease activity;hydrolase activity;hydrolase activity, acting on ester bonds;catalytic activity;organic cyclic compound binding;nuclease activity;single-stranded RNA binding;RNA…	3;7;7;6;2;4;6;3;4;2;3;5;6;5;1;8;	K11593			IPR032472;IPR032474;IPR014811;IPR003165;IPR003100;IPR012337;	Argonaute linker 2 domain;Protein argonaute, N-terminal;Argonaute, linker 1 domain;Piwi domain;PAZ domain;Ribonuclease H-like domain;	nucleus	SPCC736.11	377	J	[J] Translation, ribosomal structure and biogenesis;
T5AAZ9	PAN domain containing protein OS=Ophiocordyceps sinensis (strain Co18 / CGMCC 3.14243) OX=911162 GN=OCS_05286 PE=4 SV=1	up	1.511	1.94	2.77	1.664	0.85	0.829	0.655	1.007	0.831	0.644	0.421	0.675	2.36005	0.00779633	1.29949	0.13362	3.0669	0.00396403													IPR003609;	PAN/Apple domain;	nucleus
T5A6L3	MYB DNA-binding domain protein OS=Ophiocordyceps sinensis (strain Co18 / CGMCC 3.14243) OX=911162 GN=OCS_06066 PE=4 SV=1	up	1.893	1.725	nan	nan	0.788	0.751	nan	nan	0.87	0.886	nan	nan	2.35089	0.00677716	0.87642	0.0328197	2.06036	0.00811464													IPR009057;IPR001005;IPR017930;	Homeobox domain-like;SANT/Myb domain;Myb domain;	mitochondria
T5AIJ9	p-hydroxylaminobenzoate lyase OS=Ophiocordyceps sinensis (strain Co18 / CGMCC 3.14243) OX=911162 GN=OCS_02654 PE=4 SV=1	up	nan	nan	1.939	1.712	nan	nan	0.783	0.771	nan	nan	0.612	0.632	2.3494	0.0115476	1.2492	0.00561315	2.93489	0.00884436													IPR029058;IPR032345;	Alpha/Beta hydrolase fold;Protein of unknown function DUF4863;	plasma membrane
T4ZXD0	26S proteasome complex ubiquitin receptor, subunit Rpn13 OS=Ophiocordyceps sinensis (strain Co18 / CGMCC 3.14243) OX=911162 GN=OCS_06499 PE=4 SV=1	up	2.891	1.651	1.828	1.291	0.655	0.847	0.764	1.023	0.708	0.724	0.717	0.89	2.32926	0.0211091	1.08226	0.508785	2.5209	0.0157408										K06691	map03050;map05169;	Proteasome;Epstein-Barr virus infection;	IPR006773;IPR032368;	26S proteasome complex ubiquitin receptor, subunit Rpn13;UCH-binding domain;	cytosol	SPBC342.04	74.3	R	[R] General function prediction only;
T5A7Z4	UBA/TS-N domain-containing protein OS=Ophiocordyceps sinensis (strain Co18 / CGMCC 3.14243) OX=911162 GN=OCS_06355 PE=4 SV=1	up	2.243	nan	1.651	1.484	0.699	nan	0.864	0.746	0.855	nan	0.815	0.833	2.32916	0.0122047	0.92249	0.268956	2.14862	0.0141848	GO:0008104;GO:0030036;GO:0030865;GO:0044699;GO:0000147;GO:0070727;GO:0006886;GO:1902589;GO:0016043;GO:0071840;GO:0071702;GO:0033036;GO:0034613;GO:0006810;GO:0022607;GO:0030029;GO:0044396;GO:0045184;GO:0015031;GO:0008150;GO:0051649;GO:0007010;GO:0051234;GO:0051179;GO:0051641;GO:0006996;GO:0046907;GO:0006897;GO:0016192;GO:0006898;GO:0030866;GO:0044763;GO:0009987;GO:0044085;	protein localization;actin cytoskeleton organization;cortical cytoskeleton organization;single-organism process;actin cortical patch assembly;cellular macromolecule localization;intracellular protein transport;single-organism organelle organization;cellular component organization;cellular component organization or biogenesis;organic substance transport;macromolecule localization;cellular protein …	4;5;6;2;5;4;6;4;3;2;5;3;5;4;4;4;4;4;5;1;4;5;3;2;3;4;5;6;5;7;6;3;2;3;	GO:0015629;GO:0061645;GO:0043229;GO:0043228;GO:0005622;GO:0043226;GO:0005856;GO:0005575;GO:0044430;GO:0005737;GO:0030479;GO:0099568;GO:0005938;GO:0043232;GO:0030863;GO:0044464;GO:0005623;GO:0030864;GO:0044446;GO:0044444;GO:0071944;GO:0044448;GO:0044424;GO:0044422;	actin cytoskeleton;endocytic patch;intracellular organelle;non-membrane-bounded organelle;intracellular;organelle;cytoskeleton;cellular_component;cytoskeletal part;cytoplasm;actin cortical patch;cytoplasmic region;cell cortex;intracellular non-membrane-bounded organelle;cortical cytoskeleton;cell part;cell;cortical actin cytoskeleton;intracellular organelle part;cytoplasmic part;cell periphery;ce…	6;6;3;3;3;2;5;1;4;4;5;5;4;4;6;2;2;5;3;4;3;5;3;2;	GO:0005488;GO:0003674;GO:0043167;GO:0005509;GO:0043169;GO:0046872;	binding;molecular_function;ion binding;calcium ion binding;cation binding;metal ion binding;	2;1;3;6;4;5;	K12472	map04144;	Endocytosis;	IPR011992;IPR000261;	EF-hand domain pair;EH domain;	mitochondria	SPBC800.10c	137	TU	[T] Signal transduction mechanisms;[U] Intracellular trafficking, secretion, and vesicular transport;
T5AGD8	Glutaminyl-tRNA synthetase OS=Ophiocordyceps sinensis (strain Co18 / CGMCC 3.14243) OX=911162 GN=OCS_02664 PE=3 SV=1	up	nan	2.002	nan	1.638	nan	0.758	nan	0.805	nan	0.589	nan	0.728	2.32883	0.0298352	1.18679	0.235627	2.76386	0.0269992										K01886	map00970;map01100;	Aminoacyl-tRNA biosynthesis;Metabolic pathways;	IPR004514;IPR020059;IPR020058;IPR014729;IPR001412;IPR020056;IPR011035;IPR020061;IPR000924;	Glutamine-tRNA synthetase;Glutamyl/glutaminyl-tRNA synthetase, class Ib, anti-codon binding domain;Glutamyl/glutaminyl-tRNA synthetase, class Ib, catalytic domain;Rossmann-like alpha/beta/alpha sandwich fold;Aminoacyl-tRNA synthetase, class I, conserved site;Ribosomal protein L25/Gln-tRNA synthetase, beta-barrel domain;Ribosomal protein L25/Gln-tRNA synthetase, anti-codon-binding domain;Glutamyl/…	cytosol	SPBC342.02	639	J	[J] Translation, ribosomal structure and biogenesis;
T5A9J1	High mobility group protein OS=Ophiocordyceps sinensis (strain Co18 / CGMCC 3.14243) OX=911162 GN=OCS_05805 PE=4 SV=1	up	2.524	1.751	1.906	1.311	0.816	0.803	0.742	0.876	0.696	0.873	0.897	0.754	2.31449	0.00559857	1.00528	0.941187	2.32671	0.00581022													IPR009071;	High mobility group box domain;	mitochondria	YDR174w	52	R	[R] General function prediction only;
T5A1Y7	Serine/threonine-protein phosphatase OS=Ophiocordyceps sinensis (strain Co18 / CGMCC 3.14243) OX=911162 GN=OCS_04846 PE=3 SV=1	up	1.463	1.901	2.624	1.769	0.957	0.782	0.736	0.89	1.106	0.709	0.521	0.926	2.30521	0.00470337	1.03158	0.857046	2.37799	0.00667531	GO:0044257;GO:0051716;GO:0000003;GO:0016458;GO:0007088;GO:0008360;GO:0046483;GO:0019538;GO:0010639;GO:0051783;GO:0051782;GO:0051784;GO:0009894;GO:0009895;GO:0009892;GO:0009893;GO:0009890;GO:1902679;GO:0050789;GO:0000903;GO:0000902;GO:0042254;GO:0006112;GO:1901360;GO:0018130;GO:0007051;GO:0043412;GO:0009266;GO:0044723;GO:0007059;GO:0032434;GO:0035304;GO:0035307;GO:0035306;GO:0044042;GO:0016072;GO:…	cellular protein catabolic process;cellular response to stimulus;reproduction;gene silencing;regulation of mitotic nuclear division;regulation of cell shape;heterocycle metabolic process;protein metabolic process;negative regulation of organelle organization;regulation of nuclear division;negative regulation of cell division;negative regulation of nuclear division;regulation of catabolic process;…	6;3;2;4;6;4;4;4;5;5;4;5;4;4;3;3;4;6;2;4;5;5;5;4;5;5;5;4;4;4;8;7;7;7;6;7;5;5;6;4;4;5;5;6;6;4;7;6;6;5;4;4;2;8;4;4;6;4;5;6;4;6;6;4;6;5;5;6;3;3;5;3;5;4;3;3;4;4;3;4;7;3;4;6;2;9;9;6;6;7;7;5;3;6;5;5;5;4;4;6;7;8;3;4;3;5;5;4;2;6;3;8;5;6;5;5;6;5;5;3;6;3;4;5;5;5;5;2;6;3;4;3;6;4;4;4;6;5;5;5;6;6;7;7;4;4;3;4;3;4;5;5;3;5;6;6;3;8;7;4;7;5;2;4;6;6;2;2;7;3;6;4;3;3;4;5;4;7;6;4;7;6;6;5;4;3;3;6;5;6;6;6;7;6;7;7;6;5;5;5…	GO:0000164;GO:0044428;GO:0044424;GO:0044427;GO:0044422;GO:0005654;GO:0098687;GO:0008287;GO:0044463;GO:0044464;GO:1903293;GO:0070013;GO:1902494;GO:0000793;GO:0000794;GO:0042995;GO:0043234;GO:0043231;GO:0043232;GO:0043233;GO:0044430;GO:0005819;GO:0005816;GO:0005815;GO:0031974;GO:0000922;GO:0000780;GO:0043229;GO:0043228;GO:0043227;GO:0043226;GO:0005856;GO:0005935;GO:0005937;GO:0005933;GO:0044446;GO:…	protein phosphatase type 1 complex;nuclear part;intracellular part;chromosomal part;organelle part;nucleoplasm;chromosomal region;protein serine/threonine phosphatase complex;cell projection part;cell part;phosphatase complex;intracellular organelle lumen;catalytic complex;condensed chromosome;condensed nuclear chromosome;cell projection;protein complex;intracellular membrane-bounded organelle;in…	4;4;3;4;2;5;5;3;3;2;5;4;4;6;6;3;3;4;4;3;4;5;6;5;2;5;6;3;3;3;2;5;4;4;3;3;4;4;5;5;6;7;6;4;5;3;3;5;5;4;4;5;5;2;2;3;5;5;6;1;	GO:0005488;GO:0016787;GO:0016788;GO:0016791;GO:0046872;GO:0003674;GO:0003824;GO:0042578;GO:0043169;GO:0043167;GO:0004722;GO:0004721;	binding;hydrolase activity;hydrolase activity, acting on ester bonds;phosphatase activity;metal ion binding;molecular_function;catalytic activity;phosphoric ester hydrolase activity;cation binding;ion binding;protein serine/threonine phosphatase activity;phosphoprotein phosphatase activity;	2;3;4;6;5;1;2;5;4;3;8;7;	K06269	map03015;map04022;map04024;map04113;map04114;map04261;map04270;map04390;map04510;map04611;map04720;map04728;map04750;map04810;map04910;map04921;map04931;map05031;map05034;map05168;map05205;	mRNA surveillance pathway;cGMP-PKG signaling pathway;cAMP signaling pathway;Meiosis - yeast;Oocyte meiosis;Adrenergic signaling in cardiomyocytes;Vascular smooth muscle contraction;Hippo signaling pathway;Focal adhesion;Platelet activation;Long-term potentiation;Dopaminergic synapse;Inflammatory mediator regulation of TRP channels;Regulation of actin cytoskeleton;Insulin signaling pathway;Oxytoci…	IPR004843;IPR006186;IPR031675;IPR029052;	Calcineurin-like phosphoesterase domain, ApaH type;Serine/threonine-specific protein phosphatase/bis(5-nucleosyl)-tetraphosphatase;Serine-threonine protein phosphatase, N-terminal;Metallo-dependent phosphatase-like;	nucleus	SPBC776.02c	602	TR	[T] Signal transduction mechanisms;[R] General function prediction only;
T5A6C4	HAD-like domain protein OS=Ophiocordyceps sinensis (strain Co18 / CGMCC 3.14243) OX=911162 GN=OCS_03257 PE=4 SV=1	up	1.707	1.522	1.611	1.079	0.67	0.604	0.638	0.659	0.829	0.707	0.657	0.959	2.30224	0.000967382	0.81567	0.0800023	1.87786	0.00418521													IPR006439;IPR023214;IPR023198;	HAD hydrolase, subfamily IA;HAD-like domain;Phosphoglycolate phosphatase, domain 2;	cytosol	152968149	150	GR	[G] Carbohydrate transport and metabolism; [R] General function prediction only;	COG0637	Beta-phosphoglucomutase or related phosphatase, HAD superfamily
T5AJT4	Uncharacterized protein OS=Ophiocordyceps sinensis (strain Co18 / CGMCC 3.14243) OX=911162 GN=OCS_02204 PE=4 SV=1	up	1.491	nan	1.843	nan	0.752	nan	0.697	nan	0.891	nan	0.922	nan	2.30091	0.0339153	0.79923	0.028791	1.83894	0.0499632													IPR027417;	P-loop containing nucleoside triphosphate hydrolase;	mitochondria
T5AI41	1,3-beta-glucanosyltransferase OS=Ophiocordyceps sinensis (strain Co18 / CGMCC 3.14243) OX=911162 GN=OCS_02033 PE=3 SV=1	up	2.066	1.682	1.671	1.365	0.729	0.734	0.725	0.762	0.776	0.75	0.594	0.727	2.29964	0.000551539	1.03618	0.556483	2.38286	0.000582256										K22836			IPR004886;IPR017853;	Glucanosyltransferase;Glycoside hydrolase superfamily;	extracellular
T5AC49	Glycoprotein suaprga1 OS=Ophiocordyceps sinensis (strain Co18 / CGMCC 3.14243) OX=911162 GN=OCS_04151 PE=4 SV=1	up	2.151	1.795	1.927	1.411	0.681	0.859	0.737	0.892	0.758	0.633	0.526	0.597	2.29853	0.000737969	1.26054	0.0568363	2.89737	0.00032833										K15414	map05168;	Herpes simplex infection;	IPR003428;	Mitochondrial glycoprotein;	mitochondria	YIL070c	99.4	C	[C] Energy production and conversion;
T5AMX3	Eukaryotic translation initiation factor 2 beta subunit OS=Ophiocordyceps sinensis (strain Co18 / CGMCC 3.14243) OX=911162 GN=OCS_00535 PE=4 SV=1	up	2.339	1.712	1.98	1.328	0.694	0.818	0.768	0.937	0.684	0.635	0.6	0.786	2.28754	0.0032697	1.18928	0.0969761	2.72052	0.00173834	GO:0044238;GO:1901564;GO:0044249;GO:0034641;GO:0006807;GO:0044237;GO:0034645;GO:0043170;GO:1901576;GO:0044260;GO:0043043;GO:0071704;GO:0010467;GO:0002181;GO:0002183;GO:0044267;GO:0009987;GO:0009058;GO:0009059;GO:0008150;GO:0008152;GO:0044271;GO:0043604;GO:1901566;GO:0019538;GO:0043603;GO:0006518;GO:0006413;GO:0006412;	primary metabolic process;organonitrogen compound metabolic process;cellular biosynthetic process;cellular nitrogen compound metabolic process;nitrogen compound metabolic process;cellular metabolic process;cellular macromolecule biosynthetic process;macromolecule metabolic process;organic substance biosynthetic process;cellular macromolecule metabolic process;peptide biosynthetic process;organic …	3;4;4;4;3;3;5;4;4;4;6;3;5;7;5;5;2;3;5;1;2;5;6;5;4;5;5;4;6;	GO:0044464;GO:0005737;GO:0043614;GO:0030529;GO:0043234;GO:0032991;GO:0005850;GO:0005829;GO:1990904;GO:0005623;GO:0005622;GO:0005575;GO:0044444;GO:0044424;	cell part;cytoplasm;multi-eIF complex;intracellular ribonucleoprotein complex;protein complex;macromolecular complex;eukaryotic translation initiation factor 2 complex;cytosol;ribonucleoprotein complex;cell;intracellular;cellular_component;cytoplasmic part;intracellular part;	2;4;5;4;3;2;4;5;3;2;3;1;4;3;	GO:0003676;GO:0043169;GO:0003674;GO:1901363;GO:0046872;GO:0003723;GO:0008135;GO:0043167;GO:0097159;GO:0003743;GO:0005488;	nucleic acid binding;cation binding;molecular_function;heterocyclic compound binding;metal ion binding;RNA binding;translation factor activity, RNA binding;ion binding;organic cyclic compound binding;translation initiation factor activity;binding;	4;4;1;3;5;5;6;3;3;7;2;	K03238	map03013;	RNA transport;	IPR016189;IPR002735;IPR016190;	Translation initiation factor IF2/IF5, N-terminal;Translation initiation factor IF2/IF5;Translation initiation factor IF2/IF5, zinc-binding;	nucleus	SPAC6B12.17c	213	J	[J] Translation, ribosomal structure and biogenesis;
T5AK80	Oxysterol binding protein OS=Ophiocordyceps sinensis (strain Co18 / CGMCC 3.14243) OX=911162 GN=OCS_01282 PE=3 SV=1	up	2.491	1.892	1.717	1.31	0.735	0.778	0.822	0.907	0.783	0.738	0.703	0.942	2.28561	0.00567676	1.02401	0.777588	2.34049	0.00550615	GO:0006887;GO:0015918;GO:0006869;GO:0044699;GO:0015850;GO:0071702;GO:0033036;GO:0006810;GO:0044765;GO:0008150;GO:0006897;GO:0051234;GO:0010876;GO:0051179;GO:1902578;GO:0046903;GO:0016192;GO:0032940;GO:0044763;GO:0009987;	exocytosis;sterol transport;lipid transport;single-organism process;organic hydroxy compound transport;organic substance transport;macromolecule localization;transport;single-organism transport;biological_process;endocytosis;establishment of localization;lipid localization;localization;single-organism localization;secretion;vesicle-mediated transport;secretion by cell;single-organism cellular pro…	5;6;5;2;5;5;3;4;4;1;6;3;4;2;3;5;5;4;3;2;	GO:0005783;GO:0043229;GO:0043227;GO:0043226;GO:0005737;GO:0012505;GO:0043231;GO:0043234;GO:0032991;GO:0005829;GO:0044464;GO:0005623;GO:0005622;GO:0005575;GO:0044444;GO:0044424;	endoplasmic reticulum;intracellular organelle;membrane-bounded organelle;organelle;cytoplasm;endomembrane system;intracellular membrane-bounded organelle;protein complex;macromolecular complex;cytosol;cell part;cell;intracellular;cellular_component;cytoplasmic part;intracellular part;	4;3;3;2;4;3;4;3;2;5;2;2;3;1;4;3;	GO:0008142;GO:0003674;GO:0005488;GO:0005545;GO:0043167;GO:0043168;GO:0032934;GO:0008289;GO:0036094;GO:0005496;GO:0005543;GO:0043178;GO:0035091;GO:0097159;	oxysterol binding;molecular_function;binding;1-phosphatidylinositol binding;ion binding;anion binding;sterol binding;lipid binding;small molecule binding;steroid binding;phospholipid binding;alcohol binding;phosphatidylinositol binding;organic cyclic compound binding;	6;1;2;6;3;4;5;3;3;4;4;4;5;3;	K20456			IPR000648;IPR002110;IPR020683;IPR001849;IPR011993;IPR018494;	Oxysterol-binding protein;Ankyrin repeat;Ankyrin repeat-containing domain;Pleckstrin homology domain;PH domain-like;Oxysterol-binding protein, conserved site;	nucleus	SPBC2F12.05c_2	483	I	[I] Lipid transport and metabolism;
T5AKA3	Complex I intermediate-associated protein 30 OS=Ophiocordyceps sinensis (strain Co18 / CGMCC 3.14243) OX=911162 GN=OCS_01258 PE=4 SV=1	up	nan	1.665	1.902	nan	nan	0.813	0.752	nan	nan	0.854	0.834	nan	2.27925	0.0146158	0.92713	0.195425	2.11315	0.0156472													IPR008979;IPR013857;	Galactose-binding domain-like;NADH:ubiquinone oxidoreductase intermediate-associated protein 30;	mitochondria	428216379	73.2	R	[R] General function prediction only;	COG0702	Uncharacterized conserved protein YbjT, contains NAD(P)-binding and DUF2867 domains
T4ZYG3	GPN-loop GTPase 3 OS=Ophiocordyceps sinensis (strain Co18 / CGMCC 3.14243) OX=911162 GN=OCS_06120 PE=3 SV=1	up	nan	1.924	1.687	nan	nan	0.764	0.822	nan	nan	0.638	0.758	nan	2.27682	0.0142093	1.1361	0.290075	2.58668	0.0140805	GO:0034504;GO:0051169;GO:0008104;GO:0015833;GO:0015031;GO:0034629;GO:0044699;GO:0042886;GO:0070727;GO:0006886;GO:0071705;GO:0006810;GO:0071702;GO:0033036;GO:0034613;GO:1902593;GO:0072594;GO:0008150;GO:0017038;GO:0006606;GO:0006913;GO:0006605;GO:0045184;GO:0044765;GO:0051170;GO:0051649;GO:0044744;GO:0051234;GO:0051179;GO:1902578;GO:0051641;GO:0031503;GO:0046907;GO:1990022;GO:0044376;GO:0033365;GO:…	protein localization to nucleus;nuclear transport;protein localization;peptide transport;protein transport;cellular protein complex localization;single-organism process;amide transport;cellular macromolecule localization;intracellular protein transport;nitrogen compound transport;transport;organic substance transport;macromolecule localization;cellular protein localization;single-organism nuclear…	7;6;4;6;5;6;2;5;4;6;5;4;5;3;5;6;5;1;5;5;7;6;4;4;8;4;5;3;2;3;3;5;5;7;6;6;5;4;	GO:0005829;GO:0044424;GO:0043226;GO:0005737;GO:0043227;GO:0043231;GO:0044464;GO:0043229;GO:0005623;GO:0005622;GO:0005575;GO:0044444;GO:0005634;	cytosol;intracellular part;organelle;cytoplasm;membrane-bounded organelle;intracellular membrane-bounded organelle;cell part;intracellular organelle;cell;intracellular;cellular_component;cytoplasmic part;nucleus;	5;3;2;4;3;4;2;3;2;3;1;4;5;	GO:0035639;GO:0019001;GO:1901363;GO:0003674;GO:0001883;GO:0043167;GO:0001882;GO:0032555;GO:0032549;GO:0000166;GO:0032561;GO:1901265;GO:0017076;GO:0005525;GO:0016787;GO:0003824;GO:0036094;GO:0097367;GO:0097159;GO:0043168;GO:0032550;GO:0032553;GO:0005488;	purine ribonucleoside triphosphate binding;guanyl nucleotide binding;heterocyclic compound binding;molecular_function;purine nucleoside binding;ion binding;nucleoside binding;purine ribonucleotide binding;ribonucleoside binding;nucleotide binding;guanyl ribonucleotide binding;nucleoside phosphate binding;purine nucleotide binding;GTP binding;hydrolase activity;catalytic activity;small molecule bi…	5;6;3;1;5;3;4;5;5;4;6;4;5;6;3;2;3;3;3;4;6;4;2;	K24104			IPR004130;IPR027417;IPR030228;	GPN-loop GTPase;P-loop containing nucleoside triphosphate hydrolase;GPN-loop GTPase 3;	cytosol, mitochondria	SPAC4D7.12c	297	K	[K] Transcription;
T5A948	60S ribosomal protein L36 OS=Ophiocordyceps sinensis (strain Co18 / CGMCC 3.14243) OX=911162 GN=OCS_02276 PE=3 SV=1	up	2.734	1.619	1.912	1.392	0.597	0.876	0.899	0.993	0.734	0.676	0.448	0.489	2.27547	0.0126167	1.43375	0.0602859	3.26246	0.00454913	GO:1901564;GO:0044249;GO:0006807;GO:0044237;GO:0034645;GO:1901576;GO:0044260;GO:0043043;GO:0071704;GO:0010467;GO:1901566;GO:0043170;GO:0044267;GO:0009987;GO:0009058;GO:0009059;GO:0008150;GO:0008152;GO:0044271;GO:0043604;GO:0044238;GO:0019538;GO:0034641;GO:0043603;GO:0006518;GO:0006412;	organonitrogen compound metabolic process;cellular biosynthetic process;nitrogen compound metabolic process;cellular metabolic process;cellular macromolecule biosynthetic process;organic substance biosynthetic process;cellular macromolecule metabolic process;peptide biosynthetic process;organic substance metabolic process;gene expression;organonitrogen compound biosynthetic process;macromolecule …	4;4;3;3;5;4;4;6;3;5;5;4;5;2;3;5;1;2;5;6;3;4;4;5;5;6;	GO:0044464;GO:0043229;GO:0030529;GO:0043226;GO:0005737;GO:0032991;GO:0005840;GO:0043232;GO:1990904;GO:0005623;GO:0005622;GO:0005575;GO:0044444;GO:0043228;GO:0044424;	cell part;intracellular organelle;intracellular ribonucleoprotein complex;organelle;cytoplasm;macromolecular complex;ribosome;intracellular non-membrane-bounded organelle;ribonucleoprotein complex;cell;intracellular;cellular_component;cytoplasmic part;non-membrane-bounded organelle;intracellular part;	2;3;4;2;4;2;5;4;3;2;3;1;4;3;3;	GO:0003674;GO:0005198;GO:0003735;	molecular_function;structural molecule activity;structural constituent of ribosome;	1;2;3;	K02920	map03010;	Ribosome;	IPR000509;	Ribosomal protein L36e;	mitochondria	SPBC405.07	125	J	[J] Translation, ribosomal structure and biogenesis;
T5AGP5	Prefoldin beta-like protein OS=Ophiocordyceps sinensis (strain Co18 / CGMCC 3.14243) OX=911162 GN=OCS_03353 PE=4 SV=1	up	1.805	nan	nan	1.688	0.801	nan	nan	0.74	0.785	nan	nan	0.701	2.2667	0.00453811	1.03701	0.649183	2.35061	0.00511069	GO:0007021;GO:0006461;GO:0006457;GO:0071822;GO:0070271;GO:0043933;GO:0009987;GO:0016043;GO:0065003;GO:0022607;GO:0008150;GO:0034622;GO:0043623;GO:0071840;GO:0044085;	tubulin complex assembly;protein complex assembly;protein folding;protein complex subunit organization;protein complex biogenesis;macromolecular complex subunit organization;cellular process;cellular component organization;macromolecular complex assembly;cellular component assembly;biological_process;cellular macromolecular complex assembly;cellular protein complex assembly;cellular component org…	7;5;3;5;4;4;2;3;5;4;1;6;6;2;3;	GO:0043234;GO:0005575;GO:0016272;GO:0032991;	protein complex;cellular_component;prefoldin complex;macromolecular complex;	3;1;4;2;				K09549			IPR002777;IPR027235;	Prefoldin beta-like;Prefoldin subunit 2;	nucleus	SPAC227.10	121	O	[O] Posttranslational modification, protein turnover, chaperones;
T5AFE2	Proteasome regulatory particle, non-ATPase-like protein OS=Ophiocordyceps sinensis (strain Co18 / CGMCC 3.14243) OX=911162 GN=OCS_02981 PE=4 SV=1	up	1.847	1.613	nan	1.742	0.696	0.816	nan	0.783	0.731	0.787	nan	0.57	2.26665	0.000224282	1.09914	0.405273	2.49138	0.000380136	GO:0032436;GO:0080090;GO:0019222;GO:0010965;GO:0071840;GO:0032434;GO:0051246;GO:0048518;GO:0007088;GO:0060255;GO:0030162;GO:0030163;GO:1902099;GO:1903364;GO:0019538;GO:0010638;GO:0051783;GO:0051781;GO:0051785;GO:0044784;GO:0009896;GO:0045840;GO:0009894;GO:0045842;GO:0009893;GO:0007067;GO:0030071;GO:0044267;GO:0007346;GO:0044265;GO:0044260;GO:0016043;GO:0065007;GO:0044699;GO:1901800;GO:0051130;GO:…	positive regulation of proteasomal ubiquitin-dependent protein catabolic process;regulation of primary metabolic process;regulation of metabolic process;regulation of mitotic sister chromatid separation;cellular component organization or biogenesis;regulation of proteasomal ubiquitin-dependent protein catabolic process;regulation of protein metabolic process;positive regulation of biological proc…	8;4;3;7;2;8;5;2;6;4;6;5;6;6;4;5;5;4;5;6;4;6;4;6;3;5;7;5;5;5;4;3;2;2;7;4;3;6;1;2;4;6;6;6;5;8;5;6;6;5;6;5;5;4;4;5;6;6;4;7;6;5;5;5;7;5;7;2;7;6;4;4;5;5;5;4;6;5;4;4;4;5;5;6;4;6;6;5;4;4;2;3;5;5;6;5;7;4;3;3;5;4;3;6;5;4;4;3;4;5;7;6;3;	GO:0005838;GO:0000502;GO:0043234;GO:0043231;GO:0005829;GO:0044424;GO:0043229;GO:0005622;GO:0043227;GO:0044444;GO:0005737;GO:0005634;GO:0043226;GO:0044464;GO:0005623;GO:0022624;GO:0032991;GO:0005575;GO:0008541;	proteasome regulatory particle;proteasome complex;protein complex;intracellular membrane-bounded organelle;cytosol;intracellular part;intracellular organelle;intracellular;membrane-bounded organelle;cytoplasmic part;cytoplasm;nucleus;organelle;cell part;cell;proteasome accessory complex;macromolecular complex;cellular_component;proteasome regulatory particle, lid subcomplex;	4;4;3;4;5;3;3;3;3;4;4;5;2;2;2;4;2;1;4;				K03037	map03050;map05169;	Proteasome;Epstein-Barr virus infection;	IPR000717;IPR035268;IPR019585;IPR011991;	Proteasome component (PCI) domain;26S Proteasome non-ATPase regulatory subunit 6;26S proteasome regulatory subunit Rpn7/COP9 signalosome complex subunit 1;Winged helix-turn-helix DNA-binding domain;	cytosol	SPBC582.07c	306	O	[O] Posttranslational modification, protein turnover, chaperones;
T5ADK3	NSF attachment protein OS=Ophiocordyceps sinensis (strain Co18 / CGMCC 3.14243) OX=911162 GN=OCS_03791 PE=4 SV=1	up	2.611	0.942	2.176	1.342	0.604	0.964	0.704	0.854	0.793	1.124	0.727	0.86	2.26198	0.0444039	0.89212	0.453546	2.01798	0.0625874	GO:0008104;GO:0043933;GO:0070317;GO:0070316;GO:0061024;GO:0010948;GO:0022402;GO:0071840;GO:0050789;GO:0044699;GO:0032984;GO:0043624;GO:0045786;GO:0071822;GO:0070727;GO:0043241;GO:0006886;GO:0010564;GO:0016043;GO:0035494;GO:0065007;GO:0007049;GO:0071702;GO:0048519;GO:0033036;GO:0034613;GO:0009987;GO:0006810;GO:0050794;GO:0045184;GO:0008150;GO:0051649;GO:0051234;GO:0045023;GO:0051179;GO:0051641;GO:…	protein localization;macromolecular complex subunit organization;negative regulation of G0 to G1 transition;regulation of G0 to G1 transition;membrane organization;negative regulation of cell cycle process;cell cycle process;cellular component organization or biogenesis;regulation of biological process;single-organism process;macromolecular complex disassembly;cellular protein complex disassembly…	4;4;6;6;4;5;4;2;2;2;5;7;4;5;4;6;6;5;3;6;2;4;5;2;3;5;2;4;3;4;1;4;3;5;2;3;5;5;4;5;3;4;3;5;	GO:0043226;GO:0044425;GO:0043227;GO:0005737;GO:0044446;GO:0031090;GO:0005773;GO:0016020;GO:0005774;GO:0044437;GO:0031201;GO:0098588;GO:0044424;GO:0043234;GO:0032991;GO:0043231;GO:0044464;GO:0043229;GO:0005623;GO:0005622;GO:0005575;GO:0098796;GO:0044444;GO:0044422;GO:0098805;	organelle;membrane part;membrane-bounded organelle;cytoplasm;intracellular organelle part;organelle membrane;vacuole;membrane;vacuolar membrane;vacuolar part;SNARE complex;bounding membrane of organelle;intracellular part;protein complex;macromolecular complex;intracellular membrane-bounded organelle;cell part;intracellular organelle;cell;intracellular;cellular_component;membrane protein complex;…	2;2;3;4;3;3;5;2;4;4;4;4;3;3;2;4;2;3;2;3;1;3;4;2;3;	GO:0019905;GO:0003674;GO:0005488;GO:0005483;GO:0000149;GO:0005515;	syntaxin binding;molecular_function;binding;soluble NSF attachment protein activity;SNARE binding;protein binding;	5;1;2;4;4;3;	K15296	map04721;	Synaptic vesicle cycle;	IPR000744;IPR011990;	NSF attachment protein;Tetratricopeptide-like helical domain;	nucleus	SPAC959.02	278	U	[U] Intracellular trafficking, secretion, and vesicular transport;
T5AA39	Extracellular membrane protein, 8-cysteine region, CFEM OS=Ophiocordyceps sinensis (strain Co18 / CGMCC 3.14243) OX=911162 GN=OCS_01940 PE=4 SV=1	up	3.112	1.584	2.374	1.116	0.692	1.047	0.81	1.072	0.751	0.951	0.564	0.892	2.2607	0.0441484	1.14661	0.394703	2.59215	0.030992													IPR008427;	Extracellular membrane protein, CFEM domain;	extracellular	470166366	75.5	D	[D] Cell cycle control, cell division, chromosome partitioning;	COG3087	Cell division protein FtsN
T5ADJ4	40S ribosomal protein S6 OS=Ophiocordyceps sinensis (strain Co18 / CGMCC 3.14243) OX=911162 GN=OCS_04480 PE=3 SV=1	up	2.037	1.695	1.397	1.379	0.756	0.713	0.732	0.689	0.796	0.684	0.592	0.841	2.2519	0.00112813	0.9921	0.924147	2.23412	0.00157023	GO:0044249;GO:0034641;GO:0006807;GO:0034645;GO:0071840;GO:1901576;GO:0044260;GO:0043043;GO:0042254;GO:0071704;GO:0010467;GO:0002181;GO:0044267;GO:0009987;GO:0022613;GO:0009058;GO:0009059;GO:0008150;GO:0008152;GO:0044271;GO:0043604;GO:0044238;GO:1901564;GO:0043603;GO:1901566;GO:0019538;GO:0044237;GO:0043170;GO:0006518;GO:0006412;GO:0044085;	cellular biosynthetic process;cellular nitrogen compound metabolic process;nitrogen compound metabolic process;cellular macromolecule biosynthetic process;cellular component organization or biogenesis;organic substance biosynthetic process;cellular macromolecule metabolic process;peptide biosynthetic process;ribosome biogenesis;organic substance metabolic process;gene expression;cytoplasmic trans…	4;4;3;5;2;4;4;6;5;3;5;7;5;2;4;3;5;1;2;5;6;3;4;5;5;4;3;4;5;6;3;	GO:0022626;GO:0015935;GO:1990904;GO:0043232;GO:0005623;GO:0005622;GO:0043226;GO:0022627;GO:0005737;GO:0044445;GO:0032991;GO:0030529;GO:0044446;GO:0044391;GO:0005840;GO:0005829;GO:0044464;GO:0043229;GO:0005575;GO:0044444;GO:0043228;GO:0044424;GO:0044422;	cytosolic ribosome;small ribosomal subunit;ribonucleoprotein complex;intracellular non-membrane-bounded organelle;cell;intracellular;organelle;cytosolic small ribosomal subunit;cytoplasm;cytosolic part;macromolecular complex;intracellular ribonucleoprotein complex;intracellular organelle part;ribosomal subunit;ribosome;cytosol;cell part;intracellular organelle;cellular_component;cytoplasmic part;…	6;5;3;4;2;3;2;6;4;5;2;4;3;4;5;5;2;3;1;4;3;3;2;	GO:0003674;GO:0005198;GO:0003735;	molecular_function;structural molecule activity;structural constituent of ribosome;	1;2;3;	K02991	map03010;map04066;map04150;map04151;map04910;map05205;	Ribosome;HIF-1 signaling pathway;mTOR signaling pathway;PI3K-Akt signaling pathway;Insulin signaling pathway;Proteoglycans in cancer;	IPR014401;IPR018282;IPR001377;	Ribosomal protein S6, eukaryotic;Ribosomal protein S6e, conserved site;Ribosomal protein S6e;	nucleus	SPAPB1E7.12	375	J	[J] Translation, ribosomal structure and biogenesis;
T5A8A1	Glycoside hydrolase family 16 protein OS=Ophiocordyceps sinensis (strain Co18 / CGMCC 3.14243) OX=911162 GN=OCS_05475 PE=4 SV=1	up	2.005	1.366	2.181	1.27	0.779	0.878	0.662	0.751	1.126	1.062	0.654	1.04	2.22217	0.00674472	0.79083	0.130522	1.75734	0.0264961	GO:0071840;GO:0071704;GO:0016043;GO:0071554;GO:0071555;GO:0045229;GO:0009987;GO:0008150;GO:0008152;GO:0044238;GO:0005975;	cellular component organization or biogenesis;organic substance metabolic process;cellular component organization;cell wall organization or biogenesis;cell wall organization;external encapsulating structure organization;cellular process;biological_process;metabolic process;primary metabolic process;carbohydrate metabolic process;	2;3;3;3;4;4;2;1;2;3;4;	GO:0071944;GO:0031225;GO:0005618;GO:0016020;GO:0031224;GO:0044425;GO:0030312;GO:0005886;GO:0044464;GO:0005623;GO:0005575;GO:0005576;GO:0009277;	cell periphery;anchored component of membrane;cell wall;membrane;intrinsic component of membrane;membrane part;external encapsulating structure;plasma membrane;cell part;cell;cellular_component;extracellular region;fungal-type cell wall;	3;4;4;2;3;2;3;3;2;2;1;2;5;	GO:0016798;GO:0044877;GO:0005488;GO:0032403;GO:0016787;GO:0003824;GO:0019863;GO:0019865;GO:0005515;GO:0004553;GO:0003674;	hydrolase activity, acting on glycosyl bonds;macromolecular complex binding;binding;protein complex binding;hydrolase activity;catalytic activity;IgE binding;immunoglobulin binding;protein binding;hydrolase activity, hydrolyzing O-glycosyl compounds;molecular_function;	4;3;2;4;3;2;6;5;3;5;1;				IPR013320;IPR000757;	Concanavalin A-like lectin/glucanase domain;Glycoside hydrolase family 16;	extracellular	YGR189c	62.4	M	[M] Cell wall/membrane/envelope biogenesis;
T5AGV5	Flavohemoglobin OS=Ophiocordyceps sinensis (strain Co18 / CGMCC 3.14243) OX=911162 GN=OCS_02673 PE=3 SV=1	up	2.003	1.843	1.5	2.142	0.779	0.805	1.136	0.653	0.937	0.875	0.836	0.861	2.22	0.000993466	0.96124	0.757713	2.13394	0.000388785	GO:0042221;GO:0009636;GO:0006950;GO:0008150;GO:0051409;GO:0050896;	response to chemical;response to toxic substance;response to stress;biological_process;response to nitrosative stress;response to stimulus;	3;4;3;1;4;2;				GO:0008941;GO:0005344;GO:0003674;GO:0005488;GO:0000166;GO:1901363;GO:1901265;GO:0016491;GO:0043168;GO:0043169;GO:0050660;GO:0016708;GO:0016705;GO:0043167;GO:0071949;GO:0046872;GO:0020037;GO:0050662;GO:0005215;GO:0036094;GO:0003824;GO:0022892;GO:0019825;GO:0051213;GO:0046906;GO:0097159;GO:0048037;	nitric oxide dioxygenase activity;oxygen transporter activity;molecular_function;binding;nucleotide binding;heterocyclic compound binding;nucleoside phosphate binding;oxidoreductase activity;anion binding;cation binding;flavin adenine dinucleotide binding;oxidoreductase activity, acting on paired donors, with incorporation or reduction of molecular oxygen, NAD(P)H as one donor, and incorporation …	6;4;1;2;4;3;4;3;4;4;5;5;4;3;6;5;5;4;2;3;2;3;3;4;4;3;3;	K05916	map05132;	Salmonella infection;	IPR017927;IPR000971;IPR009050;IPR017938;IPR001433;	Ferredoxin reductase-type FAD-binding domain;Globin;Globin-like;Riboflavin synthase-like beta-barrel;Oxidoreductase FAD/NAD(P)-binding;	cytosol	311105546	290	C	[C] Energy production and conversion;	COG1018	Ferredoxin-NADP reductase
T5AF00	Amino acid transporter, transmembrane OS=Ophiocordyceps sinensis (strain Co18 / CGMCC 3.14243) OX=911162 GN=OCS_03295 PE=4 SV=1	up	1.093	1.686	1.433	1.438	0.759	0.54	0.483	0.768	1.201	0.916	0.96	1.13	2.21567	0.00159519	0.60613	0.00611013	1.343	0.0413325	GO:0006868;GO:0006865;GO:1903825;GO:0015803;GO:0006820;GO:1905039;GO:0044699;GO:0055085;GO:0071705;GO:0015849;GO:0003333;GO:0006810;GO:0098656;GO:0006812;GO:0006811;GO:0009987;GO:0015711;GO:0015804;GO:0034220;GO:0044765;GO:0015807;GO:0008150;GO:0015801;GO:0051234;GO:0051179;GO:1902578;GO:0046942;GO:0071702;GO:1902475;GO:0015828;GO:0044763;GO:0098655;	glutamine transport;amino acid transport;organic acid transmembrane transport;branched-chain amino acid transport;anion transport;carboxylic acid transmembrane transport;single-organism process;transmembrane transport;nitrogen compound transport;organic acid transport;amino acid transmembrane transport;transport;anion transmembrane transport;cation transport;ion transport;cellular process;organic…	7;6;5;7;6;6;2;4;5;5;7;4;6;6;5;2;6;7;5;4;7;1;7;3;2;3;6;5;8;7;3;6;	GO:0043231;GO:0016021;GO:0005774;GO:0043227;GO:0043226;GO:0044422;GO:0005737;GO:0005575;GO:0031090;GO:0005773;GO:0016020;GO:0044444;GO:0044437;GO:0098588;GO:0044446;GO:0044425;GO:0098805;GO:0044464;GO:0043229;GO:0005623;GO:0031224;GO:0044424;GO:0005622;	intracellular membrane-bounded organelle;integral component of membrane;vacuolar membrane;membrane-bounded organelle;organelle;organelle part;cytoplasm;cellular_component;organelle membrane;vacuole;membrane;cytoplasmic part;vacuolar part;bounding membrane of organelle;intracellular organelle part;membrane part;whole membrane;cell part;intracellular organelle;cell;intrinsic component of membrane;i…	4;4;4;3;2;2;4;1;3;5;2;4;4;4;3;2;3;2;3;2;3;3;3;	GO:0015175;GO:0005342;GO:0005302;GO:0003674;GO:0015188;GO:0015186;GO:0008509;GO:0005215;GO:0046943;GO:0015658;GO:0008324;GO:0022891;GO:0022892;GO:0008514;GO:0015075;GO:0022857;GO:0015179;GO:0015171;GO:0015173;	neutral amino acid transmembrane transporter activity;organic acid transmembrane transporter activity;L-tyrosine transmembrane transporter activity;molecular_function;L-isoleucine transmembrane transporter activity;L-glutamine transmembrane transporter activity;anion transmembrane transporter activity;transporter activity;carboxylic acid transmembrane transporter activity;branched-chain amino aci…	8;5;7;1;7;7;6;2;6;8;6;4;3;7;5;3;8;7;8;				IPR013154;IPR002328;IPR013057;IPR011032;	Alcohol dehydrogenase, N-terminal;Alcohol dehydrogenase, zinc-type, conserved site;Amino acid transporter, transmembrane domain;GroES-like;	plasma membrane	YMR303c	208	Q	[Q] Secondary metabolites biosynthesis, transport and catabolism;
T5ABW5	Xanthine phosphoribosyltransferase 1 OS=Ophiocordyceps sinensis (strain Co18 / CGMCC 3.14243) OX=911162 GN=OCS_01347 PE=4 SV=1	up	1.943	1.869	1.795	1.617	0.78	0.723	0.814	0.975	0.837	0.606	0.644	0.744	2.19443	3.13691e-05	1.16284	0.175206	2.55175	1.52291e-05	GO:0009165;GO:0006144;GO:1901135;GO:0046390;GO:0009117;GO:0044249;GO:0034641;GO:0006807;GO:0044237;GO:0009161;GO:0072521;GO:0072522;GO:1901362;GO:0009259;GO:0009124;GO:0006139;GO:0044711;GO:1901657;GO:0009126;GO:1901360;GO:0009127;GO:0071704;GO:0044699;GO:0019637;GO:0043101;GO:0006163;GO:0018130;GO:0009112;GO:0046100;GO:0009167;GO:1901576;GO:0009156;GO:0009168;GO:0009987;GO:0006725;GO:0044710;GO:…	nucleotide biosynthetic process;purine nucleobase metabolic process;carbohydrate derivative metabolic process;ribose phosphate biosynthetic process;nucleotide metabolic process;cellular biosynthetic process;cellular nitrogen compound metabolic process;nitrogen compound metabolic process;cellular metabolic process;ribonucleoside monophosphate metabolic process;purine-containing compound metabolic …	6;6;4;6;6;4;4;3;3;7;5;6;5;6;6;4;4;4;7;4;7;3;2;4;6;6;5;5;7;8;4;7;8;2;4;3;8;3;1;5;2;5;5;4;7;5;4;4;5;3;5;8;5;7;5;6;7;7;3;5;6;5;4;5;5;9;8;4;	GO:0005737;GO:0044464;GO:0005623;GO:0005622;GO:0005575;GO:0044424;	cytoplasm;cell part;cell;intracellular;cellular_component;intracellular part;	4;2;2;3;1;3;	GO:0003674;GO:0004422;GO:0016740;GO:0016763;GO:0000310;GO:0003824;GO:0016757;	molecular_function;hypoxanthine phosphoribosyltransferase activity;transferase activity;transferase activity, transferring pentosyl groups;xanthine phosphoribosyltransferase activity;catalytic activity;transferase activity, transferring glycosyl groups;	1;6;3;5;6;2;4;	K07101			IPR000836;IPR029057;	Phosphoribosyltransferase domain;Phosphoribosyltransferase-like;	cytosol	302337398	130	H	[H] Coenzyme transport and metabolism;	COG2236	Hypoxanthine phosphoribosyltransferase
T5A755	Ureohydrolase OS=Ophiocordyceps sinensis (strain Co18 / CGMCC 3.14243) OX=911162 GN=OCS_06711 PE=3 SV=1	up	nan	2.079	1.401	1.655	nan	0.68	0.724	0.937	nan	0.677	0.653	0.487	2.19351	0.0119623	1.28839	0.153486	2.82609	0.00587116	GO:0009065;GO:0019752;GO:0044248;GO:0006807;GO:0044282;GO:0009064;GO:0044699;GO:0044712;GO:0044710;GO:0006520;GO:0006527;GO:0006525;GO:0071704;GO:1901605;GO:1901606;GO:0044238;GO:0009987;GO:1901575;GO:0008150;GO:0008152;GO:0043436;GO:0009056;GO:0009063;GO:1901564;GO:1901565;GO:0006082;GO:0044237;GO:0046395;GO:0044763;GO:0016054;GO:0044281;	glutamine family amino acid catabolic process;carboxylic acid metabolic process;cellular catabolic process;nitrogen compound metabolic process;small molecule catabolic process;glutamine family amino acid metabolic process;single-organism process;single-organism catabolic process;single-organism metabolic process;cellular amino acid metabolic process;arginine catabolic process;arginine metabolic p…	7;6;4;3;5;6;2;4;3;4;8;7;3;5;6;3;2;4;1;2;5;3;5;4;5;4;3;6;3;5;4;				GO:0003674;GO:0005488;GO:0043169;GO:0043167;GO:0046872;GO:0016787;GO:0003824;GO:0047971;GO:0016813;GO:0016810;	molecular_function;binding;cation binding;ion binding;metal ion binding;hydrolase activity;catalytic activity;guanidinobutyrase activity;hydrolase activity, acting on carbon-nitrogen (but not peptide) bonds, in linear amidines;hydrolase activity, acting on carbon-nitrogen (but not peptide) bonds;	1;2;4;3;5;3;2;6;5;4;	K01480	map00330;map01100;	Arginine and proline metabolism;Metabolic pathways;	IPR006035;IPR020855;	Ureohydrolase;Ureohydrolase, manganese-binding site;	extracellular	SPBC8E4.03	384	E	[E] Amino acid transport and metabolism;
T5AEJ7	RHO protein GDP dissociation inhibitor containing protein OS=Ophiocordyceps sinensis (strain Co18 / CGMCC 3.14243) OX=911162 GN=OCS_03448 PE=4 SV=1	up	1.435	1.73	nan	1.541	0.827	0.664	nan	0.655	0.858	0.636	nan	0.623	2.19293	0.0011501	1.0137	0.923487	2.22296	0.00169535	GO:0043933;GO:0030036;GO:0007165;GO:0035556;GO:0050789;GO:0071840;GO:0051716;GO:0071822;GO:1902589;GO:0016043;GO:0065007;GO:0044699;GO:0065009;GO:0050790;GO:0030029;GO:0044700;GO:0009987;GO:0050794;GO:0008150;GO:0023052;GO:0007154;GO:0007264;GO:0006996;GO:0007015;GO:0007010;GO:0044763;GO:0050896;	macromolecular complex subunit organization;actin cytoskeleton organization;signal transduction;intracellular signal transduction;regulation of biological process;cellular component organization or biogenesis;cellular response to stimulus;protein complex subunit organization;single-organism organelle organization;cellular component organization;biological regulation;single-organism process;regula…	4;5;4;5;2;2;3;5;4;3;2;2;3;4;4;3;2;3;1;2;4;6;4;6;5;3;2;	GO:0043229;GO:0043227;GO:0005737;GO:0005634;GO:0043226;GO:0043231;GO:0005829;GO:0044464;GO:0005623;GO:0005622;GO:0005575;GO:0044444;GO:0044424;	intracellular organelle;membrane-bounded organelle;cytoplasm;nucleus;organelle;intracellular membrane-bounded organelle;cytosol;cell part;cell;intracellular;cellular_component;cytoplasmic part;intracellular part;	3;3;4;5;2;4;5;2;2;3;1;4;3;	GO:0003674;GO:0098772;GO:0005092;GO:0030234;GO:0005094;GO:0030695;GO:0060589;	molecular_function;molecular function regulator;GDP-dissociation inhibitor activity;enzyme regulator activity;Rho GDP-dissociation inhibitor activity;GTPase regulator activity;nucleoside-triphosphatase regulator activity;	1;2;6;3;7;5;4;	K12462	map04722;map04962;	Neurotrophin signaling pathway;Vasopressin-regulated water reabsorption;	IPR000406;IPR014756;IPR024792;	Rho protein GDP-dissociation inhibitor;Immunoglobulin E-set;Rho GDP-dissociation inhibitor domain;	nucleus	SPAC6F12.06	176	T	[T] Signal transduction mechanisms;
T5AA87	PH domain-containing protein OS=Ophiocordyceps sinensis (strain Co18 / CGMCC 3.14243) OX=911162 GN=OCS_05570 PE=4 SV=1	up	1.948	nan	1.919	1.568	0.842	nan	0.719	0.92	0.903	nan	0.754	0.815	2.19063	0.00190003	1.00364	0.969085	2.19862	0.00158945													IPR025187;	Protein of unknown function DUF4112;	mitochondria
T5ADP6	Uncharacterized protein OS=Ophiocordyceps sinensis (strain Co18 / CGMCC 3.14243) OX=911162 GN=OCS_04326 PE=4 SV=1	up	1.967	1.526	2.459	1.012	0.69	0.759	0.615	1.116	0.898	0.88	0.685	1.11	2.18996	0.0279477	0.89001	0.511777	1.94906	0.0383984															extracellular
T5A8N2	DUF895 domain membrane protein OS=Ophiocordyceps sinensis (strain Co18 / CGMCC 3.14243) OX=911162 GN=OCS_05336 PE=4 SV=1	up	2.103	1.687	2.244	1.328	0.757	0.866	0.644	1.117	1.049	0.991	0.844	0.869	2.17552	0.00506713	0.90168	0.442732	1.96163	0.00551691				GO:0005737;GO:0016021;GO:0016020;GO:0044464;GO:0005623;GO:0005622;GO:0005575;GO:0044424;GO:0044425;GO:0031224;	cytoplasm;integral component of membrane;membrane;cell part;cell;intracellular;cellular_component;intracellular part;membrane part;intrinsic component of membrane;	4;4;2;2;2;3;1;3;2;3;	GO:0005215;GO:0022857;GO:0003674;	transporter activity;transmembrane transporter activity;molecular_function;	2;3;1;				IPR020846;IPR011701;	Major facilitator superfamily domain;Major facilitator superfamily;	plasma membrane	SPAC922.05c	429	S	[S] Function unknown;
T5AJ79	Peptidoglycan-binding lysin domain protein OS=Ophiocordyceps sinensis (strain Co18 / CGMCC 3.14243) OX=911162 GN=OCS_02476 PE=4 SV=1	up	2.511	1.117	1.977	1.085	0.863	0.886	0.567	0.771	1.032	0.927	0.646	0.717	2.16718	0.0442674	0.92926	0.629208	2.01385	0.0574064													IPR018392;	LysM domain;	extracellular	317121452	75.9	M	[M] Cell wall/membrane/envelope biogenesis;	COG1388	LysM repeat
T5AFH5	PAB1 binding protein (Pbp1) OS=Ophiocordyceps sinensis (strain Co18 / CGMCC 3.14243) OX=911162 GN=OCS_03784 PE=4 SV=1	up	1.202	1.373	2.582	1.787	0.929	0.975	0.547	0.761	1.075	0.705	0.459	0.678	2.16188	0.0275814	1.10113	0.661764	2.38053	0.0233112													IPR009604;	LsmAD domain;	nucleus	SPBC21B10.03c	107	A	[A] RNA processing and modification;
T5AAR7	Phosphoinositide phosphatase OS=Ophiocordyceps sinensis (strain Co18 / CGMCC 3.14243) OX=911162 GN=OCS_04772 PE=4 SV=1	up	2.157	nan	1.849	1.416	0.774	nan	0.792	0.945	0.762	nan	0.716	0.692	2.15931	0.0118977	1.15714	0.121618	2.49862	0.0073809	GO:0006661;GO:0046856;GO:0046488;GO:0046486;GO:0019637;GO:1901576;GO:0006629;GO:0044710;GO:0044711;GO:0008150;GO:0008152;GO:0090407;GO:0008654;GO:0016311;GO:0044249;GO:0044699;GO:0046839;GO:0006644;GO:0009987;GO:0044255;GO:0030258;GO:0046474;GO:0006650;GO:0045017;GO:0071704;GO:0009058;GO:0044763;GO:0036092;GO:0008610;GO:0044238;GO:0044237;GO:0006796;GO:0006793;	phosphatidylinositol biosynthetic process;phosphatidylinositol dephosphorylation;phosphatidylinositol metabolic process;glycerolipid metabolic process;organophosphate metabolic process;organic substance biosynthetic process;lipid metabolic process;single-organism metabolic process;single-organism biosynthetic process;biological_process;metabolic process;organophosphate biosynthetic process;phosph…	7;7;7;5;4;4;4;3;4;1;2;5;5;6;4;2;6;5;2;4;5;6;6;5;3;3;3;8;5;3;3;5;4;	GO:0005783;GO:0005789;GO:0031985;GO:0031984;GO:0016021;GO:0016020;GO:0005795;GO:0005794;GO:0005797;GO:1902494;GO:0098588;GO:1990234;GO:0002178;GO:0043234;GO:0043231;GO:0042175;GO:0044425;GO:0044422;GO:0031300;GO:0043229;GO:0030176;GO:0030173;GO:0043227;GO:0043226;GO:0044432;GO:0044431;GO:0031224;GO:0012505;GO:0031211;GO:0044446;GO:0044444;GO:0031228;GO:0031301;GO:0035339;GO:0031227;GO:0005737;GO:…	endoplasmic reticulum;endoplasmic reticulum membrane;Golgi cisterna;organelle subcompartment;integral component of membrane;membrane;Golgi stack;Golgi apparatus;Golgi medial cisterna;catalytic complex;bounding membrane of organelle;transferase complex;palmitoyltransferase complex;protein complex;intracellular membrane-bounded organelle;nuclear outer membrane-endoplasmic reticulum membrane network…	4;3;6;4;4;2;5;4;7;4;4;5;6;3;4;3;2;2;3;3;4;5;3;2;4;4;3;3;4;3;4;4;4;6;4;4;3;2;2;3;3;5;5;2;1;3;5;	GO:0043812;GO:0043813;GO:0003674;GO:0016787;GO:0016788;GO:0003824;GO:0052866;GO:0052744;GO:0004438;GO:0016791;GO:0034595;GO:0042578;GO:0034593;GO:0034596;	phosphatidylinositol-4-phosphate phosphatase activity;phosphatidylinositol-3,5-bisphosphate 5-phosphatase activity;molecular_function;hydrolase activity;hydrolase activity, acting on ester bonds;catalytic activity;phosphatidylinositol phosphate phosphatase activity;phosphatidylinositol monophosphate phosphatase activity;phosphatidylinositol-3-phosphatase activity;phosphatase activity;phosphatidyl…	9;9;1;3;4;2;7;8;9;6;8;5;8;8;	K21797			IPR002013;	SAC domain;	plasma membrane	YKL212w	410	I	[I] Lipid transport and metabolism;
T5A6Y1	Bactericidal permeability-increasing protein OS=Ophiocordyceps sinensis (strain Co18 / CGMCC 3.14243) OX=911162 GN=OCS_03055 PE=4 SV=1	up	1.039	1.672	1.765	1.766	0.887	0.642	0.689	0.673	1.141	0.941	0.871	0.767	2.15913	0.00386316	0.77715	0.0754061	1.67796	0.0168015													IPR027842;IPR017943;	Protein of unknown function DUF4449;Bactericidal permeability-increasing protein, alpha/beta domain;	nucleus
T5AKU5	Pleckstrin domain-like protein OS=Ophiocordyceps sinensis (strain Co18 / CGMCC 3.14243) OX=911162 GN=OCS_01842 PE=4 SV=1	up	1.429	1.633	1.346	1.683	0.773	0.656	0.742	0.659	1.081	0.907	0.825	0.913	2.1523	7.7484e-05	0.75953	0.0106676	1.63473	0.00087937													IPR001849;IPR011993;	Pleckstrin homology domain;PH domain-like;	nucleus
T5AFT7	Arb2 domain-containing protein OS=Ophiocordyceps sinensis (strain Co18 / CGMCC 3.14243) OX=911162 GN=OCS_02834 PE=4 SV=1	up	2.234	nan	1.607	1.195	0.695	nan	0.837	0.829	0.766	nan	0.608	0.8	2.13301	0.043323	1.08602	0.452473	2.31647	0.036243															cytosol, mitochondria
T5A9X0	G protein beta subunit OS=Ophiocordyceps sinensis (strain Co18 / CGMCC 3.14243) OX=911162 GN=OCS_04898 PE=4 SV=1	up	1.69	1.554	2.083	1.585	0.805	0.901	0.788	0.754	0.933	0.875	0.598	0.791	2.12807	0.000342653	1.01595	0.878057	2.16203	0.000613461							GO:0003674;GO:0004871;	molecular_function;signal transducer activity;	1;2;	K04536	map04011;map04014;map04062;map04151;map04713;map04723;map04724;map04725;map04726;map04727;map04728;map04740;map04744;map05032;map05034;map05200;	MAPK signaling pathway - yeast;Ras signaling pathway;Chemokine signaling pathway;PI3K-Akt signaling pathway;Circadian entrainment;Retrograde endocannabinoid signaling;Glutamatergic synapse;Cholinergic synapse;Serotonergic synapse;GABAergic synapse;Dopaminergic synapse;Olfactory transduction;Phototransduction;Morphine addiction;Alcoholism;Pathways in cancer;	IPR016346;IPR020472;IPR017986;IPR001680;IPR015943;IPR019775;IPR001632;	Guanine nucleotide-binding protein, beta subunit;G-protein beta WD-40 repeat;WD40-repeat-containing domain;WD40 repeat;WD40/YVTN repeat-like-containing domain;WD40 repeat, conserved site;G-protein, beta subunit;	nucleus	CE02186	494	R	[R] General function prediction only;
T5A830	Uncharacterized protein OS=Ophiocordyceps sinensis (strain Co18 / CGMCC 3.14243) OX=911162 GN=OCS_05559 PE=4 SV=1	up	1.916	1.924	nan	1.772	0.963	0.917	nan	0.761	0.859	0.641	nan	0.573	2.12495	0.000228225	1.274	0.147811	2.70719	0.000288659															extracellular
T5A8G8	Secretory lipase family protein OS=Ophiocordyceps sinensis (strain Co18 / CGMCC 3.14243) OX=911162 GN=OCS_06237 PE=4 SV=1	up	1.851	1.112	1.214	1.212	0.581	0.689	0.637	0.632	1.21	1.229	1.156	1.152	2.12251	0.0059046	0.53486	1.45362e-06	1.13524	0.383368	GO:0044712;GO:0044710;GO:0006629;GO:0044238;GO:0009056;GO:1901575;GO:0016042;GO:0008152;GO:0008150;GO:0071704;GO:0044699;	single-organism catabolic process;single-organism metabolic process;lipid metabolic process;primary metabolic process;catabolic process;organic substance catabolic process;lipid catabolic process;metabolic process;biological_process;organic substance metabolic process;single-organism process;	4;3;4;3;3;4;5;2;1;3;2;	GO:0005575;GO:0005576;	cellular_component;extracellular region;	1;2;	GO:0016787;GO:0004806;GO:0016788;GO:0003824;GO:0003674;GO:0052689;GO:0016298;	hydrolase activity;triglyceride lipase activity;hydrolase activity, acting on ester bonds;catalytic activity;molecular_function;carboxylic ester hydrolase activity;lipase activity;	3;6;4;2;1;5;5;				IPR029058;IPR005152;	Alpha/Beta hydrolase fold;Lipase, secreted;	extracellular	407647142	234	T	[T] Signal transduction mechanisms;	COG1073	Fermentation-respiration switch protein FrsA, has esterase activity, DUF1100 family
T5AE78	ATP synthase subunit d, mitochondrial OS=Ophiocordyceps sinensis (strain Co18 / CGMCC 3.14243) OX=911162 GN=OCS_03393 PE=3 SV=1	up	2.16	1.483	1.875	1.282	0.75	0.851	0.74	0.873	0.852	0.841	0.776	0.765	2.11573	0.00414004	0.99382	0.906238	2.10266	0.00408223	GO:0009167;GO:0009165;GO:0044281;GO:0009161;GO:1901362;GO:0042451;GO:1901360;GO:0044711;GO:0009199;GO:0009206;GO:0009205;GO:0009201;GO:0046034;GO:0046129;GO:0046128;GO:0042455;GO:0046483;GO:1901564;GO:1901566;GO:0006163;GO:0006164;GO:0019637;GO:0019438;GO:0009163;GO:0009141;GO:0009142;GO:0009144;GO:0009145;GO:0006807;GO:1901576;GO:0015992;GO:0009259;GO:0098662;GO:0098660;GO:0018130;GO:0006818;GO:…	purine ribonucleoside monophosphate metabolic process;nucleotide biosynthetic process;small molecule metabolic process;ribonucleoside monophosphate metabolic process;organic cyclic compound biosynthetic process;purine nucleoside biosynthetic process;organic cyclic compound metabolic process;single-organism biosynthetic process;ribonucleoside triphosphate metabolic process;purine ribonucleoside tr…	8;6;4;7;5;7;4;4;7;8;8;7;8;8;7;7;4;4;5;6;7;4;5;6;6;6;7;7;3;4;6;6;7;6;5;5;7;5;4;3;8;1;2;5;7;5;5;7;6;3;5;3;6;5;9;7;4;4;6;7;7;6;4;3;6;2;7;8;4;9;5;4;4;2;5;4;5;5;6;4;5;3;2;8;5;4;6;5;6;3;3;3;4;6;	GO:0031975;GO:0045263;GO:0016020;GO:0031967;GO:0031966;GO:0043234;GO:0043231;GO:0045259;GO:0044429;GO:0044422;GO:0043229;GO:0043227;GO:0043226;GO:0044464;GO:0044424;GO:0044425;GO:0033177;GO:0005737;GO:0031090;GO:0005739;GO:0044455;GO:0019866;GO:0005623;GO:0005622;GO:0005743;GO:0005740;GO:0044446;GO:0044444;GO:0098800;GO:0005753;GO:0000276;GO:0016469;GO:0032991;GO:0005575;GO:0098796;GO:0098798;	envelope;proton-transporting ATP synthase complex, coupling factor F(o);membrane;organelle envelope;mitochondrial membrane;protein complex;intracellular membrane-bounded organelle;proton-transporting ATP synthase complex;mitochondrial part;organelle part;intracellular organelle;membrane-bounded organelle;organelle;cell part;intracellular part;membrane part;proton-transporting two-sector ATPase co…	3;4;2;4;4;3;4;4;4;2;3;3;2;2;3;2;4;4;3;5;3;4;2;3;5;5;3;4;4;5;5;4;2;1;3;4;	GO:0003674;GO:0022891;GO:0022890;GO:0022892;GO:0015075;GO:0015077;GO:0015078;GO:0005215;GO:0008324;GO:0022857;	molecular_function;substrate-specific transmembrane transporter activity;inorganic cation transmembrane transporter activity;substrate-specific transporter activity;ion transmembrane transporter activity;monovalent inorganic cation transmembrane transporter activity;hydrogen ion transmembrane transporter activity;transporter activity;cation transmembrane transporter activity;transmembrane transpo…	1;4;7;3;5;8;9;2;6;3;	K02138	map00190;map01100;map05010;map05012;map05016;	Oxidative phosphorylation;Metabolic pathways;Alzheimer's disease;Parkinson's disease;Huntington's disease;	IPR008689;	ATP synthase, F0 complex, subunit D, mitochondrial;	mitochondria	YKL016c	186	C	[C] Energy production and conversion;
T5AB02	Metallopeptidase MepB OS=Ophiocordyceps sinensis (strain Co18 / CGMCC 3.14243) OX=911162 GN=OCS_05358 PE=3 SV=1	up	1.899	1.471	1.83	1.509	0.925	0.798	0.67	0.778	0.9	0.915	0.699	0.849	2.11573	0.000336881	0.94291	0.529066	1.99494	0.000431401	GO:0043170;GO:0071704;GO:0006508;GO:0008150;GO:0008152;GO:0044238;GO:0019538;	macromolecule metabolic process;organic substance metabolic process;proteolysis;biological_process;metabolic process;primary metabolic process;protein metabolic process;	4;3;5;1;2;3;4;	GO:0000324;GO:0000323;GO:0000322;GO:0031970;GO:0031974;GO:0031975;GO:0043229;GO:0043227;GO:0043226;GO:0005737;GO:0044446;GO:0005773;GO:0005740;GO:0005739;GO:0005794;GO:0031967;GO:0012505;GO:0005758;GO:0043231;GO:0044464;GO:0005623;GO:0005622;GO:0005575;GO:0044444;GO:0044429;GO:0044424;GO:0044422;	fungal-type vacuole;lytic vacuole;storage vacuole;organelle envelope lumen;membrane-enclosed lumen;envelope;intracellular organelle;membrane-bounded organelle;organelle;cytoplasm;intracellular organelle part;vacuole;mitochondrial envelope;mitochondrion;Golgi apparatus;organelle envelope;endomembrane system;mitochondrial intermembrane space;intracellular membrane-bounded organelle;cell part;cell;i…	7;6;6;3;2;3;3;3;2;4;3;5;5;5;4;4;3;4;4;2;2;3;1;4;4;3;2;	GO:0016787;GO:0004175;GO:0003674;GO:0005488;GO:0008233;GO:0008237;GO:0043167;GO:0046872;GO:0004222;GO:0043169;GO:0003824;GO:0070011;	hydrolase activity;endopeptidase activity;molecular_function;binding;peptidase activity;metallopeptidase activity;ion binding;metal ion binding;metalloendopeptidase activity;cation binding;catalytic activity;peptidase activity, acting on L-amino acid peptides;	3;6;1;2;4;6;3;5;7;4;2;5;	K13726			IPR024080;IPR001567;	Neurolysin/Thimet oligopeptidase, N-terminal;Peptidase M3A/M3B catalytic domain;	cytosol, nucleus	YCL057w	481	O	[O] Posttranslational modification, protein turnover, chaperones;
T5A9T9	AhpC/TSA family protein OS=Ophiocordyceps sinensis (strain Co18 / CGMCC 3.14243) OX=911162 GN=OCS_05766 PE=4 SV=1	up	1.649	nan	2.886	1.961	1.163	nan	0.816	1.101	0.703	nan	0.333	0.688	2.10908	0.0421265	1.78654	0.0487466	3.76798	0.0151939	GO:0090087;GO:0033157;GO:0051169;GO:0008104;GO:0019220;GO:0080090;GO:0019222;GO:0060249;GO:0051049;GO:0032386;GO:0048583;GO:0007165;GO:0044707;GO:0023014;GO:0044712;GO:0051716;GO:0001895;GO:0070727;GO:0009966;GO:0002262;GO:0000165;GO:0098869;GO:0001909;GO:0001906;GO:0033036;GO:0043122;GO:0042325;GO:0006793;GO:0060255;GO:0006606;GO:0006605;GO:0045184;GO:1990748;GO:0010035;GO:0042990;GO:0042991;GO:…	regulation of peptide transport;regulation of intracellular protein transport;nuclear transport;protein localization;regulation of phosphate metabolic process;regulation of primary metabolic process;regulation of metabolic process;anatomical structure homeostasis;regulation of transport;regulation of intracellular transport;regulation of response to stimulus;signal transduction;single-multicellul…	5;6;6;4;6;4;3;5;4;5;3;4;3;4;4;3;6;4;4;3;5;4;3;2;3;6;7;4;4;5;6;4;3;4;7;6;5;3;5;4;4;2;4;4;6;4;5;6;5;4;5;5;2;5;5;5;4;6;7;6;2;3;5;6;4;3;3;4;3;5;1;2;3;6;3;6;5;2;3;5;5;7;8;6;5;6;2;7;3;4;2;4;5;5;5;5;5;4;6;4;6;5;5;5;4;6;6;5;5;3;4;6;3;5;6;6;4;7;4;4;4;4;2;3;4;4;2;5;3;5;4;7;2;4;5;6;7;6;5;5;4;6;3;4;4;5;3;2;3;3;4;3;7;6;6;3;5;3;5;5;4;	GO:0031982;GO:0005615;GO:0043230;GO:0043231;GO:0044421;GO:0044464;GO:0043229;GO:0043227;GO:0043226;GO:0044424;GO:0043209;GO:0044444;GO:0005737;GO:0005634;GO:0005739;GO:0005623;GO:0005622;GO:0070062;GO:1903561;GO:0005575;GO:0005576;	vesicle;extracellular space;extracellular organelle;intracellular membrane-bounded organelle;extracellular region part;cell part;intracellular organelle;membrane-bounded organelle;organelle;intracellular part;myelin sheath;cytoplasmic part;cytoplasm;nucleus;mitochondrion;cell;intracellular;extracellular exosome;extracellular vesicle;cellular_component;extracellular region;	4;3;3;4;2;2;3;3;2;3;3;4;4;5;5;2;3;4;3;1;2;	GO:0016209;GO:0016684;GO:0008379;GO:0003676;GO:1901363;GO:0003824;GO:0097159;GO:0004601;GO:0044822;GO:0003723;GO:0003674;GO:0005488;GO:0051920;GO:0016491;	antioxidant activity;oxidoreductase activity, acting on peroxide as acceptor;thioredoxin peroxidase activity;nucleic acid binding;heterocyclic compound binding;catalytic activity;organic cyclic compound binding;peroxidase activity;poly(A) RNA binding;RNA binding;molecular_function;binding;peroxiredoxin activity;oxidoreductase activity;	2;4;4;4;3;2;3;3;6;5;1;2;3;3;	K03386	map04214;	Apoptosis - fly;	IPR000866;IPR019479;IPR013766;IPR012336;	Alkyl hydroperoxide reductase subunit C/ Thiol specific antioxidant;Peroxiredoxin, C-terminal;Thioredoxin domain;Thioredoxin-like fold;	cytosol	Hs4505591	266	O	[O] Posttranslational modification, protein turnover, chaperones;
T5A9D3	Uncharacterized protein OS=Ophiocordyceps sinensis (strain Co18 / CGMCC 3.14243) OX=911162 GN=OCS_05865 PE=4 SV=1	up	1.843	1.534	1.713	1.411	0.785	0.826	0.702	0.784	0.818	0.812	0.597	0.795	2.09912	0.00013577	1.02482	0.761731	2.15122	0.000208633															nucleus
T5A6R5	RNA-binding La domain protein OS=Ophiocordyceps sinensis (strain Co18 / CGMCC 3.14243) OX=911162 GN=OCS_06780 PE=4 SV=1	up	2.43	1.991	0.972	1.407	0.724	0.615	1.126	0.775	0.715	0.572	0.912	0.739	2.09877	0.0393459	1.10279	0.584349	2.3145	0.0258542										K11090	map05322;	Systemic lupus erythematosus;	IPR011991;IPR000504;IPR002344;IPR006630;	Winged helix-turn-helix DNA-binding domain;RNA recognition motif domain;Lupus La protein;La-type HTH domain;	nucleus	SPAC57A10.10c	144	R	[R] General function prediction only;
T5AKM2	Leukotriene A-4 hydrolase OS=Ophiocordyceps sinensis (strain Co18 / CGMCC 3.14243) OX=911162 GN=OCS_01906 PE=4 SV=1	up	2.07	1.268	nan	1.708	0.811	0.847	nan	0.756	0.817	0.893	nan	0.691	2.0903	0.0197897	1.00541	0.949718	2.10162	0.0211079	GO:0006633;GO:0006631;GO:0006636;GO:0044237;GO:0019752;GO:0044248;GO:0006807;GO:0044281;GO:0044283;GO:0072330;GO:0044699;GO:1901576;GO:0044710;GO:0044711;GO:0043171;GO:1901570;GO:0006690;GO:0006691;GO:0071704;GO:0034641;GO:1901575;GO:0019370;GO:0006629;GO:0009987;GO:0046394;GO:0032787;GO:0009058;GO:0008150;GO:0008152;GO:0043436;GO:0044255;GO:0009056;GO:0008610;GO:0044238;GO:1901564;GO:0006082;GO:…	fatty acid biosynthetic process;fatty acid metabolic process;unsaturated fatty acid biosynthetic process;cellular metabolic process;carboxylic acid metabolic process;cellular catabolic process;nitrogen compound metabolic process;small molecule metabolic process;small molecule biosynthetic process;monocarboxylic acid biosynthetic process;single-organism process;organic substance biosynthetic proce…	6;5;7;3;6;4;3;4;5;7;2;4;3;4;5;5;5;6;3;4;4;7;4;2;6;7;3;1;2;5;4;3;5;3;4;4;4;4;5;6;5;3;5;6;5;	GO:0043229;GO:0043227;GO:0005737;GO:0005634;GO:0043226;GO:0043231;GO:0044464;GO:0005623;GO:0005622;GO:0005575;GO:0044424;	intracellular organelle;membrane-bounded organelle;cytoplasm;nucleus;organelle;intracellular membrane-bounded organelle;cell part;cell;intracellular;cellular_component;intracellular part;	3;3;4;5;2;4;2;2;3;1;3;	GO:0004177;GO:0008238;GO:0003674;GO:0008233;GO:0043167;GO:0046914;GO:0016801;GO:0004301;GO:0008237;GO:0046872;GO:0016787;GO:0043169;GO:0003824;GO:0005488;GO:0004463;GO:0008270;GO:0070011;GO:0016803;	aminopeptidase activity;exopeptidase activity;molecular_function;peptidase activity;ion binding;transition metal ion binding;hydrolase activity, acting on ether bonds;epoxide hydrolase activity;metallopeptidase activity;metal ion binding;hydrolase activity;cation binding;catalytic activity;binding;leukotriene-A4 hydrolase activity;zinc ion binding;peptidase activity, acting on L-amino acid peptid…	7;6;1;4;3;6;4;6;6;5;3;4;2;2;6;7;5;5;	K01254	map00590;map01100;	Arachidonic acid metabolism;Metabolic pathways;	IPR015211;IPR001930;IPR014782;IPR016024;IPR034015;	Peptidase M1, leukotriene A4 hydrolase/aminopeptidase C-terminal;Peptidase M1, alanine aminopeptidase/leukotriene A4 hydrolase;Peptidase M1, membrane alanine aminopeptidase, N-terminal;Armadillo-type fold;Leukotriene A4 hydrolase-like;	mitochondria	YNL045w	516	IOVE	[I] Lipid transport and metabolism;[O] Posttranslational modification, protein turnover, chaperones;[V] Defense mechanisms;[E] Amino acid transport and metabolism;
T5A7E3	Vacuolar transporter chaperone 1 OS=Ophiocordyceps sinensis (strain Co18 / CGMCC 3.14243) OX=911162 GN=OCS_05769 PE=4 SV=1	up	1.612	nan	1.837	nan	0.919	nan	0.733	nan	1.022	nan	0.873	nan	2.08777	0.0253899	0.87177	0.415167	1.82005	0.0288577	GO:0044802;GO:0044237;GO:0044801;GO:0016237;GO:0061025;GO:0061024;GO:0010324;GO:0071840;GO:0044699;GO:0044710;GO:1902589;GO:0016043;GO:0071704;GO:0042144;GO:0051641;GO:1902534;GO:0044712;GO:0009987;GO:0006082;GO:0006914;GO:0006810;GO:0044765;GO:0008150;GO:0008152;GO:0051649;GO:0043436;GO:0051234;GO:0009056;GO:0051179;GO:1902578;GO:0006996;GO:0007033;GO:0007034;GO:0046907;GO:0097576;GO:0044763;GO:…	single-organism membrane organization;cellular metabolic process;single-organism membrane fusion;lysosomal microautophagy;membrane fusion;membrane organization;membrane invagination;cellular component organization or biogenesis;single-organism process;single-organism metabolic process;single-organism organelle organization;cellular component organization;organic substance metabolic process;vacuol…	4;3;5;4;5;4;5;2;2;3;4;3;3;5;3;5;4;2;4;3;4;4;1;2;4;5;3;3;2;3;4;5;6;5;6;3;5;5;4;5;4;	GO:0005783;GO:0043229;GO:0031300;GO:0043227;GO:0043226;GO:0005737;GO:0044446;GO:0031090;GO:0005773;GO:0016021;GO:0016020;GO:0005774;GO:0044437;GO:0031224;GO:0044425;GO:0033254;GO:0098588;GO:0031310;GO:0012505;GO:0043234;GO:0043231;GO:0032991;GO:0044464;GO:0005623;GO:0005622;GO:0005575;GO:0044444;GO:0044424;GO:0098805;GO:0044422;	endoplasmic reticulum;intracellular organelle;intrinsic component of organelle membrane;membrane-bounded organelle;organelle;cytoplasm;intracellular organelle part;organelle membrane;vacuole;integral component of membrane;membrane;vacuolar membrane;vacuolar part;intrinsic component of membrane;membrane part;vacuolar transporter chaperone complex;bounding membrane of organelle;intrinsic component …	4;3;3;3;2;4;3;3;5;4;2;4;4;3;2;4;4;4;3;3;4;2;2;2;3;1;4;3;3;2;	GO:0005488;GO:0003674;GO:1901363;GO:0003676;GO:0003729;GO:0044822;GO:0003723;GO:0097159;	binding;molecular_function;heterocyclic compound binding;nucleic acid binding;mRNA binding;poly(A) RNA binding;RNA binding;organic cyclic compound binding;	2;1;3;4;7;6;5;3;				IPR003807;	Domain of unknown function DUF202;	plasma membrane	SPBC21B10.04c	175	UO	[U] Intracellular trafficking, secretion, and vesicular transport;[O] Posttranslational modification, protein turnover, chaperones;
T5AD79	Uncharacterized protein OS=Ophiocordyceps sinensis (strain Co18 / CGMCC 3.14243) OX=911162 GN=OCS_04610 PE=4 SV=1	up	2.422	1.488	nan	1.708	0.722	1.057	nan	0.916	0.801	0.783	nan	0.859	2.08459	0.0308556	1.10315	0.447256	2.29963	0.0200904															extracellular
T5A9V4	Uncharacterized protein OS=Ophiocordyceps sinensis (strain Co18 / CGMCC 3.14243) OX=911162 GN=OCS_05105 PE=4 SV=1	up	2.053	1.619	1.534	1.126	0.685	0.714	0.831	0.813	0.762	0.816	0.81	0.919	2.08086	0.00537634	0.92017	0.225759	1.91473	0.00779896															mitochondria
T5AIH0	Nuclear movement protein OS=Ophiocordyceps sinensis (strain Co18 / CGMCC 3.14243) OX=911162 GN=OCS_01897 PE=4 SV=1	up	1.687	1.673	1.789	1.372	0.825	0.79	0.742	0.792	0.788	0.718	0.574	0.654	2.07082	9.21874e-05	1.15179	0.0772215	2.38515	8.2687e-05	GO:0000086;GO:0051656;GO:0071840;GO:0045786;GO:0040023;GO:0048519;GO:0010972;GO:0010970;GO:0051179;GO:0071852;GO:0031505;GO:1901991;GO:0006928;GO:0007067;GO:0050789;GO:0007346;GO:0016043;GO:0065007;GO:0007049;GO:0030473;GO:0006810;GO:0050794;GO:1901987;GO:0008150;GO:0051234;GO:1901988;GO:0046907;GO:0072384;GO:0000280;GO:0045229;GO:1901990;GO:0044699;GO:0010564;GO:0030705;GO:0051640;GO:0009987;GO:…	G2/M transition of mitotic cell cycle;establishment of organelle localization;cellular component organization or biogenesis;negative regulation of cell cycle;establishment of nucleus localization;negative regulation of biological process;negative regulation of G2/M transition of mitotic cell cycle;establishment of localization by movement along microtubule;localization;fungal-type cell wall organ…	6;4;2;4;5;2;7;4;2;4;5;6;4;5;2;5;3;2;4;6;4;3;6;1;3;6;5;5;6;4;6;2;5;6;4;2;5;6;5;5;6;4;4;4;6;3;4;7;7;5;5;4;3;4;5;7;3;3;4;5;4;4;5;4;5;5;5;6;3;	GO:0099512;GO:0099513;GO:0043232;GO:0044424;GO:0044422;GO:0043229;GO:0043228;GO:0005856;GO:0044430;GO:0044446;GO:0005874;GO:0005737;GO:0044464;GO:0005623;GO:0005622;GO:0043226;GO:0015630;GO:0005575;	supramolecular fiber;polymeric cytoskeletal fiber;intracellular non-membrane-bounded organelle;intracellular part;organelle part;intracellular organelle;non-membrane-bounded organelle;cytoskeleton;cytoskeletal part;intracellular organelle part;microtubule;cytoplasm;cell part;cell;intracellular;organelle;microtubule cytoskeleton;cellular_component;	2;3;4;3;2;3;3;5;4;3;4;4;2;2;3;2;6;1;							IPR007052;IPR008978;	CS domain;HSP20-like chaperone;	nucleus	Hs5729953	201	T	[T] Signal transduction mechanisms;
T5AL37	Adenylosuccinate lyase OS=Ophiocordyceps sinensis (strain Co18 / CGMCC 3.14243) OX=911162 GN=OCS_00966 PE=3 SV=1	up	1.698	1.549	1.898	1.34	0.695	0.863	0.712	0.865	1.012	0.807	0.689	0.781	2.06859	0.000577532	0.95318	0.65706	1.97172	0.0010838	GO:0009165;GO:0042278;GO:0006189;GO:0044237;GO:0044249;GO:0034641;GO:0006807;GO:0044281;GO:0009161;GO:0072521;GO:0072522;GO:0009126;GO:0009127;GO:0044699;GO:0006139;GO:0044710;GO:0044711;GO:0044208;GO:1901362;GO:0009259;GO:0008150;GO:0071704;GO:0009119;GO:1901657;GO:0009124;GO:0006167;GO:1901659;GO:0018130;GO:0006793;GO:0009167;GO:0042455;GO:1901576;GO:0009156;GO:0009168;GO:0009987;GO:0006725;GO:…	nucleotide biosynthetic process;purine nucleoside metabolic process;'de novo' IMP biosynthetic process;cellular metabolic process;cellular biosynthetic process;cellular nitrogen compound metabolic process;nitrogen compound metabolic process;small molecule metabolic process;ribonucleoside monophosphate metabolic process;purine-containing compound metabolic process;purine-containing compound biosyn…	6;6;10;3;4;4;3;4;7;5;6;7;7;2;4;3;4;10;5;6;1;3;6;4;6;9;5;5;4;8;7;4;7;8;2;4;8;8;7;3;6;9;2;5;5;5;8;7;5;4;4;3;5;4;5;7;5;4;6;5;6;6;3;5;6;7;5;7;4;8;4;5;				GO:0004018;GO:0003674;GO:0016840;GO:0016842;GO:0016829;GO:0070626;GO:0003824;	N6-(1,2-dicarboxyethyl)AMP AMP-lyase (fumarate-forming) activity;molecular_function;carbon-nitrogen lyase activity;amidine-lyase activity;lyase activity;(S)-2-(5-amino-1-(5-phospho-D-ribosyl)imidazole-4-carboxamido)succinate AMP-lyase (fumarate-forming) activity;catalytic activity;	6;1;4;5;3;6;2;	K01756	map00230;map00250;map01100;map01110;map01130;	Purine metabolism;"Alanine, aspartate and glutamate metabolism";Metabolic pathways;Biosynthesis of secondary metabolites;Biosynthesis of antibiotics;	IPR020557;IPR024083;IPR019468;IPR022761;IPR008948;IPR000362;IPR004769;	Fumarate lyase, conserved site;Fumarase/histidase, N-terminal;Adenylosuccinate lyase C-terminal;Fumarate lyase, N-terminal;L-Aspartase-like;Fumarate lyase family;Adenylosuccinate lyase;	nucleus	YLR359w	510	F	[F] Nucleotide transport and metabolism;
T5A220	Cornichon OS=Ophiocordyceps sinensis (strain Co18 / CGMCC 3.14243) OX=911162 GN=OCS_04812 PE=4 SV=1	up	2.006	1.792	1.446	1.317	0.83	0.73	0.877	0.735	1.11	0.866	0.999	1.012	2.06842	0.00195502	0.79559	0.0165344	1.6456	0.00812112													IPR007325;	Kynurenine formamidase;	cytosol	404215446	160	E	[E] Amino acid transport and metabolism;	COG1878	Kynurenine formamidase
T5AJ36	Glycoside hydrolase family 38 protein OS=Ophiocordyceps sinensis (strain Co18 / CGMCC 3.14243) OX=911162 GN=OCS_01874 PE=4 SV=1	up	0.989	1.326	1.348	1.526	0.565	0.618	0.771	0.558	1.51	1.346	1.08	1.334	2.06569	0.00156977	0.47666	0.000501793	0.98463	0.892004	GO:0009311;GO:0009313;GO:0044699;GO:0044712;GO:0044710;GO:0006013;GO:0071704;GO:0019318;GO:1901575;GO:0008150;GO:0008152;GO:0044723;GO:0009056;GO:0044724;GO:0044238;GO:0005975;GO:0005996;GO:0016052;GO:0044281;	oligosaccharide metabolic process;oligosaccharide catabolic process;single-organism process;single-organism catabolic process;single-organism metabolic process;mannose metabolic process;organic substance metabolic process;hexose metabolic process;organic substance catabolic process;biological_process;metabolic process;single-organism carbohydrate metabolic process;catabolic process;single-organis…	5;6;2;4;3;7;3;6;4;1;2;4;3;5;3;4;5;5;4;	GO:0000324;GO:0000323;GO:0000322;GO:0044464;GO:0043229;GO:0043227;GO:0043226;GO:0044446;GO:0031090;GO:0005773;GO:0098805;GO:0016020;GO:0005774;GO:0044437;GO:0005737;GO:0098588;GO:0000329;GO:0043231;GO:0005829;GO:0005623;GO:0005622;GO:0005575;GO:0044444;GO:0098852;GO:0044424;GO:0044422;	fungal-type vacuole;lytic vacuole;storage vacuole;cell part;intracellular organelle;membrane-bounded organelle;organelle;intracellular organelle part;organelle membrane;vacuole;whole membrane;membrane;vacuolar membrane;vacuolar part;cytoplasm;bounding membrane of organelle;fungal-type vacuole membrane;intracellular membrane-bounded organelle;cytosol;cell;intracellular;cellular_component;cytoplasm…	7;6;6;2;3;3;2;3;3;5;3;2;4;4;4;4;6;4;5;2;3;1;4;5;3;2;	GO:0016787;GO:0030246;GO:0003674;GO:0005488;GO:0043167;GO:0046914;GO:0008270;GO:0046872;GO:0015923;GO:0043169;GO:0016798;GO:0003824;GO:0004553;GO:0004559;	hydrolase activity;carbohydrate binding;molecular_function;binding;ion binding;transition metal ion binding;zinc ion binding;metal ion binding;mannosidase activity;cation binding;hydrolase activity, acting on glycosyl bonds;catalytic activity;hydrolase activity, hydrolyzing O-glycosyl compounds;alpha-mannosidase activity;	3;3;1;2;3;6;7;5;6;4;4;2;5;7;	K01191	map00511;	Other glycan degradation;	IPR011682;IPR011330;IPR000602;IPR028995;IPR011013;IPR027291;IPR015341;	Glycosyl hydrolase family 38, C-terminal;Glycoside hydrolase/deacetylase, beta/alpha-barrel;Glycoside hydrolase family 38, N-terminal domain;Glycoside hydrolase families 57/38, central domain;Galactose mutarotase-like domain;Glycoside hydrolase 38/57, N-terminal domain;Glycoside hydrolase family 38, central domain;	peroxisome	SPAC513.05	1013	G	[G] Carbohydrate transport and metabolism;
T5A7B9	Ribosomal protein L26/L24P, eukaryotic/archaeal OS=Ophiocordyceps sinensis (strain Co18 / CGMCC 3.14243) OX=911162 GN=OCS_02898 PE=3 SV=1	up	1.888	2.01	1.457	1.154	0.832	0.658	0.846	0.815	0.763	0.775	0.954	0.848	2.06569	0.00599173	0.94341	0.474493	1.9488	0.00781628	GO:0050896;GO:0006807;GO:0044249;GO:0044237;GO:0034645;GO:0043043;GO:0071704;GO:0010467;GO:0043604;GO:0044260;GO:1901566;GO:1901564;GO:0043170;GO:0044238;GO:0009987;GO:0009058;GO:0006950;GO:0009059;GO:0008150;GO:0008152;GO:0009266;GO:0009409;GO:0044271;GO:0044267;GO:0009628;GO:0019538;GO:0034641;GO:0043603;GO:1901576;GO:0006518;GO:0006412;	response to stimulus;nitrogen compound metabolic process;cellular biosynthetic process;cellular metabolic process;cellular macromolecule biosynthetic process;peptide biosynthetic process;organic substance metabolic process;gene expression;amide biosynthetic process;cellular macromolecule metabolic process;organonitrogen compound biosynthetic process;organonitrogen compound metabolic process;macro…	2;3;4;3;5;6;3;5;6;4;5;4;4;3;2;3;3;5;1;2;4;4;5;5;3;4;4;5;4;5;6;	GO:0022626;GO:0022625;GO:1990904;GO:0005886;GO:0031974;GO:0043229;GO:0043228;GO:0015934;GO:0005774;GO:0043227;GO:0043226;GO:0005737;GO:0005575;GO:0009536;GO:0031090;GO:0031981;GO:0005730;GO:0005773;GO:0005634;GO:0016020;GO:0030529;GO:0044437;GO:0009507;GO:0098588;GO:0071944;GO:0044391;GO:0043231;GO:0032991;GO:0005840;GO:0043232;GO:0043233;GO:0005829;GO:0044464;GO:0005623;GO:0005622;GO:0044446;GO:…	cytosolic ribosome;cytosolic large ribosomal subunit;ribonucleoprotein complex;plasma membrane;membrane-enclosed lumen;intracellular organelle;non-membrane-bounded organelle;large ribosomal subunit;vacuolar membrane;membrane-bounded organelle;organelle;cytoplasm;cellular_component;plastid;organelle membrane;nuclear lumen;nucleolus;vacuole;nucleus;membrane;intracellular ribonucleoprotein complex;v…	6;6;3;3;2;3;3;5;4;3;2;4;1;5;3;5;5;5;5;2;4;4;6;4;3;4;4;2;5;4;3;5;2;2;3;3;4;4;5;4;3;3;2;	GO:0003674;GO:0003735;GO:0005198;	molecular_function;structural constituent of ribosome;structural molecule activity;	1;3;2;	K02898	map03010;	Ribosome;	IPR014722;IPR005756;IPR008991;IPR005825;IPR005824;	Ribosomal protein L2 domain 2;Ribosomal protein L26/L24, eukaryotic/archaeal;Translation protein SH3-like domain;Ribosomal protein L24/L26, conserved site;KOW;	mitochondria	At3g49910	164	J	[J] Translation, ribosomal structure and biogenesis;
T5ADS6	ATPases Rpt2 of the 19S regulatory particle of the 26S proteasome OS=Ophiocordyceps sinensis (strain Co18 / CGMCC 3.14243) OX=911162 GN=OCS_04292 PE=3 SV=1	up	2.435	1.551	1.602	1.356	0.802	0.872	0.887	0.806	0.712	0.816	0.831	0.919	2.06237	0.00977614	1.02715	0.658024	2.11836	0.00921901	GO:0032436;GO:0080090;GO:0019222;GO:0010965;GO:0071840;GO:0032434;GO:0051246;GO:0048518;GO:0007088;GO:0060255;GO:0030162;GO:0030163;GO:1902099;GO:1903364;GO:0019538;GO:0010638;GO:0051783;GO:0051781;GO:0051785;GO:0044784;GO:0009896;GO:0045840;GO:0009894;GO:0045842;GO:0009893;GO:0007067;GO:0030071;GO:0044267;GO:0007346;GO:0044265;GO:0044260;GO:0016043;GO:0065007;GO:0044699;GO:1901800;GO:0051130;GO:…	positive regulation of proteasomal ubiquitin-dependent protein catabolic process;regulation of primary metabolic process;regulation of metabolic process;regulation of mitotic sister chromatid separation;cellular component organization or biogenesis;regulation of proteasomal ubiquitin-dependent protein catabolic process;regulation of protein metabolic process;positive regulation of biological proc…	8;4;3;7;2;8;5;2;6;4;6;5;6;6;4;5;5;4;5;6;4;6;4;6;3;5;7;5;5;5;4;3;2;2;7;4;3;6;1;2;4;6;6;6;5;8;5;6;6;5;6;5;5;4;4;5;6;6;4;7;6;5;5;5;7;5;7;2;7;6;4;4;5;5;5;4;6;5;4;4;4;5;5;6;4;6;6;5;4;4;2;3;5;5;6;5;7;4;3;3;5;4;3;6;5;4;4;3;4;5;7;6;3;	GO:0031974;GO:0005838;GO:0031981;GO:0000790;GO:0000502;GO:0043234;GO:0043231;GO:0043232;GO:0043233;GO:0005829;GO:0044428;GO:0044424;GO:0044427;GO:0044422;GO:0000228;GO:0043229;GO:0043228;GO:0000785;GO:0005622;GO:0043227;GO:0044446;GO:0044444;GO:0008540;GO:0005737;GO:0005634;GO:0044454;GO:0043226;GO:0044464;GO:0005623;GO:0022624;GO:0005694;GO:0032991;GO:0005575;GO:0070013;	membrane-enclosed lumen;proteasome regulatory particle;nuclear lumen;nuclear chromatin;proteasome complex;protein complex;intracellular membrane-bounded organelle;intracellular non-membrane-bounded organelle;organelle lumen;cytosol;nuclear part;intracellular part;chromosomal part;organelle part;nuclear chromosome;intracellular organelle;non-membrane-bounded organelle;chromatin;intracellular;membr…	2;4;5;4;4;3;4;4;3;5;4;3;4;2;5;3;3;3;3;3;3;4;4;4;5;5;2;2;2;4;5;2;1;4;	GO:1901363;GO:0000166;GO:0032549;GO:0016818;GO:0016817;GO:0097367;GO:0005488;GO:0016887;GO:1901265;GO:0017076;GO:0005524;GO:0016787;GO:0003824;GO:0097159;GO:0017111;GO:0032559;GO:0032555;GO:0032550;GO:0032553;GO:0035639;GO:0043167;GO:0030554;GO:0003674;GO:0001882;GO:0016462;GO:0001883;GO:0036094;GO:0043168;	heterocyclic compound binding;nucleotide binding;ribonucleoside binding;hydrolase activity, acting on acid anhydrides, in phosphorus-containing anhydrides;hydrolase activity, acting on acid anhydrides;carbohydrate derivative binding;binding;ATPase activity;nucleoside phosphate binding;purine nucleotide binding;ATP binding;hydrolase activity;catalytic activity;organic cyclic compound binding;nucle…	3;4;5;5;4;3;2;8;4;5;6;3;2;3;7;6;5;6;4;5;3;6;1;4;6;5;3;4;	K03062	map03050;map05169;map05203;	Proteasome;Epstein-Barr virus infection;Viral carcinogenesis;	IPR003960;IPR003593;IPR027417;IPR003959;IPR035244;IPR005937;	ATPase, AAA-type, conserved site;AAA+ ATPase domain;P-loop containing nucleoside triphosphate hydrolase;ATPase, AAA-type, core;26S Proteasome regulatory subunit 4;26S proteasome regulatory subunit P45-like;	nucleus	SPBC4.07c	655	O	[O] Posttranslational modification, protein turnover, chaperones;
T5AMC7	Ribosomal protein L2 OS=Ophiocordyceps sinensis (strain Co18 / CGMCC 3.14243) OX=911162 GN=OCS_00722 PE=4 SV=1	up	1.714	1.46	2.316	1.003	0.693	0.854	0.524	1.093	0.82	0.851	0.518	0.839	2.05217	0.0320021	1.04491	0.82255	2.14432	0.0228846	GO:0044249;GO:0034641;GO:0006807;GO:0034645;GO:1901576;GO:0044260;GO:0043043;GO:0071704;GO:0010467;GO:0002181;GO:0044267;GO:0009987;GO:0009058;GO:0009059;GO:0008150;GO:0008152;GO:0044271;GO:0043604;GO:0044238;GO:1901564;GO:0043603;GO:1901566;GO:0019538;GO:0044237;GO:0043170;GO:0006518;GO:0006412;	cellular biosynthetic process;cellular nitrogen compound metabolic process;nitrogen compound metabolic process;cellular macromolecule biosynthetic process;organic substance biosynthetic process;cellular macromolecule metabolic process;peptide biosynthetic process;organic substance metabolic process;gene expression;cytoplasmic translation;cellular protein metabolic process;cellular process;biosynt…	4;4;3;5;4;4;6;3;5;7;5;2;3;5;1;2;5;6;3;4;5;5;4;3;4;5;6;	GO:0015934;GO:0022625;GO:1990904;GO:0043232;GO:0043226;GO:0022626;GO:0005737;GO:0005623;GO:0044444;GO:0044445;GO:0032991;GO:0005622;GO:0030529;GO:0044446;GO:0044391;GO:0005829;GO:0044464;GO:0043229;GO:0005575;GO:0005840;GO:0043228;GO:0044424;GO:0044422;	large ribosomal subunit;cytosolic large ribosomal subunit;ribonucleoprotein complex;intracellular non-membrane-bounded organelle;organelle;cytosolic ribosome;cytoplasm;cell;cytoplasmic part;cytosolic part;macromolecular complex;intracellular;intracellular ribonucleoprotein complex;intracellular organelle part;ribosomal subunit;cytosol;cell part;intracellular organelle;cellular_component;ribosome;…	5;6;3;4;2;6;4;2;4;5;2;3;4;3;4;5;2;3;1;5;3;3;2;	GO:0003676;GO:0003674;GO:0005488;GO:0019843;GO:1901363;GO:0005198;GO:0003735;GO:0097159;GO:0003723;	nucleic acid binding;molecular_function;binding;rRNA binding;heterocyclic compound binding;structural molecule activity;structural constituent of ribosome;organic cyclic compound binding;RNA binding;	4;1;2;6;3;2;3;3;5;	K02938	map03010;	Ribosome;	IPR014722;IPR022669;IPR014726;IPR022671;IPR012340;IPR022666;IPR002171;IPR008991;	Ribosomal protein L2 domain 2;Ribosomal protein L2, C-terminal;Ribosomal protein L2, domain 3;Ribosomal protein L2, conserved site;Nucleic acid-binding, OB-fold;Ribosomal Proteins L2, RNA binding domain;Ribosomal protein L2;Translation protein SH3-like domain;	mitochondria	YIL018w	387	J	[J] Translation, ribosomal structure and biogenesis;
T5AAV3	Probable electron transfer flavoprotein subunit alpha OS=Ophiocordyceps sinensis (strain Co18 / CGMCC 3.14243) OX=911162 GN=OCS_04741 PE=3 SV=1	up	2.248	1.805	1.275	1.27	0.753	0.718	0.851	0.896	0.742	0.741	0.701	0.892	2.05036	0.0123565	1.04616	0.570129	2.14499	0.0103616	GO:0044237;GO:0006091;GO:0044699;GO:0044710;GO:0022900;GO:0022904;GO:0044763;GO:0009987;GO:0045333;GO:0008152;GO:0055114;GO:0015980;GO:0008150;	cellular metabolic process;generation of precursor metabolites and energy;single-organism process;single-organism metabolic process;electron transport chain;respiratory electron transport chain;single-organism cellular process;cellular process;cellular respiration;metabolic process;oxidation-reduction process;energy derivation by oxidation of organic compounds;biological_process;	3;4;2;3;4;5;3;2;5;2;4;4;1;	GO:0031974;GO:0043229;GO:0043227;GO:0043226;GO:0005737;GO:0005575;GO:0005739;GO:0005759;GO:0043231;GO:0043233;GO:0044464;GO:0005623;GO:0005622;GO:0044446;GO:0070013;GO:0044444;GO:0044429;GO:0044424;GO:0044422;	membrane-enclosed lumen;intracellular organelle;membrane-bounded organelle;organelle;cytoplasm;cellular_component;mitochondrion;mitochondrial matrix;intracellular membrane-bounded organelle;organelle lumen;cell part;cell;intracellular;intracellular organelle part;intracellular organelle lumen;cytoplasmic part;mitochondrial part;intracellular part;organelle part;	2;3;3;2;4;1;5;5;4;3;2;2;3;3;4;4;4;3;2;	GO:1901363;GO:0003674;GO:0043167;GO:0050660;GO:0000166;GO:1901265;GO:0009055;GO:0043168;GO:0050662;GO:0036094;GO:0048037;GO:0097159;GO:0005488;	heterocyclic compound binding;molecular_function;ion binding;flavin adenine dinucleotide binding;nucleotide binding;nucleoside phosphate binding;electron carrier activity;anion binding;coenzyme binding;small molecule binding;cofactor binding;organic cyclic compound binding;binding;	3;1;3;5;4;4;2;4;4;3;3;3;2;	K03522			IPR014731;IPR014730;IPR033947;IPR014729;IPR029035;IPR001308;IPR018206;	Electron transfer flavoprotein, alpha subunit, C-terminal;Electron transfer flavoprotein, alpha/beta-subunit, N-terminal;Electron transfer flavoprotein, alpha subunit, N-terminal;Rossmann-like alpha/beta/alpha sandwich fold;DHS-like NAD/FAD-binding domain;Electron transfer flavoprotein alpha subunit/FixB;Electron transfer flavoprotein subunit alpha, conserved site;	cytosol	SPAC27D7.06	353	C	[C] Energy production and conversion;
T5AM83	Protein kinase-like domain protein OS=Ophiocordyceps sinensis (strain Co18 / CGMCC 3.14243) OX=911162 GN=OCS_01340 PE=4 SV=1	up	1.774	nan	2.109	1.382	1.142	nan	0.712	0.722	0.75	nan	0.713	0.852	2.04386	0.0240737	1.11274	0.587415	2.2743	0.0100937													IPR011009;IPR002575;	Protein kinase-like domain;Aminoglycoside phosphotransferase;	cytosol
T5ABD2	Tyrosinase OS=Ophiocordyceps sinensis (strain Co18 / CGMCC 3.14243) OX=911162 GN=OCS_01538 PE=4 SV=1	up	2.194	1.787	1.245	1.518	0.708	0.827	0.815	0.957	0.734	0.803	1.262	0.916	2.03932	0.00622253	0.89017	0.455405	1.81534	0.0177107							GO:0043169;GO:0005344;GO:0022892;GO:0005215;GO:0043167;GO:0003824;GO:0003674;GO:0005488;GO:0046872;GO:0016491;	cation binding;oxygen transporter activity;substrate-specific transporter activity;transporter activity;ion binding;catalytic activity;molecular_function;binding;metal ion binding;oxidoreductase activity;	4;4;3;2;3;2;1;2;5;3;				IPR002227;IPR008922;	Tyrosinase copper-binding domain;Uncharacterised domain, di-copper centre;	extracellular
T5A6A6	Vacuolar ATP synthase subunit E OS=Ophiocordyceps sinensis (strain Co18 / CGMCC 3.14243) OX=911162 GN=OCS_06353 PE=3 SV=1	up	1.926	1.745	1.764	1.328	0.815	0.788	0.784	0.932	0.793	0.691	0.67	0.852	2.03766	0.000624793	1.10413	0.206468	2.24983	0.000430521	GO:1902600;GO:0015988;GO:0090662;GO:0044699;GO:0015992;GO:0009987;GO:0051179;GO:0098662;GO:0006810;GO:0098660;GO:0006812;GO:0098655;GO:0015672;GO:0006818;GO:0006811;GO:0044765;GO:0008150;GO:0051234;GO:0055085;GO:0034220;GO:0015991;GO:0044763;GO:1902578;	hydrogen ion transmembrane transport;energy coupled proton transmembrane transport, against electrochemical gradient;ATP hydrolysis coupled transmembrane transport;single-organism process;proton transport;cellular process;localization;inorganic cation transmembrane transport;transport;inorganic ion transmembrane transport;cation transport;cation transmembrane transport;monovalent inorganic cation…	7;8;5;2;6;2;2;7;4;6;6;6;7;5;5;4;1;3;4;5;6;3;3;	GO:0016020;GO:0043234;GO:0032991;GO:0005575;GO:0033178;GO:0098796;GO:0044425;GO:0016469;	membrane;protein complex;macromolecular complex;cellular_component;proton-transporting two-sector ATPase complex, catalytic domain;membrane protein complex;membrane part;proton-transporting two-sector ATPase complex;	2;3;2;1;4;3;2;4;	GO:0036442;GO:0003674;GO:0016887;GO:0042625;GO:0042626;GO:0016820;GO:0042623;GO:0022857;GO:0015399;GO:0022804;GO:0016787;GO:0005215;GO:0008324;GO:0017111;GO:0003824;GO:0046961;GO:0022891;GO:0044769;GO:0022890;GO:0016818;GO:0022892;GO:0043492;GO:0016817;GO:0019829;GO:0015077;GO:0015078;GO:0022853;GO:0015075;GO:0016462;GO:0015405;	hydrogen-exporting ATPase activity;molecular_function;ATPase activity;ATPase coupled ion transmembrane transporter activity;ATPase activity, coupled to transmembrane movement of substances;hydrolase activity, acting on acid anhydrides, catalyzing transmembrane movement of substances;ATPase activity, coupled;transmembrane transporter activity;primary active transmembrane transporter activity;activ…	8;1;8;6;6;5;9;3;5;4;3;2;6;7;2;8;4;7;7;5;3;10;4;7;8;9;5;5;6;6;	K02150	map00190;map01100;map04145;map04721;map04966;map05110;map05120;map05323;	Oxidative phosphorylation;Metabolic pathways;Phagosome;Synaptic vesicle cycle;Collecting duct acid secretion;Vibrio cholerae infection;Epithelial cell signaling in Helicobacter pylori infection;Rheumatoid arthritis;	IPR002842;	ATPase, V1/A1 complex, subunit E;	nucleus	YOR332w	189	C	[C] Energy production and conversion;
T5ALK0	DUF2235 domain-containing protein OS=Ophiocordyceps sinensis (strain Co18 / CGMCC 3.14243) OX=911162 GN=OCS_00998 PE=4 SV=1	up	2.674	1.895	2.23	1.756	0.841	1.125	1.01	1.229	0.606	0.654	0.441	0.599	2.03446	0.00262755	1.82826	0.00244137	3.71957	0.000297961													IPR018712;IPR029058;	Domain of unknown function DUF2235;Alpha/Beta hydrolase fold;	mitochondria	322434943	149	S	[S] Function unknown;	COG3673	Uncharacterized protein, PA2063/DUF2235 family
T5A8E4	ABC transporter (Adp1) OS=Ophiocordyceps sinensis (strain Co18 / CGMCC 3.14243) OX=911162 GN=OCS_02555 PE=4 SV=1	up	1.177	1.676	2.417	1.555	1.094	0.907	0.601	0.756	1.018	0.798	0.624	0.727	2.03248	0.0213016	1.06031	0.734523	2.15504	0.0153612	GO:0006810;GO:0008150;GO:0051234;GO:0051179;	transport;biological_process;establishment of localization;localization;	4;1;3;2;	GO:0005783;GO:0005789;GO:0043226;GO:0042175;GO:0043229;GO:0044424;GO:0043227;GO:0031224;GO:0044446;GO:0031090;GO:0016021;GO:0016020;GO:0044432;GO:0005622;GO:0098588;GO:0012505;GO:0043231;GO:0044464;GO:0005623;GO:0005737;GO:0005575;GO:0044444;GO:0044422;GO:0044425;	endoplasmic reticulum;endoplasmic reticulum membrane;organelle;nuclear outer membrane-endoplasmic reticulum membrane network;intracellular organelle;intracellular part;membrane-bounded organelle;intrinsic component of membrane;intracellular organelle part;organelle membrane;integral component of membrane;membrane;endoplasmic reticulum part;intracellular;bounding membrane of organelle;endomembrane…	4;3;2;3;3;3;3;3;3;3;4;2;4;3;4;3;4;2;2;4;1;4;2;2;	GO:0035639;GO:0003674;GO:0005488;GO:0016887;GO:0001883;GO:1901363;GO:0001882;GO:0043168;GO:0043167;GO:1901265;GO:0032549;GO:0017076;GO:0005524;GO:0016787;GO:0000166;GO:0017111;GO:0036094;GO:0003824;GO:0016818;GO:0030554;GO:0097367;GO:0097159;GO:0016817;GO:0016462;GO:0032559;GO:0032555;GO:0032550;GO:0032553;	purine ribonucleoside triphosphate binding;molecular_function;binding;ATPase activity;purine nucleoside binding;heterocyclic compound binding;nucleoside binding;anion binding;ion binding;nucleoside phosphate binding;ribonucleoside binding;purine nucleotide binding;ATP binding;hydrolase activity;nucleotide binding;nucleoside-triphosphatase activity;small molecule binding;catalytic activity;hydrola…	5;1;2;8;5;3;4;4;3;4;5;5;6;3;4;7;3;2;5;6;3;3;4;6;6;5;6;4;				IPR017871;IPR003593;IPR003439;IPR013525;IPR000742;IPR013032;IPR027417;	ABC transporter, conserved site;AAA+ ATPase domain;ABC transporter-like;ABC-2 type transporter;EGF-like domain;EGF-like, conserved site;P-loop containing nucleoside triphosphate hydrolase;	plasma membrane	YCR011c	796	Q	[Q] Secondary metabolites biosynthesis, transport and catabolism;
T5AFQ5	Phospholipase C/P1 nuclease, core OS=Ophiocordyceps sinensis (strain Co18 / CGMCC 3.14243) OX=911162 GN=OCS_03712 PE=4 SV=1	up	1.746	1.871	1.647	1.454	0.844	0.695	0.89	0.893	0.936	0.759	0.734	0.717	2.02229	0.000142672	1.05594	0.545694	2.13541	0.000119802	GO:0044248;GO:0090305;GO:0034641;GO:0006807;GO:1901360;GO:1901361;GO:0006139;GO:1901575;GO:0044265;GO:0044260;GO:0006308;GO:0071704;GO:0090304;GO:0019439;GO:0009987;GO:0006725;GO:0046700;GO:0008150;GO:0008152;GO:0034655;GO:0009056;GO:0009057;GO:0046483;GO:0044238;GO:0044270;GO:0044237;GO:0043170;GO:0006259;	cellular catabolic process;nucleic acid phosphodiester bond hydrolysis;cellular nitrogen compound metabolic process;nitrogen compound metabolic process;organic cyclic compound metabolic process;organic cyclic compound catabolic process;nucleobase-containing compound metabolic process;organic substance catabolic process;cellular macromolecule catabolic process;cellular macromolecule metabolic proc…	4;6;4;3;4;5;4;4;5;4;6;3;5;5;2;4;5;1;2;5;3;5;4;3;5;3;4;5;				GO:0003674;GO:0005488;GO:0003676;GO:0043167;GO:1901363;GO:0046872;GO:0016787;GO:0043169;GO:0016788;GO:0003824;GO:0004518;GO:0004519;GO:0097159;	molecular_function;binding;nucleic acid binding;ion binding;heterocyclic compound binding;metal ion binding;hydrolase activity;cation binding;hydrolase activity, acting on ester bonds;catalytic activity;nuclease activity;endonuclease activity;organic cyclic compound binding;	1;2;4;3;3;5;3;4;4;2;5;6;3;				IPR008947;	Phospholipase C/P1 nuclease domain;	mitochondria
T5AIX5	Aspartyl-tRNA synthetase OS=Ophiocordyceps sinensis (strain Co18 / CGMCC 3.14243) OX=911162 GN=OCS_02511 PE=3 SV=1	up	0.932	1.766	2.119	1.38	0.704	0.788	0.747	0.829	0.82	0.684	0.609	0.73	2.01988	0.0225419	1.07914	0.318035	2.17974	0.0177275	GO:0044281;GO:1901360;GO:0044710;GO:0043043;GO:0043436;GO:0046483;GO:1901564;GO:1901566;GO:0019538;GO:0043038;GO:0043039;GO:0006807;GO:0034660;GO:0044267;GO:0044260;GO:0006422;GO:0008150;GO:0008152;GO:0016070;GO:0044271;GO:0043603;GO:0006518;GO:0044249;GO:0034641;GO:0034645;GO:0044699;GO:0006139;GO:0009987;GO:0006725;GO:0043604;GO:0006082;GO:0043170;GO:0019752;GO:0090304;GO:0006520;GO:0071704;GO:…	small molecule metabolic process;organic cyclic compound metabolic process;single-organism metabolic process;peptide biosynthetic process;oxoacid metabolic process;heterocycle metabolic process;organonitrogen compound metabolic process;organonitrogen compound biosynthetic process;protein metabolic process;amino acid activation;tRNA aminoacylation;nitrogen compound metabolic process;ncRNA metaboli…	4;4;3;6;5;4;4;5;4;5;6;3;6;5;4;8;1;2;5;5;5;5;4;4;5;2;4;2;4;6;4;4;6;5;4;3;5;4;3;5;3;3;3;7;7;6;	GO:0043231;GO:0044424;GO:0043229;GO:0005622;GO:0043227;GO:0043226;GO:0005737;GO:0005634;GO:0044464;GO:0005623;GO:0005575;	intracellular membrane-bounded organelle;intracellular part;intracellular organelle;intracellular;membrane-bounded organelle;organelle;cytoplasm;nucleus;cell part;cell;cellular_component;	4;3;3;3;3;2;4;5;2;2;1;	GO:1901363;GO:0004812;GO:0004815;GO:0000166;GO:0097367;GO:0003674;GO:0005488;GO:0003676;GO:1901265;GO:0032549;GO:0017076;GO:0005524;GO:0043168;GO:0003824;GO:0097159;GO:0032559;GO:0032555;GO:0032550;GO:0032553;GO:0035639;GO:0043167;GO:0030554;GO:0003723;GO:0001883;GO:0001882;GO:0036094;GO:0016874;GO:0016875;GO:0016876;	heterocyclic compound binding;aminoacyl-tRNA ligase activity;aspartate-tRNA ligase activity;nucleotide binding;carbohydrate derivative binding;molecular_function;binding;nucleic acid binding;nucleoside phosphate binding;ribonucleoside binding;purine nucleotide binding;ATP binding;anion binding;catalytic activity;organic cyclic compound binding;adenyl ribonucleotide binding;purine ribonucleotide b…	3;6;7;4;3;1;2;4;4;5;5;6;4;2;3;6;5;6;4;5;3;6;5;5;4;3;3;4;5;	K22503			IPR012340;IPR006195;IPR004364;IPR004523;IPR002312;	Nucleic acid-binding, OB-fold;Aminoacyl-tRNA synthetase, class II;Aminoacyl-tRNA synthetase, class II (D/K/N);Aspartate-tRNA synthetase, type 2;Aspartyl/Asparaginyl-tRNA synthetase, class IIb;	cytosol	YLL018c	473	J	[J] Translation, ribosomal structure and biogenesis;
T5ACV9	6,7-dimethyl-8-ribityllumazine synthase OS=Ophiocordyceps sinensis (strain Co18 / CGMCC 3.14243) OX=911162 GN=OCS_04054 PE=3 SV=1	up	2.144	1.025	1.714	1.672	0.767	0.836	0.801	0.85	0.998	0.977	0.666	0.802	2.01446	0.0118498	0.94511	0.57893	1.90386	0.018767	GO:0008152;GO:0006771;GO:0044237;GO:0042364;GO:0009231;GO:0044249;GO:0006807;GO:0044283;GO:1901362;GO:0044699;GO:0044710;GO:0044711;GO:0042727;GO:0042726;GO:0071704;GO:1901360;GO:0018130;GO:0006767;GO:0006766;GO:1901576;GO:0009987;GO:0009058;GO:0009110;GO:0008150;GO:0044271;GO:0046483;GO:1901564;GO:1901566;GO:0034641;GO:0044763;GO:0044281;	metabolic process;riboflavin metabolic process;cellular metabolic process;water-soluble vitamin biosynthetic process;riboflavin biosynthetic process;cellular biosynthetic process;nitrogen compound metabolic process;small molecule biosynthetic process;organic cyclic compound biosynthetic process;single-organism process;single-organism metabolic process;single-organism biosynthetic process;flavin-c…	2;4;3;5;5;4;3;5;5;2;3;4;6;5;3;4;5;6;5;4;2;3;4;1;5;4;4;5;4;3;4;	GO:1902494;GO:1990234;GO:0009349;GO:0043234;GO:0032991;GO:0044464;GO:0005623;GO:0005575;	catalytic complex;transferase complex;riboflavin synthase complex;protein complex;macromolecular complex;cell part;cell;cellular_component;	4;5;3;3;2;2;2;1;	GO:1902444;GO:0003674;GO:0005488;GO:0016867;GO:0016866;GO:1901363;GO:0043168;GO:0000906;GO:0043167;GO:0016740;GO:0003824;GO:0016853;GO:0097159;	riboflavin binding;molecular_function;binding;intramolecular transferase activity, transferring acyl groups;intramolecular transferase activity;heterocyclic compound binding;anion binding;6,7-dimethyl-8-ribityllumazine synthase activity;ion binding;transferase activity;catalytic activity;isomerase activity;organic cyclic compound binding;	4;1;2;5;4;3;4;6;3;3;2;3;3;	K00794	map00740;map01100;map01110;	Riboflavin metabolism;Metabolic pathways;Biosynthesis of secondary metabolites;	IPR002180;IPR034964;	Lumazine/riboflavin synthase;Lumazine synthase;	extracellular	YOL143c	140	H	[H] Coenzyme transport and metabolism;
T5AEY5	Choline dehydrogenase OS=Ophiocordyceps sinensis (strain Co18 / CGMCC 3.14243) OX=911162 GN=OCS_03309 PE=4 SV=1	up	1.044	0.961	1.407	nan	0.386	0.692	0.616	nan	0.417	0.699	0.716	nan	2.01418	0.0255536	0.92467	0.748043	1.86245	0.0348892							GO:0043168;GO:0050662;GO:0050660;GO:0016614;GO:0097159;GO:0000166;GO:0036094;GO:0003824;GO:0003674;GO:0005488;GO:0048037;GO:0043167;GO:1901363;GO:1901265;GO:0016491;	anion binding;coenzyme binding;flavin adenine dinucleotide binding;oxidoreductase activity, acting on CH-OH group of donors;organic cyclic compound binding;nucleotide binding;small molecule binding;catalytic activity;molecular_function;binding;cofactor binding;ion binding;heterocyclic compound binding;nucleoside phosphate binding;oxidoreductase activity;	4;4;5;4;3;4;3;2;1;2;3;3;3;4;3;	K00108	map00260;map01100;	Glycine, serine and threonine metabolism;Metabolic pathways;	IPR000172;IPR023753;IPR007867;IPR012132;	Glucose-methanol-choline oxidoreductase, N-terminal;FAD/NAD(P)-binding domain;Glucose-methanol-choline oxidoreductase, C-terminal;Glucose-methanol-choline oxidoreductase;	mitochondria	7293012	220	R	[R] General function prediction only;
T5APM6	STF2-like protein OS=Ophiocordyceps sinensis (strain Co18 / CGMCC 3.14243) OX=911162 GN=OCS_00623 PE=4 SV=1	up	1.893	1.333	1.947	1.396	0.782	1.017	0.637	0.827	0.928	1.019	0.689	0.857	2.01317	0.0036541	0.93415	0.60354	1.88062	0.0046854															nucleus
T5AG88	Survival factor 1 OS=Ophiocordyceps sinensis (strain Co18 / CGMCC 3.14243) OX=911162 GN=OCS_02699 PE=4 SV=1	up	2.02	1.782	1.608	1.315	0.786	0.752	0.874	0.933	0.754	0.667	0.827	0.677	2.01045	0.00153642	1.14359	0.108141	2.29915	0.000807154	GO:0006950;GO:0050896;GO:0008150;GO:0006979;	response to stress;response to stimulus;biological_process;response to oxidative stress;	3;2;1;4;	GO:0005737;GO:0043231;GO:0005829;GO:0044464;GO:0043229;GO:0005623;GO:0005622;GO:0005575;GO:0044444;GO:0043226;GO:0044424;GO:0043227;GO:0005634;	cytoplasm;intracellular membrane-bounded organelle;cytosol;cell part;intracellular organelle;cell;intracellular;cellular_component;cytoplasmic part;organelle;intracellular part;membrane-bounded organelle;nucleus;	4;4;5;2;3;2;3;1;4;2;3;3;5;							IPR033394;IPR013931;IPR023374;	Svf1-like, C-terminal;Svf1-like, N-terminal;AttH-like domain;	mitochondria
T5A6S5	Zn 2cys6 transcription factor OS=Ophiocordyceps sinensis (strain Co18 / CGMCC 3.14243) OX=911162 GN=OCS_06831 PE=4 SV=1	up	1.539	1.508	2.005	1.779	0.946	0.913	0.73	0.816	1.014	0.839	0.762	0.807	2.00618	0.000496565	0.99503	0.955902	1.9962	0.00056782										K00275	map00750;map01100;map01120;	Vitamin B6 metabolism;Metabolic pathways;Microbial metabolism in diverse environments;	IPR012349;IPR024624;	FMN-binding split barrel;Pyridoxamine 5'-phosphate oxidase, Alr4036 family, FMN-binding domain;	mitochondria
T5A686	Flavocytochrome c OS=Ophiocordyceps sinensis (strain Co18 / CGMCC 3.14243) OX=911162 GN=OCS_03305 PE=4 SV=1	up	1.961	1.209	1.718	1.187	0.76	0.87	0.633	0.77	0.76	0.867	0.754	0.818	2.00296	0.00851569	0.94811	0.482212	1.89903	0.00992659	GO:0019752;GO:0009060;GO:0044237;GO:0006091;GO:0072350;GO:0044699;GO:0044710;GO:0071704;GO:0043648;GO:0009987;GO:0045333;GO:0008152;GO:0043436;GO:0055114;GO:0015980;GO:0044238;GO:0006082;GO:0006099;GO:0044763;GO:0006106;GO:0006101;GO:0008150;GO:0044281;	carboxylic acid metabolic process;aerobic respiration;cellular metabolic process;generation of precursor metabolites and energy;tricarboxylic acid metabolic process;single-organism process;single-organism metabolic process;organic substance metabolic process;dicarboxylic acid metabolic process;cellular process;cellular respiration;metabolic process;oxoacid metabolic process;oxidation-reduction pr…	6;6;3;4;7;2;3;3;7;2;5;2;5;4;4;3;4;4;3;8;8;1;4;	GO:0043229;GO:0043227;GO:0043226;GO:0005737;GO:0005739;GO:0043231;GO:0005829;GO:0044464;GO:0005623;GO:0005622;GO:0005575;GO:0044444;GO:0044424;GO:0005634;	intracellular organelle;membrane-bounded organelle;organelle;cytoplasm;mitochondrion;intracellular membrane-bounded organelle;cytosol;cell part;cell;intracellular;cellular_component;cytoplasmic part;intracellular part;nucleus;	3;3;2;4;5;4;5;2;2;3;1;4;3;5;	GO:0016156;GO:0003674;GO:0016491;GO:0000104;GO:0016628;GO:0016627;GO:0003824;	fumarate reductase (NADH) activity;molecular_function;oxidoreductase activity;succinate dehydrogenase activity;oxidoreductase activity, acting on the CH-CH group of donors, NAD or NADP as acceptor;oxidoreductase activity, acting on the CH-CH group of donors;catalytic activity;	6;1;3;5;5;4;2;				IPR023753;IPR027477;IPR010960;IPR003953;IPR001199;	FAD/NAD(P)-binding domain;Succinate dehydrogenase/fumarate reductase flavoprotein, catalytic domain;Flavocytochrome c;FAD-dependent oxidoreductase 2, FAD binding domain;Cytochrome b5-like heme/steroid binding domain;	extracellular	SPAC17A2.05	484	C	[C] Energy production and conversion;
T5ANJ5	cAMP-dependent protein kinase regulatory subunit OS=Ophiocordyceps sinensis (strain Co18 / CGMCC 3.14243) OX=911162 GN=OCS_00163 PE=3 SV=1	up	2.07	1.55	1.052	1.477	0.712	0.702	0.912	0.745	0.85	0.792	0.875	0.959	2.00228	0.0115269	0.88349	0.14241	1.76899	0.0196283				GO:1902911;GO:1902494;GO:0061695;GO:1902554;GO:1990234;GO:0005952;GO:0043234;GO:0032991;GO:0044464;GO:0005623;GO:0005622;GO:0005575;GO:0044424;	protein kinase complex;catalytic complex;transferase complex, transferring phosphorus-containing groups;serine/threonine protein kinase complex;transferase complex;cAMP-dependent protein kinase complex;protein complex;macromolecular complex;cell part;cell;intracellular;cellular_component;intracellular part;	7;4;6;8;5;4;3;2;2;2;3;1;3;	GO:0019207;GO:0003674;GO:0005488;GO:0098772;GO:1901363;GO:1901265;GO:0043168;GO:0008603;GO:0019887;GO:0000166;GO:0043167;GO:0017076;GO:0030234;GO:0036094;GO:0032555;GO:0030552;GO:0030551;GO:0030554;GO:0097367;GO:0097159;GO:0032559;GO:0032553;	kinase regulator activity;molecular_function;binding;molecular function regulator;heterocyclic compound binding;nucleoside phosphate binding;anion binding;cAMP-dependent protein kinase regulator activity;protein kinase regulator activity;nucleotide binding;ion binding;purine nucleotide binding;enzyme regulator activity;small molecule binding;purine ribonucleotide binding;cAMP binding;cyclic nucle…	4;1;2;2;3;4;4;6;5;4;3;5;3;3;5;5;5;6;3;3;6;4;	K04739	map04910;	Insulin signaling pathway;	IPR018490;IPR018488;IPR012198;IPR000595;IPR014710;	Cyclic nucleotide-binding-like;Cyclic nucleotide-binding, conserved site;cAMP-dependent protein kinase regulatory subunit;Cyclic nucleotide-binding domain;RmlC-like jelly roll fold;	cytosol, nucleus	YIL033c	274	T	[T] Signal transduction mechanisms;
T5A7K4	Histidyl-tRNA synthetase OS=Ophiocordyceps sinensis (strain Co18 / CGMCC 3.14243) OX=911162 GN=OCS_06581 PE=4 SV=1	up	1.829	1.568	1.528	1.256	0.725	0.734	0.804	0.825	0.812	0.711	0.701	0.861	2.0016	0.000657958	1.00097	0.987611	2.00357	0.000769251	GO:0044281;GO:0007005;GO:0044710;GO:0071840;GO:0043043;GO:0046483;GO:0043436;GO:1901564;GO:1901566;GO:0019538;GO:0043038;GO:0043039;GO:0006427;GO:0006807;GO:0034660;GO:0044267;GO:0044260;GO:0016043;GO:1901360;GO:0032543;GO:0044711;GO:0008150;GO:0008152;GO:0016070;GO:0044271;GO:0043603;GO:0006518;GO:0044249;GO:0034641;GO:0034645;GO:0044699;GO:0006139;GO:0002181;GO:0009987;GO:0006725;GO:0043604;GO:…	small molecule metabolic process;mitochondrion organization;single-organism metabolic process;cellular component organization or biogenesis;peptide biosynthetic process;heterocycle metabolic process;oxoacid metabolic process;organonitrogen compound metabolic process;organonitrogen compound biosynthetic process;protein metabolic process;amino acid activation;tRNA aminoacylation;histidyl-tRNA amino…	4;5;3;2;6;4;5;4;5;4;5;6;8;3;6;5;4;3;4;5;4;1;2;5;5;5;5;4;4;5;2;4;7;2;4;6;4;4;6;5;4;3;5;4;3;5;3;4;3;3;7;4;7;6;	GO:0043231;GO:0005829;GO:0044424;GO:0043229;GO:0005622;GO:0043227;GO:0043226;GO:0005737;GO:0044444;GO:0005739;GO:0044464;GO:0005623;GO:0005575;	intracellular membrane-bounded organelle;cytosol;intracellular part;intracellular organelle;intracellular;membrane-bounded organelle;organelle;cytoplasm;cytoplasmic part;mitochondrion;cell part;cell;cellular_component;	4;5;3;3;3;3;2;4;4;5;2;2;1;	GO:1901363;GO:0004812;GO:0000166;GO:0004821;GO:0097367;GO:0003674;GO:0005488;GO:1901265;GO:0032549;GO:0017076;GO:0005524;GO:0003824;GO:0097159;GO:0032559;GO:0032555;GO:0032550;GO:0032553;GO:0035639;GO:0043168;GO:0043167;GO:0030554;GO:0001883;GO:0001882;GO:0036094;GO:0016874;GO:0016875;GO:0016876;	heterocyclic compound binding;aminoacyl-tRNA ligase activity;nucleotide binding;histidine-tRNA ligase activity;carbohydrate derivative binding;molecular_function;binding;nucleoside phosphate binding;ribonucleoside binding;purine nucleotide binding;ATP binding;catalytic activity;organic cyclic compound binding;adenyl ribonucleotide binding;purine ribonucleotide binding;purine ribonucleoside bindin…	3;6;4;7;3;1;2;4;5;5;6;2;3;6;5;6;4;5;4;3;6;5;4;3;3;4;5;	K01892	map00970;	Aminoacyl-tRNA biosynthesis;	IPR004154;IPR004516;IPR015807;IPR006195;IPR033656;	Anticodon-binding;Histidine-tRNA ligase/ATP phosphoribosyltransferase regulatory subunit;Histidine-tRNA ligase;Aminoacyl-tRNA synthetase, class II;Histidyl-anticodon-binding;	cytosol	SPBC2G2.12	541	J	[J] Translation, ribosomal structure and biogenesis;
T5ACL2	Pyruvate carboxylase OS=Ophiocordyceps sinensis (strain Co18 / CGMCC 3.14243) OX=911162 GN=OCS_03954 PE=4 SV=1	up	1.872	1.43	1.84	1.063	0.773	0.796	0.694	0.838	0.913	0.889	0.737	1.028	2.00096	0.00707199	0.86936	0.132959	1.73956	0.0166228	GO:0044283;GO:0019752;GO:0044723;GO:0044237;GO:0006090;GO:0044699;GO:0044710;GO:0044711;GO:0016051;GO:0071704;GO:0046364;GO:1901576;GO:0009987;GO:0019318;GO:0032787;GO:0009058;GO:0006094;GO:0008150;GO:0008152;GO:0043436;GO:0006006;GO:0044238;GO:0019319;GO:0005975;GO:0006082;GO:0005996;GO:0044763;GO:0044281;	small molecule biosynthetic process;carboxylic acid metabolic process;single-organism carbohydrate metabolic process;cellular metabolic process;pyruvate metabolic process;single-organism process;single-organism metabolic process;single-organism biosynthetic process;carbohydrate biosynthetic process;organic substance metabolic process;monosaccharide biosynthetic process;organic substance biosynthe…	5;6;4;3;8;2;3;4;5;3;6;4;2;6;7;3;8;1;2;5;7;3;7;4;4;5;3;4;	GO:0005737;GO:0044464;GO:0005623;GO:0005622;GO:0005575;GO:0044424;	cytoplasm;cell part;cell;intracellular;cellular_component;intracellular part;	4;2;2;3;1;3;	GO:0005488;GO:0003674;GO:0000166;GO:0035639;GO:0031406;GO:1901681;GO:0016885;GO:0003676;GO:0003677;GO:1901363;GO:0001882;GO:0043169;GO:0004736;GO:0043167;GO:1901265;GO:0032549;GO:0017076;GO:0046872;GO:0005524;GO:0043168;GO:0033218;GO:0001883;GO:0036094;GO:0003824;GO:0019842;GO:0033293;GO:0009374;GO:0016874;GO:0032555;GO:0016879;GO:0043177;GO:0097159;GO:0030554;GO:0097367;GO:0032559;GO:0004075;GO:…	binding;molecular_function;nucleotide binding;purine ribonucleoside triphosphate binding;carboxylic acid binding;sulfur compound binding;ligase activity, forming carbon-carbon bonds;nucleic acid binding;DNA binding;heterocyclic compound binding;nucleoside binding;cation binding;pyruvate carboxylase activity;ion binding;nucleoside phosphate binding;ribonucleoside binding;purine nucleotide binding;…	2;1;4;5;5;3;4;4;5;3;4;4;5;3;4;5;5;5;6;4;3;5;3;2;4;6;4;3;5;4;4;3;6;3;6;5;6;4;	K01958	map00020;map00620;map00720;map01100;map01120;map01200;map01230;	Citrate cycle (TCA cycle);Pyruvate metabolism;Carbon fixation pathways in prokaryotes;Metabolic pathways;Microbial metabolism in diverse environments;Carbon metabolism;Biosynthesis of amino acids;	IPR011761;IPR000089;IPR013785;IPR005930;IPR000891;IPR011054;IPR003379;IPR011764;IPR013815;IPR005481;IPR001882;IPR005482;IPR011053;IPR005479;IPR016185;	ATP-grasp fold;Biotin/lipoyl attachment;Aldolase-type TIM barrel;Pyruvate carboxylase;Pyruvate carboxyltransferase;Rudiment single hybrid motif;Carboxylase, conserved domain;Biotin carboxylation domain;ATP-grasp fold, subdomain 1;Biotin carboxylase-like, N-terminal domain;Biotin-binding site;Biotin carboxylase, C-terminal;Single hybrid motif;Carbamoyl-phosphate synthetase large subunit-like, ATP-…	cytosol	YBR218c	1579	C	[C] Energy production and conversion;
T5A8S5	Coatomer subunit alpha OS=Ophiocordyceps sinensis (strain Co18 / CGMCC 3.14243) OX=911162 GN=OCS_05290 PE=4 SV=1	up	2.345	1.673	1.397	nan	0.725	0.981	1.003	nan	0.81	0.831	0.899	nan	1.99888	0.0378652	1.06654	0.578091	2.13189	0.0275588	GO:0033036;GO:0008104;GO:0044699;GO:0006888;GO:0070727;GO:0006886;GO:0071702;GO:0051641;GO:0034613;GO:0048193;GO:0006810;GO:0045184;GO:0015031;GO:0044765;GO:0008150;GO:0051649;GO:0051234;GO:0051179;GO:1902578;GO:0016192;GO:0006890;GO:0046907;GO:1902582;	macromolecule localization;protein localization;single-organism process;ER to Golgi vesicle-mediated transport;cellular macromolecule localization;intracellular protein transport;organic substance transport;cellular localization;cellular protein localization;Golgi vesicle transport;transport;establishment of protein localization;protein transport;single-organism transport;biological_process;estab…	3;4;2;7;4;6;5;3;5;6;4;4;5;4;1;4;3;2;3;5;7;5;5;	GO:0031090;GO:0043229;GO:0044425;GO:0031988;GO:0000139;GO:0043227;GO:0043226;GO:0005737;GO:0044446;GO:0031982;GO:0030663;GO:0016023;GO:0030135;GO:0016020;GO:0044433;GO:0044431;GO:0030137;GO:0030117;GO:0005794;GO:0098588;GO:0005798;GO:0012505;GO:0012506;GO:0030120;GO:0030126;GO:0043234;GO:0032991;GO:0043231;GO:0030659;GO:0030660;GO:0030662;GO:0044464;GO:0005623;GO:0005622;GO:0005575;GO:0098796;GO:…	organelle membrane;intracellular organelle;membrane part;membrane-bounded vesicle;Golgi membrane;membrane-bounded organelle;organelle;cytoplasm;intracellular organelle part;vesicle;COPI-coated vesicle membrane;cytoplasmic, membrane-bounded vesicle;coated vesicle;membrane;cytoplasmic vesicle part;Golgi apparatus part;COPI-coated vesicle;membrane coat;Golgi apparatus;bounding membrane of organelle;…	3;3;2;5;5;3;2;4;3;4;5;5;6;2;4;4;6;4;4;4;5;3;4;5;5;3;2;4;5;4;4;2;2;3;1;3;4;3;5;3;3;2;4;	GO:0003674;GO:0005198;	molecular_function;structural molecule activity;	1;2;	K05236			IPR006692;IPR017986;IPR001680;IPR015943;IPR010714;IPR016391;IPR011042;IPR020472;IPR011044;IPR011990;IPR019775;	Coatomer, WD associated region;WD40-repeat-containing domain;WD40 repeat;WD40/YVTN repeat-like-containing domain;Coatomer, alpha subunit, C-terminal;Coatomer alpha subunit;Six-bladed beta-propeller, TolB-like;G-protein beta WD-40 repeat;Quinoprotein amine dehydrogenase, beta chain-like;Tetratricopeptide-like helical domain;WD40 repeat, conserved site;	mitochondria	SPBPJ4664.04	1397	U	[U] Intracellular trafficking, secretion, and vesicular transport;
T5A5Y2	Isocitrate dehydrogenase [NAD] subunit, mitochondrial OS=Ophiocordyceps sinensis (strain Co18 / CGMCC 3.14243) OX=911162 GN=OCS_03404 PE=3 SV=1	up	1.703	1.626	1.908	1.488	0.974	0.828	0.751	0.812	0.863	0.759	0.715	0.738	1.99852	0.000151778	1.09431	0.253826	2.18699	6.68871e-05	GO:0019752;GO:0006099;GO:0009060;GO:0006091;GO:0072350;GO:0044699;GO:0044710;GO:0071704;GO:0045333;GO:0009987;GO:0044763;GO:0008152;GO:0043436;GO:0055114;GO:0044238;GO:0015980;GO:0006082;GO:0044237;GO:0006101;GO:0008150;GO:0044281;	carboxylic acid metabolic process;tricarboxylic acid cycle;aerobic respiration;generation of precursor metabolites and energy;tricarboxylic acid metabolic process;single-organism process;single-organism metabolic process;organic substance metabolic process;cellular respiration;cellular process;single-organism cellular process;metabolic process;oxoacid metabolic process;oxidation-reduction process…	6;4;6;4;7;2;3;3;5;2;3;2;5;4;3;4;4;3;8;1;4;	GO:0043227;GO:0043226;GO:0005737;GO:0005623;GO:0005739;GO:0043231;GO:0044464;GO:0043229;GO:0005622;GO:0005575;GO:0044444;GO:0044424;	membrane-bounded organelle;organelle;cytoplasm;cell;mitochondrion;intracellular membrane-bounded organelle;cell part;intracellular organelle;intracellular;cellular_component;cytoplasmic part;intracellular part;	3;2;4;2;5;4;2;3;3;1;4;3;	GO:0051287;GO:1901363;GO:0003674;GO:0005488;GO:0016491;GO:0043169;GO:0000287;GO:0016616;GO:0043167;GO:1901265;GO:0004448;GO:0046872;GO:0050662;GO:0000166;GO:0036094;GO:0003824;GO:0004449;GO:0016614;GO:0048037;GO:0097159;	NAD binding;heterocyclic compound binding;molecular_function;binding;oxidoreductase activity;cation binding;magnesium ion binding;oxidoreductase activity, acting on the CH-OH group of donors, NAD or NADP as acceptor;ion binding;nucleoside phosphate binding;isocitrate dehydrogenase activity;metal ion binding;coenzyme binding;nucleotide binding;small molecule binding;catalytic activity;isocitrate d…	5;3;1;2;3;4;6;5;3;4;6;5;4;4;3;2;7;4;3;3;	K00030	map00020;map01100;map01110;map01120;map01130;map01200;map01210;map01230;	Citrate cycle (TCA cycle);Metabolic pathways;Biosynthesis of secondary metabolites;Microbial metabolism in diverse environments;Biosynthesis of antibiotics;Carbon metabolism;2-Oxocarboxylic acid metabolism;Biosynthesis of amino acids;	IPR024084;IPR004434;IPR019818;	Isopropylmalate dehydrogenase-like domain;Isocitrate dehydrogenase NAD-dependent;Isocitrate/isopropylmalate dehydrogenase, conserved site;	mitochondria	SPAC11G7.03	499	E	[E] Amino acid transport and metabolism;
T5AAL4	4-aminobutyrate aminotransferase OS=Ophiocordyceps sinensis (strain Co18 / CGMCC 3.14243) OX=911162 GN=OCS_04820 PE=3 SV=1	up	1.303	1.451	1.584	1.415	0.884	0.72	0.655	0.636	0.989	0.816	0.772	0.739	1.9872	0.000116318	0.87304	0.232087	1.73492	0.000272482	GO:0019752;GO:0044248;GO:0006807;GO:0044282;GO:0009064;GO:0044699;GO:0044710;GO:1901565;GO:0006520;GO:0006536;GO:0071704;GO:0006082;GO:1901605;GO:0044712;GO:0009448;GO:0043648;GO:0009063;GO:0009987;GO:1901575;GO:0032787;GO:0008150;GO:0009450;GO:0008152;GO:0072329;GO:0043436;GO:0009056;GO:0043605;GO:0044238;GO:1901564;GO:0044270;GO:0043603;GO:0046395;GO:0034641;GO:0044237;GO:0044763;GO:0016054;GO:…	carboxylic acid metabolic process;cellular catabolic process;nitrogen compound metabolic process;small molecule catabolic process;glutamine family amino acid metabolic process;single-organism process;single-organism metabolic process;organonitrogen compound catabolic process;cellular amino acid metabolic process;glutamate metabolic process;organic substance metabolic process;organic acid metaboli…	6;4;3;5;6;2;3;5;4;7;3;4;5;4;5;7;5;2;4;7;1;6;2;7;5;3;6;3;4;5;5;6;4;3;3;5;4;	GO:0043229;GO:0005623;GO:0043227;GO:0043226;GO:0005737;GO:0005739;GO:0043231;GO:0005829;GO:0044464;GO:0005622;GO:0005575;GO:0044444;GO:0044424;	intracellular organelle;cell;membrane-bounded organelle;organelle;cytoplasm;mitochondrion;intracellular membrane-bounded organelle;cytosol;cell part;intracellular;cellular_component;cytoplasmic part;intracellular part;	3;2;3;2;4;5;4;5;2;3;1;4;3;	GO:0005488;GO:1901363;GO:0008483;GO:0003674;GO:0043167;GO:0016740;GO:0016769;GO:0042802;GO:0003824;GO:0003867;GO:0048037;GO:0043168;GO:0005515;GO:0097159;GO:0030170;	binding;heterocyclic compound binding;transaminase activity;molecular_function;ion binding;transferase activity;transferase activity, transferring nitrogenous groups;identical protein binding;catalytic activity;4-aminobutyrate transaminase activity;cofactor binding;anion binding;protein binding;organic cyclic compound binding;pyridoxal phosphate binding;	2;3;5;1;3;3;4;4;2;6;3;4;3;3;4;	K13524	map00250;map00280;map00410;map00640;map00650;map01100;map01120;map04727;	Alanine, aspartate and glutamate metabolism;"Valine, leucine and isoleucine degradation";beta-Alanine metabolism;Propanoate metabolism;Butanoate metabolism;Metabolic pathways;Microbial metabolism in diverse environments;GABAergic synapse;	IPR004631;IPR005814;IPR015422;IPR015424;IPR015421;	4-aminobutyrate aminotransferase, eukaryotic;Aminotransferase class-III;Pyridoxal phosphate-dependent transferase, subdomain 2;Pyridoxal phosphate-dependent transferase;Pyridoxal phosphate-dependent transferase, major region, subdomain 1;	mitochondria	YGR019w	545	E	[E] Amino acid transport and metabolism;
T5A959	Phospholipase D OS=Ophiocordyceps sinensis (strain Co18 / CGMCC 3.14243) OX=911162 GN=OCS_06016 PE=4 SV=1	up	2.2	1.319	1.727	1.383	0.693	0.944	0.792	0.913	0.854	0.906	0.753	1.029	1.98354	0.00785912	0.94353	0.561666	1.87154	0.0103678	GO:0006909;GO:0051049;GO:0048468;GO:0007165;GO:0000767;GO:0032989;GO:0071840;GO:0044712;GO:0044710;GO:0044711;GO:0000003;GO:0048869;GO:0034293;GO:0051704;GO:0000749;GO:0003006;GO:0046486;GO:0051128;GO:0010033;GO:0016192;GO:0044700;GO:0044703;GO:0044702;GO:0048870;GO:0071444;GO:0022607;GO:0006928;GO:0051674;GO:0035556;GO:1901576;GO:1901575;GO:0000902;GO:0006887;GO:0016043;GO:0016042;GO:0065007;GO:…	phagocytosis;regulation of transport;cell development;signal transduction;cell morphogenesis involved in conjugation;cellular component morphogenesis;cellular component organization or biogenesis;single-organism catabolic process;single-organism metabolic process;single-organism biosynthetic process;reproduction;cellular developmental process;sexual sporulation;multi-organism process;response to …	5;4;4;4;5;4;2;4;3;4;2;4;4;2;3;3;5;4;4;5;3;3;3;3;6;4;4;3;5;4;4;5;5;3;5;2;4;5;3;4;4;3;3;4;1;2;3;5;6;5;4;5;2;3;3;4;5;3;4;4;2;4;3;3;2;6;3;5;2;5;3;2;4;4;4;6;4;3;4;6;7;7;6;4;4;4;5;2;4;4;2;3;5;5;4;3;4;4;4;3;3;4;3;2;3;5;2;3;3;4;3;3;5;3;4;	GO:0042764;GO:0005773;GO:0043231;GO:0044424;GO:0043229;GO:0043227;GO:0043226;GO:0042763;GO:0012505;GO:0044444;GO:0016020;GO:0005634;GO:0005628;GO:0044464;GO:0005623;GO:0005622;GO:0005737;GO:0005575;GO:0005768;	ascospore-type prospore;vacuole;intracellular membrane-bounded organelle;intracellular part;intracellular organelle;membrane-bounded organelle;organelle;intracellular immature spore;endomembrane system;cytoplasmic part;membrane;nucleus;prospore membrane;cell part;cell;intracellular;cytoplasm;cellular_component;endosome;	4;5;4;3;3;3;2;3;3;4;2;5;3;2;2;3;4;1;4;	GO:0005543;GO:0004620;GO:0016298;GO:0003674;GO:0005488;GO:0008081;GO:0004630;GO:0016787;GO:0016788;GO:1901981;GO:0035091;GO:0042578;GO:0043168;GO:0043167;GO:0008289;GO:0032266;GO:0070290;GO:0003824;	phospholipid binding;phospholipase activity;lipase activity;molecular_function;binding;phosphoric diester hydrolase activity;phospholipase D activity;hydrolase activity;hydrolase activity, acting on ester bonds;phosphatidylinositol phosphate binding;phosphatidylinositol binding;phosphoric ester hydrolase activity;anion binding;ion binding;lipid binding;phosphatidylinositol-3-phosphate binding;N-a…	4;6;5;1;2;6;7;3;4;6;5;5;4;3;3;7;7;2;	K01115	map00564;map00565;map01100;map01110;map04014;map04024;map04071;map04072;map04144;map04666;map04724;map04912;map05231;	Glycerophospholipid metabolism;Ether lipid metabolism;Metabolic pathways;Biosynthesis of secondary metabolites;Ras signaling pathway;cAMP signaling pathway;Sphingolipid signaling pathway;Phospholipase D signaling pathway;Endocytosis;Fc gamma R-mediated phagocytosis;Glutamatergic synapse;GnRH signaling pathway;Choline metabolism in cancer;	IPR001736;IPR015679;	Phospholipase D/Transphosphatidylase;Phospholipase D family;	cytosol	YKR031c	295	I	[I] Lipid transport and metabolism;
T5AKK2	Histone H2A OS=Ophiocordyceps sinensis (strain Co18 / CGMCC 3.14243) OX=911162 GN=OCS_01922 PE=3 SV=1	up	1.776	1.755	nan	1.353	0.796	0.733	nan	0.939	0.747	0.853	nan	0.732	1.97894	0.00588469	1.05832	0.562397	2.09434	0.00398652	GO:0080090;GO:0019222;GO:1901362;GO:0071840;GO:1901361;GO:0010605;GO:0043044;GO:0040029;GO:0016458;GO:0048519;GO:0060255;GO:2001141;GO:0006402;GO:0046483;GO:0019438;GO:0009056;GO:0009892;GO:0009890;GO:0010629;GO:0006807;GO:0050789;GO:0097659;GO:1901576;GO:1901575;GO:0044265;GO:0044260;GO:0016043;GO:0065007;GO:1901360;GO:0006366;GO:0018130;GO:0009889;GO:0050794;GO:0019439;GO:0008150;GO:0008152;GO:…	regulation of primary metabolic process;regulation of metabolic process;organic cyclic compound biosynthetic process;cellular component organization or biogenesis;organic cyclic compound catabolic process;negative regulation of macromolecule metabolic process;ATP-dependent chromatin remodeling;regulation of gene expression, epigenetic;gene silencing;negative regulation of biological process;regul…	4;3;5;2;5;4;8;6;4;2;4;6;7;4;5;3;3;4;5;3;2;7;4;4;5;4;3;2;4;7;5;4;3;5;1;2;5;5;5;5;6;5;5;6;5;6;7;5;6;6;6;4;4;5;2;4;5;5;5;2;4;7;7;6;7;5;5;4;8;4;5;4;4;5;5;5;5;6;6;3;5;7;6;6;5;5;5;7;6;3;5;3;4;4;9;6;4;4;3;5;3;3;	GO:0033202;GO:0031974;GO:0031981;GO:0000812;GO:0000786;GO:1902494;GO:0000790;GO:0000791;GO:0043234;GO:0043231;GO:0043232;GO:0043233;GO:0044428;GO:0044424;GO:0044427;GO:0044422;GO:0000785;GO:0000228;GO:0005622;GO:0043227;GO:0005719;GO:0044446;GO:0044444;GO:0031011;GO:0044815;GO:0005737;GO:0070603;GO:0044454;GO:0005634;GO:0005739;GO:0044464;GO:0043229;GO:0005623;GO:0043228;GO:0043226;GO:0005694;GO:…	DNA helicase complex;membrane-enclosed lumen;nuclear lumen;Swr1 complex;nucleosome;catalytic complex;nuclear chromatin;euchromatin;protein complex;intracellular membrane-bounded organelle;intracellular non-membrane-bounded organelle;organelle lumen;nuclear part;intracellular part;chromosomal part;organelle part;chromatin;nuclear chromosome;intracellular;membrane-bounded organelle;nuclear euchroma…	4;2;5;5;4;4;4;4;3;4;4;3;4;3;4;2;3;5;3;3;5;3;4;5;4;4;4;5;5;5;2;3;2;3;2;5;2;3;1;4;5;	GO:0031490;GO:1901363;GO:0044877;GO:0001067;GO:0044212;GO:0001012;GO:0001159;GO:0005488;GO:0003676;GO:0003677;GO:0000987;GO:0043565;GO:0097159;GO:0000976;GO:0000978;GO:0043566;GO:1990837;GO:0003690;GO:0003674;GO:0003682;GO:0000975;GO:0000977;	chromatin DNA binding;heterocyclic compound binding;macromolecular complex binding;regulatory region nucleic acid binding;transcription regulatory region DNA binding;RNA polymerase II regulatory region DNA binding;core promoter proximal region DNA binding;binding;nucleic acid binding;DNA binding;core promoter proximal region sequence-specific DNA binding;sequence-specific DNA binding;organic cycl…	5;3;3;5;7;8;8;2;4;5;9;6;3;8;10;6;7;6;1;4;6;9;	K11251	map05034;map05322;	Alcoholism;Systemic lupus erythematosus;	IPR002119;IPR032454;IPR007125;IPR009072;	Histone H2A;Histone H2A, C-terminal domain;Histone H2A/H2B/H3;Histone-fold;	nucleus	SPBC11B10.10c	187	B	[B] Chromatin structure and dynamics;
T5ANK0	Spore coat assembly protein SafA OS=Ophiocordyceps sinensis (strain Co18 / CGMCC 3.14243) OX=911162 GN=OCS_00168 PE=4 SV=1	up	1.801	nan	1.654	1.358	0.938	nan	0.749	0.755	0.986	nan	0.799	0.942	1.97091	0.00540702	0.89549	0.320607	1.76494	0.00805817													IPR018392;	LysM domain;	extracellular	20807784	82.8	M	[M] Cell wall/membrane/envelope biogenesis;	COG1388	LysM repeat
T5AKV1	Hydrophobin 2 OS=Ophiocordyceps sinensis (strain Co18 / CGMCC 3.14243) OX=911162 GN=OCS_01077 PE=4 SV=1	up	1.361	1.299	2.097	1.266	0.781	0.727	0.642	0.909	1.691	1.318	0.69	1.24	1.96893	0.0113622	0.61936	0.0704423	1.21948	0.380185	GO:0009987;GO:0045230;GO:0030448;GO:0030447;GO:0016043;GO:0008150;GO:0071840;GO:0045229;GO:0044699;GO:0040007;	cellular process;capsule organization;hyphal growth;filamentous growth;cellular component organization;biological_process;cellular component organization or biogenesis;external encapsulating structure organization;single-organism process;growth;	2;5;4;3;3;1;2;4;2;2;	GO:0005618;GO:0071944;GO:0030446;GO:0044464;GO:0005623;GO:0030312;GO:0005575;GO:0005576;GO:0009277;	cell wall;cell periphery;hyphal cell wall;cell part;cell;external encapsulating structure;cellular_component;extracellular region;fungal-type cell wall;	4;3;6;2;2;3;1;2;5;							IPR010636;	Cerato-ulmin hydrophobin family;	extracellular
T5AQG1	Calcofluor white hypersensitive protein OS=Ophiocordyceps sinensis (strain Co18 / CGMCC 3.14243) OX=911162 GN=OCS_00228 PE=4 SV=1	up	1.693	1.261	1.833	1.125	0.688	0.793	0.645	0.878	0.88	0.892	0.608	0.896	1.96804	0.00634766	0.91697	0.468265	1.80464	0.0114482															extracellular
T5A6F9	UDP-galactopyranose mutase OS=Ophiocordyceps sinensis (strain Co18 / CGMCC 3.14243) OX=911162 GN=OCS_03229 PE=4 SV=1	up	1.899	1.426	2.196	1.2	0.802	0.934	0.649	1.034	0.855	0.961	0.676	0.975	1.9658	0.0138695	0.98616	0.915357	1.93856	0.0135922															peroxisome	436836571	448	H	[H] Coenzyme transport and metabolism;	COG1232	Protoporphyrinogen oxidase
T5A7I9	NADH:ubiquinone oxidoreductase 21.3kD subunit 21.3b OS=Ophiocordyceps sinensis (strain Co18 / CGMCC 3.14243) OX=911162 GN=OCS_06596 PE=4 SV=1	up	1.528	nan	1.865	1.497	0.784	nan	0.786	0.921	0.906	nan	0.722	0.828	1.96306	0.00318162	1.01425	0.8757	1.99104	0.00329683	GO:0008104;GO:0071840;GO:0065002;GO:0033036;GO:0071702;GO:0006605;GO:0045184;GO:0072655;GO:0006839;GO:0070585;GO:0006886;GO:0016043;GO:0007005;GO:0006626;GO:0006810;GO:0008150;GO:0051234;GO:0046907;GO:0070727;GO:0030150;GO:0071806;GO:0072594;GO:0017038;GO:0055085;GO:0044743;GO:0044699;GO:0033365;GO:1990542;GO:0009987;GO:0034613;GO:0044765;GO:0044763;GO:0051649;GO:0051179;GO:1902578;GO:0051641;GO:…	protein localization;cellular component organization or biogenesis;intracellular protein transmembrane transport;macromolecule localization;organic substance transport;protein targeting;establishment of protein localization;establishment of protein localization to mitochondrion;mitochondrial transport;protein localization to mitochondrion;intracellular protein transport;cellular component organiz…	4;2;6;3;5;6;4;6;6;7;6;3;5;5;4;1;3;5;4;5;5;5;5;4;6;2;6;5;2;5;4;3;4;2;3;3;4;5;5;4;	GO:0098573;GO:0031975;GO:0016021;GO:0016020;GO:0031967;GO:0043234;GO:0043231;GO:0044429;GO:0044424;GO:0044425;GO:0044422;GO:0044464;GO:0043229;GO:0043227;GO:0043226;GO:0005743;GO:0044446;GO:0044444;GO:0031305;GO:0031304;GO:0031301;GO:0031300;GO:0031224;GO:0005737;GO:0031090;GO:0005739;GO:0044455;GO:0019866;GO:0005623;GO:0005622;GO:0005740;GO:0005744;GO:0032592;GO:0098800;GO:0031966;GO:0032991;GO:…	intrinsic component of mitochondrial membrane;envelope;integral component of membrane;membrane;organelle envelope;protein complex;intracellular membrane-bounded organelle;mitochondrial part;intracellular part;membrane part;organelle part;cell part;intracellular organelle;membrane-bounded organelle;organelle;mitochondrial inner membrane;intracellular organelle part;cytoplasmic part;integral compon…	4;3;4;2;4;3;4;4;3;2;2;2;3;3;2;5;3;4;6;5;4;3;3;4;3;5;3;4;2;3;5;5;5;4;4;2;1;3;4;	GO:0008137;GO:0015405;GO:0003674;GO:0008565;GO:0022884;GO:0015399;GO:0022804;GO:0003824;GO:0022891;GO:0022892;GO:0003954;GO:0016491;GO:0050136;GO:0015450;GO:0008320;GO:0016655;GO:0016651;GO:0005215;GO:0022857;	NADH dehydrogenase (ubiquinone) activity;P-P-bond-hydrolysis-driven transmembrane transporter activity;molecular_function;protein transporter activity;macromolecule transmembrane transporter activity;primary active transmembrane transporter activity;active transmembrane transporter activity;catalytic activity;substrate-specific transmembrane transporter activity;substrate-specific transporter act…	7;6;1;4;5;5;4;2;4;3;5;3;6;6;5;5;4;2;3;						cytosol
T5AHM3	Pyridoxine biosynthesis protein OS=Ophiocordyceps sinensis (strain Co18 / CGMCC 3.14243) OX=911162 GN=OCS_02200 PE=3 SV=1	up	nan	2.206	1.494	1.692	nan	0.71	1.141	0.908	nan	0.539	0.511	0.357	1.95435	0.0234335	1.96091	0.0300955	3.83227	0.00376818	GO:0009108;GO:0006732;GO:0051186;GO:0044249;GO:0034641;GO:0006807;GO:0044281;GO:0044283;GO:1901362;GO:0072525;GO:0044699;GO:1901576;GO:0044710;GO:0044711;GO:0072524;GO:0051188;GO:0071704;GO:1901360;GO:0042822;GO:0042823;GO:0018130;GO:0006767;GO:0006766;GO:0046184;GO:0009987;GO:0006725;GO:0009058;GO:0009110;GO:0008150;GO:0008152;GO:0019438;GO:1901564;GO:0090407;GO:0046483;GO:0044271;GO:0006081;GO:…	coenzyme biosynthetic process;coenzyme metabolic process;cofactor metabolic process;cellular biosynthetic process;cellular nitrogen compound metabolic process;nitrogen compound metabolic process;small molecule metabolic process;small molecule biosynthetic process;organic cyclic compound biosynthetic process;pyridine-containing compound biosynthetic process;single-organism process;organic substanc…	6;5;4;4;4;3;4;5;5;6;2;4;3;4;5;5;3;4;5;6;5;6;5;5;2;4;3;4;1;2;5;4;5;4;5;4;5;5;3;5;4;4;4;3;5;5;4;				GO:0036381;GO:0003674;GO:0016840;GO:0016843;GO:0016829;GO:0003824;	pyridoxal 5'-phosphate synthase (glutamine hydrolysing) activity;molecular_function;carbon-nitrogen lyase activity;amine-lyase activity;lyase activity;catalytic activity;	6;1;4;5;3;2;	K06215	map00750;	Vitamin B6 metabolism;	IPR013785;IPR011060;IPR001852;IPR033755;	Aldolase-type TIM barrel;Ribulose-phosphate binding barrel;Pyridoxal 5'-phosphate synthase subunit PdxS/SNZ;PdxS/SNZ N-terminal domain;	cytosol	SPAC29B12.04	192	H	[H] Coenzyme transport and metabolism;
T5AL30	26S proteasome non-ATPase regulatory subunit 12 OS=Ophiocordyceps sinensis (strain Co18 / CGMCC 3.14243) OX=911162 GN=OCS_01819 PE=4 SV=1	up	2.159	1.356	1.38	1.568	0.715	0.995	0.847	0.759	0.763	0.825	0.865	0.779	1.94905	0.00718876	1.02599	0.760928	1.99969	0.00518961										K03035	map03050;map05169;	Proteasome;Epstein-Barr virus infection;	IPR000717;IPR035297;IPR011991;	Proteasome component (PCI) domain;26S Proteasome non-ATPase regulatory subunit 12;Winged helix-turn-helix DNA-binding domain;	nucleus	Hs4506221	432	O	[O] Posttranslational modification, protein turnover, chaperones;
T5ANC4	Ribosomal protein L21e OS=Ophiocordyceps sinensis (strain Co18 / CGMCC 3.14243) OX=911162 GN=OCS_00200 PE=4 SV=1	up	1.93	1.64	1.835	1.361	0.749	0.858	0.87	1.012	0.857	0.759	0.729	0.797	1.93922	0.000970906	1.11044	0.202241	2.15341	0.000409199	GO:0044249;GO:0034641;GO:0006807;GO:0034645;GO:1901576;GO:0044260;GO:0043043;GO:0071704;GO:0010467;GO:0002181;GO:0044267;GO:0009987;GO:0009058;GO:0009059;GO:0008150;GO:0008152;GO:0044271;GO:0043604;GO:0044238;GO:1901564;GO:0043603;GO:1901566;GO:0019538;GO:0044237;GO:0043170;GO:0006518;GO:0006412;	cellular biosynthetic process;cellular nitrogen compound metabolic process;nitrogen compound metabolic process;cellular macromolecule biosynthetic process;organic substance biosynthetic process;cellular macromolecule metabolic process;peptide biosynthetic process;organic substance metabolic process;gene expression;cytoplasmic translation;cellular protein metabolic process;cellular process;biosynt…	4;4;3;5;4;4;6;3;5;7;5;2;3;5;1;2;5;6;3;4;5;5;4;3;4;5;6;	GO:0015934;GO:0022625;GO:1990904;GO:0043232;GO:0005623;GO:0022626;GO:0005622;GO:0043226;GO:0005737;GO:0044445;GO:0032991;GO:0030529;GO:0044446;GO:0044391;GO:0005840;GO:0005829;GO:0044464;GO:0043229;GO:0005575;GO:0044444;GO:0043228;GO:0044424;GO:0044422;	large ribosomal subunit;cytosolic large ribosomal subunit;ribonucleoprotein complex;intracellular non-membrane-bounded organelle;cell;cytosolic ribosome;intracellular;organelle;cytoplasm;cytosolic part;macromolecular complex;intracellular ribonucleoprotein complex;intracellular organelle part;ribosomal subunit;ribosome;cytosol;cell part;intracellular organelle;cellular_component;cytoplasmic part;…	5;6;3;4;2;6;3;2;4;5;2;4;3;4;5;5;2;3;1;4;3;3;2;	GO:0003674;GO:0005198;GO:0003735;	molecular_function;structural molecule activity;structural constituent of ribosome;	1;2;3;	K02889	map03010;	Ribosome;	IPR001147;IPR008991;IPR018259;	Ribosomal protein L21e;Translation protein SH3-like domain;Ribosomal protein L21e, conserved site;	mitochondria	YBR191w	213	J	[J] Translation, ribosomal structure and biogenesis;
T5AN24	DNA helicase OS=Ophiocordyceps sinensis (strain Co18 / CGMCC 3.14243) OX=911162 GN=OCS_01170 PE=3 SV=1	up	1.928	nan	1.78	1.2	0.85	nan	0.606	1.08	0.864	nan	0.831	1.03	1.93532	0.0387678	0.93064	0.696189	1.8011	0.0342961	GO:1902315;GO:0071840;GO:0044710;GO:0044711;GO:0006260;GO:0006261;GO:0044092;GO:0032392;GO:0033260;GO:0046483;GO:0006270;GO:0044786;GO:0071103;GO:0043170;GO:1901576;GO:0051346;GO:0044260;GO:0016043;GO:0065007;GO:1901360;GO:0065009;GO:0006139;GO:0050790;GO:0008150;GO:0008152;GO:0051336;GO:0044249;GO:0034641;GO:0034645;GO:0043086;GO:0044699;GO:0032508;GO:0009987;GO:0006725;GO:0007049;GO:0051097;GO:…	nuclear cell cycle DNA replication initiation;cellular component organization or biogenesis;single-organism metabolic process;single-organism biosynthetic process;DNA replication;DNA-dependent DNA replication;negative regulation of molecular function;DNA geometric change;nuclear DNA replication;heterocycle metabolic process;DNA replication initiation;cell cycle DNA replication;DNA conformation ch…	5;2;3;4;6;7;4;7;5;4;6;5;6;4;4;6;4;3;2;4;3;4;4;1;2;5;4;4;5;5;2;8;2;4;4;7;6;4;3;5;5;4;6;3;6;5;3;5;3;4;3;5;3;5;	GO:0031974;GO:0031261;GO:0031981;GO:0043234;GO:0043231;GO:0043232;GO:0043233;GO:0005829;GO:0044428;GO:0044424;GO:0044427;GO:0044422;GO:0043229;GO:0043228;GO:0000228;GO:0043227;GO:0043226;GO:0042555;GO:0005654;GO:0005656;GO:0005657;GO:0044446;GO:0044444;GO:0005737;GO:0005634;GO:0044454;GO:0044451;GO:0044464;GO:0005623;GO:0005622;GO:0036387;GO:0005694;GO:0032991;GO:0032993;GO:0005575;GO:0070013;GO:…	membrane-enclosed lumen;DNA replication preinitiation complex;nuclear lumen;protein complex;intracellular membrane-bounded organelle;intracellular non-membrane-bounded organelle;organelle lumen;cytosol;nuclear part;intracellular part;chromosomal part;organelle part;intracellular organelle;non-membrane-bounded organelle;nuclear chromosome;membrane-bounded organelle;organelle;MCM complex;nucleoplas…	2;4;5;3;4;4;3;5;4;3;4;2;3;3;5;3;2;4;5;5;5;3;4;4;5;5;5;2;2;3;4;5;2;3;1;4;6;	GO:1901363;GO:0000166;GO:0004386;GO:0016818;GO:0097367;GO:0016817;GO:0003674;GO:0005488;GO:0003676;GO:0003677;GO:0003678;GO:1901265;GO:0032549;GO:0017076;GO:0005524;GO:0016787;GO:0003824;GO:0097159;GO:0016462;GO:0032559;GO:0032555;GO:0032550;GO:0032553;GO:0035639;GO:0043565;GO:1990837;GO:0043167;GO:0003690;GO:0030554;GO:0003688;GO:0044877;GO:0003682;GO:0001883;GO:0001882;GO:0017111;GO:0036094;GO:…	heterocyclic compound binding;nucleotide binding;helicase activity;hydrolase activity, acting on acid anhydrides, in phosphorus-containing anhydrides;carbohydrate derivative binding;hydrolase activity, acting on acid anhydrides;molecular_function;binding;nucleic acid binding;DNA binding;DNA helicase activity;nucleoside phosphate binding;ribonucleoside binding;purine nucleotide binding;ATP binding…	3;4;8;5;3;4;1;2;4;5;9;4;5;5;6;3;2;3;6;6;5;6;4;5;6;7;3;6;6;8;3;4;5;4;7;3;4;	K02209	map03030;map04110;map04111;map04113;	DNA replication;Cell cycle;Cell cycle - yeast;Meiosis - yeast;	IPR031327;IPR033762;IPR018525;IPR012340;IPR001208;IPR027925;IPR027417;IPR008048;	Mini-chromosome maintenance protein;MCM OB domain;Mini-chromosome maintenance, conserved site;Nucleic acid-binding, OB-fold;MCM domain;MCM N-terminal domain;P-loop containing nucleoside triphosphate hydrolase;DNA replication licensing factor Mcm;	nucleus	YLR274w	867	L	[L] Replication, recombination and repair;
T5AM57	Sec63 domain protein OS=Ophiocordyceps sinensis (strain Co18 / CGMCC 3.14243) OX=911162 GN=OCS_01362 PE=4 SV=1	up	2.156	1.324	1.616	1.3	0.659	0.896	0.862	0.902	0.723	0.821	0.782	0.897	1.92708	0.00994692	1.02979	0.73685	1.98449	0.00780706	GO:1901360;GO:0046483;GO:0000393;GO:0000398;GO:0022607;GO:0006807;GO:0044260;GO:0016043;GO:0065003;GO:0071840;GO:0008150;GO:0008152;GO:0016070;GO:0016071;GO:0034641;GO:0006139;GO:0022618;GO:0022613;GO:0008380;GO:0009987;GO:0006725;GO:0043170;GO:0043933;GO:0090304;GO:0034622;GO:0071826;GO:0071704;GO:0010467;GO:0000375;GO:0000377;GO:0044238;GO:0044237;GO:0044085;GO:0006396;GO:0006397;	organic cyclic compound metabolic process;heterocycle metabolic process;spliceosomal conformational changes to generate catalytic conformation;mRNA splicing, via spliceosome;cellular component assembly;nitrogen compound metabolic process;cellular macromolecule metabolic process;cellular component organization;macromolecular complex assembly;cellular component organization or biogenesis;biological…	4;4;6;8;4;3;4;3;5;2;1;2;5;6;4;4;5;4;7;2;4;4;4;5;6;5;3;5;8;9;3;3;3;6;7;	GO:0005829;GO:0043231;GO:0044428;GO:0044424;GO:0044422;GO:0046540;GO:1990904;GO:0043229;GO:0005622;GO:0043227;GO:0043226;GO:0044446;GO:0044444;GO:0005634;GO:0044464;GO:0005623;GO:0097525;GO:0097526;GO:0030529;GO:0032991;GO:0030532;GO:0005737;GO:0005575;GO:0005682;GO:0005681;	cytosol;intracellular membrane-bounded organelle;nuclear part;intracellular part;organelle part;U4/U6 x U5 tri-snRNP complex;ribonucleoprotein complex;intracellular organelle;intracellular;membrane-bounded organelle;organelle;intracellular organelle part;cytoplasmic part;nucleus;cell part;cell;spliceosomal snRNP complex;spliceosomal tri-snRNP complex;intracellular ribonucleoprotein complex;macrom…	5;4;4;3;2;8;3;3;3;3;2;3;4;5;2;2;6;7;4;2;5;4;1;7;5;	GO:0008186;GO:1901363;GO:0000166;GO:0004386;GO:0016818;GO:0097367;GO:0016817;GO:0070035;GO:0003674;GO:0005488;GO:0003676;GO:1901265;GO:0042623;GO:0032549;GO:0017076;GO:0005524;GO:0016787;GO:0003824;GO:0097159;GO:0016462;GO:0032559;GO:0032555;GO:0032550;GO:0032553;GO:0008026;GO:0035639;GO:0043168;GO:0043167;GO:0030554;GO:0003724;GO:0016887;GO:0001883;GO:0001882;GO:0017111;GO:0004004;GO:0036094;	RNA-dependent ATPase activity;heterocyclic compound binding;nucleotide binding;helicase activity;hydrolase activity, acting on acid anhydrides, in phosphorus-containing anhydrides;carbohydrate derivative binding;hydrolase activity, acting on acid anhydrides;purine NTP-dependent helicase activity;molecular_function;binding;nucleic acid binding;nucleoside phosphate binding;ATPase activity, coupled;…	10;3;4;8;5;3;4;9;1;2;4;4;9;5;5;6;3;2;3;6;6;5;6;4;10;5;4;3;6;9;8;5;4;7;10;3;	K12854	map03040;	Spliceosome;	IPR004179;IPR011545;IPR003593;IPR001650;IPR014756;IPR014001;IPR011991;IPR000008;IPR027417;	Sec63 domain;DEAD/DEAH box helicase domain;AAA+ ATPase domain;Helicase, C-terminal;Immunoglobulin E-set;Helicase superfamily 1/2, ATP-binding domain;Winged helix-turn-helix DNA-binding domain;C2 domain;P-loop containing nucleoside triphosphate hydrolase;	cytosol	SPAC9.03c	2265	A	[A] RNA processing and modification;
T5A9I4	Alcohol dehydrogenase superfamily, zinc-type OS=Ophiocordyceps sinensis (strain Co18 / CGMCC 3.14243) OX=911162 GN=OCS_05039 PE=3 SV=1	up	0.94	1.516	1.385	1.446	0.8	0.578	0.582	0.785	1.275	1.028	1.048	1.331	1.92604	0.00447588	0.58629	0.00271487	1.12922	0.356226				GO:0005737;GO:0044464;GO:0005623;GO:0005622;GO:0005575;GO:0044424;	cytoplasm;cell part;cell;intracellular;cellular_component;intracellular part;	4;2;2;3;1;3;	GO:0043169;GO:0046872;GO:0016614;GO:0016616;GO:0046914;GO:0003824;GO:0004022;GO:0016491;GO:0003674;GO:0005488;GO:0043167;GO:0008270;	cation binding;metal ion binding;oxidoreductase activity, acting on CH-OH group of donors;oxidoreductase activity, acting on the CH-OH group of donors, NAD or NADP as acceptor;transition metal ion binding;catalytic activity;alcohol dehydrogenase (NAD) activity;oxidoreductase activity;molecular_function;binding;ion binding;zinc ion binding;	4;5;4;5;6;2;6;3;1;2;3;7;	K13953	map00010;map00071;map00350;map00625;map00626;map00830;map00980;map00982;map01100;map01110;map01120;map01130;map01220;	Glycolysis / Gluconeogenesis;Fatty acid degradation;Tyrosine metabolism;Chloroalkane and chloroalkene degradation;Naphthalene degradation;Retinol metabolism;Metabolism of xenobiotics by cytochrome P450;Drug metabolism - cytochrome P450;Metabolic pathways;Biosynthesis of secondary metabolites;Microbial metabolism in diverse environments;Biosynthesis of antibiotics;Degradation of aromatic compounds;	IPR020843;IPR013149;IPR002328;IPR011032;IPR013154;IPR016040;	Polyketide synthase, enoylreductase domain;Alcohol dehydrogenase, C-terminal;Alcohol dehydrogenase, zinc-type, conserved site;GroES-like;Alcohol dehydrogenase, N-terminal;NAD(P)-binding domain;	cytosol	YMR083w	389	Q	[Q] Secondary metabolites biosynthesis, transport and catabolism;
T4ZX60	Arg-6 protein OS=Ophiocordyceps sinensis (strain Co18 / CGMCC 3.14243) OX=911162 GN=OCS_06573 PE=3 SV=1	up	1.763	1.39	1.68	1.277	0.796	0.807	0.687	0.884	0.774	0.838	0.782	0.717	1.925	0.000971718	1.02025	0.751477	1.964	0.00071987	GO:0044281;GO:0044283;GO:0044710;GO:0044711;GO:0043436;GO:1901564;GO:1901566;GO:0016053;GO:0006807;GO:0009064;GO:1901576;GO:0008150;GO:0008152;GO:0008652;GO:0046394;GO:0044249;GO:0044699;GO:1901605;GO:1901607;GO:0009987;GO:0006082;GO:0009084;GO:0019752;GO:0006520;GO:0006526;GO:0006525;GO:0071704;GO:0009058;GO:0044763;GO:0044238;GO:0044237;	small molecule metabolic process;small molecule biosynthetic process;single-organism metabolic process;single-organism biosynthetic process;oxoacid metabolic process;organonitrogen compound metabolic process;organonitrogen compound biosynthetic process;organic acid biosynthetic process;nitrogen compound metabolic process;glutamine family amino acid metabolic process;organic substance biosynthetic…	4;5;3;4;5;4;5;5;3;6;4;1;2;5;6;4;2;5;6;2;4;7;6;4;8;7;3;3;3;3;3;	GO:0031974;GO:0043231;GO:0043233;GO:0044429;GO:0044424;GO:0044422;GO:0043229;GO:0043227;GO:0043226;GO:0005737;GO:0044446;GO:0044444;GO:0005739;GO:0044464;GO:0005623;GO:0005622;GO:0005759;GO:0005575;GO:0070013;	membrane-enclosed lumen;intracellular membrane-bounded organelle;organelle lumen;mitochondrial part;intracellular part;organelle part;intracellular organelle;membrane-bounded organelle;organelle;cytoplasm;intracellular organelle part;cytoplasmic part;mitochondrion;cell part;cell;intracellular;mitochondrial matrix;cellular_component;intracellular organelle lumen;	2;4;3;4;3;2;3;3;2;4;3;4;5;2;2;3;5;1;4;	GO:0051287;GO:0016597;GO:1901363;GO:0016620;GO:0000166;GO:0016740;GO:0016746;GO:0016747;GO:0097367;GO:0003674;GO:0005488;GO:1901265;GO:0008080;GO:0032549;GO:0017076;GO:0005524;GO:0004042;GO:0016301;GO:0003824;GO:0003942;GO:0097159;GO:0031406;GO:0032559;GO:0032555;GO:0032550;GO:0032553;GO:0035639;GO:0016491;GO:0043168;GO:0043169;GO:0043167;GO:0016410;GO:0048037;GO:0030554;GO:0043177;GO:0016407;GO:…	NAD binding;amino acid binding;heterocyclic compound binding;oxidoreductase activity, acting on the aldehyde or oxo group of donors, NAD or NADP as acceptor;nucleotide binding;transferase activity;transferase activity, transferring acyl groups;transferase activity, transferring acyl groups other than amino-acyl groups;carbohydrate derivative binding;molecular_function;binding;nucleoside phosphate…	5;6;3;5;4;3;4;5;3;1;2;4;7;5;5;6;8;5;2;6;3;5;6;5;6;4;5;3;4;4;3;6;3;6;4;6;4;5;4;4;5;3;4;	K12659	map00220;map01100;map01110;map01130;map01210;map01230;	Arginine biosynthesis;Metabolic pathways;Biosynthesis of secondary metabolites;Biosynthesis of antibiotics;2-Oxocarboxylic acid metabolism;Biosynthesis of amino acids;	IPR023013;IPR006855;IPR000706;IPR016040;IPR000534;	N-acetyl-gamma-glutamyl-phosphate reductase, active site;Vertebrate-like NAGS Gcn5-related N-acetyltransferase (GNAT) domain;N-acetyl-gamma-glutamyl-phosphate reductase, type 1;NAD(P)-binding domain;Semialdehyde dehydrogenase, NAD-binding;	mitochondria	SPAC4G9.09c_2	433	E	[E] Amino acid transport and metabolism;
T5A5Z1	ATP synthase D chain OS=Ophiocordyceps sinensis (strain Co18 / CGMCC 3.14243) OX=911162 GN=OCS_03394 PE=4 SV=1	up	1.845	1.617	0.893	1.304	0.635	0.68	0.716	0.91	0.814	0.737	1.128	1.191	1.92419	0.0195408	0.75995	0.119388	1.46227	0.105746	GO:0045184;GO:0033036;GO:0008104;GO:0006810;GO:0015031;GO:0008150;GO:0071702;GO:0051234;GO:0051179;	establishment of protein localization;macromolecule localization;protein localization;transport;protein transport;biological_process;organic substance transport;establishment of localization;localization;	4;3;4;4;5;1;5;3;2;	GO:0005737;GO:0043231;GO:0005634;GO:0044464;GO:0005623;GO:0005622;GO:0005575;GO:0043229;GO:0043226;GO:0044424;GO:0043227;	cytoplasm;intracellular membrane-bounded organelle;nucleus;cell part;cell;intracellular;cellular_component;intracellular organelle;organelle;intracellular part;membrane-bounded organelle;	4;4;5;2;2;3;1;3;2;3;3;				K03626			IPR016641;IPR002715;	Nascent polypeptide-associated complex subunit alpha;Nascent polypeptide-associated complex NAC domain;	cytosol	Hs5031931	149	K	[K] Transcription;
T5AH83	AT hook-like protein OS=Ophiocordyceps sinensis (strain Co18 / CGMCC 3.14243) OX=911162 GN=OCS_03186 PE=4 SV=1	up	2.114	nan	2.035	1.591	0.89	nan	1.054	1.041	0.909	nan	0.474	0.78	1.92297	0.00581448	1.38003	0.12062	2.65372	0.00456128													IPR000116;IPR017956;	High mobility group protein HMGA;AT hook, DNA-binding motif;	nucleus
T5A643	Long-chain-fatty-acid--CoA ligase FAA2 OS=Ophiocordyceps sinensis (strain Co18 / CGMCC 3.14243) OX=911162 GN=OCS_06417 PE=4 SV=1	up	2.307	0.877	1.869	1.485	0.731	1.117	0.734	0.823	0.765	1.127	0.686	0.684	1.92012	0.0482132	1.04384	0.8062	2.00429	0.0434421	GO:0006631;GO:0019752;GO:0000302;GO:0044281;GO:0009651;GO:0044699;GO:0044710;GO:0071704;GO:0001676;GO:0006629;GO:0009628;GO:0009987;GO:0032787;GO:0006950;GO:0008150;GO:0001101;GO:0008152;GO:0043436;GO:0042221;GO:0044255;GO:0010035;GO:0006979;GO:1901700;GO:0044238;GO:0006082;GO:0006970;GO:0050896;GO:0044237;GO:0010193;GO:0044763;	fatty acid metabolic process;carboxylic acid metabolic process;response to reactive oxygen species;small molecule metabolic process;response to salt stress;single-organism process;single-organism metabolic process;organic substance metabolic process;long-chain fatty acid metabolic process;lipid metabolic process;response to abiotic stimulus;cellular process;monocarboxylic acid metabolic process;r…	5;6;5;4;5;2;3;3;6;4;3;2;7;3;1;4;2;5;3;4;4;4;4;3;4;4;2;3;5;3;	GO:0042579;GO:0043229;GO:0043227;GO:0043226;GO:0005737;GO:0005623;GO:0005777;GO:0043231;GO:0044464;GO:0005622;GO:0005575;GO:0044444;GO:0044424;	microbody;intracellular organelle;membrane-bounded organelle;organelle;cytoplasm;cell;peroxisome;intracellular membrane-bounded organelle;cell part;intracellular;cellular_component;cytoplasmic part;intracellular part;	5;3;3;2;4;2;6;4;2;3;1;4;3;	GO:0015645;GO:0035639;GO:1901363;GO:0003674;GO:0001883;GO:0000166;GO:0001882;GO:0043167;GO:0032555;GO:0004467;GO:1901265;GO:0032549;GO:0017076;GO:0005524;GO:0043168;GO:0036094;GO:0003824;GO:0016874;GO:0016877;GO:0030554;GO:0097159;GO:0097367;GO:0032559;GO:0032550;GO:0032553;GO:0005488;	fatty acid ligase activity;purine ribonucleoside triphosphate binding;heterocyclic compound binding;molecular_function;purine nucleoside binding;nucleotide binding;nucleoside binding;ion binding;purine ribonucleotide binding;long-chain fatty acid-CoA ligase activity;nucleoside phosphate binding;ribonucleoside binding;purine nucleotide binding;ATP binding;anion binding;small molecule binding;catal…	5;5;3;1;5;4;4;3;5;6;4;5;5;6;4;3;2;3;4;6;3;3;6;6;4;2;	K01897	map00061;map00071;map01100;map01212;map03320;map04146;map04920;	Fatty acid biosynthesis;Fatty acid degradation;Metabolic pathways;Fatty acid metabolism;PPAR signaling pathway;Peroxisome;Adipocytokine signaling pathway;	IPR000873;IPR020845;	AMP-dependent synthetase/ligase;AMP-binding, conserved site;	cytosol	At5g27600	380	I	[I] Lipid transport and metabolism;
T5AAC0	Glycogen synthase kinase 3 OS=Ophiocordyceps sinensis (strain Co18 / CGMCC 3.14243) OX=911162 GN=OCS_05531 PE=3 SV=1	up	1.677	nan	2.08	1.412	0.973	nan	0.845	0.882	0.893	nan	0.477	0.673	1.91446	0.0141582	1.32159	0.157265	2.5301	0.0103167	GO:0010564;GO:0007165;GO:0071840;GO:0051716;GO:0071704;GO:0018212;GO:0018193;GO:0048518;GO:0007088;GO:0044700;GO:0018209;GO:0019538;GO:0051783;GO:0007067;GO:0043170;GO:0050789;GO:0044267;GO:0007346;GO:0044260;GO:0016043;GO:0065007;GO:0007049;GO:0050794;GO:0043412;GO:0036211;GO:0008150;GO:0008152;GO:0007059;GO:0050896;GO:0033044;GO:0033045;GO:0033047;GO:0033043;GO:0016310;GO:0051128;GO:0023052;GO:…	regulation of cell cycle process;signal transduction;cellular component organization or biogenesis;cellular response to stimulus;organic substance metabolic process;peptidyl-tyrosine modification;peptidyl-amino acid modification;positive regulation of biological process;regulation of mitotic nuclear division;single organism signaling;peptidyl-serine modification;protein metabolic process;regulati…	5;4;2;3;3;8;7;2;6;3;8;4;5;5;4;2;5;5;4;3;2;4;3;5;5;1;2;4;2;6;5;6;5;6;4;2;8;2;9;6;2;5;4;4;5;5;8;8;4;4;4;5;7;5;6;3;4;4;3;6;5;4;3;4;5;4;3;	GO:0043231;GO:0005829;GO:0044424;GO:0043229;GO:0043227;GO:0044444;GO:0005737;GO:0005634;GO:0044464;GO:0005623;GO:0005622;GO:0043226;GO:0005575;	intracellular membrane-bounded organelle;cytosol;intracellular part;intracellular organelle;membrane-bounded organelle;cytoplasmic part;cytoplasm;nucleus;cell part;cell;intracellular;organelle;cellular_component;	4;5;3;3;3;4;4;5;2;2;3;2;1;	GO:1901363;GO:0000166;GO:0016740;GO:0004712;GO:0004713;GO:0097367;GO:0003674;GO:0005488;GO:1901265;GO:0032549;GO:0017076;GO:0005524;GO:0043168;GO:0016301;GO:0003824;GO:0016773;GO:0016772;GO:0032559;GO:0032555;GO:0032550;GO:0032553;GO:0035639;GO:0043167;GO:0030554;GO:0097159;GO:0001882;GO:0004674;GO:0001883;GO:0004672;GO:0036094;	heterocyclic compound binding;nucleotide binding;transferase activity;protein serine/threonine/tyrosine kinase activity;protein tyrosine kinase activity;carbohydrate derivative binding;molecular_function;binding;nucleoside phosphate binding;ribonucleoside binding;purine nucleotide binding;ATP binding;anion binding;kinase activity;catalytic activity;phosphotransferase activity, alcohol group as ac…	3;4;3;7;7;3;1;2;4;5;5;6;4;5;2;5;4;6;5;6;4;5;3;6;3;4;7;5;6;3;	K03083	map04012;map04062;map04110;map04151;map04310;map04340;map04360;map04390;map04510;map04550;map04660;map04662;map04711;map04722;map04728;map04910;map04916;map04917;map04919;map04931;map04932;map05010;map05160;map05162;map05164;map05166;map05169;map05200;map05210;map05213;map05215;map05217;	ErbB signaling pathway;Chemokine signaling pathway;Cell cycle;PI3K-Akt signaling pathway;Wnt signaling pathway;Hedgehog signaling pathway;Axon guidance;Hippo signaling pathway;Focal adhesion;Signaling pathways regulating pluripotency of stem cells;T cell receptor signaling pathway;B cell receptor signaling pathway;Circadian rhythm - fly;Neurotrophin signaling pathway;Dopaminergic synapse;Insulin …	IPR017441;IPR008271;IPR011009;IPR000719;	Protein kinase, ATP binding site;Serine/threonine-protein kinase, active site;Protein kinase-like domain;Protein kinase domain;	nucleus	SPAC1687.15	539	G	[G] Carbohydrate transport and metabolism;
T5AFV1	RNA recognition domain-containing protein OS=Ophiocordyceps sinensis (strain Co18 / CGMCC 3.14243) OX=911162 GN=OCS_03595 PE=4 SV=1	up	2.012	1.482	1.807	1.255	0.777	0.844	0.863	0.941	0.846	0.946	0.756	0.857	1.91417	0.00383856	1.00587	0.925752	1.9254	0.00383666	GO:0015931;GO:0051169;GO:0071166;GO:0051168;GO:0051028;GO:0043170;GO:0044699;GO:0016973;GO:0071705;GO:0071704;GO:0010467;GO:0071702;GO:0033036;GO:0006405;GO:0006406;GO:0006810;GO:0006913;GO:0044765;GO:0008150;GO:0008152;GO:0051649;GO:0051236;GO:0051234;GO:0051179;GO:1902578;GO:0051641;GO:0050658;GO:0006403;GO:0071426;GO:0046907;GO:0071427;GO:0050657;GO:1902582;	nucleobase-containing compound transport;nuclear transport;ribonucleoprotein complex localization;nuclear export;mRNA transport;macromolecule metabolic process;single-organism process;poly(A)+ mRNA export from nucleus;nitrogen compound transport;organic substance metabolic process;gene expression;organic substance transport;macromolecule localization;RNA export from nucleus;mRNA export from nucle…	6;6;4;8;6;4;2;6;5;3;5;5;3;6;6;4;7;4;1;2;4;4;3;2;3;3;5;4;5;5;6;7;5;	GO:0043231;GO:0043226;GO:0043229;GO:0043227;GO:0005737;GO:0005634;GO:0005829;GO:0044464;GO:0005623;GO:0005622;GO:0005575;GO:0044444;GO:0044424;	intracellular membrane-bounded organelle;organelle;intracellular organelle;membrane-bounded organelle;cytoplasm;nucleus;cytosol;cell part;cell;intracellular;cellular_component;cytoplasmic part;intracellular part;	4;2;3;3;4;5;5;2;2;3;1;4;3;	GO:0003674;GO:0005488;GO:0003676;GO:1901363;GO:0000166;GO:1901265;GO:0036094;GO:0097159;GO:0003723;	molecular_function;binding;nucleic acid binding;heterocyclic compound binding;nucleotide binding;nucleoside phosphate binding;small molecule binding;organic cyclic compound binding;RNA binding;	1;2;4;3;4;4;3;3;5;				IPR000504;	RNA recognition motif domain;	nucleus	SPAC328.05	185	R	[R] General function prediction only;
T5ADL5	NmrA family protein OS=Ophiocordyceps sinensis (strain Co18 / CGMCC 3.14243) OX=911162 GN=OCS_03633 PE=4 SV=1	up	1.655	1.39	2.114	1.317	0.827	0.961	0.673	0.931	1.192	0.97	0.594	1.047	1.9092	0.0069331	0.89193	0.499813	1.70287	0.0232055													IPR016040;IPR008030;	NAD(P)-binding domain;NmrA-like domain;	mitochondria
T5AND3	Glutathione S-transferase OS=Ophiocordyceps sinensis (strain Co18 / CGMCC 3.14243) OX=911162 GN=OCS_00954 PE=4 SV=1	up	1.938	1.916	1.571	1.469	0.726	0.877	0.99	1.019	0.802	0.59	0.458	0.702	1.90865	0.000961339	1.41536	0.0373152	2.70141	0.000246481															nucleus
T5AES6	Probable electron transfer flavoprotein subunit beta OS=Ophiocordyceps sinensis (strain Co18 / CGMCC 3.14243) OX=911162 GN=OCS_03364 PE=3 SV=1	up	2.129	1.614	1.406	1.162	0.719	0.849	0.854	0.886	0.818	0.92	0.977	0.972	1.90781	0.0114617	0.89721	0.119444	1.71169	0.0200774	GO:0034440;GO:0006631;GO:0006635;GO:0019752;GO:0044248;GO:0009062;GO:0044281;GO:0044282;GO:0006091;GO:0044242;GO:0044699;GO:0044712;GO:0044710;GO:0030258;GO:0016042;GO:0071704;GO:0022900;GO:0022904;GO:0015980;GO:0045333;GO:0006629;GO:0009987;GO:1901575;GO:0032787;GO:0008150;GO:0008152;GO:0072329;GO:0043436;GO:0019395;GO:0044255;GO:0009056;GO:0055114;GO:0044238;GO:0006082;GO:0033539;GO:0016054;GO:…	lipid oxidation;fatty acid metabolic process;fatty acid beta-oxidation;carboxylic acid metabolic process;cellular catabolic process;fatty acid catabolic process;small molecule metabolic process;small molecule catabolic process;generation of precursor metabolites and energy;cellular lipid catabolic process;single-organism process;single-organism catabolic process;single-organism metabolic process;…	5;5;7;6;4;6;4;5;4;5;2;4;3;5;5;3;4;5;4;5;4;2;4;7;1;2;7;5;6;4;3;4;3;4;8;5;3;6;3;	GO:0043229;GO:0043227;GO:0043226;GO:0044446;GO:0070062;GO:0005739;GO:0005737;GO:0005759;GO:0031974;GO:1903561;GO:0031982;GO:0043230;GO:0043231;GO:0043233;GO:0044464;GO:0005622;GO:0005575;GO:0070013;GO:0044444;GO:0005576;GO:0044429;GO:0044424;GO:0005623;GO:0044421;GO:0044422;	intracellular organelle;membrane-bounded organelle;organelle;intracellular organelle part;extracellular exosome;mitochondrion;cytoplasm;mitochondrial matrix;membrane-enclosed lumen;extracellular vesicle;vesicle;extracellular organelle;intracellular membrane-bounded organelle;organelle lumen;cell part;intracellular;cellular_component;intracellular organelle lumen;cytoplasmic part;extracellular reg…	3;3;2;3;4;5;4;5;2;3;4;3;4;3;2;3;1;4;4;2;4;3;2;2;2;	GO:0003674;GO:0009055;	molecular_function;electron carrier activity;	1;2;	K03521			IPR014730;IPR014729;IPR033948;IPR012255;	Electron transfer flavoprotein, alpha/beta-subunit, N-terminal;Rossmann-like alpha/beta/alpha sandwich fold;Electron transfer flavoprotein, beta subunit, N-terminal;Electron transfer flavoprotein, beta subunit;	mitochondria	YGR207c	228	C	[C] Energy production and conversion;
T5ALR5	Protein related to DNA damage-responsive protein 48 OS=Ophiocordyceps sinensis (strain Co18 / CGMCC 3.14243) OX=911162 GN=OCS_00731 PE=4 SV=1	up	1.785	1.289	0.855	0.946	0.626	0.682	0.719	0.534	0.743	0.898	0.908	1.087	1.90357	0.0356727	0.70435	0.0160743	1.34076	0.212471															mitochondria
T5AAM6	Acyl-CoA dehydrogenase/oxidase OS=Ophiocordyceps sinensis (strain Co18 / CGMCC 3.14243) OX=911162 GN=OCS_05418 PE=4 SV=1	up	1.149	1.446	2.121	1.276	0.888	0.812	0.609	0.85	1.007	0.876	0.87	0.902	1.89681	0.0199273	0.8643	0.126401	1.6394	0.0369696	GO:0034440;GO:0006631;GO:0006635;GO:0019752;GO:0044248;GO:0009062;GO:0044282;GO:0044242;GO:0044699;GO:0044710;GO:0030258;GO:0071704;GO:0042592;GO:0065007;GO:0065008;GO:0016042;GO:0044712;GO:0006629;GO:0009987;GO:1901575;GO:0032787;GO:0008152;GO:0072329;GO:0043436;GO:0019395;GO:0044255;GO:0009056;GO:0055114;GO:0055088;GO:0044238;GO:0006082;GO:0016054;GO:0046395;GO:0044763;GO:0044237;GO:0048878;GO:…	lipid oxidation;fatty acid metabolic process;fatty acid beta-oxidation;carboxylic acid metabolic process;cellular catabolic process;fatty acid catabolic process;small molecule catabolic process;cellular lipid catabolic process;single-organism process;single-organism metabolic process;lipid modification;organic substance metabolic process;homeostatic process;biological regulation;regulation of bio…	5;5;7;6;4;6;5;5;2;3;5;3;4;2;3;5;4;4;2;4;7;2;7;5;6;4;3;4;6;3;4;5;6;3;3;5;8;1;4;				GO:1901681;GO:0003674;GO:0005488;GO:0043167;GO:1901363;GO:0016491;GO:0043168;GO:0050662;GO:0050660;GO:0016627;GO:0000062;GO:0000166;GO:1901265;GO:0052890;GO:0036094;GO:0003824;GO:0048037;GO:0009055;GO:0097159;GO:0003995;	sulfur compound binding;molecular_function;binding;ion binding;heterocyclic compound binding;oxidoreductase activity;anion binding;coenzyme binding;flavin adenine dinucleotide binding;oxidoreductase activity, acting on the CH-CH group of donors;fatty-acyl-CoA binding;nucleotide binding;nucleoside phosphate binding;oxidoreductase activity, acting on the CH-CH group of donors, with a flavin as acce…	3;1;2;3;3;3;4;4;5;4;4;4;4;5;3;2;3;2;3;5;				IPR009075;IPR006089;IPR013786;IPR009100;IPR006091;IPR018506;IPR001199;	Acyl-CoA dehydrogenase/oxidase C-terminal;Acyl-CoA dehydrogenase, conserved site;Acyl-CoA dehydrogenase/oxidase, N-terminal;Acyl-CoA dehydrogenase/oxidase, N-terminal and middle domain;Acyl-CoA oxidase/dehydrogenase, central domain;Cytochrome b5, heme-binding site;Cytochrome b5-like heme/steroid binding domain;	cytoskeleton	85375125	196	I	[I] Lipid transport and metabolism;	COG1960	Acyl-CoA dehydrogenase related to the alkylation response protein AidB
T5AM86	MaoC-like dehydratase OS=Ophiocordyceps sinensis (strain Co18 / CGMCC 3.14243) OX=911162 GN=OCS_00605 PE=4 SV=1	up	1.798	1.331	2.181	1.438	0.985	0.945	0.708	0.928	0.805	0.981	0.603	0.854	1.89233	0.0077138	1.0996	0.451373	2.08079	0.00560548													IPR029069;IPR002539;	HotDog domain;MaoC-like domain;	cytosol	CE01215	140	I	[I] Lipid transport and metabolism;
T5AQ91	Phosphatidylserine decarboxylase proenzyme 2 OS=Ophiocordyceps sinensis (strain Co18 / CGMCC 3.14243) OX=911162 GN=PSD2 PE=3 SV=1	up	1.9	1.365	1.438	1.412	0.68	0.932	0.918	0.705	0.827	0.878	0.962	1.094	1.89025	0.00226359	0.86014	0.190462	1.6259	0.00522958	GO:0044281;GO:0044283;GO:0044710;GO:0046337;GO:0046486;GO:1901564;GO:1901566;GO:0019538;GO:0019637;GO:0006807;GO:1901576;GO:0097164;GO:0006629;GO:0009308;GO:0044711;GO:0042439;GO:0008152;GO:0006576;GO:0090407;GO:0051604;GO:0008654;GO:0016540;GO:0008150;GO:1901617;GO:1901615;GO:0044249;GO:0034641;GO:0044699;GO:0006508;GO:0006646;GO:0006644;GO:0046165;GO:0009987;GO:0044106;GO:0016485;GO:0044255;GO:…	small molecule metabolic process;small molecule biosynthetic process;single-organism metabolic process;phosphatidylethanolamine metabolic process;glycerolipid metabolic process;organonitrogen compound metabolic process;organonitrogen compound biosynthetic process;protein metabolic process;organophosphate metabolic process;nitrogen compound metabolic process;organic substance biosynthetic process;…	4;5;3;7;5;4;5;4;4;3;4;4;4;5;4;4;2;6;5;5;5;7;1;5;4;4;4;2;5;7;5;6;2;5;6;4;4;5;6;5;6;6;5;3;5;3;3;5;3;3;5;4;	GO:0031984;GO:0005773;GO:0005774;GO:0005795;GO:0005794;GO:0032153;GO:0043231;GO:0005829;GO:0044422;GO:0043229;GO:0005622;GO:0043227;GO:0043226;GO:0044431;GO:0044437;GO:0005737;GO:0044424;GO:0012505;GO:0000139;GO:0044446;GO:0044444;GO:0098852;GO:0044440;GO:0000324;GO:0000323;GO:0000322;GO:0000329;GO:0010008;GO:0031090;GO:0044464;GO:0005623;GO:0098805;GO:0098588;GO:0016020;GO:0005575;GO:0098791;GO:…	organelle subcompartment;vacuole;vacuolar membrane;Golgi stack;Golgi apparatus;cell division site;intracellular membrane-bounded organelle;cytosol;organelle part;intracellular organelle;intracellular;membrane-bounded organelle;organelle;Golgi apparatus part;vacuolar part;cytoplasm;intracellular part;endomembrane system;Golgi membrane;intracellular organelle part;cytoplasmic part;lytic vacuole mem…	4;5;4;5;4;3;4;5;2;3;3;3;2;4;4;4;3;3;5;3;4;5;5;7;6;6;6;5;3;2;2;3;4;2;1;5;4;	GO:0005543;GO:0003674;GO:0005488;GO:0016830;GO:0016831;GO:0043168;GO:0016829;GO:0043167;GO:0008289;GO:0004609;GO:0003824;	phospholipid binding;molecular_function;binding;carbon-carbon lyase activity;carboxy-lyase activity;anion binding;lyase activity;ion binding;lipid binding;phosphatidylserine decarboxylase activity;catalytic activity;	4;1;2;4;5;4;3;3;3;6;2;	K01613	map00564;map01100;map01110;	Glycerophospholipid metabolism;Metabolic pathways;Biosynthesis of secondary metabolites;	IPR018247;IPR033179;IPR033177;IPR003817;IPR011992;IPR000008;IPR002048;	EF-Hand 1, calcium-binding site;Phosphatidylserine decarboxylase, prokaryotic type 2;Phosphatidylserine decarboxylase;Phosphatidylserine decarboxylase-related;EF-hand domain pair;C2 domain;EF-hand domain;	mitochondria	SPAC31G5.15	637	I	[I] Lipid transport and metabolism;
T5AP17	Serine/threonine-protein phosphatase OS=Ophiocordyceps sinensis (strain Co18 / CGMCC 3.14243) OX=911162 GN=OCS_00810 PE=3 SV=1	up	1.663	nan	1.87	1.319	0.87	1.098	0.687	0.775	0.711	nan	0.724	0.789	1.88612	0.00664151	1.1567	0.325456	2.18165	0.00572628	GO:0016311;GO:0006470;GO:0044237;GO:0043170;GO:0023052;GO:0044267;GO:0051716;GO:0044260;GO:0050789;GO:0071704;GO:0065007;GO:0044699;GO:0044700;GO:0009987;GO:0006464;GO:0050794;GO:0043412;GO:0036211;GO:0008150;GO:0008152;GO:0007154;GO:0044238;GO:0019538;GO:0050896;GO:0006796;GO:0006793;GO:0044763;GO:0007165;	dephosphorylation;protein dephosphorylation;cellular metabolic process;macromolecule metabolic process;signaling;cellular protein metabolic process;cellular response to stimulus;cellular macromolecule metabolic process;regulation of biological process;organic substance metabolic process;biological regulation;single-organism process;single organism signaling;cellular process;cellular protein modif…	6;7;3;4;2;5;3;4;2;3;2;2;3;2;6;3;5;5;1;2;4;3;4;2;5;4;3;4;	GO:0043229;GO:0043227;GO:0043226;GO:0005737;GO:0005634;GO:0043234;GO:0032991;GO:0043231;GO:0044464;GO:0005623;GO:0005622;GO:0005575;GO:0044424;	intracellular organelle;membrane-bounded organelle;organelle;cytoplasm;nucleus;protein complex;macromolecular complex;intracellular membrane-bounded organelle;cell part;cell;intracellular;cellular_component;intracellular part;	3;3;2;4;5;3;2;4;2;2;3;1;3;	GO:0005488;GO:0016791;GO:0004721;GO:0042578;GO:0003674;GO:0043169;GO:0046872;GO:0016787;GO:0003824;GO:0016788;GO:0043167;GO:0004722;	binding;phosphatase activity;phosphoprotein phosphatase activity;phosphoric ester hydrolase activity;molecular_function;cation binding;metal ion binding;hydrolase activity;catalytic activity;hydrolase activity, acting on ester bonds;ion binding;protein serine/threonine phosphatase activity;	2;6;7;5;1;4;5;3;2;4;3;8;	K04460	map04010;	MAPK signaling pathway;	IPR019734;IPR027363;IPR006186;IPR011236;IPR011990;IPR013235;IPR004843;IPR013026;IPR029052;	Tetratricopeptide repeat;Methylthioribose-1-phosphate isomerase-like, N-terminal domain;Serine/threonine-specific protein phosphatase/bis(5-nucleosyl)-tetraphosphatase;Serine/threonine protein phosphatase 5;Tetratricopeptide-like helical domain;PPP domain;Calcineurin-like phosphoesterase domain, ApaH type;Tetratricopeptide repeat-containing domain;Metallo-dependent phosphatase-like;	cytosol	SPBC3F6.01c	595	R	[R] General function prediction only;
T5AA04	Urease accessory protein ureG OS=Ophiocordyceps sinensis (strain Co18 / CGMCC 3.14243) OX=911162 GN=OCS_01978 PE=3 SV=1	up	1.826	1.119	1.923	1.007	0.732	0.869	0.701	0.817	0.892	1.048	0.771	1.002	1.88363	0.028099	0.84002	0.0875759	1.58228	0.0687849	GO:0044237;GO:0044699;GO:0006807;GO:0071941;GO:0044710;GO:0009987;GO:0008150;GO:0008152;GO:0034641;GO:0071704;GO:1901564;GO:0043603;GO:0044763;GO:0019627;GO:0044281;	cellular metabolic process;single-organism process;nitrogen compound metabolic process;nitrogen cycle metabolic process;single-organism metabolic process;cellular process;biological_process;metabolic process;cellular nitrogen compound metabolic process;organic substance metabolic process;organonitrogen compound metabolic process;cellular amide metabolic process;single-organism cellular process;ur…	3;2;3;4;3;2;1;2;4;3;4;5;3;4;4;	GO:0043226;GO:0043229;GO:0043227;GO:0005737;GO:0005634;GO:0043231;GO:0005829;GO:0044464;GO:0005623;GO:0005622;GO:0005575;GO:0044444;GO:0044424;	organelle;intracellular organelle;membrane-bounded organelle;cytoplasm;nucleus;intracellular membrane-bounded organelle;cytosol;cell part;cell;intracellular;cellular_component;cytoplasmic part;intracellular part;	2;3;3;4;5;4;5;2;2;3;1;4;3;	GO:0016151;GO:0035639;GO:1901363;GO:0003674;GO:0005488;GO:0000166;GO:0043168;GO:1901265;GO:0001882;GO:0043169;GO:0046914;GO:0019001;GO:0043167;GO:0032561;GO:0001883;GO:0032549;GO:0017076;GO:0046872;GO:0005525;GO:0016787;GO:0003924;GO:0017111;GO:0036094;GO:0003824;GO:0032555;GO:0016818;GO:0097367;GO:0097159;GO:0016817;GO:0016462;GO:0032550;GO:0032553;	nickel cation binding;purine ribonucleoside triphosphate binding;heterocyclic compound binding;molecular_function;binding;nucleotide binding;anion binding;nucleoside phosphate binding;nucleoside binding;cation binding;transition metal ion binding;guanyl nucleotide binding;ion binding;guanyl ribonucleotide binding;purine nucleoside binding;ribonucleoside binding;purine nucleotide binding;metal ion…	7;5;3;1;2;4;4;4;4;4;6;6;3;6;5;5;5;5;6;3;8;7;3;2;5;5;3;3;4;6;6;4;	K03189			IPR003495;IPR004400;IPR012202;IPR027417;	CobW/HypB/UreG, nucleotide-binding domain;Urease accessory protein UreG;[NiFe]-hydrogenase/urease maturation factor, Ni2-binding GTPase;P-loop containing nucleoside triphosphate hydrolase;	cytosol	383459634	323	O	[O] Posttranslational modification, protein turnover, chaperones;	COG0378	Ni2+-binding GTPase involved in regulation of expression and maturation of urease and hydrogenase
T5A7N7	Glutamate synthase OS=Ophiocordyceps sinensis (strain Co18 / CGMCC 3.14243) OX=911162 GN=OCS_05857 PE=4 SV=1	up	1.403	1.734	1.706	1.38	0.895	0.701	0.89	0.824	0.939	0.837	0.817	0.925	1.88005	0.000452028	0.94088	0.37784	1.7689	0.000509147	GO:0043648;GO:0044283;GO:0019752;GO:0044249;GO:0006807;GO:0009064;GO:0044710;GO:0043650;GO:0006520;GO:0006541;GO:0071704;GO:0044699;GO:0008652;GO:1901605;GO:1901607;GO:1901576;GO:0009987;GO:0009058;GO:0044711;GO:0008152;GO:0009084;GO:0043436;GO:1901564;GO:0044238;GO:1901566;GO:0006082;GO:0046394;GO:0044763;GO:0016053;GO:0044237;GO:0006536;GO:0006537;GO:0097054;GO:0008150;GO:0044281;	dicarboxylic acid metabolic process;small molecule biosynthetic process;carboxylic acid metabolic process;cellular biosynthetic process;nitrogen compound metabolic process;glutamine family amino acid metabolic process;single-organism metabolic process;dicarboxylic acid biosynthetic process;cellular amino acid metabolic process;glutamine metabolic process;organic substance metabolic process;single…	7;5;6;4;3;6;3;7;4;7;3;2;5;5;6;4;2;3;4;2;7;5;4;3;5;4;6;3;5;3;7;8;9;1;4;	GO:0043226;GO:0043229;GO:0043227;GO:0044464;GO:0044444;GO:0005739;GO:0005737;GO:0005623;GO:0043231;GO:0005622;GO:0005575;GO:0044424;GO:0005829;	organelle;intracellular organelle;membrane-bounded organelle;cell part;cytoplasmic part;mitochondrion;cytoplasm;cell;intracellular membrane-bounded organelle;intracellular;cellular_component;intracellular part;cytosol;	2;3;3;2;4;5;4;2;4;3;1;3;5;	GO:0015930;GO:0043169;GO:0016040;GO:0003674;GO:0005488;GO:0043167;GO:1901363;GO:1901265;GO:0016491;GO:0043168;GO:0050662;GO:0050660;GO:0051540;GO:0046914;GO:0000166;GO:0010181;GO:0005506;GO:0036094;GO:0003824;GO:0048037;GO:0045181;GO:0046872;GO:0051538;GO:0016639;GO:0097159;GO:0051536;GO:0004355;GO:0097367;GO:0016638;GO:0032553;	glutamate synthase activity;cation binding;glutamate synthase (NADH) activity;molecular_function;binding;ion binding;heterocyclic compound binding;nucleoside phosphate binding;oxidoreductase activity;anion binding;coenzyme binding;flavin adenine dinucleotide binding;metal cluster binding;transition metal ion binding;nucleotide binding;FMN binding;iron ion binding;small molecule binding;catalytic …	5;4;7;1;2;3;3;4;3;4;4;5;3;6;4;4;7;3;2;3;6;5;5;5;3;4;7;3;4;4;	K00264	map00250;map00910;map01100;map01110;map01120;map01130;map01230;	Alanine, aspartate and glutamate metabolism;Nitrogen metabolism;Metabolic pathways;Biosynthesis of secondary metabolites;Microbial metabolism in diverse environments;Biosynthesis of antibiotics;Biosynthesis of amino acids;	IPR002932;IPR013785;IPR028261;IPR002489;IPR006005;IPR023753;IPR009051;IPR006982;	Glutamate synthase domain;Aldolase-type TIM barrel;Dihydroprymidine dehydrogenase domain II;Glutamate synthase, alpha subunit, C-terminal;Glutamate synthase, NADH/NADPH, small subunit 1;FAD/NAD(P)-binding domain;Alpha-helical ferredoxin;Glutamate synthase, central-N;	cytosol	SPAPB1E7.07	2115	E	[E] Amino acid transport and metabolism;
T5AM98	V-type proton ATPase subunit a OS=Ophiocordyceps sinensis (strain Co18 / CGMCC 3.14243) OX=911162 GN=OCS_01414 PE=3 SV=1	up	1.529	1.357	1.847	1.664	0.881	0.94	0.728	0.861	0.763	0.842	0.825	0.677	1.87596	0.000577783	1.09752	0.241418	2.0589	0.000299473	GO:0009167;GO:0009165;GO:0044281;GO:0009161;GO:0098771;GO:1901362;GO:0042451;GO:0071840;GO:0044710;GO:0044711;GO:0009199;GO:0098662;GO:0019725;GO:0009206;GO:0009205;GO:0045851;GO:0009201;GO:0046034;GO:0046129;GO:0046128;GO:0042455;GO:0046483;GO:1901564;GO:1901566;GO:0048878;GO:0006163;GO:0006164;GO:0019637;GO:0019438;GO:0009163;GO:0022607;GO:0009141;GO:0009142;GO:0009144;GO:0009145;GO:0006807;GO:…	purine ribonucleoside monophosphate metabolic process;nucleotide biosynthetic process;small molecule metabolic process;ribonucleoside monophosphate metabolic process;inorganic ion homeostasis;organic cyclic compound biosynthetic process;purine nucleoside biosynthetic process;cellular component organization or biogenesis;single-organism metabolic process;single-organism biosynthetic process;ribonu…	8;6;4;7;7;5;7;2;3;4;7;7;4;8;8;10;7;8;8;7;7;4;4;5;5;6;7;4;5;6;4;6;6;7;7;3;11;4;6;6;9;3;6;5;2;2;6;3;5;5;7;5;4;8;7;7;1;2;5;3;5;8;9;5;6;3;5;3;6;5;9;8;4;7;6;4;4;10;6;7;7;6;4;6;7;2;4;6;8;7;7;5;4;4;8;7;9;12;5;4;4;8;4;5;6;5;6;9;5;4;5;3;8;5;5;4;6;5;6;6;2;3;3;3;4;5;3;4;6;5;	GO:0005783;GO:0031224;GO:0005773;GO:0016021;GO:0016020;GO:0098852;GO:0005774;GO:0044437;GO:0098588;GO:0000329;GO:0043234;GO:0043231;GO:0044422;GO:0033177;GO:0043229;GO:0043227;GO:0043226;GO:0016471;GO:0012505;GO:0044425;GO:0044446;GO:0033179;GO:0044444;GO:0033176;GO:0000324;GO:0000323;GO:0000322;GO:0016469;GO:0044424;GO:0005737;GO:0031090;GO:0044464;GO:0000220;GO:0005623;GO:0005622;GO:0098796;GO:…	endoplasmic reticulum;intrinsic component of membrane;vacuole;integral component of membrane;membrane;lytic vacuole membrane;vacuolar membrane;vacuolar part;bounding membrane of organelle;fungal-type vacuole membrane;protein complex;intracellular membrane-bounded organelle;organelle part;proton-transporting two-sector ATPase complex, proton-transporting domain;intracellular organelle;membrane-bou…	4;3;5;4;2;5;4;4;4;6;3;4;2;4;3;3;2;5;3;2;3;5;4;5;7;6;6;4;3;4;3;2;5;2;3;3;2;1;3;	GO:0022857;GO:0036442;GO:0032549;GO:0046961;GO:0016818;GO:0097367;GO:0030554;GO:0016817;GO:0005524;GO:0015405;GO:0003674;GO:0005488;GO:0016887;GO:0019829;GO:1901265;GO:0042626;GO:0015399;GO:0017076;GO:0022804;GO:0016787;GO:0022890;GO:0016462;GO:0003824;GO:0097159;GO:0043492;GO:0032559;GO:0032555;GO:0015078;GO:0019899;GO:0000166;GO:0016820;GO:0035639;GO:0043167;GO:0044769;GO:0022891;GO:0005215;GO:…	transmembrane transporter activity;hydrogen-exporting ATPase activity;ribonucleoside binding;proton-transporting ATPase activity, rotational mechanism;hydrolase activity, acting on acid anhydrides, in phosphorus-containing anhydrides;carbohydrate derivative binding;adenyl nucleotide binding;hydrolase activity, acting on acid anhydrides;ATP binding;P-P-bond-hydrolysis-driven transmembrane transpor…	3;8;5;8;5;3;6;4;6;6;1;2;8;7;4;6;5;5;4;3;7;6;2;3;10;6;5;9;4;4;5;5;3;7;4;2;3;6;3;3;4;5;8;5;5;6;6;7;3;9;4;4;5;	K02154	map00190;map01100;map04142;map04145;map04721;map04966;map05110;map05120;map05152;map05323;	Oxidative phosphorylation;Metabolic pathways;Lysosome;Phagosome;Synaptic vesicle cycle;Collecting duct acid secretion;Vibrio cholerae infection;Epithelial cell signaling in Helicobacter pylori infection;Tuberculosis;Rheumatoid arthritis;	IPR002490;IPR026028;	V-type ATPase, V0 complex, 116kDa subunit family;ATPase, V0 complex, subunit 116kDa, eukaryotic;	plasma membrane	YOR270c	803	C	[C] Energy production and conversion;
T5A9X1	Glucose-6-phosphate isomerase OS=Ophiocordyceps sinensis (strain Co18 / CGMCC 3.14243) OX=911162 GN=OCS_05683 PE=3 SV=1	up	1.642	1.416	1.574	1.24	0.88	0.735	0.728	0.788	0.855	0.807	0.79	0.778	1.87543	0.000384327	0.96935	0.5485	1.81796	0.000350184	GO:0009167;GO:0044281;GO:0009161;GO:0044712;GO:0044710;GO:0044711;GO:0009199;GO:0006733;GO:0009205;GO:0046034;GO:0046031;GO:0032787;GO:0043436;GO:0046128;GO:0009179;GO:0046483;GO:1901564;GO:0016052;GO:0016051;GO:0006163;GO:0006165;GO:0019637;GO:0009141;GO:0044283;GO:0009144;GO:0006807;GO:0046496;GO:1901576;GO:1901575;GO:0051186;GO:1901360;GO:0019318;GO:0019319;GO:0009150;GO:0008150;GO:0008152;GO:…	purine ribonucleoside monophosphate metabolic process;small molecule metabolic process;ribonucleoside monophosphate metabolic process;single-organism catabolic process;single-organism metabolic process;single-organism biosynthetic process;ribonucleoside triphosphate metabolic process;oxidoreduction coenzyme metabolic process;purine ribonucleoside triphosphate metabolic process;ATP metabolic proce…	8;4;7;4;3;4;7;6;8;8;8;7;5;7;8;4;4;5;5;6;7;4;6;5;7;3;7;4;4;4;4;6;7;7;1;2;4;5;6;5;5;5;6;4;6;7;6;2;4;6;7;2;4;6;7;4;4;5;4;7;7;6;6;5;5;4;8;5;6;8;3;3;3;5;6;3;3;4;3;4;5;4;6;	GO:0044424;GO:0005737;GO:0044464;GO:0005623;GO:0005622;GO:0005575;	intracellular part;cytoplasm;cell part;cell;intracellular;cellular_component;	3;4;2;2;3;1;	GO:0016861;GO:0016860;GO:0003674;GO:0003824;GO:0016853;GO:0004347;	intramolecular oxidoreductase activity, interconverting aldoses and ketoses;intramolecular oxidoreductase activity;molecular_function;catalytic activity;isomerase activity;glucose-6-phosphate isomerase activity;	5;4;1;2;3;6;	K01810	map00010;map00030;map00500;map00520;map01100;map01110;map01120;map01130;map01200;	Glycolysis / Gluconeogenesis;Pentose phosphate pathway;Starch and sucrose metabolism;Amino sugar and nucleotide sugar metabolism;Metabolic pathways;Biosynthesis of secondary metabolites;Microbial metabolism in diverse environments;Biosynthesis of antibiotics;Carbon metabolism;	IPR035482;IPR023096;IPR018189;IPR001672;IPR035476;	Phosphoglucose isomerase, SIS domain 2;Phosphoglucose isomerase, C-terminal;Phosphoglucose isomerase, conserved site;Phosphoglucose isomerase (PGI);Phosphoglucose isomerase, SIS domain 1;	cytosol	YBR196c	754	G	[G] Carbohydrate transport and metabolism;
T5AL96	Catalase OS=Ophiocordyceps sinensis (strain Co18 / CGMCC 3.14243) OX=911162 GN=OCS_00915 PE=3 SV=1	up	1.554	1.089	1.311	1.29	0.669	0.728	0.637	0.763	1.512	1.175	1.014	0.902	1.87487	0.000841725	0.60765	0.0159174	1.13926	0.364636	GO:0044237;GO:0000302;GO:0044248;GO:0042744;GO:0098754;GO:0044699;GO:0044710;GO:0009636;GO:0098869;GO:0044712;GO:0009987;GO:0072593;GO:0006950;GO:0008150;GO:0008152;GO:0042221;GO:0010035;GO:0009056;GO:0006979;GO:1901700;GO:0042743;GO:0042542;GO:1990748;GO:0044763;GO:0050896;	cellular metabolic process;response to reactive oxygen species;cellular catabolic process;hydrogen peroxide catabolic process;detoxification;single-organism process;single-organism metabolic process;response to toxic substance;cellular oxidant detoxification;single-organism catabolic process;cellular process;reactive oxygen species metabolic process;response to stress;biological_process;metabolic…	3;5;4;4;2;2;3;4;4;4;2;4;3;1;2;3;4;3;4;4;5;5;3;3;2;	GO:0005737;GO:0005829;GO:0044464;GO:0005623;GO:0005622;GO:0005575;GO:0044444;GO:0044424;	cytoplasm;cytosol;cell part;cell;intracellular;cellular_component;cytoplasmic part;intracellular part;	4;5;2;2;3;1;4;3;	GO:0003674;GO:0005488;GO:1901363;GO:0016491;GO:0043169;GO:0043167;GO:0016684;GO:0004601;GO:0020037;GO:0016209;GO:0003824;GO:0046872;GO:0046906;GO:0097159;GO:0004096;	molecular_function;binding;heterocyclic compound binding;oxidoreductase activity;cation binding;ion binding;oxidoreductase activity, acting on peroxide as acceptor;peroxidase activity;heme binding;antioxidant activity;catalytic activity;metal ion binding;tetrapyrrole binding;organic cyclic compound binding;catalase activity;	1;2;3;3;4;3;4;3;5;2;2;5;4;3;4;	K03781	map00380;map00630;map01110;map01130;map01200;map04011;map04068;map04146;map04211;map04212;map04213;map05014;	Tryptophan metabolism;Glyoxylate and dicarboxylate metabolism;Biosynthesis of secondary metabolites;Biosynthesis of antibiotics;Carbon metabolism;MAPK signaling pathway - yeast;FoxO signaling pathway;Peroxisome;Longevity regulating pathway;Longevity regulating pathway - worm;Longevity regulating pathway - multiple species;Amyotrophic lateral sclerosis (ALS);	IPR002226;IPR024712;IPR029062;IPR024708;IPR018028;IPR010582;IPR020835;IPR011614;	Catalase haem-binding site;Catalase, mono-functional, haem-containing, clade 2;Class I glutamine amidotransferase-like;Catalase active site;Catalase, mono-functional, haem-containing;Catalase immune-responsive domain;Catalase-like domain;Catalase core domain;	extracellular	291302759	610	P	[P] Inorganic ion transport and metabolism;	COG0753	Catalase
T5AGK8	HMG box protein OS=Ophiocordyceps sinensis (strain Co18 / CGMCC 3.14243) OX=911162 GN=OCS_02580 PE=4 SV=1	up	1.588	1.227	2.023	1.097	0.824	0.886	0.705	0.754	0.839	0.853	0.539	0.84	1.87283	0.0169955	1.03191	0.785324	1.9326	0.0177495	GO:0080090;GO:0019222;GO:0031326;GO:0031323;GO:0090304;GO:0044249;GO:0034641;GO:0006807;GO:0034645;GO:1901576;GO:1901362;GO:0050789;GO:0044699;GO:0032774;GO:0006139;GO:0051716;GO:0044260;GO:2000112;GO:0097659;GO:0071704;GO:0010467;GO:0065007;GO:1901360;GO:0010468;GO:0018130;GO:0006281;GO:0019219;GO:0009889;GO:0009987;GO:0006725;GO:0044710;GO:1903506;GO:0050794;GO:0006974;GO:0006950;GO:0009059;GO:…	regulation of primary metabolic process;regulation of metabolic process;regulation of cellular biosynthetic process;regulation of cellular metabolic process;nucleic acid metabolic process;cellular biosynthetic process;cellular nitrogen compound metabolic process;nitrogen compound metabolic process;cellular macromolecule biosynthetic process;organic substance biosynthetic process;organic cyclic co…	4;3;5;4;5;4;4;3;5;4;5;2;2;6;4;3;4;6;7;3;5;2;4;5;5;4;5;4;2;4;3;7;3;5;3;5;1;4;2;6;5;4;5;3;5;5;4;2;5;3;3;4;6;5;6;4;5;3;	GO:0005623;GO:0043228;GO:0005622;GO:0005737;GO:0043227;GO:0005634;GO:0005694;GO:0043226;GO:0043229;GO:0044424;GO:0043231;GO:0043232;GO:0044464;GO:0005575;GO:0044444;GO:0005829;	cell;non-membrane-bounded organelle;intracellular;cytoplasm;membrane-bounded organelle;nucleus;chromosome;organelle;intracellular organelle;intracellular part;intracellular membrane-bounded organelle;intracellular non-membrane-bounded organelle;cell part;cellular_component;cytoplasmic part;cytosol;	2;3;3;4;3;5;5;2;3;3;4;4;2;1;4;5;	GO:0003674;GO:0003677;GO:1901363;GO:0003676;GO:0097159;GO:0005488;	molecular_function;DNA binding;heterocyclic compound binding;nucleic acid binding;organic cyclic compound binding;binding;	1;5;3;4;3;2;				IPR009071;	High mobility group box domain;	nucleus	YBR089c-a	121	R	[R] General function prediction only;
T5A7B3	26S proteasome regulatory subunit RPN2 OS=Ophiocordyceps sinensis (strain Co18 / CGMCC 3.14243) OX=911162 GN=OCS_06605 PE=3 SV=1	up	1.487	1.743	1.553	1.136	0.818	0.709	0.778	0.863	0.872	0.711	0.806	0.843	1.86836	0.00191397	0.9802	0.749737	1.83137	0.00220615	GO:0032436;GO:0080090;GO:0019222;GO:0010965;GO:0071840;GO:0032434;GO:0051246;GO:0048518;GO:0007088;GO:0060255;GO:0030162;GO:0030163;GO:1902099;GO:1903364;GO:0019538;GO:0010638;GO:0051783;GO:0051781;GO:0051785;GO:0044784;GO:0009896;GO:0045840;GO:0009894;GO:0045842;GO:0009893;GO:0007067;GO:0030071;GO:0044267;GO:0007346;GO:0044265;GO:0044260;GO:0016043;GO:0065007;GO:0044699;GO:1901800;GO:0051130;GO:…	positive regulation of proteasomal ubiquitin-dependent protein catabolic process;regulation of primary metabolic process;regulation of metabolic process;regulation of mitotic sister chromatid separation;cellular component organization or biogenesis;regulation of proteasomal ubiquitin-dependent protein catabolic process;regulation of protein metabolic process;positive regulation of biological proc…	8;4;3;7;2;8;5;2;6;4;6;5;6;6;4;5;5;4;5;6;4;6;4;6;3;5;7;5;5;5;4;3;2;2;7;4;3;6;1;2;4;6;6;6;5;8;5;6;6;5;6;5;5;4;4;5;6;6;4;7;6;5;5;5;7;5;7;2;7;6;4;4;5;5;5;4;6;5;4;4;4;5;5;6;4;6;6;5;4;4;2;3;5;5;6;5;7;4;3;3;5;4;3;6;5;4;4;3;4;5;7;6;3;	GO:0005838;GO:0000502;GO:0043234;GO:0043231;GO:0005829;GO:0044424;GO:0043229;GO:0005622;GO:0043227;GO:0044444;GO:0008540;GO:0005737;GO:0005634;GO:0043226;GO:0044464;GO:0005623;GO:0022624;GO:0032991;GO:0005575;	proteasome regulatory particle;proteasome complex;protein complex;intracellular membrane-bounded organelle;cytosol;intracellular part;intracellular organelle;intracellular;membrane-bounded organelle;cytoplasmic part;proteasome regulatory particle, base subcomplex;cytoplasm;nucleus;organelle;cell part;cell;proteasome accessory complex;macromolecular complex;cellular_component;	4;4;3;4;5;3;3;3;3;4;4;4;5;2;2;2;4;2;1;	GO:0098772;GO:0003674;GO:0030234;	molecular function regulator;molecular_function;enzyme regulator activity;	2;1;3;	K03032	map03050;map05169;	Proteasome;Epstein-Barr virus infection;	IPR016642;IPR002015;IPR016024;IPR035266;IPR011989;	26S proteasome regulatory complex, non-ATPase subcomplex, Rpn2/Psmd1 subunit;Proteasome/cyclosome repeat;Armadillo-type fold;26S Proteasome non-ATPase regulatory subunit 1;Armadillo-like helical;	cytosol	SPBC17D11.07c	766	O	[O] Posttranslational modification, protein turnover, chaperones;
T5A413	L-threonine 3-dehydrogenase OS=Ophiocordyceps sinensis (strain Co18 / CGMCC 3.14243) OX=911162 GN=OCS_06954 PE=4 SV=1	up	1.838	1.368	1.439	1.138	0.944	0.711	0.711	0.736	1.057	1.027	0.951	1.14	1.86428	0.00514967	0.74299	0.00792838	1.38515	0.0372588	GO:0044699;GO:0044710;GO:0071704;GO:0008150;GO:0008152;GO:0005975;GO:0055114;GO:0051704;GO:0044238;GO:0009405;	single-organism process;single-organism metabolic process;organic substance metabolic process;biological_process;metabolic process;carbohydrate metabolic process;oxidation-reduction process;multi-organism process;primary metabolic process;pathogenesis;	2;3;3;1;2;4;4;2;3;3;	GO:0042995;GO:0044464;GO:0005623;GO:0005575;	cell projection;cell part;cell;cellular_component;	3;2;2;1;	GO:0003674;GO:0008270;GO:0016491;GO:0043169;GO:0046914;GO:0052677;GO:0043167;GO:0033709;GO:0046872;GO:0003824;GO:0016614;GO:0016616;GO:0005488;	molecular_function;zinc ion binding;oxidoreductase activity;cation binding;transition metal ion binding;D-arabinitol dehydrogenase, D-xylulose forming (NADP+) activity;ion binding;D-arabinitol dehydrogenase, D-ribulose forming (NADP+) activity;metal ion binding;catalytic activity;oxidoreductase activity, acting on CH-OH group of donors;oxidoreductase activity, acting on the CH-OH group of donors,…	1;7;3;4;6;6;3;6;5;2;4;5;2;	K17818	map00040;map01100;	Pentose and glucuronate interconversions;Metabolic pathways;	IPR013149;IPR016040;	Alcohol dehydrogenase, C-terminal;NAD(P)-binding domain;	cytosol	269839298	88.6	ER	[E] Amino acid transport and metabolism; [R] General function prediction only;	COG1063	Threonine dehydrogenase or related Zn-dependent dehydrogenase
T5AG48	Polyadenylate-binding protein OS=Ophiocordyceps sinensis (strain Co18 / CGMCC 3.14243) OX=911162 GN=OCS_03584 PE=3 SV=1	up	1.721	1.489	1.76	1.149	0.809	0.824	0.821	0.831	0.792	0.792	0.857	0.85	1.86272	0.00234046	0.99818	0.937654	1.85931	0.00245494	GO:0015931;GO:0044238;GO:0080090;GO:0019222;GO:0051246;GO:0031326;GO:0043603;GO:0006139;GO:0050657;GO:0090304;GO:0044249;GO:0006807;GO:0051236;GO:0006725;GO:0051028;GO:0043170;GO:0044267;GO:0051234;GO:0044260;GO:0050789;GO:0010608;GO:0016071;GO:0043043;GO:0006403;GO:0071705;GO:0071704;GO:0010467;GO:0065007;GO:1901360;GO:0071702;GO:2000112;GO:0010468;GO:0006810;GO:0009058;GO:1901576;GO:0060255;GO:…	nucleobase-containing compound transport;primary metabolic process;regulation of primary metabolic process;regulation of metabolic process;regulation of protein metabolic process;regulation of cellular biosynthetic process;cellular amide metabolic process;nucleobase-containing compound metabolic process;nucleic acid transport;nucleic acid metabolic process;cellular biosynthetic process;nitrogen c…	6;3;4;3;5;5;5;4;7;5;4;3;4;4;6;4;5;3;4;2;6;6;6;4;5;3;5;2;4;5;6;5;4;3;4;4;4;2;4;3;6;5;5;1;4;2;2;5;5;5;4;5;6;5;5;4;5;4;3;4;5;3;6;6;7;	GO:0043229;GO:0043227;GO:0043226;GO:0005737;GO:0005634;GO:0043231;GO:0044464;GO:0005623;GO:0005622;GO:0005575;GO:0044424;	intracellular organelle;membrane-bounded organelle;organelle;cytoplasm;nucleus;intracellular membrane-bounded organelle;cell part;cell;intracellular;cellular_component;intracellular part;	3;3;2;4;5;4;2;2;3;1;3;	GO:1901363;GO:0003674;GO:0005488;GO:0003676;GO:1901265;GO:0000166;GO:0036094;GO:0097159;GO:0003723;	heterocyclic compound binding;molecular_function;binding;nucleic acid binding;nucleoside phosphate binding;nucleotide binding;small molecule binding;organic cyclic compound binding;RNA binding;	3;1;2;4;4;4;3;3;5;	K13126	map03013;map03015;map03018;	RNA transport;mRNA surveillance pathway;RNA degradation;	IPR000504;IPR002004;IPR003954;IPR006515;	RNA recognition motif domain;Polyadenylate-binding protein/Hyperplastic disc protein;RNA recognition motif domain, eukaryote;Polyadenylate binding protein, human types 1, 2, 3, 4;	nucleus	SPAC57A7.04c	673	AJ	[A] RNA processing and modification;[J] Translation, ribosomal structure and biogenesis;
T5AAX6	Cas/cse OS=Ophiocordyceps sinensis (strain Co18 / CGMCC 3.14243) OX=911162 GN=OCS_05387 PE=4 SV=1	up	1.808	1.669	1.579	1.6	0.81	0.955	0.929	0.881	0.813	0.835	1.065	0.756	1.86182	1.47241e-05	1.03056	0.736174	1.91871	8.59935e-05	GO:0051169;GO:0051168;GO:0006611;GO:1903047;GO:0008104;GO:0051301;GO:0071840;GO:0044699;GO:0070727;GO:0006886;GO:0000280;GO:0016043;GO:0007049;GO:0071702;GO:0033036;GO:0006810;GO:0000278;GO:0007067;GO:0034613;GO:0006913;GO:0045184;GO:0015031;GO:0044765;GO:0008150;GO:0051649;GO:0051234;GO:0051179;GO:1902578;GO:0051641;GO:0006996;GO:0046907;GO:0022402;GO:0044763;GO:1902589;GO:0048285;GO:1902582;GO:…	nuclear transport;nuclear export;protein export from nucleus;mitotic cell cycle process;protein localization;cell division;cellular component organization or biogenesis;single-organism process;cellular macromolecule localization;intracellular protein transport;nuclear division;cellular component organization;cell cycle;organic substance transport;macromolecule localization;transport;mitotic cell …	6;8;6;5;4;4;2;2;4;6;6;3;4;5;3;4;5;5;5;7;4;5;4;1;4;3;2;3;3;4;5;4;3;4;5;5;2;	GO:0031975;GO:0043229;GO:0043227;GO:0043226;GO:0005737;GO:0044446;GO:0005635;GO:0031967;GO:0012505;GO:0043231;GO:0044464;GO:0005623;GO:0005622;GO:0005575;GO:0044428;GO:0044424;GO:0005634;GO:0044422;	envelope;intracellular organelle;membrane-bounded organelle;organelle;cytoplasm;intracellular organelle part;nuclear envelope;organelle envelope;endomembrane system;intracellular membrane-bounded organelle;cell part;cell;intracellular;cellular_component;nuclear part;intracellular part;nucleus;organelle part;	3;3;3;2;4;3;4;4;3;4;2;2;3;1;4;3;5;2;	GO:0003674;GO:0005487;GO:0008565;GO:0005215;GO:0022892;GO:0005049;	molecular_function;nucleocytoplasmic transporter activity;protein transporter activity;transporter activity;substrate-specific transporter activity;nuclear export signal receptor activity;	1;3;4;2;3;4;	K18423			IPR013713;IPR001494;IPR016024;IPR011989;IPR005043;	Exportin/Importin, Cse1-like;Importin-beta, N-terminal domain;Armadillo-type fold;Armadillo-like helical;CAS/CSE, C-terminal;	cytosol	YGL238w	680	YU	[Y] Nuclear structure;[U] Intracellular trafficking, secretion, and vesicular transport;
T5AFN2	40s ribosomal protein OS=Ophiocordyceps sinensis (strain Co18 / CGMCC 3.14243) OX=911162 GN=OCS_03726 PE=3 SV=1	up	1.893	1.359	1.419	1.473	0.796	0.818	0.87	0.818	0.842	0.813	0.726	0.761	1.86071	0.00114023	1.05092	0.235572	1.95544	0.000921627	GO:0044249;GO:0034641;GO:0006807;GO:0034645;GO:1901576;GO:0044260;GO:0043043;GO:0071704;GO:0010467;GO:0002181;GO:0044267;GO:0009987;GO:0009058;GO:0009059;GO:0008150;GO:0008152;GO:0044271;GO:0043604;GO:0044238;GO:1901564;GO:0043603;GO:1901566;GO:0019538;GO:0044237;GO:0043170;GO:0006518;GO:0006412;	cellular biosynthetic process;cellular nitrogen compound metabolic process;nitrogen compound metabolic process;cellular macromolecule biosynthetic process;organic substance biosynthetic process;cellular macromolecule metabolic process;peptide biosynthetic process;organic substance metabolic process;gene expression;cytoplasmic translation;cellular protein metabolic process;cellular process;biosynt…	4;4;3;5;4;4;6;3;5;7;5;2;3;5;1;2;5;6;3;4;5;5;4;3;4;5;6;	GO:0022626;GO:0015935;GO:1990904;GO:0043232;GO:0005623;GO:0005622;GO:0043226;GO:0022627;GO:0005737;GO:0044445;GO:0032991;GO:0030529;GO:0044446;GO:0044391;GO:0005840;GO:0005829;GO:0044464;GO:0043229;GO:0005575;GO:0044444;GO:0043228;GO:0044424;GO:0044422;	cytosolic ribosome;small ribosomal subunit;ribonucleoprotein complex;intracellular non-membrane-bounded organelle;cell;intracellular;organelle;cytosolic small ribosomal subunit;cytoplasm;cytosolic part;macromolecular complex;intracellular ribonucleoprotein complex;intracellular organelle part;ribosomal subunit;ribosome;cytosol;cell part;intracellular organelle;cellular_component;cytoplasmic part;…	6;5;3;4;2;3;2;6;4;5;2;4;3;4;5;5;2;3;1;4;3;3;2;	GO:1901363;GO:0003674;GO:0005198;GO:0003735;GO:0003676;GO:0003723;GO:0097159;GO:0005488;	heterocyclic compound binding;molecular_function;structural molecule activity;structural constituent of ribosome;nucleic acid binding;RNA binding;organic cyclic compound binding;binding;	3;1;2;3;4;5;3;2;	K02985	map03010;	Ribosome;	IPR005703;IPR015946;IPR001351;IPR018280;IPR004044;IPR009019;	Ribosomal protein S3, eukaryotic/archaeal;K homology domain-like, alpha/beta;Ribosomal protein S3, C-terminal;Ribosomal protein S3, conserved site;K Homology domain, type 2;K homology domain, prokaryotic type;	mitochondria	SPBC16G5.14c	363	J	[J] Translation, ribosomal structure and biogenesis;
T5ACE9	WSC domain containing protein OS=Ophiocordyceps sinensis (strain Co18 / CGMCC 3.14243) OX=911162 GN=OCS_04190 PE=3 SV=1	up	1.889	1.56	1.527	1.428	0.762	0.815	0.818	1.049	0.822	0.791	1.111	0.806	1.85946	0.000789022	0.97564	0.836357	1.81416	0.00125092	GO:0050896;GO:0006950;GO:0006979;GO:0008150;	response to stimulus;response to stress;response to oxidative stress;biological_process;	2;3;4;1;	GO:0005575;GO:0005576;	cellular_component;extracellular region;	1;2;	GO:0020037;GO:0046906;GO:0097159;GO:0016209;GO:1901363;GO:0003824;GO:0003674;GO:0005488;GO:0016684;GO:0004601;GO:0016491;	heme binding;tetrapyrrole binding;organic cyclic compound binding;antioxidant activity;heterocyclic compound binding;catalytic activity;molecular_function;binding;oxidoreductase activity, acting on peroxide as acceptor;peroxidase activity;oxidoreductase activity;	5;4;3;2;3;2;1;2;4;3;3;				IPR002889;IPR010255;IPR002207;IPR002016;	Carbohydrate-binding WSC;Haem peroxidase;Plant ascorbate peroxidase;Haem peroxidase, plant/fungal/bacterial;	extracellular	At4g35970	83.6	R	[R] General function prediction only;
T5A6G9	S-adenosylmethionine synthase OS=Ophiocordyceps sinensis (strain Co18 / CGMCC 3.14243) OX=911162 GN=OCS_06119 PE=3 SV=1	up	1.223	1.56	1.676	1.306	0.776	0.744	0.766	0.823	0.781	0.676	0.637	0.69	1.85429	0.000824441	1.11674	0.0578513	2.07076	0.000515493	GO:0044281;GO:1901362;GO:0042451;GO:1901360;GO:0044710;GO:0044711;GO:0046500;GO:0000096;GO:0043436;GO:0046129;GO:0046128;GO:0042455;GO:0046483;GO:1901564;GO:1901566;GO:0019438;GO:0009163;GO:0042398;GO:0006807;GO:1901576;GO:0051186;GO:0051188;GO:0018130;GO:0006139;GO:0008150;GO:0008152;GO:0034654;GO:0006575;GO:0044271;GO:0044272;GO:0006732;GO:0006730;GO:0044249;GO:0034641;GO:0044699;GO:0042278;GO:…	small molecule metabolic process;organic cyclic compound biosynthetic process;purine nucleoside biosynthetic process;organic cyclic compound metabolic process;single-organism metabolic process;single-organism biosynthetic process;S-adenosylmethionine metabolic process;sulfur amino acid metabolic process;oxoacid metabolic process;purine ribonucleoside biosynthetic process;purine ribonucleoside met…	4;5;7;4;3;4;5;5;5;8;7;7;4;4;5;5;6;5;3;4;4;5;5;4;1;2;5;4;5;5;5;4;4;4;2;6;5;2;4;4;4;5;4;6;6;6;5;6;4;3;3;3;5;6;3;6;6;3;4;4;5;	GO:0043231;GO:0005829;GO:0044424;GO:0043229;GO:0043227;GO:0043226;GO:0044444;GO:0005737;GO:0005634;GO:0044464;GO:0005623;GO:0005622;GO:0005575;	intracellular membrane-bounded organelle;cytosol;intracellular part;intracellular organelle;membrane-bounded organelle;organelle;cytoplasmic part;cytoplasm;nucleus;cell part;cell;intracellular;cellular_component;	4;5;3;3;3;2;4;4;5;2;2;3;1;	GO:0000166;GO:0035639;GO:0016740;GO:0046872;GO:0097367;GO:0003674;GO:0005488;GO:1901265;GO:1901363;GO:0016765;GO:0032549;GO:0017076;GO:0005524;GO:0043168;GO:0003824;GO:0097159;GO:0032559;GO:0032555;GO:0032550;GO:0032553;GO:0043169;GO:0043167;GO:0030554;GO:0001883;GO:0001882;GO:0036094;GO:0004478;	nucleotide binding;purine ribonucleoside triphosphate binding;transferase activity;metal ion binding;carbohydrate derivative binding;molecular_function;binding;nucleoside phosphate binding;heterocyclic compound binding;transferase activity, transferring alkyl or aryl (other than methyl) groups;ribonucleoside binding;purine nucleotide binding;ATP binding;anion binding;catalytic activity;organic cy…	4;5;3;5;3;1;2;4;3;4;5;5;6;4;2;3;6;5;6;4;4;3;6;5;4;3;5;	K00789	map00270;map01100;map01110;map01230;	Cysteine and methionine metabolism;Metabolic pathways;Biosynthesis of secondary metabolites;Biosynthesis of amino acids;	IPR022636;IPR022631;IPR022630;IPR022628;IPR022629;IPR002133;	S-adenosylmethionine synthetase superfamily;S-adenosylmethionine synthetase, conserved site;S-adenosylmethionine synthetase, C-terminal;S-adenosylmethionine synthetase, N-terminal;S-adenosylmethionine synthetase, central domain;S-adenosylmethionine synthetase;	cytosol	SPBC14F5.05c	614	H	[H] Coenzyme transport and metabolism;
T5AAS5	Peroxiredoxin OS=Ophiocordyceps sinensis (strain Co18 / CGMCC 3.14243) OX=911162 GN=OCS_01708 PE=3 SV=1	up	1.478	1.374	1.06	1.214	0.864	0.596	0.721	0.587	0.711	0.943	0.616	0.647	1.85189	0.00192481	0.94892	0.718151	1.75728	0.0033617				GO:0042579;GO:0043229;GO:0043227;GO:0043226;GO:0005737;GO:0005777;GO:0005622;GO:0043231;GO:0044464;GO:0005623;GO:0005575;GO:0044444;GO:0044424;	microbody;intracellular organelle;membrane-bounded organelle;organelle;cytoplasm;peroxisome;intracellular;intracellular membrane-bounded organelle;cell part;cell;cellular_component;cytoplasmic part;intracellular part;	5;3;3;2;4;6;3;4;2;2;1;4;3;	GO:0003674;GO:0005488;GO:0051920;GO:0016491;GO:0032403;GO:0016684;GO:0016209;GO:0003824;GO:0019863;GO:0019865;GO:0005515;GO:0044877;GO:0004601;	molecular_function;binding;peroxiredoxin activity;oxidoreductase activity;protein complex binding;oxidoreductase activity, acting on peroxide as acceptor;antioxidant activity;catalytic activity;IgE binding;immunoglobulin binding;protein binding;macromolecular complex binding;peroxidase activity;	1;2;3;3;4;4;2;2;6;5;3;3;3;	K14171	map04122;	Sulfur relay system;	IPR013766;IPR013740;IPR012336;	Thioredoxin domain;Redoxin;Thioredoxin-like fold;	cytosol	YLR109w	101	O	[O] Posttranslational modification, protein turnover, chaperones;
T5AKV2	Uncharacterized protein OS=Ophiocordyceps sinensis (strain Co18 / CGMCC 3.14243) OX=911162 GN=OCS_01237 PE=4 SV=1	up	1.719	1.261	1.545	1.199	0.672	0.761	0.838	0.845	0.91	1.08	0.943	0.952	1.83699	0.00228279	0.80206	0.0129404	1.47336	0.0113286															cytosol
T5AJS1	40S ribosomal protein S7 OS=Ophiocordyceps sinensis (strain Co18 / CGMCC 3.14243) OX=911162 GN=OCS_01421 PE=3 SV=1	up	1.33	1.105	1.866	1.483	0.868	0.694	0.728	0.867	0.852	1.007	0.673	0.693	1.83211	0.00758117	0.97891	0.857019	1.79349	0.0114651	GO:1901566;GO:0043603;GO:0090304;GO:0044249;GO:0044237;GO:0034645;GO:0034660;GO:0071840;GO:1901564;GO:0042274;GO:0043043;GO:0042254;GO:0043604;GO:0071704;GO:0010467;GO:0044085;GO:1901360;GO:0022613;GO:0044267;GO:0046483;GO:0006364;GO:0043170;GO:0034470;GO:0006139;GO:0044260;GO:0009987;GO:0006725;GO:0006807;GO:0009058;GO:0009059;GO:0008150;GO:0008152;GO:0044271;GO:0016070;GO:0044238;GO:0016072;GO:…	organonitrogen compound biosynthetic process;cellular amide metabolic process;nucleic acid metabolic process;cellular biosynthetic process;cellular metabolic process;cellular macromolecule biosynthetic process;ncRNA metabolic process;cellular component organization or biogenesis;organonitrogen compound metabolic process;ribosomal small subunit biogenesis;peptide biosynthetic process;ribosome biog…	5;5;5;4;3;5;6;2;4;5;6;5;6;3;5;3;4;4;5;4;6;4;7;4;4;2;4;3;3;5;1;2;5;5;3;7;4;4;6;4;5;6;	GO:0032040;GO:0022626;GO:0022627;GO:1990904;GO:0030686;GO:0031974;GO:0030684;GO:0043229;GO:0043228;GO:0043227;GO:0043226;GO:0015935;GO:0005737;GO:0005575;GO:0031981;GO:0005634;GO:0030529;GO:0044391;GO:0043231;GO:0032991;GO:0005840;GO:0043232;GO:0043233;GO:0005829;GO:0005730;GO:0044464;GO:0005623;GO:0005622;GO:0044446;GO:0070013;GO:0044444;GO:0044445;GO:0044428;GO:0044424;GO:0044422;	small-subunit processome;cytosolic ribosome;cytosolic small ribosomal subunit;ribonucleoprotein complex;90S preribosome;membrane-enclosed lumen;preribosome;intracellular organelle;non-membrane-bounded organelle;membrane-bounded organelle;organelle;small ribosomal subunit;cytoplasm;cellular_component;nuclear lumen;nucleus;intracellular ribonucleoprotein complex;ribosomal subunit;intracellular memb…	6;6;6;3;6;2;5;3;3;3;2;5;4;1;5;5;4;4;4;2;5;4;3;5;5;2;2;3;3;4;4;5;4;3;2;	GO:0003674;GO:0005198;GO:0003735;	molecular_function;structural molecule activity;structural constituent of ribosome;	1;2;3;	K02993	map03010;	Ribosome;	IPR000554;	Ribosomal protein S7e;	nucleus	SPAC18G6.14c	236	J	[J] Translation, ribosomal structure and biogenesis;
T5A9P7	Heterokaryon incompatibility protein Het-C OS=Ophiocordyceps sinensis (strain Co18 / CGMCC 3.14243) OX=911162 GN=OCS_05804 PE=4 SV=1	up	1.669	1.559	1.554	1.478	0.951	0.818	0.856	0.801	0.847	0.835	0.761	0.863	1.82722	9.34915e-06	1.0363	0.486019	1.89353	3.40398e-06													IPR010816;	Heterokaryon incompatibility Het-C;	extracellular
T5AG10	Nitrilase OS=Ophiocordyceps sinensis (strain Co18 / CGMCC 3.14243) OX=911162 GN=OCS_03621 PE=3 SV=1	up	2.144	1.691	1.551	0.829	0.893	0.865	0.655	0.991	1.003	1.135	1.379	1.15	1.82578	0.046883	0.72938	0.0240775	1.33169	0.221446	GO:0055085;GO:0008150;GO:0044699;GO:0006810;GO:0009987;GO:0044765;GO:0044763;GO:0051234;GO:0051179;GO:1902578;	transmembrane transport;biological_process;single-organism process;transport;cellular process;single-organism transport;single-organism cellular process;establishment of localization;localization;single-organism localization;	4;1;2;4;2;4;3;3;2;3;	GO:0044464;GO:0031975;GO:0043229;GO:0043227;GO:0043226;GO:0031224;GO:0005737;GO:0044446;GO:0031090;GO:0016021;GO:0016020;GO:0005740;GO:0005739;GO:0031967;GO:0031966;GO:0043231;GO:0019866;GO:0005623;GO:0005622;GO:0005575;GO:0005743;GO:0044444;GO:0044429;GO:0044424;GO:0044425;GO:0044422;	cell part;envelope;intracellular organelle;membrane-bounded organelle;organelle;intrinsic component of membrane;cytoplasm;intracellular organelle part;organelle membrane;integral component of membrane;membrane;mitochondrial envelope;mitochondrion;organelle envelope;mitochondrial membrane;intracellular membrane-bounded organelle;organelle inner membrane;cell;intracellular;cellular_component;mitoch…	2;3;3;3;2;3;4;3;3;4;2;5;5;4;4;4;4;2;3;1;5;4;4;3;2;2;				K15104			IPR002067;IPR018108;IPR023395;	Mitochondrial carrier protein;Mitochondrial substrate/solute carrier;Mitochondrial carrier domain;	mitochondria	At5g19760	265	C	[C] Energy production and conversion;
T5A999	Translation initiation factor 1A (EIF-1A) OS=Ophiocordyceps sinensis (strain Co18 / CGMCC 3.14243) OX=911162 GN=OCS_05294 PE=3 SV=1	up	2.121	1.429	1.661	1.038	0.68	0.881	0.932	0.93	0.702	0.831	0.686	0.88	1.82558	0.023443	1.10455	0.330549	2.01646	0.014411							GO:0097159;GO:0008135;GO:0003674;GO:0005488;GO:0003676;GO:0003743;GO:1901363;GO:0003723;	organic cyclic compound binding;translation factor activity, RNA binding;molecular_function;binding;nucleic acid binding;translation initiation factor activity;heterocyclic compound binding;RNA binding;	3;6;1;2;4;7;3;5;	K03236	map03013;	RNA transport;	IPR006196;IPR012340;IPR001253;	RNA-binding domain, S1, IF1 type;Nucleic acid-binding, OB-fold;Translation initiation factor 1A (eIF-1A);	nucleus	Hs4503499	221	J	[J] Translation, ribosomal structure and biogenesis;
T5A8W0	Valyl-tRNA synthetase OS=Ophiocordyceps sinensis (strain Co18 / CGMCC 3.14243) OX=911162 GN=OCS_06049 PE=3 SV=1	up	2.076	1.421	1.377	1.329	0.693	0.881	0.865	0.967	0.914	0.964	0.925	0.951	1.8212	0.00922791	0.9073	0.187697	1.65237	0.0133111	GO:0044281;GO:1901360;GO:0044710;GO:0043043;GO:0043436;GO:0046483;GO:1901564;GO:1901566;GO:0019538;GO:0043038;GO:0043039;GO:0006807;GO:0043170;GO:0044267;GO:0044260;GO:0008150;GO:0008152;GO:0016070;GO:0044271;GO:0043603;GO:0006518;GO:0006438;GO:0044249;GO:0034641;GO:0034645;GO:0044699;GO:0006139;GO:0009987;GO:0006725;GO:0043604;GO:0006082;GO:0019752;GO:0090304;GO:0034660;GO:0006520;GO:0071704;GO:…	small molecule metabolic process;organic cyclic compound metabolic process;single-organism metabolic process;peptide biosynthetic process;oxoacid metabolic process;heterocycle metabolic process;organonitrogen compound metabolic process;organonitrogen compound biosynthetic process;protein metabolic process;amino acid activation;tRNA aminoacylation;nitrogen compound metabolic process;macromolecule …	4;4;3;6;5;4;4;5;4;5;6;3;4;5;4;1;2;5;5;5;5;8;4;4;5;2;4;2;4;6;4;6;5;6;4;3;5;4;3;5;3;3;3;7;7;6;	GO:0043231;GO:0044424;GO:0043229;GO:0043227;GO:0043226;GO:0005737;GO:0044444;GO:0005739;GO:0044464;GO:0005623;GO:0005622;GO:0005575;	intracellular membrane-bounded organelle;intracellular part;intracellular organelle;membrane-bounded organelle;organelle;cytoplasm;cytoplasmic part;mitochondrion;cell part;cell;intracellular;cellular_component;	4;3;3;3;2;4;4;5;2;2;3;1;	GO:1901363;GO:0004812;GO:0000166;GO:0097367;GO:0016787;GO:0003674;GO:0005488;GO:0002161;GO:0004832;GO:1901265;GO:0032549;GO:0017076;GO:0005524;GO:0016788;GO:0003824;GO:0097159;GO:0032559;GO:0032555;GO:0032550;GO:0032553;GO:0035639;GO:0043168;GO:0043167;GO:0052689;GO:0030554;GO:0001883;GO:0001882;GO:0036094;GO:0016874;GO:0016875;GO:0016876;	heterocyclic compound binding;aminoacyl-tRNA ligase activity;nucleotide binding;carbohydrate derivative binding;hydrolase activity;molecular_function;binding;aminoacyl-tRNA editing activity;valine-tRNA ligase activity;nucleoside phosphate binding;ribonucleoside binding;purine nucleotide binding;ATP binding;hydrolase activity, acting on ester bonds;catalytic activity;organic cyclic compound bindin…	3;6;4;3;3;1;2;6;7;4;5;5;6;4;2;3;6;5;6;4;5;4;3;5;6;5;4;3;3;4;5;	K01873	map00970;	Aminoacyl-tRNA biosynthesis;	IPR009080;IPR033705;IPR014729;IPR001412;IPR002303;IPR002300;IPR009008;IPR013155;IPR019499;	Aminoacyl-tRNA synthetase, class Ia, anticodon-binding;Valyl tRNA synthetase, anticodon-binding domain;Rossmann-like alpha/beta/alpha sandwich fold;Aminoacyl-tRNA synthetase, class I, conserved site;Valine-tRNA ligase;Aminoacyl-tRNA synthetase, class Ia;Valyl/Leucyl/Isoleucyl-tRNA synthetase, editing domain;Methionyl/Valyl/Leucyl/Isoleucyl-tRNA synthetase, anticodon-binding;Valyl-tRNA synthetase,…	cytosol	YGR094w	1113	J	[J] Translation, ribosomal structure and biogenesis;
T5AAF6	Eukaryotic translation initiation factor 3 subunit M OS=Ophiocordyceps sinensis (strain Co18 / CGMCC 3.14243) OX=911162 GN=OCS_04723 PE=3 SV=1	up	1.968	1.834	1.438	1.282	0.919	0.827	0.826	1.01	0.677	0.726	0.669	0.73	1.82076	0.00463867	1.27837	0.00588328	2.32762	0.00123428	GO:0022607;GO:0080090;GO:0019222;GO:0051246;GO:0043933;GO:0034622;GO:0031323;GO:1901564;GO:0044249;GO:0034641;GO:0006807;GO:0044237;GO:0034645;GO:0043170;GO:0050789;GO:0071840;GO:0043043;GO:0044267;GO:0071826;GO:0044260;GO:0016043;GO:0065003;GO:0071704;GO:0010467;GO:0022618;GO:0065007;GO:0031326;GO:0022613;GO:2000112;GO:0010468;GO:1901576;GO:0060255;GO:0006446;GO:0009987;GO:0009889;GO:0050794;GO:…	cellular component assembly;regulation of primary metabolic process;regulation of metabolic process;regulation of protein metabolic process;macromolecular complex subunit organization;cellular macromolecular complex assembly;regulation of cellular metabolic process;organonitrogen compound metabolic process;cellular biosynthetic process;cellular nitrogen compound metabolic process;nitrogen compoun…	4;4;3;5;4;6;4;4;4;4;3;3;5;4;2;2;6;5;5;4;3;5;3;5;5;2;5;4;6;5;4;4;5;2;4;3;6;3;5;1;4;2;5;5;5;6;3;5;5;5;4;5;6;5;4;6;3;	GO:1990904;GO:0033290;GO:0005737;GO:0005852;GO:0016282;GO:0070993;GO:0030529;GO:0043234;GO:0032991;GO:0044464;GO:0005623;GO:0005622;GO:0005575;GO:0044444;GO:0044424;	ribonucleoprotein complex;eukaryotic 48S preinitiation complex;cytoplasm;eukaryotic translation initiation factor 3 complex;eukaryotic 43S preinitiation complex;translation preinitiation complex;intracellular ribonucleoprotein complex;protein complex;macromolecular complex;cell part;cell;intracellular;cellular_component;cytoplasmic part;intracellular part;	3;6;4;4;6;5;4;3;2;2;2;3;1;4;3;	GO:0005488;GO:0003674;GO:0003676;GO:0008135;GO:0097159;GO:0003723;GO:0003743;GO:1901363;	binding;molecular_function;nucleic acid binding;translation factor activity, RNA binding;organic cyclic compound binding;RNA binding;translation initiation factor activity;heterocyclic compound binding;	2;1;4;6;3;5;7;3;	K15030			IPR000717;IPR027528;IPR011991;	Proteasome component (PCI) domain;Eukaryotic translation initiation factor 3 subunit M;Winged helix-turn-helix DNA-binding domain;	nucleus	SPAC1751.03	178	R	[R] General function prediction only;
T5AB24	Reticulon-like protein OS=Ophiocordyceps sinensis (strain Co18 / CGMCC 3.14243) OX=911162 GN=OCS_05256 PE=4 SV=1	up	1.313	1.305	1.647	1.5	0.826	0.873	0.668	0.806	0.974	0.861	0.739	0.77	1.81689	0.000437538	0.94886	0.556928	1.72398	0.000809131													IPR003388;	Reticulon;	cytosol
T5AFU2	Glycoside hydrolase family 18 OS=Ophiocordyceps sinensis (strain Co18 / CGMCC 3.14243) OX=911162 GN=OCS_02998 PE=3 SV=1	up	1.514	1.405	1.639	1.392	0.797	0.844	0.804	0.833	1.14	1.1	1.081	1.051	1.81515	2.71378e-05	0.74977	1.56274e-05	1.36093	0.000613975	GO:0046348;GO:0006807;GO:0006022;GO:1901575;GO:0071704;GO:0006032;GO:0000272;GO:0008150;GO:0008152;GO:0006030;GO:0005975;GO:0009056;GO:0009057;GO:0044238;GO:1901564;GO:1901565;GO:0005976;GO:0006040;GO:1901136;GO:1901135;GO:0016052;GO:0043170;GO:1901072;GO:1901071;GO:0006026;	amino sugar catabolic process;nitrogen compound metabolic process;aminoglycan metabolic process;organic substance catabolic process;organic substance metabolic process;chitin catabolic process;polysaccharide catabolic process;biological_process;metabolic process;chitin metabolic process;carbohydrate metabolic process;catabolic process;macromolecule catabolic process;primary metabolic process;orga…	6;3;5;4;3;7;6;1;2;6;4;3;5;3;4;5;5;5;5;4;5;4;7;6;6;				GO:0016798;GO:0003674;GO:0008061;GO:0004568;GO:0016787;GO:0003824;GO:0097367;GO:0004553;GO:0005488;	hydrolase activity, acting on glycosyl bonds;molecular_function;chitin binding;chitinase activity;hydrolase activity;catalytic activity;carbohydrate derivative binding;hydrolase activity, hydrolyzing O-glycosyl compounds;binding;	4;1;4;6;3;2;3;5;2;	K01183	map00520;map01100;	Amino sugar and nucleotide sugar metabolism;Metabolic pathways;	IPR001579;IPR001223;IPR011583;IPR017853;IPR029070;	Glycoside hydrolase, chitinase active site;Glycoside hydrolase family 18, catalytic domain;Chitinase II;Glycoside hydrolase superfamily;Chitinase insertion domain;	extracellular	YDR371w	210	G	[G] Carbohydrate transport and metabolism;
T5ADL3	C-1-tetrahydrofolate synthase OS=Ophiocordyceps sinensis (strain Co18 / CGMCC 3.14243) OX=911162 GN=OCS_03776 PE=3 SV=1	up	2.581	1.614	1.732	1.141	0.888	1.004	1.028	0.974	0.649	0.808	0.652	0.95	1.81511	0.0389314	1.27297	0.0371685	2.31056	0.0174723	GO:0051188;GO:0009165;GO:0044281;GO:0044283;GO:1901362;GO:1901360;GO:0044710;GO:0044711;GO:0042440;GO:0043650;GO:0006767;GO:0006766;GO:0006760;GO:0000097;GO:0000096;GO:0043436;GO:0046483;GO:0043648;GO:1901564;GO:0006575;GO:1901566;GO:0016053;GO:0006163;GO:0006164;GO:0019438;GO:0042398;GO:0006807;GO:0009066;GO:0046653;GO:0046655;GO:0046654;GO:0046656;GO:1901576;GO:0051186;GO:0035999;GO:0042558;GO:…	cofactor biosynthetic process;nucleotide biosynthetic process;small molecule metabolic process;small molecule biosynthetic process;organic cyclic compound biosynthetic process;organic cyclic compound metabolic process;single-organism metabolic process;single-organism biosynthetic process;pigment metabolic process;dicarboxylic acid biosynthetic process;water-soluble vitamin metabolic process;vitam…	5;6;4;5;5;4;3;4;4;7;6;5;5;6;5;5;4;7;4;4;5;5;6;7;5;5;3;6;6;6;7;6;4;4;5;5;6;4;5;1;2;5;5;5;5;5;6;5;6;5;6;5;4;4;4;8;2;4;6;7;5;6;2;4;4;6;4;5;5;5;7;7;6;6;5;5;6;6;4;3;5;6;5;3;4;3;3;6;3;5;4;4;6;	GO:0005829;GO:0044424;GO:0044444;GO:0005737;GO:0044464;GO:0005623;GO:0005622;GO:0005575;	cytosol;intracellular part;cytoplasmic part;cytoplasm;cell part;cell;intracellular;cellular_component;	5;3;4;4;2;2;3;1;	GO:1901363;GO:0000166;GO:0035639;GO:0017076;GO:0097367;GO:0016814;GO:0016810;GO:0003674;GO:0003676;GO:0003677;GO:1901265;GO:0019238;GO:0032549;GO:0005524;GO:0016787;GO:0003824;GO:0016879;GO:0097159;GO:0032559;GO:0032555;GO:0032553;GO:0016491;GO:0004329;GO:0036094;GO:0043167;GO:0003697;GO:0030554;GO:0032550;GO:0005488;GO:0001883;GO:0001882;GO:0016646;GO:0016645;GO:0004488;GO:0016874;GO:0004477;GO:…	heterocyclic compound binding;nucleotide binding;purine ribonucleoside triphosphate binding;purine nucleotide binding;carbohydrate derivative binding;hydrolase activity, acting on carbon-nitrogen (but not peptide) bonds, in cyclic amidines;hydrolase activity, acting on carbon-nitrogen (but not peptide) bonds;molecular_function;nucleic acid binding;DNA binding;nucleoside phosphate binding;cyclohyd…	3;4;5;5;3;5;4;1;4;5;4;6;5;6;3;2;4;3;6;5;4;3;5;3;3;6;6;6;2;5;4;5;4;6;3;7;4;	K00288	map00670;map01100;	One carbon pool by folate;Metabolic pathways;	IPR000559;IPR020867;IPR027417;IPR000672;IPR020628;IPR020631;IPR020630;IPR016040;	Formate-tetrahydrofolate ligase, FTHFS;Tetrahydrofolate dehydrogenase/cyclohydrolase, conserved site;P-loop containing nucleoside triphosphate hydrolase;Tetrahydrofolate dehydrogenase/cyclohydrolase;Formate-tetrahydrofolate ligase, FTHFS, conserved site;Tetrahydrofolate dehydrogenase/cyclohydrolase, NAD(P)-binding domain;Tetrahydrofolate dehydrogenase/cyclohydrolase, catalytic domain;NAD(P)-bindi…	mitochondria	SPBC839.16	1172	H	[H] Coenzyme transport and metabolism;
T5AIJ1	Fimbrin OS=Ophiocordyceps sinensis (strain Co18 / CGMCC 3.14243) OX=911162 GN=OCS_02712 PE=4 SV=1	up	1.776	1.282	1.527	1.258	0.811	0.865	0.7	0.853	0.915	0.851	1.054	0.874	1.80953	0.0021305	0.87412	0.0962475	1.58175	0.00604769	GO:0043933;GO:0030036;GO:0044699;GO:0071822;GO:0016043;GO:0071840;GO:0030029;GO:0009987;GO:0008150;GO:0006996;GO:0007015;GO:0007010;GO:1902589;GO:0044763;	macromolecular complex subunit organization;actin cytoskeleton organization;single-organism process;protein complex subunit organization;cellular component organization;cellular component organization or biogenesis;actin filament-based process;cellular process;biological_process;organelle organization;actin filament organization;cytoskeleton organization;single-organism organelle organization;sin…	4;5;2;5;3;2;4;2;1;4;6;5;4;3;	GO:0032432;GO:0015629;GO:0061645;GO:0043229;GO:0043228;GO:0030864;GO:0043226;GO:0005856;GO:0005575;GO:0044444;GO:0044430;GO:0005737;GO:0099568;GO:0030479;GO:0005938;GO:0043232;GO:0030863;GO:0044464;GO:0005623;GO:0005622;GO:0044446;GO:0071944;GO:0044448;GO:0044424;GO:0044422;	actin filament bundle;actin cytoskeleton;endocytic patch;intracellular organelle;non-membrane-bounded organelle;cortical actin cytoskeleton;organelle;cytoskeleton;cellular_component;cytoplasmic part;cytoskeletal part;cytoplasm;cytoplasmic region;actin cortical patch;cell cortex;intracellular non-membrane-bounded organelle;cortical cytoskeleton;cell part;cell;intracellular;intracellular organelle …	5;6;6;3;3;5;2;5;1;4;4;4;5;5;4;4;6;2;2;3;3;3;5;3;2;	GO:0003674;GO:0005488;GO:0043167;GO:0003779;GO:0032403;GO:0046872;GO:0044877;GO:0043169;GO:0051015;GO:0060090;GO:0030674;GO:0008092;GO:0005515;	molecular_function;binding;ion binding;actin binding;protein complex binding;metal ion binding;macromolecular complex binding;cation binding;actin filament binding;binding, bridging;protein binding, bridging;cytoskeletal protein binding;protein binding;	1;2;3;5;4;5;3;4;5;3;4;4;3;	K17275			IPR001715;IPR011992;IPR001589;	Calponin homology domain;EF-hand domain pair;Actinin-type actin-binding domain, conserved site;	nucleus	YDR129c	842	Z	[Z] Cytoskeleton;
T5A8N3	Vacuolar protein 8 OS=Ophiocordyceps sinensis (strain Co18 / CGMCC 3.14243) OX=911162 GN=OCS_05521 PE=4 SV=1	up	1.338	1.708	1.545	1.202	0.837	0.661	0.798	0.915	0.998	0.818	1.008	0.826	1.80411	0.0019766	0.87973	0.191508	1.58712	0.00485045	GO:0008104;GO:0061025;GO:0061024;GO:0071840;GO:0044712;GO:0044710;GO:0070727;GO:0033036;GO:0097576;GO:0006605;GO:0045184;GO:0000011;GO:0016050;GO:0022607;GO:0010324;GO:0006886;GO:0016043;GO:0032258;GO:0006810;GO:0006623;GO:0044804;GO:0008150;GO:0008152;GO:0044801;GO:0051234;GO:1902534;GO:0046907;GO:0044802;GO:0042144;GO:0048308;GO:0072666;GO:0072665;GO:0034727;GO:0044699;GO:0022614;GO:0071255;GO:…	protein localization;membrane fusion;membrane organization;cellular component organization or biogenesis;single-organism catabolic process;single-organism metabolic process;cellular macromolecule localization;macromolecule localization;vacuole fusion;protein targeting;establishment of protein localization;vacuole inheritance;vesicle organization;cellular component assembly;membrane invagination;i…	4;5;4;2;4;3;4;3;6;6;4;6;5;4;5;6;3;6;4;5;4;1;2;5;3;5;5;4;5;5;6;7;5;2;5;6;5;2;5;6;5;6;4;4;4;5;3;5;4;3;4;5;3;2;3;3;4;4;3;5;5;5;4;	GO:0005773;GO:0016020;GO:0005774;GO:0005794;GO:0098588;GO:0000329;GO:0043234;GO:0043231;GO:0044424;GO:0098852;GO:0043229;GO:0043227;GO:0043226;GO:0044437;GO:0012505;GO:0044446;GO:0044444;GO:0044422;GO:0000324;GO:0000323;GO:0000322;GO:0005737;GO:0031090;GO:0044464;GO:0005623;GO:0005622;GO:0071561;GO:0071563;GO:0098805;GO:0032991;GO:0044232;GO:0005575;	vacuole;membrane;vacuolar membrane;Golgi apparatus;bounding membrane of organelle;fungal-type vacuole membrane;protein complex;intracellular membrane-bounded organelle;intracellular part;lytic vacuole membrane;intracellular organelle;membrane-bounded organelle;organelle;vacuolar part;endomembrane system;intracellular organelle part;cytoplasmic part;organelle part;fungal-type vacuole;lytic vacuole…	5;2;4;4;4;6;3;4;3;5;3;3;2;4;3;3;4;2;7;6;6;4;3;2;2;3;4;4;3;2;3;1;				K08332	map04140;	Regulation of autophagy;	IPR016024;IPR011989;IPR000225;	Armadillo-type fold;Armadillo-like helical;Armadillo;	cytosol, nucleus	SPBC354.14c	731	U	[U] Intracellular trafficking, secretion, and vesicular transport;
T5ADI9	Eukaryotic translation initiation factor 3 subunit C OS=Ophiocordyceps sinensis (strain Co18 / CGMCC 3.14243) OX=911162 GN=NIP1 PE=3 SV=1	up	1.839	1.407	1.731	1.333	0.845	0.961	0.801	0.892	0.871	0.863	0.76	0.735	1.80336	0.00149404	1.08362	0.216634	1.95417	0.000934835	GO:0080090;GO:0019222;GO:0071840;GO:0010608;GO:0043043;GO:0060255;GO:0006446;GO:1901564;GO:0044707;GO:1901566;GO:0019538;GO:0022607;GO:0044267;GO:0044260;GO:0016043;GO:0065003;GO:0065007;GO:0009889;GO:0050794;GO:0008150;GO:0008152;GO:0044271;GO:0010556;GO:0006518;GO:0044249;GO:0034641;GO:0034645;GO:0044699;GO:0051246;GO:0022618;GO:0022613;GO:0032502;GO:0032501;GO:0009987;GO:0034248;GO:0043604;GO:…	regulation of primary metabolic process;regulation of metabolic process;cellular component organization or biogenesis;posttranscriptional regulation of gene expression;peptide biosynthetic process;regulation of macromolecule metabolic process;regulation of translational initiation;organonitrogen compound metabolic process;single-multicellular organism process;organonitrogen compound biosynthetic …	4;3;2;6;6;4;5;4;3;5;4;4;5;4;3;5;2;4;3;1;2;5;5;5;4;4;5;2;5;5;4;2;2;2;5;6;5;5;4;3;4;5;4;6;4;5;6;2;3;5;4;5;4;3;3;5;4;5;3;3;3;3;6;4;6;	GO:0035770;GO:0030529;GO:0043234;GO:0005829;GO:0044424;GO:0044464;GO:0043232;GO:0043229;GO:0043228;GO:0036464;GO:0005622;GO:0043226;GO:0005852;GO:0016282;GO:0070993;GO:0010494;GO:0044444;GO:0005737;GO:0043614;GO:0033290;GO:1990904;GO:0005623;GO:0071540;GO:0032991;GO:0071541;GO:0005575;	ribonucleoprotein granule;intracellular ribonucleoprotein complex;protein complex;cytosol;intracellular part;cell part;intracellular non-membrane-bounded organelle;intracellular organelle;non-membrane-bounded organelle;cytoplasmic ribonucleoprotein granule;intracellular;organelle;eukaryotic translation initiation factor 3 complex;eukaryotic 43S preinitiation complex;translation preinitiation comp…	5;4;3;5;3;2;4;3;3;5;3;2;4;6;5;6;4;4;5;6;3;2;5;2;5;1;	GO:1901363;GO:0003674;GO:0003676;GO:0097159;GO:0003743;GO:0003723;GO:0005488;GO:0008135;	heterocyclic compound binding;molecular_function;nucleic acid binding;organic cyclic compound binding;translation initiation factor activity;RNA binding;binding;translation factor activity, RNA binding;	3;1;4;3;7;5;2;6;	K03252	map03013;	RNA transport;	IPR000717;IPR027516;IPR008905;IPR011991;	Proteasome component (PCI) domain;Eukaryotic translation initiation factor 3 subunit C;Eukaryotic translation initiation factor 3 subunit C, N-terminal domain;Winged helix-turn-helix DNA-binding domain;	nucleus	SPAC4A8.16c	574	J	[J] Translation, ribosomal structure and biogenesis;
T5A7S9	Major facilitator superfamily domain, general substrate transporter OS=Ophiocordyceps sinensis (strain Co18 / CGMCC 3.14243) OX=911162 GN=OCS_02743 PE=4 SV=1	up	1.145	1.86	2.056	1.239	1.036	0.852	0.616	0.993	0.862	0.861	0.837	1.062	1.80154	0.0286096	0.96549	0.782457	1.73937	0.0276479	GO:1902047;GO:0072488;GO:1903710;GO:0044699;GO:0051179;GO:0071705;GO:0098662;GO:0015696;GO:0015672;GO:0006810;GO:0015846;GO:0006812;GO:0006811;GO:0009987;GO:0034220;GO:0044765;GO:0008150;GO:0051234;GO:0055085;GO:1902578;GO:0000296;GO:0071702;GO:0098660;GO:0044763;GO:0098655;	polyamine transmembrane transport;ammonium transmembrane transport;spermine transmembrane transport;single-organism process;localization;nitrogen compound transport;inorganic cation transmembrane transport;ammonium transport;monovalent inorganic cation transport;transport;polyamine transport;cation transport;ion transport;cellular process;ion transmembrane transport;single-organism transport;biol…	5;7;6;2;2;5;7;6;7;4;5;6;5;2;5;4;1;3;4;3;6;5;6;3;6;	GO:0005886;GO:0031224;GO:0043229;GO:0071944;GO:0005622;GO:0043227;GO:0043226;GO:0005737;GO:0016021;GO:0016020;GO:0005794;GO:0012505;GO:0044425;GO:0044464;GO:0005623;GO:0043231;GO:0005575;GO:0044444;GO:0044424;	plasma membrane;intrinsic component of membrane;intracellular organelle;cell periphery;intracellular;membrane-bounded organelle;organelle;cytoplasm;integral component of membrane;membrane;Golgi apparatus;endomembrane system;membrane part;cell part;cell;intracellular membrane-bounded organelle;cellular_component;cytoplasmic part;intracellular part;	3;3;3;3;3;3;2;4;4;2;4;3;2;2;2;4;1;4;3;	GO:0003674;GO:0015075;GO:0015077;GO:0022857;GO:0005215;GO:0015203;GO:0008324;GO:0022891;GO:0022890;GO:0022892;GO:0000297;GO:0008519;	molecular_function;ion transmembrane transporter activity;monovalent inorganic cation transmembrane transporter activity;transmembrane transporter activity;transporter activity;polyamine transmembrane transporter activity;cation transmembrane transporter activity;substrate-specific transmembrane transporter activity;inorganic cation transmembrane transporter activity;substrate-specific transporte…	1;5;8;3;2;5;6;4;7;3;6;9;				IPR020846;IPR011701;	Major facilitator superfamily domain;Major facilitator superfamily;	plasma membrane	SPBC1271.10c	158	R	[R] General function prediction only;
T5AQ20	Uncharacterized protein OS=Ophiocordyceps sinensis (strain Co18 / CGMCC 3.14243) OX=911162 GN=OCS_00434 PE=4 SV=1	up	1.605	1.2	1.24	1.474	0.7	0.876	0.817	0.672	0.654	0.893	0.823	0.874	1.80067	0.00126818	0.94482	0.560669	1.70129	0.00213678													IPR032710;	NTF2-like domain;	nucleus
T5AHY7	CCR4-Not complex component, Not1 OS=Ophiocordyceps sinensis (strain Co18 / CGMCC 3.14243) OX=911162 GN=OCS_02110 PE=4 SV=1	up	1.707	1.752	1.385	1.268	0.666	0.838	0.987	0.907	0.967	0.591	0.996	0.837	1.79869	0.00260133	1.00206	0.988336	1.80242	0.00404265	GO:0080090;GO:0019222;GO:2000112;GO:1901362;GO:1901360;GO:1901361;GO:0051716;GO:0000003;GO:0010467;GO:0048518;GO:0046483;GO:0060255;GO:0032784;GO:0032786;GO:2001141;GO:0010033;GO:0051704;GO:0044703;GO:0071444;GO:0019439;GO:0019438;GO:0034645;GO:0009891;GO:0030447;GO:0051254;GO:0006807;GO:0050789;GO:0097659;GO:1901576;GO:1901575;GO:0044265;GO:0016049;GO:0044260;GO:0065007;GO:0007049;GO:0006366;GO:…	regulation of primary metabolic process;regulation of metabolic process;regulation of cellular macromolecule biosynthetic process;organic cyclic compound biosynthetic process;organic cyclic compound metabolic process;organic cyclic compound catabolic process;cellular response to stimulus;reproduction;gene expression;positive regulation of biological process;heterocycle metabolic process;regulatio…	4;3;6;5;4;5;3;2;5;2;4;4;7;7;6;4;2;3;6;5;5;5;4;3;5;3;2;7;4;4;5;3;4;2;4;7;8;5;5;4;4;5;1;2;5;5;3;5;4;5;6;5;5;2;7;6;5;5;6;6;3;4;4;4;4;8;2;3;4;9;9;7;8;5;2;4;7;6;5;4;4;6;8;5;7;5;5;4;4;5;4;4;2;3;3;5;7;6;7;5;5;5;2;3;3;3;4;4;3;3;5;3;4;3;3;	GO:0043234;GO:0043231;GO:0030014;GO:0043229;GO:0005622;GO:0043227;GO:0044424;GO:0030015;GO:0005737;GO:0005634;GO:0044464;GO:0005623;GO:0043226;GO:0032991;GO:0005575;	protein complex;intracellular membrane-bounded organelle;CCR4-NOT complex;intracellular organelle;intracellular;membrane-bounded organelle;intracellular part;CCR4-NOT core complex;cytoplasm;nucleus;cell part;cell;organelle;macromolecular complex;cellular_component;	3;4;4;3;3;3;3;4;4;5;2;2;2;2;1;	GO:0003674;GO:0005488;GO:0042802;GO:0005515;	molecular_function;binding;identical protein binding;protein binding;	1;2;4;3;	K12604	map03018;	RNA degradation;	IPR024557;IPR007196;IPR032191;IPR032193;IPR032194;	CCR4-Not complex, Not1 subunit, domain of unknown function DUF3819;CCR4-Not complex component, Not1, C-terminal;CCR4-NOT transcription complex subunit 1, CAF1-binding domain;CCR4-NOT transcription complex subunit 1, TTP binding domain;CCR4-NOT transcription complex subunit 1, HEAT repeat;	plasma membrane	SPAC20G8.06	639	K	[K] Transcription;
T5ADK9	Blastomyces-phase-specific protein OS=Ophiocordyceps sinensis (strain Co18 / CGMCC 3.14243) OX=911162 GN=OCS_04468 PE=4 SV=1	up	1.464	1.685	1.323	1.991	0.837	0.843	1.127	0.791	0.95	0.943	1.195	0.723	1.79627	0.00480962	0.94411	0.68073	1.69588	0.00900158				GO:0005575;GO:0005576;	cellular_component;extracellular region;	1;2;							IPR006771;	Blastomyces yeast-phase-specific protein;	extracellular
T5AGM5	Heat shock protein 30 OS=Ophiocordyceps sinensis (strain Co18 / CGMCC 3.14243) OX=911162 GN=OCS_03385 PE=3 SV=1	up	1.476	1.079	1.41	0.923	0.473	0.773	0.789	0.687	1.456	1.246	0.586	2.052	1.79575	0.0115148	0.50974	0.0800212	0.91536	0.743761				GO:0005737;GO:0044464;GO:0005623;GO:0005622;GO:0005575;GO:0044424;	cytoplasm;cell part;cell;intracellular;cellular_component;intracellular part;	4;2;2;3;1;3;							IPR008978;IPR002068;	HSP20-like chaperone;Alpha crystallin/Hsp20 domain;	cytosol, nucleus	SPBC3E7.02c	51.2	O	[O] Posttranslational modification, protein turnover, chaperones;
T5A940	DUF1708 domain-containing protein OS=Ophiocordyceps sinensis (strain Co18 / CGMCC 3.14243) OX=911162 GN=OCS_02285 PE=4 SV=1	up	2.273	1.277	1.407	1.285	0.671	0.934	1.066	0.806	0.748	0.877	0.854	0.764	1.79524	0.034536	1.07216	0.542543	1.92476	0.0209945													IPR012965;	Domain of unknown function DUF1708;	mitochondria
T5AI60	Cell division protein GTP binding protein OS=Ophiocordyceps sinensis (strain Co18 / CGMCC 3.14243) OX=911162 GN=OCS_02832 PE=3 SV=1	up	1.377	1.467	1.477	1.634	0.809	0.925	0.821	0.77	0.842	0.735	0.709	0.755	1.79099	4.45855e-05	1.09339	0.156855	1.95824	2.0235e-05	GO:1903047;GO:1902589;GO:0022402;GO:0061640;GO:0007067;GO:0007049;GO:0071840;GO:0000280;GO:0000281;GO:0016043;GO:0008150;GO:0051301;GO:0048285;GO:0009987;GO:0000278;GO:0044763;GO:0044699;GO:0006996;GO:0000910;	mitotic cell cycle process;single-organism organelle organization;cell cycle process;cytoskeleton-dependent cytokinesis;mitotic nuclear division;cell cycle;cellular component organization or biogenesis;nuclear division;mitotic cytokinesis;cellular component organization;biological_process;cell division;organelle fission;cellular process;mitotic cell cycle;single-organism cellular process;single-o…	5;4;4;6;5;4;2;6;6;3;1;4;5;2;5;3;2;4;5;	GO:0043229;GO:0043228;GO:0043226;GO:0005737;GO:0005575;GO:0005940;GO:0044430;GO:0005856;GO:0031105;GO:0032153;GO:0099568;GO:0032156;GO:0005938;GO:0043234;GO:0032991;GO:0043232;GO:0005829;GO:0044464;GO:0005623;GO:0005622;GO:0044446;GO:0044444;GO:0071944;GO:0044448;GO:0044424;GO:0044422;	intracellular organelle;non-membrane-bounded organelle;organelle;cytoplasm;cellular_component;septin ring;cytoskeletal part;cytoskeleton;septin complex;cell division site;cytoplasmic region;septin cytoskeleton;cell cortex;protein complex;macromolecular complex;intracellular non-membrane-bounded organelle;cytosol;cell part;cell;intracellular;intracellular organelle part;cytoplasmic part;cell perip…	3;3;2;4;1;5;4;5;4;3;5;6;4;3;2;4;5;2;2;3;3;4;3;5;3;2;	GO:0003674;GO:0035639;GO:1901363;GO:0001883;GO:0032550;GO:0043167;GO:0001882;GO:0000166;GO:0032561;GO:0032553;GO:0032549;GO:0017076;GO:1901265;GO:0036094;GO:0032555;GO:0097367;GO:0097159;GO:0019001;GO:0005525;GO:0043168;GO:0005488;	molecular_function;purine ribonucleoside triphosphate binding;heterocyclic compound binding;purine nucleoside binding;purine ribonucleoside binding;ion binding;nucleoside binding;nucleotide binding;guanyl ribonucleotide binding;ribonucleotide binding;ribonucleoside binding;purine nucleotide binding;nucleoside phosphate binding;small molecule binding;purine ribonucleotide binding;carbohydrate deri…	1;5;3;5;6;3;4;4;6;4;5;5;4;3;5;3;3;6;6;4;2;	K16945			IPR030379;IPR027417;IPR016491;	Septin-type guanine nucleotide-binding (G) domain;P-loop containing nucleoside triphosphate hydrolase;Septin;	nucleus	YJR076c	316	DZU	[D] Cell cycle control, cell division, chromosome partitioning;[Z] Cytoskeleton;[U] Intracellular trafficking, secretion, and vesicular transport;
T5ACY1	Coatomer subunit beta OS=Ophiocordyceps sinensis (strain Co18 / CGMCC 3.14243) OX=911162 GN=OCS_00972 PE=4 SV=1	up	2.03	1.217	1.965	0.984	0.766	0.943	0.746	1.009	0.852	0.879	0.756	0.951	1.78868	0.0455623	1.00756	0.935085	1.80221	0.0414594	GO:0008104;GO:0044699;GO:0006888;GO:0070727;GO:0006886;GO:0071702;GO:0033036;GO:0034613;GO:0048193;GO:0006810;GO:0045184;GO:0044765;GO:0008150;GO:0051649;GO:0051234;GO:0051179;GO:1902578;GO:0051641;GO:0016192;GO:0046907;GO:0015031;GO:1902582;	protein localization;single-organism process;ER to Golgi vesicle-mediated transport;cellular macromolecule localization;intracellular protein transport;organic substance transport;macromolecule localization;cellular protein localization;Golgi vesicle transport;transport;establishment of protein localization;single-organism transport;biological_process;establishment of localization in cell;establi…	4;2;7;4;6;5;3;5;6;4;4;4;1;4;3;2;3;3;5;5;5;5;	GO:0043231;GO:0005829;GO:0031090;GO:0043229;GO:0044425;GO:0030133;GO:0030135;GO:0043226;GO:0005737;GO:0044446;GO:0031982;GO:0030663;GO:0016023;GO:0031410;GO:0016020;GO:0030659;GO:0031988;GO:0044433;GO:0044431;GO:0030137;GO:0030120;GO:0030117;GO:0005794;GO:0098588;GO:0005798;GO:0044424;GO:0012505;GO:0012506;GO:0043234;GO:0030134;GO:0030126;GO:0043227;GO:0032991;GO:0000139;GO:0030660;GO:0030662;GO:…	intracellular membrane-bounded organelle;cytosol;organelle membrane;intracellular organelle;membrane part;transport vesicle;coated vesicle;organelle;cytoplasm;intracellular organelle part;vesicle;COPI-coated vesicle membrane;cytoplasmic, membrane-bounded vesicle;cytoplasmic vesicle;membrane;cytoplasmic vesicle membrane;membrane-bounded vesicle;cytoplasmic vesicle part;Golgi apparatus part;COPI-co…	4;5;3;3;2;4;6;2;4;3;4;5;5;5;2;5;5;4;4;6;5;4;4;4;5;3;3;4;3;5;5;3;2;5;4;4;2;2;3;1;3;4;3;3;2;4;	GO:0003674;GO:0005198;	molecular_function;structural molecule activity;	1;2;	K17301			IPR016024;IPR011710;IPR002553;IPR016460;IPR029446;IPR011989;	Armadillo-type fold;Coatomer beta subunit, C-terminal;Clathrin/coatomer adaptor, adaptin-like, N-terminal;Coatomer beta subunit (COPB1);Coatomer beta subunit, appendage platform domain;Armadillo-like helical;	cytosol, nucleus	SPBC146.14c	993	U	[U] Intracellular trafficking, secretion, and vesicular transport;
T5AKZ0	Uncharacterized protein OS=Ophiocordyceps sinensis (strain Co18 / CGMCC 3.14243) OX=911162 GN=OCS_01793 PE=4 SV=1	up	1.501	1.227	1.698	1.459	0.775	0.971	0.768	0.779	1.275	1.246	1.081	1.079	1.78712	0.000988376	0.70348	0.0029375	1.25721	0.0338612															mitochondria
T5ACT5	Stress responsive A/B barrel domain protein OS=Ophiocordyceps sinensis (strain Co18 / CGMCC 3.14243) OX=911162 GN=OCS_04721 PE=4 SV=1	up	1.212	1.439	1.704	1.739	0.9	0.86	0.835	0.821	1.001	0.884	0.659	0.87	1.78396	0.00171814	1.00059	0.994775	1.785	0.00333032													IPR013097;IPR011008;	Stress responsive alpha-beta barrel;Dimeric alpha-beta barrel;	cytosol	283782235	52	E	[E] Amino acid transport and metabolism;	COG2755	Lysophospholipase L1 or related esterase
T5AA86	Proteasome subunit beta OS=Ophiocordyceps sinensis (strain Co18 / CGMCC 3.14243) OX=911162 GN=OCS_05647 PE=3 SV=1	up	1.882	1.673	1.789	0.937	0.816	0.799	0.825	1.086	0.864	0.967	1.038	1.164	1.78132	0.0225679	0.87429	0.221792	1.5574	0.0462475	GO:0044248;GO:0043632;GO:0044267;GO:1901575;GO:0044265;GO:0044260;GO:0043161;GO:0071704;GO:0006511;GO:0006508;GO:0051603;GO:0009987;GO:0019941;GO:0008150;GO:0030163;GO:0008152;GO:0044257;GO:0009056;GO:0009057;GO:0044238;GO:0019538;GO:0010498;GO:0010499;GO:0044237;GO:0043170;	cellular catabolic process;modification-dependent macromolecule catabolic process;cellular protein metabolic process;organic substance catabolic process;cellular macromolecule catabolic process;cellular macromolecule metabolic process;proteasome-mediated ubiquitin-dependent protein catabolic process;organic substance metabolic process;ubiquitin-dependent protein catabolic process;proteolysis;prot…	4;6;5;4;5;4;7;3;8;5;6;2;7;1;5;2;6;3;5;3;4;6;7;3;4;	GO:0044445;GO:0005783;GO:0044464;GO:0019774;GO:0005789;GO:0042175;GO:0043229;GO:0031597;GO:0005623;GO:0005622;GO:0043227;GO:0005737;GO:0005839;GO:0044432;GO:0005634;GO:0016020;GO:0044444;GO:0043226;GO:0034515;GO:0098588;GO:0044446;GO:0000502;GO:0031090;GO:0043234;GO:0032991;GO:0043231;GO:0005829;GO:0005575;GO:0044424;GO:0044425;GO:0044422;GO:0012505;	cytosolic part;endoplasmic reticulum;cell part;proteasome core complex, beta-subunit complex;endoplasmic reticulum membrane;nuclear outer membrane-endoplasmic reticulum membrane network;intracellular organelle;cytosolic proteasome complex;cell;intracellular;membrane-bounded organelle;cytoplasm;proteasome core complex;endoplasmic reticulum part;nucleus;membrane;cytoplasmic part;organelle;proteasom…	5;4;2;4;3;3;3;5;2;3;3;4;4;4;5;2;4;2;6;4;3;4;3;3;2;4;5;1;3;2;2;3;	GO:0004175;GO:0003674;GO:0008233;GO:0070003;GO:0016787;GO:0003824;GO:0004298;GO:0070011;	endopeptidase activity;molecular_function;peptidase activity;threonine-type peptidase activity;hydrolase activity;catalytic activity;threonine-type endopeptidase activity;peptidase activity, acting on L-amino acid peptides;	6;1;4;6;3;2;7;5;	K02738	map03050;	Proteasome;	IPR023333;IPR001353;IPR029055;IPR035140;IPR016050;IPR000243;	Proteasome B-type subunit;Proteasome, subunit alpha/beta;Nucleophile aminohydrolases, N-terminal;Proteasome subunit beta 6;Proteasome beta-type subunit, conserved site;Peptidase T1A, proteasome beta-subunit;	mitochondria	YJL001w	322	O	[O] Posttranslational modification, protein turnover, chaperones;
T5A7D4	Uncharacterized protein OS=Ophiocordyceps sinensis (strain Co18 / CGMCC 3.14243) OX=911162 GN=OCS_02892 PE=4 SV=1	up	1.751	1.378	1.583	1.631	0.924	0.984	0.903	0.768	0.965	0.95	0.635	0.712	1.7723	0.000257434	1.09718	0.436886	1.94451	0.000515497										K09983			IPR034660;IPR018531;	DinB/YfiT-like putative metalloenzymes;Domain of unknown function DUF1993;	cytosol	91789265	119	S	[S] Function unknown;	COG3812	Uncharacterized protein
T5A9I0	Glycosyltransferase family 24 protein OS=Ophiocordyceps sinensis (strain Co18 / CGMCC 3.14243) OX=911162 GN=OCS_05212 PE=4 SV=1	up	1.276	1.388	nan	1.96	0.938	0.914	nan	0.76	0.942	0.779	nan	0.717	1.77029	0.0375872	1.07137	0.542554	1.89664	0.0305153	GO:0007165;GO:1901360;GO:0044710;GO:0006986;GO:0006011;GO:0044711;GO:0006073;GO:0006078;GO:0010033;GO:0046483;GO:0044700;GO:0030968;GO:0019538;GO:0016051;GO:0051788;GO:0034645;GO:0006807;GO:0043170;GO:0044267;GO:0044264;GO:0044262;GO:0044260;GO:0065007;GO:0071218;GO:0033554;GO:0009250;GO:0000271;GO:0051716;GO:0050794;GO:0006950;GO:0036211;GO:0008150;GO:0008152;GO:0044723;GO:0044042;GO:0033692;GO:…	signal transduction;organic cyclic compound metabolic process;single-organism metabolic process;response to unfolded protein;UDP-glucose metabolic process;single-organism biosynthetic process;cellular glucan metabolic process;(1->6)-beta-D-glucan biosynthetic process;response to organic substance;heterocycle metabolic process;single organism signaling;endoplasmic reticulum unfolded protein respon…	4;4;3;5;6;4;6;8;4;4;3;5;4;5;5;5;3;4;5;5;4;4;2;6;4;6;6;3;3;3;5;1;2;4;6;5;2;5;6;4;4;2;4;3;2;4;8;2;4;4;5;4;7;5;4;5;6;5;6;4;2;3;5;7;4;5;5;6;3;5;3;4;7;3;4;5;3;	GO:0005783;GO:0031974;GO:0005788;GO:0043231;GO:0043233;GO:0044424;GO:0044422;GO:0043229;GO:0043227;GO:0043226;GO:0044432;GO:0012505;GO:0044446;GO:0044444;GO:0005737;GO:0044464;GO:0005623;GO:0005622;GO:0005575;GO:0070013;	endoplasmic reticulum;membrane-enclosed lumen;endoplasmic reticulum lumen;intracellular membrane-bounded organelle;organelle lumen;intracellular part;organelle part;intracellular organelle;membrane-bounded organelle;organelle;endoplasmic reticulum part;endomembrane system;intracellular organelle part;cytoplasmic part;cytoplasm;cell part;cell;intracellular;cellular_component;intracellular organell…	4;2;5;4;3;3;2;3;3;2;4;3;3;4;4;2;2;3;1;4;	GO:0043169;GO:0016740;GO:0046872;GO:0003980;GO:0051787;GO:0016757;GO:0016758;GO:0003674;GO:0005488;GO:0046527;GO:0035251;GO:0003824;GO:0005537;GO:0048029;GO:0043167;GO:0005509;GO:0005515;GO:0030246;GO:0036094;GO:0008194;	cation binding;transferase activity;metal ion binding;UDP-glucose:glycoprotein glucosyltransferase activity;misfolded protein binding;transferase activity, transferring glycosyl groups;transferase activity, transferring hexosyl groups;molecular_function;binding;glucosyltransferase activity;UDP-glucosyltransferase activity;catalytic activity;mannose binding;monosaccharide binding;ion binding;calci…	4;3;5;7;4;4;5;1;2;6;6;2;5;4;3;6;3;3;3;5;	K11718	map04141;	Protein processing in endoplasmic reticulum;	IPR009448;IPR029044;	UDP-glucose:Glycoprotein Glucosyltransferase;Nucleotide-diphospho-sugar transferases;	plasma membrane	SPBPJ4664.06	831	G	[G] Carbohydrate transport and metabolism;
T5A9Q6	Trimeric LpxA-like protein OS=Ophiocordyceps sinensis (strain Co18 / CGMCC 3.14243) OX=911162 GN=OCS_04965 PE=4 SV=1	up	nan	1.497	nan	1.42	nan	0.757	nan	0.896	nan	0.847	nan	0.726	1.76466	0.015439	1.05086	0.706556	1.85442	0.0111968							GO:0016407;GO:0003824;GO:0016740;GO:0016746;GO:0016747;GO:0003674;	acetyltransferase activity;catalytic activity;transferase activity;transferase activity, transferring acyl groups;transferase activity, transferring acyl groups other than amino-acyl groups;molecular_function;	6;2;3;4;5;1;				IPR011004;IPR024688;IPR001451;	Trimeric LpxA-like;Maltose/galactoside acetyltransferase;Hexapeptide repeat;	cytosol	YJL218w	147	E	[E] Amino acid transport and metabolism;
T5AC57	Tubulin alpha chain OS=Ophiocordyceps sinensis (strain Co18 / CGMCC 3.14243) OX=911162 GN=OCS_04146 PE=3 SV=1	up	1.895	1.231	1.792	1.161	1.008	0.88	0.724	0.841	1.078	1.15	0.982	0.955	1.7605	0.0159278	0.82905	0.0522891	1.45954	0.0485994	GO:0044699;GO:0009987;GO:0044763;GO:0007017;GO:0008150;	single-organism process;cellular process;single-organism cellular process;microtubule-based process;biological_process;	2;2;3;4;1;	GO:0099512;GO:0099513;GO:0043229;GO:0043228;GO:0005874;GO:0043226;GO:0005737;GO:0044446;GO:0044430;GO:0015630;GO:0043232;GO:0005856;GO:0044464;GO:0005623;GO:0005622;GO:0005575;GO:0044424;GO:0044422;	supramolecular fiber;polymeric cytoskeletal fiber;intracellular organelle;non-membrane-bounded organelle;microtubule;organelle;cytoplasm;intracellular organelle part;cytoskeletal part;microtubule cytoskeleton;intracellular non-membrane-bounded organelle;cytoskeleton;cell part;cell;intracellular;cellular_component;intracellular part;organelle part;	2;3;3;3;4;2;4;3;4;6;4;5;2;2;3;1;3;2;	GO:0005200;GO:0035639;GO:1901363;GO:0003674;GO:0005488;GO:0001883;GO:0000166;GO:0001882;GO:0019001;GO:0005198;GO:0032561;GO:1901265;GO:0032549;GO:0017076;GO:0005525;GO:0016787;GO:0003924;GO:0017111;GO:0036094;GO:0003824;GO:0032555;GO:0016818;GO:0043167;GO:0097367;GO:0097159;GO:0016817;GO:0016462;GO:0032550;GO:0032553;GO:0043168;	structural constituent of cytoskeleton;purine ribonucleoside triphosphate binding;heterocyclic compound binding;molecular_function;binding;purine nucleoside binding;nucleotide binding;nucleoside binding;guanyl nucleotide binding;structural molecule activity;guanyl ribonucleotide binding;nucleoside phosphate binding;ribonucleoside binding;purine nucleotide binding;GTP binding;hydrolase activity;GT…	3;5;3;1;2;5;4;4;6;2;6;4;5;5;6;3;8;7;3;2;5;5;3;3;3;4;6;6;4;4;	K07374	map04145;map04210;map04540;map05130;	Phagosome;Apoptosis;Gap junction;Pathogenic Escherichia coli infection;	IPR008280;IPR000217;IPR018316;IPR002452;IPR017975;IPR003008;	Tubulin/FtsZ, C-terminal;Tubulin;Tubulin/FtsZ, 2-layer sandwich domain;Alpha tubulin;Tubulin, conserved site;Tubulin/FtsZ, GTPase domain;	cytosol	Hs17921989	654	Z	[Z] Cytoskeleton;
T5A7Z5	T-complex protein 1 subunit delta OS=Ophiocordyceps sinensis (strain Co18 / CGMCC 3.14243) OX=911162 GN=OCS_06422 PE=3 SV=1	up	1.824	1.392	1.906	1.218	0.821	0.955	0.868	0.963	0.81	0.826	0.695	0.885	1.75769	0.00694505	1.12158	0.112512	1.97139	0.00382601	GO:0022607;GO:0006457;GO:0070271;GO:0043933;GO:0016043;GO:0034622;GO:0071840;GO:0071822;GO:0065003;GO:0007021;GO:0009987;GO:0006461;GO:0008150;GO:0043623;GO:0044085;	cellular component assembly;protein folding;protein complex biogenesis;macromolecular complex subunit organization;cellular component organization;cellular macromolecular complex assembly;cellular component organization or biogenesis;protein complex subunit organization;macromolecular complex assembly;tubulin complex assembly;cellular process;protein complex assembly;biological_process;cellular p…	4;3;4;4;3;6;2;5;5;7;2;5;1;6;3;	GO:0043229;GO:0043228;GO:0043227;GO:0043226;GO:0005737;GO:0005634;GO:0005832;GO:0005856;GO:0043234;GO:0032991;GO:0043231;GO:0043232;GO:0005829;GO:0044464;GO:0005623;GO:0005622;GO:0005575;GO:0044444;GO:0044445;GO:0044424;	intracellular organelle;non-membrane-bounded organelle;membrane-bounded organelle;organelle;cytoplasm;nucleus;chaperonin-containing T-complex;cytoskeleton;protein complex;macromolecular complex;intracellular membrane-bounded organelle;intracellular non-membrane-bounded organelle;cytosol;cell part;cell;intracellular;cellular_component;cytoplasmic part;cytosolic part;intracellular part;	3;3;3;2;4;5;4;5;3;2;4;4;5;2;2;3;1;4;5;3;	GO:0005488;GO:1901363;GO:0003674;GO:0001883;GO:0032550;GO:0000166;GO:0001882;GO:0043167;GO:0035639;GO:1901265;GO:0032549;GO:0017076;GO:0005524;GO:0036094;GO:0032555;GO:0051082;GO:0030554;GO:0097367;GO:0097159;GO:0032559;GO:0005515;GO:0043168;GO:0032553;	binding;heterocyclic compound binding;molecular_function;purine nucleoside binding;purine ribonucleoside binding;nucleotide binding;nucleoside binding;ion binding;purine ribonucleoside triphosphate binding;nucleoside phosphate binding;ribonucleoside binding;purine nucleotide binding;ATP binding;small molecule binding;purine ribonucleotide binding;unfolded protein binding;adenyl nucleotide binding…	2;3;1;5;6;4;4;3;5;4;5;5;6;3;5;4;6;3;3;6;3;4;4;	K09496			IPR002423;IPR012717;IPR017998;IPR027409;IPR027413;IPR002194;	Chaperonin Cpn60/TCP-1 family;T-complex protein 1, delta subunit;Chaperone tailless complex polypeptide 1 (TCP-1);GroEL-like apical domain;GroEL-like equatorial domain;Chaperonin TCP-1, conserved site;	cytosol	SPBC106.06	742	O	[O] Posttranslational modification, protein turnover, chaperones;
T5A112	60S ribosomal protein L13 OS=Ophiocordyceps sinensis (strain Co18 / CGMCC 3.14243) OX=911162 GN=OCS_05200 PE=3 SV=1	up	1.157	1.414	2.082	1.35	0.81	0.871	0.797	0.943	0.953	1.072	0.902	1.14	1.75476	0.0194814	0.84116	0.0446269	1.47603	0.0593532	GO:1901564;GO:0044249;GO:0006807;GO:0044237;GO:0034645;GO:1901576;GO:0044260;GO:0043043;GO:0071704;GO:0010467;GO:1901566;GO:0043170;GO:0044267;GO:0009987;GO:0009058;GO:0009059;GO:0008150;GO:0008152;GO:0044271;GO:0043604;GO:0044238;GO:0019538;GO:0034641;GO:0043603;GO:0006518;GO:0006412;	organonitrogen compound metabolic process;cellular biosynthetic process;nitrogen compound metabolic process;cellular metabolic process;cellular macromolecule biosynthetic process;organic substance biosynthetic process;cellular macromolecule metabolic process;peptide biosynthetic process;organic substance metabolic process;gene expression;organonitrogen compound biosynthetic process;macromolecule …	4;4;3;3;5;4;4;6;3;5;5;4;5;2;3;5;1;2;5;6;3;4;4;5;5;6;	GO:0044464;GO:0043229;GO:0030529;GO:0043226;GO:0005737;GO:0032991;GO:0005840;GO:0043232;GO:1990904;GO:0005623;GO:0005622;GO:0005575;GO:0044444;GO:0043228;GO:0044424;	cell part;intracellular organelle;intracellular ribonucleoprotein complex;organelle;cytoplasm;macromolecular complex;ribosome;intracellular non-membrane-bounded organelle;ribonucleoprotein complex;cell;intracellular;cellular_component;cytoplasmic part;non-membrane-bounded organelle;intracellular part;	2;3;4;2;4;2;5;4;3;2;3;1;4;3;3;	GO:0003674;GO:0005198;GO:0003735;	molecular_function;structural molecule activity;structural constituent of ribosome;	1;2;3;	K02873	map03010;	Ribosome;	IPR018256;IPR001380;IPR034295;	Ribosomal protein L13e, conserved site;Ribosomal protein L13e;Ribosomal protein L13, eukaryotic;	nucleus	SPAC664.05	183	J	[J] Translation, ribosomal structure and biogenesis;
T5AA19	Peptidase M24, structural domain protein OS=Ophiocordyceps sinensis (strain Co18 / CGMCC 3.14243) OX=911162 GN=OCS_01969 PE=3 SV=1	up	1.725	1.216	1.435	1.24	0.748	0.784	0.742	0.929	0.842	0.838	0.657	0.753	1.75337	0.00298786	1.03657	0.663577	1.81748	0.00237841							GO:0004177;GO:0046872;GO:0046914;GO:0016787;GO:0008238;GO:0043169;GO:0030145;GO:0003824;GO:0070011;GO:0003674;GO:0005488;GO:0008233;GO:0043167;GO:0008237;	aminopeptidase activity;metal ion binding;transition metal ion binding;hydrolase activity;exopeptidase activity;cation binding;manganese ion binding;catalytic activity;peptidase activity, acting on L-amino acid peptides;molecular_function;binding;peptidase activity;ion binding;metallopeptidase activity;	7;5;6;3;6;4;7;2;5;1;2;4;3;6;	K14213			IPR000994;IPR028980;IPR029149;IPR007865;	Peptidase M24;Creatinase/Aminopeptidase P, N-terminal;Creatinase/Aminopeptidase P/Spt16, N-terminal;Aminopeptidase P, N-terminal;	cytosol	YFR006w	350	R	[R] General function prediction only;
[truncated: 244 more rows]

## Sheet: Sheet2
Table S2-2 DAPs in the comparison of PR vs. MF
Protein	Description	Regulated-Stage	ST_1	ST_2	ST_3	ST_4	PR_1	PR_2	PR_3	PR_4	MF_1	MF_2	MF_3	MF_4	ST-vs-PR	ST-vs-PR-p	PR-vs-MF	PR-vs-MF-p	ST-vs-MF	ST-vs-MF-p	BP_GO_ID	BP_GO_Desc	BP_GO_Level	CC_GO_ID	CC_GO_Desc	CC_GO_Level	MF_GO_ID	MF_GO_Desc	MF_GO_Level	KEGG_KO	KEGG_Pathway_ID	KEGG_Pathway_Desc	Domain_ID	Domain_Desc	SubcellurLocation	COG_Gene	BlastScore	COG_Code	COG_Desc
T5A5M3	Serine proteinase OS=Ophiocordyceps sinensis (strain Co18 / CGMCC 3.14243) OX=911162 GN=OCS_06602 PE=4 SV=1	Up	0.691	1.073	0.392	nan	2.349	1.792	2.227	nan	0.479	0.437	0.729	nan	0.338568	0.00566401	3.87112	0.00120644	1.31064	0.476614															extracellular
[truncated: 172 more rows]

## Sheet: Sheet3
Table S2-3 DAPs in the comparison of ST vs. MF
Protein	Description	Regulated-Stage	ST_1	ST_2	ST_3	ST_4	PR_1	PR_2	PR_3	PR_4	MF_1	MF_2	MF_3	MF_4	ST-vs-PR	ST-vs-PR-p	PR-vs-MF	PR-vs-MF-p	ST-vs-MF	ST-vs-MF-p	BP_GO_ID	BP_GO_Desc	BP_GO_Level	CC_GO_ID	CC_GO_Desc	CC_GO_Level	MF_GO_ID	MF_GO_Desc	MF_GO_Level	KEGG_KO	KEGG_Pathway_ID	KEGG_Pathway_Desc	Domain_ID	Domain_Desc	SubcellurLocation	COG_Gene	BlastScore	COG_Code	COG_Desc
T4ZYW5	Blastomyces-phase-specific protein OS=Ophiocordyceps sinensis (strain Co18 / CGMCC 3.14243) OX=911162 GN=OCS_05951 PE=4 SV=1	Up	nan	3.836	4.32	nan	nan	0.221	0.22	nan	nan	0.262	0.225	nan	18.4945	0.00391261	0.90554	0.339887	16.7474	0.00398239													IPR006771;	Blastomyces yeast-phase-specific protein;	extracellular
[truncated: 513 more rows]
