# Supplementary material for: iTRAQ-based comparative proteome analyses of different growth stages revealing the regulatory role of reactive oxygen species in the fruiting body development of Ophiocordyceps sinensis
Source: PeerJ. 2021 Mar 3;9:e10940. doi: 10.7717/peerj.10940 (PMC7936569; doi:10.7717/peerj.10940)
Supplement: Table S3 [file peerj-09-10940-s006.xlsx]

## Sheet: Sheet1
The shared DEPs among all the comparisons between these stages
T5AEU2
T5A9T9
T5AJT4
T5ALD5
T5ADK7
T5AFU2
T5ACF2
T5AHW7
T4ZZF7
T5AM05
T5AQC4
T5A7F7
T5AIM3
T5AFE3
T5ADW2
T5AKM0
T5AAF6
T5AHU0
T5ABX3
T5AKL3
T5AE42
T5AIY6
T5A220
T5A413
T5ACM3
T5A5Z0
T5AI63
T5AII3
T5A598
T5A826
T5AFK0
T5AF00
T5AAB8
T5AKZ0
T5AKZ2
T5AIZ6
T5A5J7
T5A7X9
T5ADC3
T5A6G0
T5APH5
T5ACN6
T5AQT4
T5AIJ9
T5A6X3
T5AKF5
T5ANI2
T5AQE3
T5ANR4
T5AHR2
T5AND3
T5AIG0
T5ADA9
T5ALK0
T5A8Z4
T5AKV5
T5AKV2
T5ADL3
T5AKU5
T5AIS0
T5AHM3
T5A212
