# Supplementary material for: iTRAQ-based comparative proteome analyses of different growth stages revealing the regulatory role of reactive oxygen species in the fruiting body development of Ophiocordyceps sinensis
Source: PeerJ. 2021 Mar 3;9:e10940. doi: 10.7717/peerj.10940 (PMC7936569; doi:10.7717/peerj.10940)
Supplement: Table S4 [file peerj-09-10940-s007.xlsx]

## Sheet: Sheet1
Table S3. The most enriched GO of Differentially accumulated proteins (DAPs) in the comparisons between different stages (P<0.005)
Sheet1. the most enriched GO terms of DAPs in the comparison of ST vs. PR
Category_ID	Category_Name	Diffmapping	ProteinMapping	DiffNum	ProteinNum	FoldEnrichment	Fisher's exact test p value	Mapping ProteinIDs
the most enriched GO-Biological process of DAPs in ST vs. PR
GO:0043603	cellular amide metabolic process	65	168	337	1211	1.39033	0.000654552	T5A7B9;T5AEK1;T5ADJ4;T5AIX5;T5AFX7;T5A851;T5A9K8;T5APL2;T5A6E8;T5ADS5;T5AEK6;T5A8V0;T5AJR1;T5ACK0;T5ANC4;T5AF61;T5AAR8;T5AAZ4;T5A4Z5;T5AI61;T5AKH0;T5A8W0;T5AJS1;T5AG73;T5AG48;T5AC46;T5ABJ0;T5AIT8;T5APU7;T5AAL4;T5A112;T5ALA0;T5AFD9;T5A2X4;T5ACI0;T5A948;T5ADL3;T5ANN8;T5AA04;T5ADI9;T5A7Q8;T4ZYY1;T5AEQ0;T5ANG8;T5AKM2;T5AB37;T5AFN2;T4ZZ30;T5AMX3;T5ACE4;T5AQ94;T5AN30;T5AAF6;T5A6C3;T5A7V8;T5AKL3;T5AFI0;…
GO:0006518	peptide metabolic process	60	153	337	1211	1.4092	0.000726682	T5A7B9;T5AEK1;T5ADJ4;T5APU7;T5AIX5;T5AFX7;T5A851;T5A9K8;T5A6E8;T5ADS5;T5AEK6;T5A8V0;T5AJR1;T5ACK0;T5ANC4;T5AF61;T5AAR8;T5AAZ4;T5AI61;T5AKH0;T5A8W0;T5AJS1;T5AG73;T5AG48;T5ABJ0;T5AIT8;T5A112;T5ALA0;T5AFD9;T5A2X4;T5ACI0;T5A948;T5ANN8;T5ADI9;T5A7Q8;T4ZYY1;T5AEQ0;T5ANG8;T5A4Z5;T5AKM2;T5AB37;T5AFN2;T4ZZ30;T5AMX3;T5ACE4;T5AQ94;T5AN30;T5AAF6;T5A6C3;T5A7V8;T5AKL3;T5AFI0;T5A7K4;T5A7K2;T5AEQ2;T5A8P8;T5AMC7;…
GO:0043043	peptide biosynthetic process	57	146	337	1211	1.40293	0.001153	T5A7B9;T5AEK1;T5ADJ4;T5APU7;T5AIX5;T5AFX7;T5A9K8;T5A6E8;T5ADS5;T5AEK6;T5A8V0;T5AJR1;T5ACK0;T5ANC4;T5AF61;T5AAR8;T5AAZ4;T5AI61;T5AKH0;T5A8W0;T5AJS1;T5AG73;T5ABJ0;T5AIT8;T5A112;T5ALA0;T5AFD9;T5A2X4;T5ACI0;T5A948;T5ANN8;T5ADI9;T5A7Q8;T5AEQ0;T5ANG8;T5A4Z5;T5AG48;T5AB37;T5AFN2;T4ZZ30;T5AMX3;T5ACE4;T5AQ94;T5AN30;T5AAF6;T5A6C3;T5A7V8;T5AKL3;T5AFI0;T5A7K4;T5A7K2;T5AEQ2;T5A8P8;T5AMC7;T5AHD5;T5APC3;T5AA54
GO:0006412	translation	56	143	337	1211	1.40723	0.00117406	T5A7B9;T5AEK1;T5ADJ4;T5APU7;T5AIX5;T5AFX7;T5A9K8;T5A6E8;T5ADS5;T5AEK6;T5A8V0;T5AJR1;T5AIT8;T5ACK0;T5ANC4;T5AF61;T5AAR8;T5AAZ4;T5AI61;T5AKH0;T5A8W0;T5AJS1;T5AG73;T5ABJ0;T5A112;T5ALA0;T5A2X4;T5ACI0;T5A948;T5ANN8;T5ADI9;T5A7Q8;T5AEQ0;T5ANG8;T5A4Z5;T5AG48;T5AB37;T5AFN2;T4ZZ30;T5AMX3;T5ACE4;T5AQ94;T5AN30;T5AAF6;T5A6C3;T5A7V8;T5AKL3;T5AFI0;T5A7K4;T5A7K2;T5AEQ2;T5A8P8;T5AMC7;T5AHD5;T5APC3;T5AA54
GO:0043604	amide biosynthetic process	59	153	337	1211	1.38572	0.00134821	T5A7B9;T5AEK1;T5ADJ4;T5APU7;T5AIX5;T5AFX7;T5A9K8;T5A6E8;T5ADS5;T5AEK6;T5A8V0;T5AJR1;T5ACK0;T5ANC4;T5AF61;T5AAR8;T5AAZ4;T5A4Z5;T5AI61;T5AKH0;T5A8W0;T5AJS1;T5AG73;T5AC46;T5ABJ0;T5AIT8;T5A112;T5ALA0;T5AFD9;T5A2X4;T5ACI0;T5A948;T5ADL3;T5ANN8;T5ADI9;T5A7Q8;T5AEQ0;T5ANG8;T5AG48;T5AB37;T5AFN2;T4ZZ30;T5AMX3;T5ACE4;T5AQ94;T5AN30;T5AAF6;T5A6C3;T5A7V8;T5AKL3;T5AFI0;T5A7K4;T5A7K2;T5AEQ2;T5A8P8;T5AMC7;T5AHD5;…
GO:0015833	peptide transport	6	7	337	1211	3.08012	0.00240642	T5AA66;T4ZYG3;T5A9T9;T5ANI2;T5ALD5;T5A6V3
GO:0042886	amide transport	6	7	337	1211	3.08012	0.00240642	T5AA66;T4ZYG3;T5A9T9;T5ANI2;T5ALD5;T5A6V3
GO:0009205	purine ribonucleoside triphosphate metabolic process	17	34	337	1211	1.79674	0.00446879	T4ZWD4;T5AFE3;T5ALL5;T5AM98;T5ADZ3;T5A9X1;T5AAQ3;T5AQL2;T5ANU3;T5A9E5;T5APV7;T5AQZ0;T5AFQ7;T5AQ35;T5AKX9;T5AE78;T5AAY0
GO:0009199	ribonucleoside triphosphate metabolic process	17	34	337	1211	1.79674	0.00446879	T4ZWD4;T5AFE3;T5ALL5;T5AM98;T5ADZ3;T5A9X1;T5AAQ3;T5AQL2;T5ANU3;T5A9E5;T5APV7;T5AQZ0;T5AFQ7;T5AQ35;T5AKX9;T5AE78;T5AAY0
the most enriched GO-Cellular component of DAPs in ST vs. PR
GO:0000786	nucleosome	5	5	335	1213	3.6209	0.00157211	T5A826;T5AKK2;T5AA47;T5A212;T5A8E7
GO:0098798	mitochondrial protein complex	14	25	335	1213	2.0277	0.00235804	T5AB50;T5AEI3;T4ZWD4;T5ACE8;T5AFV3;T5ADZ3;T5APV7;T5AHV3;T5A7I9;T5AQZ0;T5A7X9;T5A9E5;T5AQ35;T5AE78
GO:0032993	protein-DNA complex	7	9	335	1213	2.81625	0.00245038	T5A826;T5A8E7;T5ACN6;T5AKK2;T5AN24;T5AA47;T5A212
the most enriched GO-Molecular functionof DAPs in ST vs. PR
GO:0005198	structural molecule activity	38	94	339	1208	1.44053	0.00482902	T5A7B9;T5AEK1;T5ADJ4;T5A9K8;T5A6E8;T5AEK6;T5ACK0;T5ANC4;T5AF61;T5AC57;T5AI61;T5AJS1;T5AG73;T5ABJ0;T5AIT8;T5AQ41;T5ACY1;T5ALA0;T5A2X4;T5A948;T5ANN8;T5ANG8;T5AB37;T5AFN2;T4ZZ30;T5AEI3;T5AMC7;T5AQ94;T5A8S5;T5ALL2;T5AN30;T5AFX7;T5AKL3;T5A112;T5A7K2;T5AEQ2;T5AEQ0;T5AA54

## Sheet: Sheet2
Sheet2. the most enriched GO terms of DAPs in the comparison of PR vs. MF
Category_ID	Category_Name	Diffmapping	ProteinMapping	DiffNum	ProteinNum	FoldEnrichment	Fisher's exact test p value	Mapping ProteinIDs
GO-Biological process
GO:0006457	protein folding	15	53	104	1211	3.29554	1.51e-05	T5A5J7;T5A0N1;T5A954;T5AK78;T5AEC8;T5ANN7;T5AII3;T5A6G0;T5A918;T5ALS5;T5AIY6;T5AQC8;T5AGQ6;T5A9N6;T5AKV0
GO:0006979	response to oxidative stress	10	36	104	1211	3.23451	0.000539975	T5AA62;T5AL96;T5AF35;T4ZZN0;T5AJH5;T5A918;T5A5N4;T5A9T9;T5A9V1;T5A924
GO:0070887	cellular response to chemical stimulus	14	65	104	1211	2.50799	0.000737044	T5A5J7;T5AHB4;T5ADW2;T5AF35;T5AA66;T5AJH5;T5A918;T5AA62;T5ABX3;T5A7X9;T5A9T9;T5A9V1;T5ANI2;T5A924
GO:0015833	peptide transport	4	7	104	1211	6.65385	0.00146994	T5AA66;T5A9T9;T5ANI2;T5ALD5
GO:0042886	amide transport	4	7	104	1211	6.65385	0.00146994	T5AA66;T5A9T9;T5ANI2;T5ALD5
GO:0032880	regulation of protein localization	5	12	104	1211	4.85176	0.00206512	T5A7X9;T5ANI2;T5AKF5;T5A9T9;T5AC84
GO:1903827	regulation of cellular protein localization	4	8	104	1211	5.82212	0.00274639	T5A7X9;T5AKF5;T5A9T9;T5ANI2
GO:1990748	cellular detoxification	5	13	104	1211	4.47855	0.00312869	T5AA66;T5A9T9;T5A9V1;T5AL96;T5AJH5
GO:0006950	response to stress	22	144	104	1211	1.77898	0.00336263	T5AL96;T5AIZ6;T5AN58;T5ALS5;T5AEC8;T5AA66;T5AA62;T5A954;T5A7X9;T5A9T9;T5A924;T4ZZN0;T5ACN6;T5A5N4;T5A9V1;T5A5J7;T5AK78;T5AII3;T5AF35;T5AJH5;T5A918;T5A212
GO:0034599	cellular response to oxidative stress	7	25	104	1211	3.26038	0.00370288	T5AA62;T5AF35;T5AJH5;T5A918;T5A9T9;T5A9V1;T5A924
GO:0098754	detoxification	5	14	104	1211	4.15865	0.00453799	T5AA66;T5A9T9;T5A9V1;T5AL96;T5AJH5
GO:0098869	cellular oxidant detoxification	4	9	104	1211	5.17521	0.00461894	T5A9T9;T5AL96;T5A9V1;T5AJH5
GO-Cellular component
GO:0000786	nucleosome	4	5	103	1213	9.42136	0.00023015	T5A826;T5AA47;T5A212;T5A8E7
GO:0032993	protein-DNA complex	5	9	103	1213	6.54261	0.000384334	T5A826;T5A8E7;T5ACN6;T5AA47;T5A212
GO:0044815	DNA packaging complex	4	8	103	1213	5.88835	0.00263197	T5A826;T5A8E7;T5AA47;T5A212
GO-Molecular function
GO:0016209	antioxidant activity	7	20	118	1208	3.58305	0.00187546	T5AL96;T5A9T9;T5A9V1;T5A6F1;T5AE75;T5A5N4;T5AJH5

## Sheet: Sheet3
Sheet3. the most enriched GO terms of DAPs in the comparison of ST vs. MF
The most enriched GO-BP of DEPs in ST vs. MF (P<0.005)
GO:0006518	peptide metabolic process	60	153	334	1211	1.42186	0.000555581	T5A7B9;T5AEK1;T5AD62;T5ADJ4;T5APU7;T5AIX5;T5AFX7;T5A851;T5A9K8;T5A6E8;T5ADS5;T5AEK6;T5AJR1;T5ACK0;T5ANC4;T5AF61;T5AAR8;T5AAZ4;T5AI61;T5AKH0;T5A8W0;T5AJS1;T5AG73;T5AG48;T5ABJ0;T5AIT8;T5AJ04;T5AJJ7;T5AFD9;T5A2X4;T5AG69;T5ACI0;T5A948;T5ANN8;T5ADI9;T5A7Q8;T4ZYY1;T5AEQ0;T5ANG8;T5A4Z5;T5AKM2;T5AB37;T5AFN2;T4ZZ30;T5AMX3;T5ACE4;T5AQ94;T5AFG7;T5AN30;T5AAF6;T5A6C3;T5A7V8;T5AKL3;T5AFI0;T5A7K4;T5A8P8;T5AMC7;…
GO:0043603	cellular amide metabolic process	63	168	334	1211	1.35966	0.00163712	T5A7B9;T5AEK1;T5AD62;T5ADJ4;T5AIX5;T5AFX7;T5A851;T5A9K8;T5A6E8;T5ADS5;T5AEK6;T5AJR1;T5ACK0;T5ANC4;T5AF61;T5AAR8;T5AAZ4;T5A4Z5;T5AI61;T5AKH0;T5A8W0;T5AJS1;T5AG73;T5AG48;T5AC46;T5ABJ0;T5AIT8;T5APU7;T5AJ04;T5AAL4;T5AJJ7;T5AFD9;T5A2X4;T5AG69;T5ACI0;T5A948;T5ADL3;T5ANN8;T5ADI9;T5A7Q8;T4ZYY1;T5AEQ0;T5ANG8;T5AKM2;T5AB37;T5AFN2;T4ZZ30;T5AMX3;T5ACE4;T5AQ94;T5AFG7;T5AN30;T5AAF6;T5A6C3;T5A7V8;T5AKL3;T5AFI0;…
GO:0043043	peptide biosynthetic process	56	146	334	1211	1.3907	0.00166727	T5A7B9;T5AEK1;T5ADJ4;T5APU7;T5AIX5;T5AFX7;T5A9K8;T5A6E8;T5ADS5;T5AEK6;T5AJR1;T5ACK0;T5ANC4;T5AF61;T5AAR8;T5AAZ4;T5AI61;T5AKH0;T5A8W0;T5AJS1;T5AG73;T5ABJ0;T5AIT8;T5AJ04;T5AJJ7;T5AFD9;T5A2X4;T5AG69;T5ACI0;T5A948;T5ANN8;T5ADI9;T5A7Q8;T5AEQ0;T5ANG8;T5A4Z5;T5AG48;T5AB37;T5AFN2;T4ZZ30;T5AMX3;T5ACE4;T5AQ94;T5AFG7;T5AN30;T5AAF6;T5A6C3;T5A7V8;T5AKL3;T5AFI0;T5A7K4;T5A8P8;T5AMC7;T5AHD5;T5APC3;T5AA54
GO:0006412	translation	55	143	334	1211	1.39452	0.00171014	T5A7B9;T5AEK1;T5ADJ4;T5APU7;T5AIX5;T5AFX7;T5A9K8;T5A6E8;T5ADS5;T5AEK6;T5AJR1;T5AIT8;T5ACK0;T5ANC4;T5AF61;T5AAR8;T5AAZ4;T5AI61;T5AKH0;T5A8W0;T5AJS1;T5AG73;T5ABJ0;T5AJ04;T5AJJ7;T5A2X4;T5AG69;T5ACI0;T5A948;T5ANN8;T5ADI9;T5A7Q8;T5AEQ0;T5ANG8;T5A4Z5;T5AG48;T5AB37;T5AFN2;T4ZZ30;T5AMX3;T5ACE4;T5AQ94;T5AFG7;T5AN30;T5AAF6;T5A6C3;T5A7V8;T5AKL3;T5AFI0;T5A7K4;T5A8P8;T5AMC7;T5AHD5;T5APC3;T5AA54
GO:0043604	amide biosynthetic process	58	153	334	1211	1.37447	0.00190759	T5A7B9;T5AEK1;T5ADJ4;T5APU7;T5AIX5;T5AFX7;T5A9K8;T5A6E8;T5ADS5;T5AEK6;T5AJR1;T5ACK0;T5ANC4;T5AF61;T5AAR8;T5AAZ4;T5A4Z5;T5AI61;T5AKH0;T5A8W0;T5AJS1;T5AG73;T5AC46;T5ABJ0;T5AIT8;T5AJ04;T5AJJ7;T5AFD9;T5A2X4;T5AG69;T5ACI0;T5A948;T5ADL3;T5ANN8;T5ADI9;T5A7Q8;T5AEQ0;T5ANG8;T5AG48;T5AB37;T5AFN2;T4ZZ30;T5AMX3;T5ACE4;T5AQ94;T5AFG7;T5AN30;T5AAF6;T5A6C3;T5A7V8;T5AKL3;T5AFI0;T5A7K4;T5A8P8;T5AMC7;T5AHD5;T5APC3;…
GO:0006091	generation of precursor metabolites and energy	23	50	334	1211	1.66784	0.00341184	T5A686;T5AAV3;T5AB17;T4ZWD4;T5AFE3;T5ADX9;T5AJS5;T5AEM1;T5ACL3;T5AHV3;T5A9X1;T5AAQ3;T5ADX0;T5A5Y2;T5A9E5;T5A1Y7;T5AQZ0;T5AES6;T5A666;T5A7X2;T5A486;T5AQ35;T5AFQ7
GO:0019538	protein metabolic process	106	317	334	1211	1.2124	0.00444757	T5A7B9;T5A3K5;T5AEK1;T5A7B3;T5AKB3;T5APU7;T5AIZ6;T5AC88;T5AGR2;T5A6G8;T5A9K8;T5A6E8;T4ZYY1;T5A611;T5AB02;T4ZZL9;T5AD63;T5ADJ4;T5ADS6;T5AJR5;T5AJR1;T5AIT8;T5ACK0;T5AQ35;T5ANC4;T5AAC0;T5AF61;T5AAR8;T5AF08;T5AE86;T5AFI6;T5AK78;T5AAZ4;T5AP96;T5ADW2;T5AI61;T5AKH0;T5ADX0;T5A8W0;T5AJS1;T5AG73;T4ZZP9;T5ABJ0;T5AJ04;T5AJJ7;T5AA86;T5A8T1;T5A7R7;T5A7X9;T5AL48;T5A9T9;T5ARC0;T5A2X4;T5AHQ7;T5AEK6;T5ACI0;T5AHF1;…
The most enriched GO-CC of DAPs in ST vs. MF (P<0.005)
Category_ID	Category_Name	Diffmapping	ProteinMapping	DiffNum	ProteinNum	FoldEnrichment	Fisher's exact test p value	Mapping ProteinIDs
GO:0098798	mitochondrial protein complex	15	25	336	1213	2.16607	0.000630657	T5AB50;T5AEI3;T4ZWD4;T5ACE8;T5AFV3;T5ADZ3;T5APV7;T5AHV3;T5A7I9;T5AQZ0;T5A7X9;T5A486;T5A9E5;T5AQ35;T5AE78
GO:0044445	cytosolic part	31	69	336	1213	1.62194	0.00120028	T5A7B9;T5AE86;T5ADJ4;T5AFF1;T5ANN8;T5ANN7;T5AQ94;T5A2X4;T5AFG8;T5AJS1;T5AN30;T5AG73;T5A9K8;T5A7G4;T5A6G0;T5AKL3;T5AJ04;T5ABJ0;T5AEK6;T5A6E8;T5AA86;T5A7Z5;T5AJJ7;T5AEQ0;T5AMC7;T5AFX7;T5AB37;T5AFN2;T5AJR5;T5AA54;T5ANC4
GO:0044455	mitochondrial membrane part	14	24	336	1213	2.1059	0.00142375	T5AB50;T5AH87;T5ACE8;T5AFV3;T5ADZ3;T5APV7;T5A7I9;T5AQZ0;T5A7X9;T5A9V1;T5A486;T5A9E5;T5AQ35;T5AE78
GO:0005576	extracellular region	36	88	336	1213	1.47687	0.00377871	T5AB71;T5AJB2;T5ADK9;T5ACS8;T5AES6;T5AJR6;T5AK75;T5ADC3;T5AE75;T5ADX9;T5AE63;T5APB8;T5AIM3;T4ZZF7;T5ACQ1;T5AMT5;T5A9T9;T5API4;T5AAG4;T5AP68;T5AM05;T5ABU4;T5A668;T4ZXQ6;T5AKM7;T5AG46;T5AEI8;T5A7H8;T5A8H7;T5ACE9;T5A9C7;T5A9X9;T5A8X3;T5A8A1;T5AHU3;T5ANI2
GO:0098800	inner mitochondrial membrane protein complex	9	14	336	1213	2.32079	0.00441489	T5AQZ0;T5AE78;T5A486;T5A9E5;T5APV7;T5A7I9;T5ADZ3;T5ACE8;T5AQ35
