# Supplementary material for: iTRAQ-based comparative proteome analyses of different growth stages revealing the regulatory role of reactive oxygen species in the fruiting body development of Ophiocordyceps sinensis
Source: PeerJ. 2021 Mar 3;9:e10940. doi: 10.7717/peerj.10940 (PMC7936569; doi:10.7717/peerj.10940)
Supplement: Table S8 [file peerj-09-10940-s010.xlsx]

## Sheet: Sheet1
Table S8 -1The oxidation−reduction related DAPs among the all comparisons.
Protein	Description	ST_1	PR_1	MF_1	ST_2	PR_2	MF_2	ST_3	PR_3	MF_3	ST_4	PR_4	MF_4	ST vs. PR	ST-vs-PR-p	PR-vs-MF	PR-vs-MF-p	ST-vs-MF	ST-vs-MF-p	BP_GO_ID	BP_GO_Desc	BP_GO_Level	CC_GO_ID	CC_GO_Desc	CC_GO_Level	MF_GO_ID	MF_GO_Desc	MF_GO_Level	KEGG_KO	KEGG_Pathway_ID	KEGG_Pathway_Desc	Domain_ID	Domain_Desc	SubcellurLocation	COG_Gene	BlastScore	COG_Code	COG_Desc
T5AHD1	Electron transport protein OS=Ophiocordyceps sinensis (strain Co18 / CGMCC 3.14243) OX=911162 GN=OCS_03142 PE=4 SV=1	0.535	1.252	1.017	nan	nan	nan	nan	nan	nan	0.63	1.187	1.591	0.477655	0.00806489	0.9352	0.797421	0.4467	0.131298	GO:0055070;GO:0055076;GO:0098771;GO:0071840;GO:0098869;GO:0019725;GO:1990748;GO:0048878;GO:0022607;GO:0006825;GO:0017004;GO:0098754;GO:0051775;GO:0046916;GO:0016043;GO:0065003;GO:0065007;GO:0065008;GO:0006812;GO:0006811;GO:0006810;GO:0008150;GO:0051234;GO:0050896;GO:0070271;GO:0050801;GO:0044699;GO:0000041;GO:0006878;GO:0006875;GO:0009987;GO:0006873;GO:0030001;GO:0030003;GO:0055080;GO:0055082;GO:…	copper ion homeostasis;transition metal ion homeostasis;inorganic ion homeostasis;cellular component organization or biogenesis;cellular oxidant detoxification;cellular homeostasis;cellular detoxification;chemical homeostasis;cellular component assembly;copper ion transport;cytochrome complex assembly;detoxification;response to redox state;cellular transition metal ion homeostasis;cellular compon…	10;9;7;2;4;4;3;5;4;9;7;2;3;9;3;5;2;3;6;5;4;1;3;2;4;6;2;8;10;8;2;6;7;7;7;5;8;4;4;6;5;4;5;4;3;8;3;6;2;3;3;	GO:0031975;GO:0016021;GO:0016020;GO:0031967;GO:0031966;GO:0043231;GO:0044429;GO:0044424;GO:0044425;GO:0044422;GO:0044464;GO:0043229;GO:0043227;GO:0043226;GO:0031224;GO:0044446;GO:0044444;GO:0005737;GO:0031090;GO:0005739;GO:0019866;GO:0005623;GO:0005743;GO:0005740;GO:0005622;GO:0005575;	envelope;integral component of membrane;membrane;organelle envelope;mitochondrial membrane;intracellular membrane-bounded organelle;mitochondrial part;intracellular part;membrane part;organelle part;cell part;intracellular organelle;membrane-bounded organelle;organelle;intrinsic component of membrane;intracellular organelle part;cytoplasmic part;cytoplasm;organelle membrane;mitochondrion;organell…	3;4;2;4;4;4;4;3;2;2;2;3;3;2;3;3;4;4;3;5;4;2;5;5;3;1;	GO:0008379;GO:0046872;GO:0016209;GO:0016684;GO:0003674;GO:0005488;GO:0046914;GO:0003824;GO:0004601;GO:0016491;GO:0043169;GO:0043167;GO:0005507;GO:0051920;	thioredoxin peroxidase activity;metal ion binding;antioxidant activity;oxidoreductase activity, acting on peroxide as acceptor;molecular_function;binding;transition metal ion binding;catalytic activity;peroxidase activity;oxidoreductase activity;cation binding;ion binding;copper ion binding;peroxiredoxin activity;	4;5;2;4;1;2;6;2;3;3;4;3;7;3;	K07152			IPR003782;IPR017276;IPR012336;	Copper chaperone SCO1/SenC;Synthesis of cytochrome c oxidase, Sco1/Sco2;Thioredoxin-like fold;	mitochondria	YBR037c	251	C	[C] Energy production and conversion;
T5A924	Histidine phosphotransferase OS=Ophiocordyceps sinensis (strain Co18 / CGMCC 3.14243) OX=911162 GN=OCS_06055 PE=4 SV=1	0.862	1.154	0.99	nan	nan	nan	0.86	1.379	0.915	0.721	1.352	0.995	0.628828	0.0047995	1.33966	0.0121694	0.84241	0.0461765	GO:0019220;GO:0080090;GO:0019222;GO:0000086;GO:0048584;GO:0048583;GO:0007165;GO:0023014;GO:0051716;GO:0045786;GO:0010604;GO:0009966;GO:0000160;GO:0000165;GO:0048518;GO:0048519;GO:0060255;GO:0010972;GO:0042221;GO:0042325;GO:0044700;GO:0042327;GO:0019538;GO:0033554;GO:1901991;GO:0009893;GO:0035556;GO:0043170;GO:0050789;GO:0044267;GO:0007346;GO:0044260;GO:0007234;GO:0007231;GO:0065007;GO:0007049;GO:…	regulation of phosphate metabolic process;regulation of primary metabolic process;regulation of metabolic process;G2/M transition of mitotic cell cycle;positive regulation of response to stimulus;regulation of response to stimulus;signal transduction;signal transduction by protein phosphorylation;cellular response to stimulus;negative regulation of cell cycle;positive regulation of macromolecule …	6;4;3;6;3;3;4;4;3;4;4;4;6;5;2;2;4;7;3;7;3;7;4;4;6;3;5;4;2;5;5;4;6;5;2;4;4;3;3;6;3;5;1;2;5;5;6;6;2;6;5;4;5;6;5;3;2;6;4;3;4;4;2;6;5;5;5;5;5;6;3;5;2;6;6;4;7;4;5;5;4;4;6;4;4;5;5;6;4;3;7;5;7;5;6;6;5;6;3;4;5;7;3;4;3;5;7;4;7;7;3;3;	GO:0043231;GO:0005829;GO:0044424;GO:0043229;GO:0043227;GO:0044444;GO:0005634;GO:0005737;GO:0044464;GO:0005623;GO:0005622;GO:0043226;GO:0005575;	intracellular membrane-bounded organelle;cytosol;intracellular part;intracellular organelle;membrane-bounded organelle;cytoplasmic part;nucleus;cytoplasm;cell part;cell;intracellular;organelle;cellular_component;	4;5;3;3;3;4;5;4;2;2;3;2;1;	GO:0016740;GO:0003674;GO:0016301;GO:0003824;GO:0016772;GO:0009927;GO:0004871;	transferase activity;molecular_function;kinase activity;catalytic activity;transferase activity, transferring phosphorus-containing groups;histidine phosphotransfer kinase activity;signal transducer activity;	3;1;5;2;4;3;2;	K11232	map02020;map04011;	Two-component system;MAPK signaling pathway - yeast;	IPR008207;	Signal transduction histidine kinase, phosphotransfer (Hpt) domain;	cytosol	SPBC725.02	110	T	[T] Signal transduction mechanisms;
T4ZZN0	Scavenger mRNA decapping enzyme OS=Ophiocordyceps sinensis (strain Co18 / CGMCC 3.14243) OX=911162 GN=OCS_05693 PE=4 SV=1	1.265	1.196	0.947	nan	nan	nan	1.365	1.142	0.986	nan	nan	nan	1.1249	0.12394	1.20952	0.0260004	1.36058	0.0229035	GO:0080090;GO:0019222;GO:1901360;GO:1901361;GO:0051716;GO:0010604;GO:0048869;GO:0044093;GO:0048518;GO:0060255;GO:0031668;GO:0060700;GO:0046483;GO:0031669;GO:0009605;GO:0031667;GO:0033554;GO:0019439;GO:0090342;GO:0009893;GO:0006807;GO:0050789;GO:1901575;GO:0044265;GO:0044260;GO:0065007;GO:0043085;GO:0065009;GO:0007584;GO:0050793;GO:0050790;GO:0046700;GO:0006950;GO:0008150;GO:0008152;GO:0009266;GO:…	regulation of primary metabolic process;regulation of metabolic process;organic cyclic compound metabolic process;organic cyclic compound catabolic process;cellular response to stimulus;positive regulation of macromolecule metabolic process;cellular developmental process;positive regulation of molecular function;positive regulation of biological process;regulation of macromolecule metabolic proce…	4;3;4;5;3;4;4;4;2;4;4;6;4;5;3;5;4;5;4;3;3;2;4;5;4;2;5;3;4;3;4;5;3;1;2;4;5;3;9;6;5;2;5;5;4;4;4;5;2;4;9;2;5;4;3;2;4;4;4;4;9;4;5;5;5;4;8;6;7;4;4;4;5;5;4;3;6;7;5;5;3;3;4;4;3;3;5;3;6;3;3;	GO:0035770;GO:0030529;GO:0048471;GO:0043232;GO:0044464;GO:0043229;GO:0005622;GO:0044444;GO:0005737;GO:1990904;GO:0005623;GO:0043228;GO:0036464;GO:0044424;GO:0043226;GO:0032991;GO:0000932;GO:0005575;	ribonucleoprotein granule;intracellular ribonucleoprotein complex;perinuclear region of cytoplasm;intracellular non-membrane-bounded organelle;cell part;intracellular organelle;intracellular;cytoplasmic part;cytoplasm;ribonucleoprotein complex;cell;non-membrane-bounded organelle;cytoplasmic ribonucleoprotein granule;intracellular part;organelle;macromolecular complex;cytoplasmic mRNA processing b…	5;4;5;4;2;3;3;4;4;3;2;3;5;3;2;2;6;1;	GO:1901363;GO:0050072;GO:0016818;GO:0016817;GO:0003674;GO:0005488;GO:0003676;GO:0016787;GO:0000339;GO:0003824;GO:0097159;GO:0098772;GO:0016462;GO:0046983;GO:0046982;GO:0044692;GO:0042802;GO:0042803;GO:0003723;GO:0005515;GO:0000340;GO:0008047;GO:0030234;	heterocyclic compound binding;m7G(5')pppN diphosphatase activity;hydrolase activity, acting on acid anhydrides, in phosphorus-containing anhydrides;hydrolase activity, acting on acid anhydrides;molecular_function;binding;nucleic acid binding;hydrolase activity;RNA cap binding;catalytic activity;organic cyclic compound binding;molecular function regulator;pyrophosphatase activity;protein dimerizat…	3;7;5;4;1;2;4;3;6;2;3;2;6;4;5;5;4;5;5;3;7;4;3;	K12584	map03018;	RNA degradation;	IPR011145;IPR008594;IPR011146;	Scavenger mRNA decapping enzyme, N-terminal;Scavenger mRNA decapping enzyme DcpS/DCS2;HIT-like domain;	cytosol	SPBP4H10.20	210	S	[S] Function unknown;
T5AE75	Pyridine nucleotide-disulfide oxidoreductase OS=Ophiocordyceps sinensis (strain Co18 / CGMCC 3.14243) OX=911162 GN=OCS_04170 PE=4 SV=1	1.045	0.962	1.35	0.68	1.057	1.611	0.379	1.166	1.697	0.633	0.97	1.922	0.658722	0.0504077	0.63146	0.00313029	0.41596	0.00182107				GO:0005575;GO:0005576;	cellular_component;extracellular region;	1;2;	GO:0016209;GO:0003824;GO:0003674;GO:0016651;GO:0016667;GO:0016668;GO:0004791;GO:0016491;	antioxidant activity;catalytic activity;molecular_function;oxidoreductase activity, acting on NAD(P)H;oxidoreductase activity, acting on a sulfur group of donors;oxidoreductase activity, acting on a sulfur group of donors, NAD(P) as acceptor;thioredoxin-disulfide reductase activity;oxidoreductase activity;	2;2;1;4;4;5;3;3;				IPR000103;IPR023753;	Pyridine nucleotide-disulphide oxidoreductase, class-II;FAD/NAD(P)-binding domain;	cytosol	436838080	111	O	[O] Posttranslational modification, protein turnover, chaperones;	COG0492	Thioredoxin reductase
T5AJH5	Superoxide dismutase OS=Ophiocordyceps sinensis (strain Co18 / CGMCC 3.14243) OX=911162 GN=OCS_01730 PE=3 SV=1	0.572	1.072	1.371	0.853	1.001	1.483	0.195	1.048	2.109	1.141	0.952	1.356	0.677879	0.158286	0.64456	0.0208914	0.43694	0.0164144	GO:0080090;GO:0019222;GO:2000112;GO:1901362;GO:1901360;GO:0051716;GO:0098869;GO:0060255;GO:1990748;GO:2001141;GO:0010035;GO:0046483;GO:0001306;GO:0019430;GO:0033554;GO:0019438;GO:0034645;GO:0000305;GO:0000303;GO:0000302;GO:0006807;GO:0098754;GO:0050789;GO:0097659;GO:0001315;GO:1901576;GO:0071451;GO:0071450;GO:0065007;GO:0006366;GO:0018130;GO:0009889;GO:0044710;GO:0006950;GO:0008150;GO:0008152;GO:…	regulation of primary metabolic process;regulation of metabolic process;regulation of cellular macromolecule biosynthetic process;organic cyclic compound biosynthetic process;organic cyclic compound metabolic process;cellular response to stimulus;cellular oxidant detoxification;regulation of macromolecule metabolic process;cellular detoxification;regulation of RNA biosynthetic process;response to…	4;3;6;5;4;3;4;4;3;6;4;4;5;4;4;5;5;5;6;5;3;2;2;7;6;4;7;6;2;7;5;4;3;3;1;2;5;3;5;5;2;6;5;6;6;4;4;4;2;4;2;5;2;4;4;7;4;4;5;4;5;5;4;5;4;4;3;5;7;5;5;6;3;3;5;3;4;3;5;4;3;4;3;	GO:0031974;GO:0043231;GO:0043233;GO:0044429;GO:0044424;GO:0044422;GO:0043229;GO:0005622;GO:0043227;GO:0044446;GO:0044444;GO:0005737;GO:0005739;GO:0044464;GO:0005623;GO:0043226;GO:0005759;GO:0005575;GO:0070013;	membrane-enclosed lumen;intracellular membrane-bounded organelle;organelle lumen;mitochondrial part;intracellular part;organelle part;intracellular organelle;intracellular;membrane-bounded organelle;intracellular organelle part;cytoplasmic part;cytoplasm;mitochondrion;cell part;cell;organelle;mitochondrial matrix;cellular_component;intracellular organelle lumen;	2;4;3;4;3;2;3;3;3;3;4;4;5;2;2;2;5;1;4;	GO:0046872;GO:0016209;GO:0004784;GO:0003674;GO:0005488;GO:0046914;GO:0043169;GO:0030145;GO:0003824;GO:0016491;GO:0043167;GO:0016721;	metal ion binding;antioxidant activity;superoxide dismutase activity;molecular_function;binding;transition metal ion binding;cation binding;manganese ion binding;catalytic activity;oxidoreductase activity;ion binding;oxidoreductase activity, acting on superoxide radicals as acceptor;	5;2;3;1;2;6;4;7;2;3;3;4;	K04564	map04068;map04146;map04211;map04212;map04213;map05016;	FoxO signaling pathway;Peroxisome;Longevity regulating pathway;Longevity regulating pathway - worm;Longevity regulating pathway - multiple species;Huntington's disease;	IPR001189;IPR019831;IPR019833;IPR019832;	Manganese/iron superoxide dismutase;Manganese/iron superoxide dismutase, N-terminal;Manganese/iron superoxide dismutase, binding site;Manganese/iron superoxide dismutase, C-terminal;	mitochondria	Hs10835187	243	P	[P] Inorganic ion transport and metabolism;
T5AIP9	Mannitol-1-phosphate 5-dehydrogenase OS=Ophiocordyceps sinensis (strain Co18 / CGMCC 3.14243) OX=911162 GN=OCS_01800 PE=3 SV=1	0.826	1.125	0.826	0.781	1.15	0.89	0.76	1.286	0.836	0.826	0.922	1.024	0.712246	0.00572911	1.25364	0.0416882	0.8929	0.095684	GO:0019594;GO:0019751;GO:0044699;GO:0044710;GO:0044262;GO:0006059;GO:0071704;GO:0019400;GO:0009987;GO:0008150;GO:0008152;GO:0044723;GO:0044238;GO:0005975;GO:0044237;GO:0006066;GO:0044763;GO:1901615;GO:0044281;	mannitol metabolic process;polyol metabolic process;single-organism process;single-organism metabolic process;cellular carbohydrate metabolic process;hexitol metabolic process;organic substance metabolic process;alditol metabolic process;cellular process;biological_process;metabolic process;single-organism carbohydrate metabolic process;primary metabolic process;carbohydrate metabolic process;cel…	6;6;2;3;4;5;3;4;2;1;2;4;3;4;3;5;3;4;4;	GO:0005575;GO:0005576;	cellular_component;extracellular region;	1;2;	GO:0008926;GO:0003674;GO:0005488;GO:0016491;GO:0050662;GO:0003824;GO:0016614;GO:0016616;GO:0048037;	mannitol-1-phosphate 5-dehydrogenase activity;molecular_function;binding;oxidoreductase activity;coenzyme binding;catalytic activity;oxidoreductase activity, acting on CH-OH group of donors;oxidoreductase activity, acting on the CH-OH group of donors, NAD or NADP as acceptor;cofactor binding;	6;1;2;3;4;2;4;5;3;	K00009	map00051;	Fructose and mannose metabolism;	IPR000669;IPR013118;IPR013131;IPR023028;IPR008927;IPR013328;IPR016040;	Mannitol dehydrogenase;Mannitol dehydrogenase, C-terminal;Mannitol dehydrogenase, N-terminal;Mannitol-1-phosphate 5-dehydrogenase;6-phosphogluconate dehydrogenase C-terminal domain-like;6-phosphogluconate dehydrogenase, domain 2;NAD(P)-binding domain;	cytosol	258650327	394	G	[G] Carbohydrate transport and metabolism;	COG0246	Mannitol-1-phosphate/altronate dehydrogenases
T5A735	Cytochrome P450 OS=Ophiocordyceps sinensis (strain Co18 / CGMCC 3.14243) OX=911162 GN=OCS_03002 PE=4 SV=1	1.167	1.761	0.84	0.746	1.723	0.861	0.825	1.724	0.842	0.804	1.396	1.094	0.536343	0.00098163	1.81578	0.000412281	0.97388	0.841275	GO:0044249;GO:0045461;GO:0045460;GO:1901362;GO:0044699;GO:0044710;GO:0044711;GO:0044550;GO:0071704;GO:1901360;GO:0018130;GO:0019748;GO:1901576;GO:0009987;GO:0006725;GO:0009403;GO:0008150;GO:0009404;GO:0008152;GO:0019438;GO:1901376;GO:0046483;GO:0009058;GO:0044237;GO:0044763;GO:1901378;	cellular biosynthetic process;sterigmatocystin biosynthetic process;sterigmatocystin metabolic process;organic cyclic compound biosynthetic process;single-organism process;single-organism metabolic process;single-organism biosynthetic process;secondary metabolite biosynthetic process;organic substance metabolic process;organic cyclic compound metabolic process;heterocycle biosynthetic process;sec…	4;6;5;5;2;3;4;5;3;4;5;4;4;2;4;5;1;4;2;5;5;4;3;3;3;6;				GO:0004497;GO:0003674;GO:0005488;GO:1901363;GO:0016491;GO:0043169;GO:0046914;GO:0016705;GO:0043167;GO:0005506;GO:0046872;GO:0020037;GO:0003824;GO:0046906;GO:0097159;	monooxygenase activity;molecular_function;binding;heterocyclic compound binding;oxidoreductase activity;cation binding;transition metal ion binding;oxidoreductase activity, acting on paired donors, with incorporation or reduction of molecular oxygen;ion binding;iron ion binding;metal ion binding;heme binding;catalytic activity;tetrapyrrole binding;organic cyclic compound binding;	4;1;2;3;3;4;6;4;3;7;5;5;2;4;3;				IPR001128;IPR002401;	Cytochrome P450;Cytochrome P450, E-class, group I;	extracellular	Hs13435386	112	Q	[Q] Secondary metabolites biosynthesis, transport and catabolism;
T4ZY06	Extradiol ring-cleavage dioxygenase, class III enzyme, subunit B OS=Ophiocordyceps sinensis (strain Co18 / CGMCC 3.14243) OX=911162 GN=OCS_06261 PE=4 SV=1	2.072	0.737	1.292	nan	nan	nan	nan	nan	nan	1.496	0.673	1.12	2.53049	0.0651531	0.58458	0.0319469	1.47927	0.194392	GO:0044237;GO:0044699;GO:0044710;GO:0009987;GO:0006725;GO:0008150;GO:0008152;GO:0055114;	cellular metabolic process;single-organism process;single-organism metabolic process;cellular process;cellular aromatic compound metabolic process;biological_process;metabolic process;oxidation-reduction process;	3;2;3;2;4;1;2;4;	GO:0005737;GO:0044464;GO:0005623;GO:0005622;GO:0005575;GO:0044424;	cytoplasm;cell part;cell;intracellular;cellular_component;intracellular part;	4;2;2;3;1;3;	GO:0008270;GO:0046566;GO:0003674;GO:0016701;GO:0016491;GO:0043169;GO:0046914;GO:0016702;GO:0043167;GO:0005506;GO:0046872;GO:0050297;GO:0008198;GO:0003824;GO:0051213;GO:0005488;	zinc ion binding;DOPA dioxygenase activity;molecular_function;oxidoreductase activity, acting on single donors with incorporation of molecular oxygen;oxidoreductase activity;cation binding;transition metal ion binding;oxidoreductase activity, acting on single donors with incorporation of molecular oxygen, incorporation of two atoms of oxygen;ion binding;iron ion binding;metal ion binding;stizolob…	7;5;1;4;3;4;6;5;3;7;5;6;8;2;4;2;				IPR014436;IPR004183;	Extradiol aromatic ring-opening dioxygenase, DODA-type;Extradiol ring-cleavage dioxygenase, class III enzyme, subunit B;	cytoskeleton	193214730	176	Q	[Q] Secondary metabolites biosynthesis, transport and catabolism;	COG3384	Aromatic ring-opening dioxygenase, catalytic subunit, LigB family
T5A5N4	Catalase OS=Ophiocordyceps sinensis (strain Co18 / CGMCC 3.14243) OX=911162 GN=OCS_06587 PE=4 SV=1	1.152	0.731	1.408	1.263	0.681	1.165	1.259	0.816	1.034	nan	nan	nan	1.64902	0.000847241	0.61769	0.0168494	1.01857	0.856022	GO:0044237;GO:0044248;GO:0042744;GO:0044699;GO:0044710;GO:0044712;GO:0009987;GO:0072593;GO:0042743;GO:0044763;GO:0008152;GO:0009056;GO:0006979;GO:0050896;GO:0006950;GO:0008150;	cellular metabolic process;cellular catabolic process;hydrogen peroxide catabolic process;single-organism process;single-organism metabolic process;single-organism catabolic process;cellular process;reactive oxygen species metabolic process;hydrogen peroxide metabolic process;single-organism cellular process;metabolic process;catabolic process;response to oxidative stress;response to stimulus;res…	3;4;4;2;3;4;2;4;5;3;2;3;4;2;3;1;	GO:0042579;GO:0043229;GO:0043227;GO:0043226;GO:0005737;GO:0005777;GO:0043231;GO:0044464;GO:0005623;GO:0005622;GO:0005575;GO:0044444;GO:0044424;	microbody;intracellular organelle;membrane-bounded organelle;organelle;cytoplasm;peroxisome;intracellular membrane-bounded organelle;cell part;cell;intracellular;cellular_component;cytoplasmic part;intracellular part;	5;3;3;2;4;6;4;2;2;3;1;4;3;	GO:0003674;GO:0005488;GO:0043167;GO:0016491;GO:0043169;GO:1901363;GO:0016684;GO:0020037;GO:0016209;GO:0003824;GO:0046872;GO:0046906;GO:0097159;GO:0004096;GO:0004601;	molecular_function;binding;ion binding;oxidoreductase activity;cation binding;heterocyclic compound binding;oxidoreductase activity, acting on peroxide as acceptor;heme binding;antioxidant activity;catalytic activity;metal ion binding;tetrapyrrole binding;organic cyclic compound binding;catalase activity;peroxidase activity;	1;2;3;3;4;3;4;5;2;2;5;4;3;4;3;	K03781	map00380;map00630;map01110;map01130;map01200;map04011;map04068;map04146;map04211;map04212;map04213;map05014;	Tryptophan metabolism;Glyoxylate and dicarboxylate metabolism;Biosynthesis of secondary metabolites;Biosynthesis of antibiotics;Carbon metabolism;MAPK signaling pathway - yeast;FoxO signaling pathway;Peroxisome;Longevity regulating pathway;Longevity regulating pathway - worm;Longevity regulating pathway - multiple species;Amyotrophic lateral sclerosis (ALS);	IPR024711;IPR024708;IPR018028;IPR010582;IPR020835;IPR011614;	Catalase, mono-functional, haem-containing, clades 1 and 3;Catalase active site;Catalase, mono-functional, haem-containing;Catalase immune-responsive domain;Catalase-like domain;Catalase core domain;	mitochondria	CE22476	382	P	[P] Inorganic ion transport and metabolism;
T5A918	Protein disulfide-isomerase tigA OS=Ophiocordyceps sinensis (strain Co18 / CGMCC 3.14243) OX=911162 GN=OCS_05373 PE=3 SV=1	0.969	1.207	0.992	1.136	1.128	0.9	1.064	1.112	0.951	0.638	1.435	0.987	0.779806	0.0895424	1.27467	0.0145502	0.99399	0.960743	GO:0006457;GO:0045454;GO:0042592;GO:0070887;GO:0044699;GO:0051716;GO:0034976;GO:0050789;GO:0065007;GO:0019725;GO:0009987;GO:0050794;GO:0006950;GO:0008150;GO:0042221;GO:0034599;GO:0006979;GO:0065008;GO:0050896;GO:0033554;GO:0044763;	protein folding;cell redox homeostasis;homeostatic process;cellular response to chemical stimulus;single-organism process;cellular response to stimulus;response to endoplasmic reticulum stress;regulation of biological process;biological regulation;cellular homeostasis;cellular process;regulation of cellular process;response to stress;biological_process;response to chemical;cellular response to ox…	3;4;4;4;2;3;5;2;2;4;2;3;3;1;3;5;4;3;2;4;3;	GO:0005783;GO:0031974;GO:0043229;GO:0043227;GO:0043226;GO:0005737;GO:0005575;GO:0044432;GO:0005788;GO:0043231;GO:0043233;GO:0044464;GO:0005623;GO:0005622;GO:0044446;GO:0070013;GO:0044444;GO:0044424;GO:0044422;GO:0012505;	endoplasmic reticulum;membrane-enclosed lumen;intracellular organelle;membrane-bounded organelle;organelle;cytoplasm;cellular_component;endoplasmic reticulum part;endoplasmic reticulum lumen;intracellular membrane-bounded organelle;organelle lumen;cell part;cell;intracellular;intracellular organelle part;intracellular organelle lumen;cytoplasmic part;intracellular part;organelle part;endomembrane…	4;2;3;3;2;4;1;4;5;4;3;2;2;3;3;4;4;3;2;3;	GO:0003674;GO:0016864;GO:0016860;GO:0003756;GO:0016667;GO:0016491;GO:0003824;GO:0016853;GO:0015036;GO:0015035;	molecular_function;intramolecular oxidoreductase activity, transposing S-S bonds;intramolecular oxidoreductase activity;protein disulfide isomerase activity;oxidoreductase activity, acting on a sulfur group of donors;oxidoreductase activity;catalytic activity;isomerase activity;disulfide oxidoreductase activity;protein disulfide oxidoreductase activity;	1;5;4;6;4;3;2;3;5;6;	K09584	map04141;	Protein processing in endoplasmic reticulum;	IPR011679;IPR017937;IPR005788;IPR013766;IPR012336;	Endoplasmic reticulum resident protein 29, C-terminal;Thioredoxin, conserved site;Disulphide isomerase;Thioredoxin domain;Thioredoxin-like fold;	extracellular	At2g47470	242	O	[O] Posttranslational modification, protein turnover, chaperones;
T5A8U4	Bli-3 OS=Ophiocordyceps sinensis (strain Co18 / CGMCC 3.14243) OX=911162 GN=OCS_05450 PE=4 SV=1	0.966	1.053	1.542	0.704	1.15	1.621	1.027	1.12	1.396	1.131	0.929	1.257	0.900284	0.34456	0.73109	0.00603178	0.65818	0.00641914							GO:0097367;GO:0097159;GO:1901265;GO:0000166;GO:0036094;GO:0003824;GO:0003674;GO:0005488;GO:0010181;GO:0048037;GO:1901363;GO:0032553;GO:0016491;	carbohydrate derivative binding;organic cyclic compound binding;nucleoside phosphate binding;nucleotide binding;small molecule binding;catalytic activity;molecular_function;binding;FMN binding;cofactor binding;heterocyclic compound binding;ribonucleotide binding;oxidoreductase activity;	3;3;4;4;3;2;1;2;4;3;3;4;3;				IPR012349;	FMN-binding split barrel;	cytosol	159898212	73.9	S	[S] Function unknown;	COG3871	General stress protein 26 (function unknown)
T5AJB7	Isoflavone reductase family protein OS=Ophiocordyceps sinensis (strain Co18 / CGMCC 3.14243) OX=911162 GN=OCS_02428 PE=4 SV=1	0.994	1.228	1.11	1.125	1.447	0.782	1.086	1.306	1.118	0.878	1.342	1.014	0.767048	0.00483871	1.32281	0.0115584	1.01466	0.882519							GO:0016628;GO:0016627;GO:0010283;GO:0003824;GO:0003674;GO:0016491;	oxidoreductase activity, acting on the CH-CH group of donors, NAD or NADP as acceptor;oxidoreductase activity, acting on the CH-CH group of donors;pinoresinol reductase activity;catalytic activity;molecular_function;oxidoreductase activity;	5;4;6;2;1;3;				IPR016040;IPR008030;	NAD(P)-binding domain;NmrA-like domain;	mitochondria	116620580	66.6	R	[R] General function prediction only;	COG0702	Uncharacterized conserved protein YbjT, contains NAD(P)-binding and DUF2867 domains
T5A9Z5	Acetohydroxy acid isomeroreductase OS=Ophiocordyceps sinensis (strain Co18 / CGMCC 3.14243) OX=911162 GN=OCS_05057 PE=3 SV=1	1.061	1.112	0.957	0.986	1.279	0.9	1.287	1.041	0.824	0.89	1.288	0.815	0.894919	0.28058	1.35011	0.00474138	1.20824	0.0924469	GO:0019752;GO:0044249;GO:0006807;GO:0044281;GO:0044283;GO:0044699;GO:1901576;GO:0044710;GO:0044711;GO:0006549;GO:0006520;GO:0071704;GO:0009099;GO:0009097;GO:1901605;GO:1901607;GO:0008652;GO:0009987;GO:0009058;GO:0008150;GO:0008152;GO:0043436;GO:0044238;GO:0006573;GO:1901564;GO:0006082;GO:1901566;GO:0046394;GO:0016053;GO:0044237;GO:0044763;GO:0009081;GO:0009082;	carboxylic acid metabolic process;cellular biosynthetic process;nitrogen compound metabolic process;small molecule metabolic process;small molecule biosynthetic process;single-organism process;organic substance biosynthetic process;single-organism metabolic process;single-organism biosynthetic process;isoleucine metabolic process;cellular amino acid metabolic process;organic substance metabolic p…	6;4;3;4;5;2;4;3;4;6;4;3;7;7;5;6;5;2;3;1;2;5;3;6;4;4;5;6;5;3;3;5;6;	GO:0043229;GO:0043227;GO:0043226;GO:0005737;GO:0005623;GO:0005739;GO:0043231;GO:0044464;GO:0005622;GO:0005575;GO:0044444;GO:0044424;	intracellular organelle;membrane-bounded organelle;organelle;cytoplasm;cell;mitochondrion;intracellular membrane-bounded organelle;cell part;intracellular;cellular_component;cytoplasmic part;intracellular part;	3;3;2;4;2;5;4;2;3;1;4;3;	GO:0005488;GO:0043169;GO:0003674;GO:0016491;GO:0016616;GO:0043167;GO:0046872;GO:0003824;GO:0016614;GO:0004455;	binding;cation binding;molecular_function;oxidoreductase activity;oxidoreductase activity, acting on the CH-OH group of donors, NAD or NADP as acceptor;ion binding;metal ion binding;catalytic activity;oxidoreductase activity, acting on CH-OH group of donors;ketol-acid reductoisomerase activity;	2;4;1;3;5;3;5;2;4;6;	K00053	map00290;map00770;map01100;map01110;map01130;map01210;map01230;	Valine, leucine and isoleucine biosynthesis;Pantothenate and CoA biosynthesis;Metabolic pathways;Biosynthesis of secondary metabolites;Biosynthesis of antibiotics;2-Oxocarboxylic acid metabolism;Biosynthesis of amino acids;	IPR013116;IPR008927;IPR016207;IPR000506;IPR013328;IPR016040;IPR013023;	Acetohydroxy acid isomeroreductase, NADPH-binding domain;6-phosphogluconate dehydrogenase C-terminal domain-like;Ketol-acid reductoisomerase, fungi;Acetohydroxy acid isomeroreductase C-terminal;6-phosphogluconate dehydrogenase, domain 2;NAD(P)-binding domain;Ketol-acid reductoisomerase;	mitochondria	375143470	425	EH	[E] Amino acid transport and metabolism; [H] Coenzyme transport and metabolism;	COG0059	Ketol-acid reductoisomerase
T5A6F1	Superoxide dismutase OS=Ophiocordyceps sinensis (strain Co18 / CGMCC 3.14243) OX=911162 GN=OCS_06956 PE=4 SV=1	0.983	0.79	1.45	1.182	0.802	1.191	1.051	0.904	0.989	1.055	0.861	1.342	1.27226	0.00355697	0.67518	0.0079474	0.85901	0.156504				GO:0005737;GO:0044464;GO:0005623;GO:0005622;GO:0005575;GO:0044424;	cytoplasm;cell part;cell;intracellular;cellular_component;intracellular part;	4;2;2;3;1;3;	GO:0016721;GO:0043169;GO:0016209;GO:0043167;GO:0003824;GO:0003674;GO:0005488;GO:0004784;GO:0046872;GO:0016491;	oxidoreductase activity, acting on superoxide radicals as acceptor;cation binding;antioxidant activity;ion binding;catalytic activity;molecular_function;binding;superoxide dismutase activity;metal ion binding;oxidoreductase activity;	4;4;2;3;2;1;2;3;5;3;	K04565	map04146;map04213;map05014;map05016;map05020;	Peroxisome;Longevity regulating pathway - multiple species;Amyotrophic lateral sclerosis (ALS);Huntington's disease;Prion diseases;	IPR001424;	Superoxide dismutase, copper/zinc binding domain;	nucleus	YJR104c	102	P	[P] Inorganic ion transport and metabolism;
T5AJL9	2-nitropropane dioxygenase OS=Ophiocordyceps sinensis (strain Co18 / CGMCC 3.14243) OX=911162 GN=OCS_01685 PE=4 SV=1	1.167	1.07	0.692	1.014	1.007	0.75	1.181	0.933	0.745	0.94	0.981	0.793	1.07792	0.27983	1.33926	0.000372027	1.44362	0.00184178							GO:0004497;GO:0016703;GO:0016701;GO:0003824;GO:0003674;GO:0018580;GO:0016491;	monooxygenase activity;oxidoreductase activity, acting on single donors with incorporation of molecular oxygen, incorporation of one atom of oxygen (internal monooxygenases or internal mixed function oxidases);oxidoreductase activity, acting on single donors with incorporation of molecular oxygen;catalytic activity;molecular_function;nitronate monooxygenase activity;oxidoreductase activity;	4;5;4;2;1;6;3;				IPR004136;IPR013785;	Nitronate monooxygenase;Aldolase-type TIM barrel;	cytosol	154251214	190	R	[R] General function prediction only;	COG2070	NAD(P)H-dependent flavin oxidoreductase YrpB, nitropropane dioxygenase family
T5AA56	Aldehyde dehydrogenase domain protein OS=Ophiocordyceps sinensis (strain Co18 / CGMCC 3.14243) OX=911162 GN=OCS_04811 PE=4 SV=1	0.858	1.214	1.476	0.968	0.962	1.348	1.448	0.799	1.137	1.146	0.922	1.258	1.13421	0.432678	0.74669	0.0262586	0.84691	0.224091	GO:0009065;GO:0044237;GO:0019752;GO:0006540;GO:0044248;GO:0006807;GO:0044281;GO:0044282;GO:0009064;GO:0006536;GO:0044699;GO:0006105;GO:0044710;GO:0006520;GO:0071704;GO:1901605;GO:1901606;GO:0044712;GO:0009448;GO:0044238;GO:0009987;GO:1901575;GO:0032787;GO:0008150;GO:0008152;GO:0072329;GO:0043436;GO:0009056;GO:0043649;GO:0009063;GO:0043648;GO:1901564;GO:1901565;GO:0006082;GO:0046395;GO:0044763;GO:…	glutamine family amino acid catabolic process;cellular metabolic process;carboxylic acid metabolic process;glutamate decarboxylation to succinate;cellular catabolic process;nitrogen compound metabolic process;small molecule metabolic process;small molecule catabolic process;glutamine family amino acid metabolic process;glutamate metabolic process;single-organism process;succinate metabolic proces…	7;3;6;9;4;3;4;5;6;7;2;8;3;4;3;5;6;4;5;3;2;4;7;1;2;7;5;3;7;5;7;4;5;4;6;3;6;8;5;	GO:0005737;GO:0005829;GO:0044464;GO:0005623;GO:0005622;GO:0005575;GO:0044444;GO:0044424;	cytoplasm;cytosol;cell part;cell;intracellular;cellular_component;cytoplasmic part;intracellular part;	4;5;2;2;3;1;4;3;	GO:0003674;GO:0016491;GO:0016620;GO:0003824;GO:0016903;GO:0009013;	molecular_function;oxidoreductase activity;oxidoreductase activity, acting on the aldehyde or oxo group of donors, NAD or NADP as acceptor;catalytic activity;oxidoreductase activity, acting on the aldehyde or oxo group of donors;succinate-semialdehyde dehydrogenase [NAD(P)+] activity;	1;3;5;2;4;6;	K00135	map00250;map00310;map00350;map00650;map00760;map01100;map01120;	Alanine, aspartate and glutamate metabolism;Lysine degradation;Tyrosine metabolism;Butanoate metabolism;Nicotinate and nicotinamide metabolism;Metabolic pathways;Microbial metabolism in diverse environments;	IPR016162;IPR015590;IPR016161;	Aldehyde dehydrogenase N-terminal domain;Aldehyde dehydrogenase domain;Aldehyde/histidinol dehydrogenase;	cytosol	SPAC1002.12c	283	C	[C] Energy production and conversion;
T5AF35	Transaldolase OS=Ophiocordyceps sinensis (strain Co18 / CGMCC 3.14243) OX=911162 GN=OCS_03843 PE=4 SV=1	2.069	0.566	1.28	0.968	0.68	1.19	0.702	0.411	1.354	0.729	0.727	1.336	1.87417	0.165986	0.46202	0.000124115	0.86589	0.61365	GO:0042221;GO:0006739;GO:0006732;GO:0006733;GO:0009117;GO:1901564;GO:0034641;GO:0006098;GO:0046496;GO:0070887;GO:0006081;GO:0072524;GO:0044699;GO:0006139;GO:0044710;GO:0051186;GO:0048869;GO:0019682;GO:0071704;GO:1901360;GO:0019637;GO:0044281;GO:0032502;GO:0019693;GO:0009987;GO:0006725;GO:0051716;GO:0044767;GO:0006950;GO:0008150;GO:0008152;GO:0007568;GO:0034599;GO:0006979;GO:0055086;GO:0046483;GO:…	response to chemical;NADP metabolic process;coenzyme metabolic process;oxidoreduction coenzyme metabolic process;nucleotide metabolic process;organonitrogen compound metabolic process;cellular nitrogen compound metabolic process;pentose-phosphate shunt;nicotinamide nucleotide metabolic process;cellular response to chemical stimulus;cellular aldehyde metabolic process;pyridine-containing compound …	3;8;5;6;6;4;4;6;7;4;4;5;2;4;3;4;4;5;3;4;4;4;2;5;2;4;3;3;3;1;2;4;5;4;4;4;3;4;5;6;5;4;5;3;4;4;3;3;5;2;6;	GO:0005737;GO:0044464;GO:0005623;GO:0005622;GO:0005575;GO:0044424;	cytoplasm;cell part;cell;intracellular;cellular_component;intracellular part;	4;2;2;3;1;3;	GO:0003674;GO:0016740;GO:0016744;GO:0003824;GO:0004801;	molecular_function;transferase activity;transferase activity, transferring aldehyde or ketonic groups;catalytic activity;sedoheptulose-7-phosphate:D-glyceraldehyde-3-phosphate glyceronetransferase activity;	1;3;4;2;5;				IPR001585;IPR013785;	Transaldolase/Fructose-6-phosphate aldolase;Aldolase-type TIM barrel;	mitochondria	YGR043c	89.7	G	[G] Carbohydrate transport and metabolism;
T5AA62	Alcohol dehydrogenase superfamily, zinc-type OS=Ophiocordyceps sinensis (strain Co18 / CGMCC 3.14243) OX=911162 GN=OCS_04977 PE=4 SV=1	1.071	0.77	1.166	0.803	0.875	1.244	1.553	0.691	0.858	1.145	0.708	1.124	1.50198	0.054922	0.69308	0.0113304	1.04098	0.807088	GO:0070887;GO:0051716;GO:0009987;GO:0006950;GO:0008150;GO:0042221;GO:0034599;GO:0006979;GO:0050896;GO:0033554;	cellular response to chemical stimulus;cellular response to stimulus;cellular process;response to stress;biological_process;response to chemical;cellular response to oxidative stress;response to oxidative stress;response to stimulus;cellular response to stress;	4;3;2;3;1;3;5;4;2;4;				GO:0003676;GO:0003674;GO:0005488;GO:1901363;GO:0016491;GO:0043169;GO:0016628;GO:0046914;GO:0016627;GO:0043167;GO:0017091;GO:0032440;GO:0046872;GO:0003723;GO:0003824;GO:0003960;GO:0097159;GO:0016655;GO:0016651;GO:0008270;	nucleic acid binding;molecular_function;binding;heterocyclic compound binding;oxidoreductase activity;cation binding;oxidoreductase activity, acting on the CH-CH group of donors, NAD or NADP as acceptor;transition metal ion binding;oxidoreductase activity, acting on the CH-CH group of donors;ion binding;AU-rich element binding;2-alkenal reductase [NAD(P)] activity;metal ion binding;RNA binding;ca…	4;1;2;3;3;4;5;6;4;3;6;6;5;5;2;6;3;5;4;7;	K00344			IPR013149;IPR011032;IPR016040;IPR002364;IPR020843;	Alcohol dehydrogenase, C-terminal;GroES-like;NAD(P)-binding domain;Quinone oxidoreductase/zeta-crystallin, conserved site;Polyketide synthase, enoylreductase domain;	cytosol	YBR046c	238	CR	[C] Energy production and conversion;[R] General function prediction only;
T5AKS6	Formate dehydrogenase OS=Ophiocordyceps sinensis (strain Co18 / CGMCC 3.14243) OX=911162 GN=OCS_01102 PE=3 SV=1	1.15	1.695	0.602	1.164	1.356	0.818	1.219	1.207	0.825	1.064	1.318	1.003	0.824429	0.067688	1.71675	0.00475747	1.41533	0.00867846	GO:0019752;GO:0044248;GO:0044282;GO:0044710;GO:0071704;GO:0044699;GO:0044712;GO:0009987;GO:1901575;GO:0032787;GO:0015942;GO:0008152;GO:0072329;GO:0043436;GO:0009056;GO:0042183;GO:0006082;GO:0044763;GO:0046395;GO:0008150;GO:0044237;GO:0016054;GO:0044281;	carboxylic acid metabolic process;cellular catabolic process;small molecule catabolic process;single-organism metabolic process;organic substance metabolic process;single-organism process;single-organism catabolic process;cellular process;organic substance catabolic process;monocarboxylic acid metabolic process;formate metabolic process;metabolic process;monocarboxylic acid catabolic process;oxoa…	6;4;5;3;3;2;4;2;4;7;8;2;7;5;3;8;4;3;6;1;3;5;4;	GO:0005737;GO:0005829;GO:0044464;GO:0005623;GO:0005622;GO:0005575;GO:0044444;GO:0044424;	cytoplasm;cytosol;cell part;cell;intracellular;cellular_component;cytoplasmic part;intracellular part;	4;5;2;2;3;1;4;3;	GO:0051287;GO:0016620;GO:0003674;GO:0005488;GO:1901363;GO:1901265;GO:0016491;GO:0050662;GO:0016616;GO:0000166;GO:0036094;GO:0003824;GO:0048037;GO:0008863;GO:0016614;GO:0097159;GO:0016903;	NAD binding;oxidoreductase activity, acting on the aldehyde or oxo group of donors, NAD or NADP as acceptor;molecular_function;binding;heterocyclic compound binding;nucleoside phosphate binding;oxidoreductase activity;coenzyme binding;oxidoreductase activity, acting on the CH-OH group of donors, NAD or NADP as acceptor;nucleotide binding;small molecule binding;catalytic activity;cofactor binding;…	5;5;1;2;3;4;3;4;5;4;3;2;3;6;4;3;4;	K00122	map00630;map00680;map01100;map01120;map01200;	Glyoxylate and dicarboxylate metabolism;Methane metabolism;Metabolic pathways;Microbial metabolism in diverse environments;Carbon metabolism;	IPR006140;IPR033689;IPR029753;IPR029752;IPR006139;IPR016040;	D-isomer specific 2-hydroxyacid dehydrogenase, NAD-binding domain;NAD-dependent formate dehydrogenase;D-isomer specific 2-hydroxyacid dehydrogenase, NAD-binding domain conserved site;D-isomer specific 2-hydroxyacid dehydrogenase, NAD-binding domain conserved site 1;D-isomer specific 2-hydroxyacid dehydrogenase, catalytic domain;NAD(P)-binding domain;	mitochondria	YOR388c	427	C	[C] Energy production and conversion;
T5A9V1	Glutathione peroxidase OS=Ophiocordyceps sinensis (strain Co18 / CGMCC 3.14243) OX=911162 GN=OCS_02048 PE=3 SV=1	1.345	1.071	0.995	1.013	1.189	0.875	1.295	1.015	0.726	1.024	1.217	0.766	1.04119	0.659723	1.33611	0.0105115	1.39114	0.0214201	GO:0006950;GO:0070887;GO:0098754;GO:0051716;GO:0009636;GO:0098869;GO:0009987;GO:1990748;GO:0008150;GO:0042221;GO:0034599;GO:0006979;GO:0050896;GO:0033554;	response to stress;cellular response to chemical stimulus;detoxification;cellular response to stimulus;response to toxic substance;cellular oxidant detoxification;cellular process;cellular detoxification;biological_process;response to chemical;cellular response to oxidative stress;response to oxidative stress;response to stimulus;cellular response to stress;	3;4;2;3;4;4;2;3;1;3;5;4;2;4;	GO:0044464;GO:0031975;GO:0043229;GO:0043227;GO:0043226;GO:0005737;GO:0044446;GO:0031090;GO:0098805;GO:0016020;GO:0005740;GO:0005739;GO:0019867;GO:0031968;GO:0098588;GO:0031967;GO:0031966;GO:0031315;GO:0044425;GO:0019898;GO:0044455;GO:0043231;GO:0019866;GO:0031314;GO:0005623;GO:0005622;GO:0005575;GO:0005743;GO:0044444;GO:0005741;GO:0044429;GO:0044424;GO:0031312;GO:0044422;	cell part;envelope;intracellular organelle;membrane-bounded organelle;organelle;cytoplasm;intracellular organelle part;organelle membrane;whole membrane;membrane;mitochondrial envelope;mitochondrion;outer membrane;organelle outer membrane;bounding membrane of organelle;organelle envelope;mitochondrial membrane;extrinsic component of mitochondrial outer membrane;membrane part;extrinsic component o…	2;3;3;3;2;4;3;3;3;2;5;5;3;4;4;4;4;4;2;3;3;4;4;4;2;3;1;5;4;5;4;3;4;2;	GO:0047066;GO:0003674;GO:0016491;GO:0004602;GO:0016684;GO:0016209;GO:0003824;GO:0004601;	phospholipid-hydroperoxide glutathione peroxidase activity;molecular_function;oxidoreductase activity;glutathione peroxidase activity;oxidoreductase activity, acting on peroxide as acceptor;antioxidant activity;catalytic activity;peroxidase activity;	5;1;3;4;4;2;2;3;	K23856			IPR029759;IPR000889;IPR012336;IPR029760;	Glutathione peroxidase active site;Glutathione peroxidase;Thioredoxin-like fold;Glutathione peroxidase conserved site;	cytosol	SPBC32F12.03c	201	O	[O] Posttranslational modification, protein turnover, chaperones;
T5AHU7	NADPH--cytochrome P450 reductase OS=Ophiocordyceps sinensis (strain Co18 / CGMCC 3.14243) OX=911162 GN=cprA PE=3 SV=1	0.964	1.168	0.8	1.376	1.029	0.881	1.503	0.88	0.873	0.902	1.001	0.696	1.16356	0.338407	1.25477	0.0298051	1.46	0.0525742	GO:0044281;GO:0044283;GO:1901362;GO:1901360;GO:0044710;GO:0044711;GO:1902653;GO:1902652;GO:1901576;GO:0044699;GO:0006629;GO:0008150;GO:0008152;GO:0097384;GO:0006694;GO:0006696;GO:1901617;GO:1901615;GO:0016126;GO:0016125;GO:0046165;GO:0009987;GO:0016128;GO:0016129;GO:0044107;GO:0008204;GO:0044255;GO:0008202;GO:0044108;GO:0006066;GO:0071704;GO:0009058;GO:0044763;GO:0008610;GO:0044238;GO:0044237;GO:…	small molecule metabolic process;small molecule biosynthetic process;organic cyclic compound biosynthetic process;organic cyclic compound metabolic process;single-organism metabolic process;single-organism biosynthetic process;secondary alcohol biosynthetic process;secondary alcohol metabolic process;organic substance biosynthetic process;single-organism process;lipid metabolic process;biological…	4;5;5;4;3;4;7;6;4;2;4;1;2;5;6;6;5;4;7;6;6;2;6;7;4;5;4;5;5;5;3;3;3;5;3;3;4;	GO:0005783;GO:0005789;GO:0016021;GO:0016020;GO:0031968;GO:0098588;GO:0031967;GO:0031966;GO:0031975;GO:0043231;GO:0044429;GO:0044424;GO:0044425;GO:0044422;GO:0043229;GO:0043227;GO:0043226;GO:0044432;GO:0012505;GO:0044446;GO:0044444;GO:0042175;GO:0031224;GO:0005737;GO:0031090;GO:0005739;GO:0044464;GO:0019867;GO:0005623;GO:0005622;GO:0005740;GO:0005741;GO:0071944;GO:0098805;GO:0005886;GO:0005575;	endoplasmic reticulum;endoplasmic reticulum membrane;integral component of membrane;membrane;organelle outer membrane;bounding membrane of organelle;organelle envelope;mitochondrial membrane;envelope;intracellular membrane-bounded organelle;mitochondrial part;intracellular part;membrane part;organelle part;intracellular organelle;membrane-bounded organelle;organelle;endoplasmic reticulum part;end…	4;3;4;2;4;4;4;4;3;4;4;3;2;2;3;3;2;4;3;3;4;3;3;4;3;5;2;3;2;3;5;5;3;3;3;1;	GO:1901363;GO:0000166;GO:0046872;GO:0003958;GO:0097367;GO:0003674;GO:0005488;GO:1901265;GO:0046914;GO:0003824;GO:0097159;GO:0032553;GO:0016491;GO:0043169;GO:0043167;GO:0005506;GO:0009055;GO:0048037;GO:0016651;GO:0016653;GO:0010181;GO:0036094;	heterocyclic compound binding;nucleotide binding;metal ion binding;NADPH-hemoprotein reductase activity;carbohydrate derivative binding;molecular_function;binding;nucleoside phosphate binding;transition metal ion binding;catalytic activity;organic cyclic compound binding;ribonucleotide binding;oxidoreductase activity;cation binding;ion binding;iron ion binding;electron carrier activity;cofactor b…	3;4;5;6;3;1;2;4;6;2;3;4;3;4;3;7;2;3;4;5;4;3;	K00327			IPR017927;IPR029039;IPR008254;IPR001433;IPR017938;IPR001709;IPR001094;IPR023208;IPR003097;	Ferredoxin reductase-type FAD-binding domain;Flavoprotein-like domain;Flavodoxin/nitric oxide synthase;Oxidoreductase FAD/NAD(P)-binding;Riboflavin synthase-like beta-barrel;Flavoprotein pyridine nucleotide cytochrome reductase;Flavodoxin-like;NADPH-cytochrome P450 reductase;FAD-binding, type 1;	cytosol	SPBC365.17	560	C	[C] Energy production and conversion;
T5AP38	Glucose-methanol-choline oxidoreductase OS=Ophiocordyceps sinensis (strain Co18 / CGMCC 3.14243) OX=911162 GN=OCS_00778 PE=4 SV=1	1.314	0.869	1.025	1.022	0.802	1.07	1.311	0.746	1.088	1.129	0.733	1.088	1.51619	0.00202251	0.73753	0.000183819	1.11824	0.135969							GO:0043168;GO:0050662;GO:0050660;GO:0016614;GO:0097159;GO:0000166;GO:0036094;GO:0003824;GO:0003674;GO:0005488;GO:0048037;GO:0043167;GO:1901363;GO:1901265;GO:0016491;	anion binding;coenzyme binding;flavin adenine dinucleotide binding;oxidoreductase activity, acting on CH-OH group of donors;organic cyclic compound binding;nucleotide binding;small molecule binding;catalytic activity;molecular_function;binding;cofactor binding;ion binding;heterocyclic compound binding;nucleoside phosphate binding;oxidoreductase activity;	4;4;5;4;3;4;3;2;1;2;3;3;3;4;3;				IPR000172;IPR013083;IPR023753;IPR007867;IPR007527;IPR001841;	Glucose-methanol-choline oxidoreductase, N-terminal;Zinc finger, RING/FYVE/PHD-type;FAD/NAD(P)-binding domain;Glucose-methanol-choline oxidoreductase, C-terminal;Zinc finger, SWIM-type;Zinc finger, RING-type;	mitochondria	7293011	229	R	[R] General function prediction only;
T4ZWU2	Mitochondrial peroxiredoxin PRX1 OS=Ophiocordyceps sinensis (strain Co18 / CGMCC 3.14243) OX=911162 GN=OCS_06712 PE=4 SV=1	1.112	0.98	1.157	1.261	0.844	0.968	1.342	0.761	0.678	1.212	0.777	1.081	1.4655	0.00132031	0.8656	0.304804	1.26854	0.0648963	GO:0034599;GO:0042592;GO:0070887;GO:0098754;GO:0044699;GO:0051716;GO:0009636;GO:0050789;GO:0098869;GO:0065007;GO:0046686;GO:0019725;GO:0009987;GO:0050794;GO:1990748;GO:0008150;GO:0010038;GO:0042221;GO:0045454;GO:0010035;GO:0006979;GO:0065008;GO:0050896;GO:0006950;GO:0033554;GO:0044763;	cellular response to oxidative stress;homeostatic process;cellular response to chemical stimulus;detoxification;single-organism process;cellular response to stimulus;response to toxic substance;regulation of biological process;cellular oxidant detoxification;biological regulation;response to cadmium ion;cellular homeostasis;cellular process;regulation of cellular process;cellular detoxification;b…	5;4;4;2;2;3;4;2;4;2;6;4;2;3;3;1;5;3;4;4;4;3;2;3;4;3;	GO:0043229;GO:0043227;GO:0043226;GO:0005737;GO:0005739;GO:0043231;GO:0044464;GO:0005623;GO:0005622;GO:0005575;GO:0044444;GO:0044424;	intracellular organelle;membrane-bounded organelle;organelle;cytoplasm;mitochondrion;intracellular membrane-bounded organelle;cell part;cell;intracellular;cellular_component;cytoplasmic part;intracellular part;	3;3;2;4;5;4;2;2;3;1;4;3;	GO:0003674;GO:0008379;GO:0051920;GO:0016491;GO:0016684;GO:0016209;GO:0003824;GO:0004601;	molecular_function;thioredoxin peroxidase activity;peroxiredoxin activity;oxidoreductase activity;oxidoreductase activity, acting on peroxide as acceptor;antioxidant activity;catalytic activity;peroxidase activity;	1;4;3;3;4;2;2;3;	K24137			IPR012336;IPR000866;IPR019479;IPR013766;IPR024706;	Thioredoxin-like fold;Alkyl hydroperoxide reductase subunit C/ Thiol specific antioxidant;Peroxiredoxin, C-terminal;Thioredoxin domain;Peroxiredoxin, AhpC-type;	cytosol	YBL064c	250	O	[O] Posttranslational modification, protein turnover, chaperones;
T5A977	2-nitropropane dioxygenase OS=Ophiocordyceps sinensis (strain Co18 / CGMCC 3.14243) OX=911162 GN=OCS_02247 PE=4 SV=1	1.649	0.747	1.302	1.106	0.839	1.115	1.038	0.903	1.122	1.14	0.926	1.152	1.4445	0.0405126	0.72799	0.00170762	1.05159	0.694734							GO:0004497;GO:0016703;GO:0016701;GO:0003824;GO:0003674;GO:0018580;GO:0016491;	monooxygenase activity;oxidoreductase activity, acting on single donors with incorporation of molecular oxygen, incorporation of one atom of oxygen (internal monooxygenases or internal mixed function oxidases);oxidoreductase activity, acting on single donors with incorporation of molecular oxygen;catalytic activity;molecular_function;nitronate monooxygenase activity;oxidoreductase activity;	4;5;4;2;1;6;3;	K00459	map00910;	Nitrogen metabolism;	IPR004136;IPR013785;	Nitronate monooxygenase;Aldolase-type TIM barrel;	mitochondria	At5g64250	85.5	C	[C] Energy production and conversion;
T5AAS5	Peroxiredoxin OS=Ophiocordyceps sinensis (strain Co18 / CGMCC 3.14243) OX=911162 GN=OCS_01708 PE=3 SV=1	1.478	0.864	0.711	1.374	0.596	0.943	1.06	0.721	0.616	1.214	0.587	0.647	1.85189	0.0019248	0.94892	0.718151	1.75728	0.0033617				GO:0042579;GO:0043229;GO:0043227;GO:0043226;GO:0005737;GO:0005777;GO:0005622;GO:0043231;GO:0044464;GO:0005623;GO:0005575;GO:0044444;GO:0044424;	microbody;intracellular organelle;membrane-bounded organelle;organelle;cytoplasm;peroxisome;intracellular;intracellular membrane-bounded organelle;cell part;cell;cellular_component;cytoplasmic part;intracellular part;	5;3;3;2;4;6;3;4;2;2;1;4;3;	GO:0003674;GO:0005488;GO:0051920;GO:0016491;GO:0032403;GO:0016684;GO:0016209;GO:0003824;GO:0019863;GO:0019865;GO:0005515;GO:0044877;GO:0004601;	molecular_function;binding;peroxiredoxin activity;oxidoreductase activity;protein complex binding;oxidoreductase activity, acting on peroxide as acceptor;antioxidant activity;catalytic activity;IgE binding;immunoglobulin binding;protein binding;macromolecular complex binding;peroxidase activity;	1;2;3;3;4;4;2;2;6;5;3;3;3;	K14171	map04122;	Sulfur relay system;	IPR013766;IPR013740;IPR012336;	Thioredoxin domain;Redoxin;Thioredoxin-like fold;	cytosol	YLR109w	101	O	[O] Posttranslational modification, protein turnover, chaperones;
T5AL96	Catalase OS=Ophiocordyceps sinensis (strain Co18 / CGMCC 3.14243) OX=911162 GN=OCS_00915 PE=3 SV=1	1.554	0.669	1.512	1.089	0.728	1.175	1.311	0.637	1.014	1.29	0.763	0.902	1.87487	0.000841725	0.60765	0.0159174	1.13926	0.364636	GO:0044237;GO:0000302;GO:0044248;GO:0042744;GO:0098754;GO:0044699;GO:0044710;GO:0009636;GO:0098869;GO:0044712;GO:0009987;GO:0072593;GO:0006950;GO:0008150;GO:0008152;GO:0042221;GO:0010035;GO:0009056;GO:0006979;GO:1901700;GO:0042743;GO:0042542;GO:1990748;GO:0044763;GO:0050896;	cellular metabolic process;response to reactive oxygen species;cellular catabolic process;hydrogen peroxide catabolic process;detoxification;single-organism process;single-organism metabolic process;response to toxic substance;cellular oxidant detoxification;single-organism catabolic process;cellular process;reactive oxygen species metabolic process;response to stress;biological_process;metabolic…	3;5;4;4;2;2;3;4;4;4;2;4;3;1;2;3;4;3;4;4;5;5;3;3;2;	GO:0005737;GO:0005829;GO:0044464;GO:0005623;GO:0005622;GO:0005575;GO:0044444;GO:0044424;	cytoplasm;cytosol;cell part;cell;intracellular;cellular_component;cytoplasmic part;intracellular part;	4;5;2;2;3;1;4;3;	GO:0003674;GO:0005488;GO:1901363;GO:0016491;GO:0043169;GO:0043167;GO:0016684;GO:0004601;GO:0020037;GO:0016209;GO:0003824;GO:0046872;GO:0046906;GO:0097159;GO:0004096;	molecular_function;binding;heterocyclic compound binding;oxidoreductase activity;cation binding;ion binding;oxidoreductase activity, acting on peroxide as acceptor;peroxidase activity;heme binding;antioxidant activity;catalytic activity;metal ion binding;tetrapyrrole binding;organic cyclic compound binding;catalase activity;	1;2;3;3;4;3;4;3;5;2;2;5;4;3;4;	K03781	map00380;map00630;map01110;map01130;map01200;map04011;map04068;map04146;map04211;map04212;map04213;map05014;	Tryptophan metabolism;Glyoxylate and dicarboxylate metabolism;Biosynthesis of secondary metabolites;Biosynthesis of antibiotics;Carbon metabolism;MAPK signaling pathway - yeast;FoxO signaling pathway;Peroxisome;Longevity regulating pathway;Longevity regulating pathway - worm;Longevity regulating pathway - multiple species;Amyotrophic lateral sclerosis (ALS);	IPR002226;IPR024712;IPR029062;IPR024708;IPR018028;IPR010582;IPR020835;IPR011614;	Catalase haem-binding site;Catalase, mono-functional, haem-containing, clade 2;Class I glutamine amidotransferase-like;Catalase active site;Catalase, mono-functional, haem-containing;Catalase immune-responsive domain;Catalase-like domain;Catalase core domain;	extracellular	291302759	610	P	[P] Inorganic ion transport and metabolism;	COG0753	Catalase
T5A9I4	Alcohol dehydrogenase superfamily, zinc-type OS=Ophiocordyceps sinensis (strain Co18 / CGMCC 3.14243) OX=911162 GN=OCS_05039 PE=3 SV=1	0.94	0.8	1.275	1.516	0.578	1.028	1.385	0.582	1.048	1.446	0.785	1.331	1.92604	0.00447588	0.58629	0.00271487	1.12922	0.356226				GO:0005737;GO:0044464;GO:0005623;GO:0005622;GO:0005575;GO:0044424;	cytoplasm;cell part;cell;intracellular;cellular_component;intracellular part;	4;2;2;3;1;3;	GO:0043169;GO:0046872;GO:0016614;GO:0016616;GO:0046914;GO:0003824;GO:0004022;GO:0016491;GO:0003674;GO:0005488;GO:0043167;GO:0008270;	cation binding;metal ion binding;oxidoreductase activity, acting on CH-OH group of donors;oxidoreductase activity, acting on the CH-OH group of donors, NAD or NADP as acceptor;transition metal ion binding;catalytic activity;alcohol dehydrogenase (NAD) activity;oxidoreductase activity;molecular_function;binding;ion binding;zinc ion binding;	4;5;4;5;6;2;6;3;1;2;3;7;	K13953	map00010;map00071;map00350;map00625;map00626;map00830;map00980;map00982;map01100;map01110;map01120;map01130;map01220;	Glycolysis / Gluconeogenesis;Fatty acid degradation;Tyrosine metabolism;Chloroalkane and chloroalkene degradation;Naphthalene degradation;Retinol metabolism;Metabolism of xenobiotics by cytochrome P450;Drug metabolism - cytochrome P450;Metabolic pathways;Biosynthesis of secondary metabolites;Microbial metabolism in diverse environments;Biosynthesis of antibiotics;Degradation of aromatic compounds;	IPR020843;IPR013149;IPR002328;IPR011032;IPR013154;IPR016040;	Polyketide synthase, enoylreductase domain;Alcohol dehydrogenase, C-terminal;Alcohol dehydrogenase, zinc-type, conserved site;GroES-like;Alcohol dehydrogenase, N-terminal;NAD(P)-binding domain;	cytosol	YMR083w	389	Q	[Q] Secondary metabolites biosynthesis, transport and catabolism;
T5A413	L-threonine 3-dehydrogenase OS=Ophiocordyceps sinensis (strain Co18 / CGMCC 3.14243) OX=911162 GN=OCS_06954 PE=4 SV=1	1.838	0.944	1.057	1.368	0.711	1.027	1.439	0.711	0.951	1.138	0.736	1.14	1.86428	0.00514967	0.74299	0.00792838	1.38515	0.0372588	GO:0044699;GO:0044710;GO:0071704;GO:0008150;GO:0008152;GO:0005975;GO:0055114;GO:0051704;GO:0044238;GO:0009405;	single-organism process;single-organism metabolic process;organic substance metabolic process;biological_process;metabolic process;carbohydrate metabolic process;oxidation-reduction process;multi-organism process;primary metabolic process;pathogenesis;	2;3;3;1;2;4;4;2;3;3;	GO:0042995;GO:0044464;GO:0005623;GO:0005575;	cell projection;cell part;cell;cellular_component;	3;2;2;1;	GO:0003674;GO:0008270;GO:0016491;GO:0043169;GO:0046914;GO:0052677;GO:0043167;GO:0033709;GO:0046872;GO:0003824;GO:0016614;GO:0016616;GO:0005488;	molecular_function;zinc ion binding;oxidoreductase activity;cation binding;transition metal ion binding;D-arabinitol dehydrogenase, D-xylulose forming (NADP+) activity;ion binding;D-arabinitol dehydrogenase, D-ribulose forming (NADP+) activity;metal ion binding;catalytic activity;oxidoreductase activity, acting on CH-OH group of donors;oxidoreductase activity, acting on the CH-OH group of donors,…	1;7;3;4;6;6;3;6;5;2;4;5;2;	K17818	map00040;map01100;	Pentose and glucuronate interconversions;Metabolic pathways;	IPR013149;IPR016040;	Alcohol dehydrogenase, C-terminal;NAD(P)-binding domain;	cytosol	269839298	88.6	ER	[E] Amino acid transport and metabolism; [R] General function prediction only;	COG1063	Threonine dehydrogenase or related Zn-dependent dehydrogenase
T5AFX3	Nor-1 OS=Ophiocordyceps sinensis (strain Co18 / CGMCC 3.14243) OX=911162 GN=OCS_02969 PE=4 SV=1	1.583	1.002	1.151	1.326	0.954	1.206	1.239	0.971	1.232	1.799	0.741	1.065	1.62132	0.00666033	0.78814	0.0125164	1.27783	0.0503652	GO:0043386;GO:0044249;GO:0043385;GO:0046222;GO:1901362;GO:0044699;GO:1901576;GO:0044710;GO:0044711;GO:0044550;GO:0071704;GO:1901360;GO:0018130;GO:0009987;GO:0019748;GO:0009058;GO:0008150;GO:0009404;GO:0008152;GO:1901376;GO:0046483;GO:0045122;GO:0009403;GO:0044237;GO:0044763;GO:1901378;	mycotoxin biosynthetic process;cellular biosynthetic process;mycotoxin metabolic process;aflatoxin metabolic process;organic cyclic compound biosynthetic process;single-organism process;organic substance biosynthetic process;single-organism metabolic process;single-organism biosynthetic process;secondary metabolite biosynthetic process;organic substance metabolic process;organic cyclic compound m…	6;4;5;6;5;2;4;3;4;5;3;4;5;2;4;3;1;4;2;5;4;7;5;3;3;6;				GO:0003674;GO:0016491;GO:0003824;GO:0016614;GO:0016616;	molecular_function;oxidoreductase activity;catalytic activity;oxidoreductase activity, acting on CH-OH group of donors;oxidoreductase activity, acting on the CH-OH group of donors, NAD or NADP as acceptor;	1;3;2;4;5;				IPR002347;IPR016040;	Short-chain dehydrogenase/reductase SDR;NAD(P)-binding domain;	mitochondria	89901214	74.7	R	[R] General function prediction only;	COG0300	Short-chain dehydrogenase
T5AHW7	Flavin-containing monooxygenase OS=Ophiocordyceps sinensis (strain Co18 / CGMCC 3.14243) OX=911162 GN=OCS_02938 PE=4 SV=1	1.327	1.018	0.83	1.719	0.945	0.799	1.531	0.985	0.739	1.412	0.984	0.885	1.52314	0.000996049	1.20873	0.00244684	1.84107	0.00027407	GO:0044249;GO:0044710;GO:0065007;GO:0044699;GO:0065008;GO:0042445;GO:0009987;GO:0042446;GO:0010817;GO:0009058;GO:0008152;GO:0055114;GO:0044237;GO:0009850;GO:0009851;GO:0008150;	cellular biosynthetic process;single-organism metabolic process;biological regulation;single-organism process;regulation of biological quality;hormone metabolic process;cellular process;hormone biosynthetic process;regulation of hormone levels;biosynthetic process;metabolic process;oxidation-reduction process;cellular metabolic process;auxin metabolic process;auxin biosynthetic process;biological…	4;3;2;2;3;3;2;4;4;3;2;4;3;4;5;1;				GO:0004497;GO:0004499;GO:0003674;GO:0005488;GO:0043167;GO:1901363;GO:1901265;GO:0016491;GO:0043168;GO:0050662;GO:0050661;GO:0050660;GO:0016709;GO:0016705;GO:0000166;GO:0036094;GO:0003824;GO:0048037;GO:0097159;	monooxygenase activity;N,N-dimethylaniline monooxygenase activity;molecular_function;binding;ion binding;heterocyclic compound binding;nucleoside phosphate binding;oxidoreductase activity;anion binding;coenzyme binding;NADP binding;flavin adenine dinucleotide binding;oxidoreductase activity, acting on paired donors, with incorporation or reduction of molecular oxygen, NAD(P)H as one donor, and in…	4;6;1;2;3;3;4;3;4;4;5;5;5;4;4;3;2;3;3;				IPR023753;	FAD/NAD(P)-binding domain;	cytosol	111022661	535	P	[P] Inorganic ion transport and metabolism;	COG2072	Predicted flavoprotein CzcO associated with the cation diffusion facilitator CzcD
T5ABX3	NAD(P)-binding domain protein OS=Ophiocordyceps sinensis (strain Co18 / CGMCC 3.14243) OX=911162 GN=OCS_04375 PE=4 SV=1	2.243	0.969	0.561	1.077	1.057	0.601	1.469	0.922	0.509	1.474	0.699	0.868	1.7173	0.0430876	1.43639	0.0461119	2.46672	0.0110489	GO:0018964;GO:0006805;GO:0009410;GO:0044237;GO:0070887;GO:0042178;GO:0051716;GO:1900673;GO:0071704;GO:0009987;GO:1901575;GO:0008150;GO:0008152;GO:0042221;GO:0009056;GO:0044248;GO:0043451;GO:0050896;GO:0043449;GO:0042208;GO:0071466;	propylene metabolic process;xenobiotic metabolic process;response to xenobiotic stimulus;cellular metabolic process;cellular response to chemical stimulus;xenobiotic catabolic process;cellular response to stimulus;olefin metabolic process;organic substance metabolic process;cellular process;organic substance catabolic process;biological_process;metabolic process;response to chemical;catabolic pro…	5;4;4;3;4;5;3;4;3;2;4;1;2;3;3;4;5;2;4;6;5;				GO:0003674;GO:0050574;GO:0016491;GO:0003824;GO:0016614;GO:0016616;	molecular_function;2-(R)-hydroxypropyl-CoM dehydrogenase activity;oxidoreductase activity;catalytic activity;oxidoreductase activity, acting on CH-OH group of donors;oxidoreductase activity, acting on the CH-OH group of donors, NAD or NADP as acceptor;	1;6;3;2;4;5;				IPR002347;IPR016040;IPR020904;	Short-chain dehydrogenase/reductase SDR;NAD(P)-binding domain;Short-chain dehydrogenase/reductase, conserved site;	mitochondria	111026247	227	IQR	[I] Lipid transport and metabolism; [Q] Secondary metabolites biosynthesis, transport and catabolism; [R] General function prediction only;	COG1028	NAD(P)-dependent dehydrogenase, short-chain alcohol dehydrogenase family
T5ACE9	WSC domain containing protein OS=Ophiocordyceps sinensis (strain Co18 / CGMCC 3.14243) OX=911162 GN=OCS_04190 PE=3 SV=1	1.889	0.762	0.822	1.56	0.815	0.791	1.527	0.818	1.111	1.428	1.049	0.806	1.85946	0.000789022	0.97564	0.836357	1.81416	0.00125092	GO:0050896;GO:0006950;GO:0006979;GO:0008150;	response to stimulus;response to stress;response to oxidative stress;biological_process;	2;3;4;1;	GO:0005575;GO:0005576;	cellular_component;extracellular region;	1;2;	GO:0020037;GO:0046906;GO:0097159;GO:0016209;GO:1901363;GO:0003824;GO:0003674;GO:0005488;GO:0016684;GO:0004601;GO:0016491;	heme binding;tetrapyrrole binding;organic cyclic compound binding;antioxidant activity;heterocyclic compound binding;catalytic activity;molecular_function;binding;oxidoreductase activity, acting on peroxide as acceptor;peroxidase activity;oxidoreductase activity;	5;4;3;2;3;2;1;2;4;3;3;				IPR002889;IPR010255;IPR002207;IPR002016;	Carbohydrate-binding WSC;Haem peroxidase;Plant ascorbate peroxidase;Haem peroxidase, plant/fungal/bacterial;	extracellular	At4g35970	83.6	R	[R] General function prediction only;
T5A9T9	AhpC/TSA family protein OS=Ophiocordyceps sinensis (strain Co18 / CGMCC 3.14243) OX=911162 GN=OCS_05766 PE=4 SV=1	1.649	1.163	0.703	nan	nan	nan	2.886	0.816	0.333	1.961	1.101	0.688	2.10908	0.0421265	1.78654	0.0487466	3.76798	0.0151939	GO:0090087;GO:0033157;GO:0051169;GO:0008104;GO:0019220;GO:0080090;GO:0019222;GO:0060249;GO:0051049;GO:0032386;GO:0048583;GO:0007165;GO:0044707;GO:0023014;GO:0044712;GO:0051716;GO:0001895;GO:0070727;GO:0009966;GO:0002262;GO:0000165;GO:0098869;GO:0001909;GO:0001906;GO:0033036;GO:0043122;GO:0042325;GO:0006793;GO:0060255;GO:0006606;GO:0006605;GO:0045184;GO:1990748;GO:0010035;GO:0042990;GO:0042991;GO:…	regulation of peptide transport;regulation of intracellular protein transport;nuclear transport;protein localization;regulation of phosphate metabolic process;regulation of primary metabolic process;regulation of metabolic process;anatomical structure homeostasis;regulation of transport;regulation of intracellular transport;regulation of response to stimulus;signal transduction;single-multicellul…	5;6;6;4;6;4;3;5;4;5;3;4;3;4;4;3;6;4;4;3;5;4;3;2;3;6;7;4;4;5;6;4;3;4;7;6;5;3;5;4;4;2;4;4;6;4;5;6;5;4;5;5;2;5;5;5;4;6;7;6;2;3;5;6;4;3;3;4;3;5;1;2;3;6;3;6;5;2;3;5;5;7;8;6;5;6;2;7;3;4;2;4;5;5;5;5;5;4;6;4;6;5;5;5;4;6;6;5;5;3;4;6;3;5;6;6;4;7;4;4;4;4;2;3;4;4;2;5;3;5;4;7;2;4;5;6;7;6;5;5;4;6;3;4;4;5;3;2;3;3;4;3;7;6;6;3;5;3;5;5;4;	GO:0031982;GO:0005615;GO:0043230;GO:0043231;GO:0044421;GO:0044464;GO:0043229;GO:0043227;GO:0043226;GO:0044424;GO:0043209;GO:0044444;GO:0005737;GO:0005634;GO:0005739;GO:0005623;GO:0005622;GO:0070062;GO:1903561;GO:0005575;GO:0005576;	vesicle;extracellular space;extracellular organelle;intracellular membrane-bounded organelle;extracellular region part;cell part;intracellular organelle;membrane-bounded organelle;organelle;intracellular part;myelin sheath;cytoplasmic part;cytoplasm;nucleus;mitochondrion;cell;intracellular;extracellular exosome;extracellular vesicle;cellular_component;extracellular region;	4;3;3;4;2;2;3;3;2;3;3;4;4;5;5;2;3;4;3;1;2;	GO:0016209;GO:0016684;GO:0008379;GO:0003676;GO:1901363;GO:0003824;GO:0097159;GO:0004601;GO:0044822;GO:0003723;GO:0003674;GO:0005488;GO:0051920;GO:0016491;	antioxidant activity;oxidoreductase activity, acting on peroxide as acceptor;thioredoxin peroxidase activity;nucleic acid binding;heterocyclic compound binding;catalytic activity;organic cyclic compound binding;peroxidase activity;poly(A) RNA binding;RNA binding;molecular_function;binding;peroxiredoxin activity;oxidoreductase activity;	2;4;4;4;3;2;3;3;6;5;1;2;3;3;	K03386	map04214;	Apoptosis - fly;	IPR000866;IPR019479;IPR013766;IPR012336;	Alkyl hydroperoxide reductase subunit C/ Thiol specific antioxidant;Peroxiredoxin, C-terminal;Thioredoxin domain;Thioredoxin-like fold;	cytosol	Hs4505591	266	O	[O] Posttranslational modification, protein turnover, chaperones;
T5ADL3	C-1-tetrahydrofolate synthase OS=Ophiocordyceps sinensis (strain Co18 / CGMCC 3.14243) OX=911162 GN=OCS_03776 PE=3 SV=1	2.581	0.888	0.649	1.614	1.004	0.808	1.732	1.028	0.652	1.141	0.974	0.95	1.81511	0.0389314	1.27297	0.0371685	2.31056	0.0174723	GO:0051188;GO:0009165;GO:0044281;GO:0044283;GO:1901362;GO:1901360;GO:0044710;GO:0044711;GO:0042440;GO:0043650;GO:0006767;GO:0006766;GO:0006760;GO:0000097;GO:0000096;GO:0043436;GO:0046483;GO:0043648;GO:1901564;GO:0006575;GO:1901566;GO:0016053;GO:0006163;GO:0006164;GO:0019438;GO:0042398;GO:0006807;GO:0009066;GO:0046653;GO:0046655;GO:0046654;GO:0046656;GO:1901576;GO:0051186;GO:0035999;GO:0042558;GO:…	cofactor biosynthetic process;nucleotide biosynthetic process;small molecule metabolic process;small molecule biosynthetic process;organic cyclic compound biosynthetic process;organic cyclic compound metabolic process;single-organism metabolic process;single-organism biosynthetic process;pigment metabolic process;dicarboxylic acid biosynthetic process;water-soluble vitamin metabolic process;vitam…	5;6;4;5;5;4;3;4;4;7;6;5;5;6;5;5;4;7;4;4;5;5;6;7;5;5;3;6;6;6;7;6;4;4;5;5;6;4;5;1;2;5;5;5;5;5;6;5;6;5;6;5;4;4;4;8;2;4;6;7;5;6;2;4;4;6;4;5;5;5;7;7;6;6;5;5;6;6;4;3;5;6;5;3;4;3;3;6;3;5;4;4;6;	GO:0005829;GO:0044424;GO:0044444;GO:0005737;GO:0044464;GO:0005623;GO:0005622;GO:0005575;	cytosol;intracellular part;cytoplasmic part;cytoplasm;cell part;cell;intracellular;cellular_component;	5;3;4;4;2;2;3;1;	GO:1901363;GO:0000166;GO:0035639;GO:0017076;GO:0097367;GO:0016814;GO:0016810;GO:0003674;GO:0003676;GO:0003677;GO:1901265;GO:0019238;GO:0032549;GO:0005524;GO:0016787;GO:0003824;GO:0016879;GO:0097159;GO:0032559;GO:0032555;GO:0032553;GO:0016491;GO:0004329;GO:0036094;GO:0043167;GO:0003697;GO:0030554;GO:0032550;GO:0005488;GO:0001883;GO:0001882;GO:0016646;GO:0016645;GO:0004488;GO:0016874;GO:0004477;GO:…	heterocyclic compound binding;nucleotide binding;purine ribonucleoside triphosphate binding;purine nucleotide binding;carbohydrate derivative binding;hydrolase activity, acting on carbon-nitrogen (but not peptide) bonds, in cyclic amidines;hydrolase activity, acting on carbon-nitrogen (but not peptide) bonds;molecular_function;nucleic acid binding;DNA binding;nucleoside phosphate binding;cyclohyd…	3;4;5;5;3;5;4;1;4;5;4;6;5;6;3;2;4;3;6;5;4;3;5;3;3;6;6;6;2;5;4;5;4;6;3;7;4;	K00288	map00670;map01100;	One carbon pool by folate;Metabolic pathways;	IPR000559;IPR020867;IPR027417;IPR000672;IPR020628;IPR020631;IPR020630;IPR016040;	Formate-tetrahydrofolate ligase, FTHFS;Tetrahydrofolate dehydrogenase/cyclohydrolase, conserved site;P-loop containing nucleoside triphosphate hydrolase;Tetrahydrofolate dehydrogenase/cyclohydrolase;Formate-tetrahydrofolate ligase, FTHFS, conserved site;Tetrahydrofolate dehydrogenase/cyclohydrolase, NAD(P)-binding domain;Tetrahydrofolate dehydrogenase/cyclohydrolase, catalytic domain;NAD(P)-bindi…	mitochondria	SPBC839.16	1172	H	[H] Coenzyme transport and metabolism;

## Sheet: Sheet2
Table S8 The oxidation−reduction related DAPs in different clusters (raw data for Fig.5)
cluster1
Protein	Description	ST_1	ST_2	ST_3	ST_4	PR_1	PR_2	PR_3	PR_4	MF_1	MF_2	MF_3	MF_4	ST-vs-PR	ST-vs-PR-p	PR-vs-MF	PR-vs-MF-p	ST-vs-MF	ST-vs-MF-p	BP_GO_ID	BP_GO_Desc	BP_GO_Level	CC_GO_ID	CC_GO_Desc	CC_GO_Level	MF_GO_ID	MF_GO_Desc	MF_GO_Level	KEGG_KO	KEGG_Pathway_ID	KEGG_Pathway_Desc	Domain_ID	Domain_Desc	SubcellurLocation	COG_Gene	BlastScore	COG_Code	COG_Desc
T5AHD1	Electron transport protein OS=Ophiocordyceps sinensis (strain Co18 / CGMCC 3.14243) OX=911162 GN=OCS_03142 PE=4 SV=1	0.535	nan	nan	0.63	1.252	nan	nan	1.187	1.017	nan	nan	1.591	0.477655	0.00806489	0.9352	0.797421	0.4467	0.131298	GO:0055070;GO:0055076;GO:0098771;GO:0071840;GO:0098869;GO:0019725;GO:1990748;GO:0048878;GO:0022607;GO:0006825;GO:0017004;GO:0098754;GO:0051775;GO:0046916;GO:0016043;GO:0065003;GO:0065007;GO:0065008;GO:0006812;GO:0006811;GO:0006810;GO:0008150;GO:0051234;GO:0050896;GO:0070271;GO:0050801;GO:0044699;GO:0000041;GO:0006878;GO:0006875;GO:0009987;GO:0006873;GO:0030001;GO:0030003;GO:0055080;GO:0055082;GO:…	copper ion homeostasis;transition metal ion homeostasis;inorganic ion homeostasis;cellular component organization or biogenesis;cellular oxidant detoxification;cellular homeostasis;cellular detoxification;chemical homeostasis;cellular component assembly;copper ion transport;cytochrome complex assembly;detoxification;response to redox state;cellular transition metal ion homeostasis;cellular compon…	10;9;7;2;4;4;3;5;4;9;7;2;3;9;3;5;2;3;6;5;4;1;3;2;4;6;2;8;10;8;2;6;7;7;7;5;8;4;4;6;5;4;5;4;3;8;3;6;2;3;3;	GO:0031975;GO:0016021;GO:0016020;GO:0031967;GO:0031966;GO:0043231;GO:0044429;GO:0044424;GO:0044425;GO:0044422;GO:0044464;GO:0043229;GO:0043227;GO:0043226;GO:0031224;GO:0044446;GO:0044444;GO:0005737;GO:0031090;GO:0005739;GO:0019866;GO:0005623;GO:0005743;GO:0005740;GO:0005622;GO:0005575;	envelope;integral component of membrane;membrane;organelle envelope;mitochondrial membrane;intracellular membrane-bounded organelle;mitochondrial part;intracellular part;membrane part;organelle part;cell part;intracellular organelle;membrane-bounded organelle;organelle;intrinsic component of membrane;intracellular organelle part;cytoplasmic part;cytoplasm;organelle membrane;mitochondrion;organell…	3;4;2;4;4;4;4;3;2;2;2;3;3;2;3;3;4;4;3;5;4;2;5;5;3;1;	GO:0008379;GO:0046872;GO:0016209;GO:0016684;GO:0003674;GO:0005488;GO:0046914;GO:0003824;GO:0004601;GO:0016491;GO:0043169;GO:0043167;GO:0005507;GO:0051920;	thioredoxin peroxidase activity;metal ion binding;antioxidant activity;oxidoreductase activity, acting on peroxide as acceptor;molecular_function;binding;transition metal ion binding;catalytic activity;peroxidase activity;oxidoreductase activity;cation binding;ion binding;copper ion binding;peroxiredoxin activity;	4;5;2;4;1;2;6;2;3;3;4;3;7;3;	K07152			IPR003782;IPR017276;IPR012336;	Copper chaperone SCO1/SenC;Synthesis of cytochrome c oxidase, Sco1/Sco2;Thioredoxin-like fold;	mitochondria	YBR037c	251	C	[C] Energy production and conversion;
T5AA56	Aldehyde dehydrogenase domain protein OS=Ophiocordyceps sinensis (strain Co18 / CGMCC 3.14243) OX=911162 GN=OCS_04811 PE=4 SV=1	0.858	0.968	1.448	1.146	1.214	0.962	0.799	0.922	1.476	1.348	1.137	1.258	1.13421	0.432678	0.74669	0.0262586	0.84691	0.224091	GO:0009065;GO:0044237;GO:0019752;GO:0006540;GO:0044248;GO:0006807;GO:0044281;GO:0044282;GO:0009064;GO:0006536;GO:0044699;GO:0006105;GO:0044710;GO:0006520;GO:0071704;GO:1901605;GO:1901606;GO:0044712;GO:0009448;GO:0044238;GO:0009987;GO:1901575;GO:0032787;GO:0008150;GO:0008152;GO:0072329;GO:0043436;GO:0009056;GO:0043649;GO:0009063;GO:0043648;GO:1901564;GO:1901565;GO:0006082;GO:0046395;GO:0044763;GO:…	glutamine family amino acid catabolic process;cellular metabolic process;carboxylic acid metabolic process;glutamate decarboxylation to succinate;cellular catabolic process;nitrogen compound metabolic process;small molecule metabolic process;small molecule catabolic process;glutamine family amino acid metabolic process;glutamate metabolic process;single-organism process;succinate metabolic proces…	7;3;6;9;4;3;4;5;6;7;2;8;3;4;3;5;6;4;5;3;2;4;7;1;2;7;5;3;7;5;7;4;5;4;6;3;6;8;5;	GO:0005737;GO:0005829;GO:0044464;GO:0005623;GO:0005622;GO:0005575;GO:0044444;GO:0044424;	cytoplasm;cytosol;cell part;cell;intracellular;cellular_component;cytoplasmic part;intracellular part;	4;5;2;2;3;1;4;3;	GO:0003674;GO:0016491;GO:0016620;GO:0003824;GO:0016903;GO:0009013;	molecular_function;oxidoreductase activity;oxidoreductase activity, acting on the aldehyde or oxo group of donors, NAD or NADP as acceptor;catalytic activity;oxidoreductase activity, acting on the aldehyde or oxo group of donors;succinate-semialdehyde dehydrogenase [NAD(P)+] activity;	1;3;5;2;4;6;	K00135	map00250;map00310;map00350;map00650;map00760;map01100;map01120;	Alanine, aspartate and glutamate metabolism;Lysine degradation;Tyrosine metabolism;Butanoate metabolism;Nicotinate and nicotinamide metabolism;Metabolic pathways;Microbial metabolism in diverse environments;	IPR016162;IPR015590;IPR016161;	Aldehyde dehydrogenase N-terminal domain;Aldehyde dehydrogenase domain;Aldehyde/histidinol dehydrogenase;	cytosol	SPAC1002.12c	283	C	[C] Energy production and conversion;
T5AE75	Pyridine nucleotide-disulfide oxidoreductase OS=Ophiocordyceps sinensis (strain Co18 / CGMCC 3.14243) OX=911162 GN=OCS_04170 PE=4 SV=1	1.045	0.68	0.379	0.633	0.962	1.057	1.166	0.97	1.35	1.611	1.697	1.922	0.658722	0.0504077	0.63146	0.00313029	0.41596	0.00182107				GO:0005575;GO:0005576;	cellular_component;extracellular region;	1;2;	GO:0016209;GO:0003824;GO:0003674;GO:0016651;GO:0016667;GO:0016668;GO:0004791;GO:0016491;	antioxidant activity;catalytic activity;molecular_function;oxidoreductase activity, acting on NAD(P)H;oxidoreductase activity, acting on a sulfur group of donors;oxidoreductase activity, acting on a sulfur group of donors, NAD(P) as acceptor;thioredoxin-disulfide reductase activity;oxidoreductase activity;	2;2;1;4;4;5;3;3;				IPR000103;IPR023753;	Pyridine nucleotide-disulphide oxidoreductase, class-II;FAD/NAD(P)-binding domain;	cytosol	436838080	111	O	[O] Posttranslational modification, protein turnover, chaperones;	COG0492	Thioredoxin reductase
T5AJH5	Superoxide dismutase OS=Ophiocordyceps sinensis (strain Co18 / CGMCC 3.14243) OX=911162 GN=OCS_01730 PE=3 SV=1	0.572	0.853	0.195	1.141	1.072	1.001	1.048	0.952	1.371	1.483	2.109	1.356	0.677879	0.158286	0.64456	0.0208914	0.43694	0.0164144	GO:0080090;GO:0019222;GO:2000112;GO:1901362;GO:1901360;GO:0051716;GO:0098869;GO:0060255;GO:1990748;GO:2001141;GO:0010035;GO:0046483;GO:0001306;GO:0019430;GO:0033554;GO:0019438;GO:0034645;GO:0000305;GO:0000303;GO:0000302;GO:0006807;GO:0098754;GO:0050789;GO:0097659;GO:0001315;GO:1901576;GO:0071451;GO:0071450;GO:0065007;GO:0006366;GO:0018130;GO:0009889;GO:0044710;GO:0006950;GO:0008150;GO:0008152;GO:…	regulation of primary metabolic process;regulation of metabolic process;regulation of cellular macromolecule biosynthetic process;organic cyclic compound biosynthetic process;organic cyclic compound metabolic process;cellular response to stimulus;cellular oxidant detoxification;regulation of macromolecule metabolic process;cellular detoxification;regulation of RNA biosynthetic process;response to…	4;3;6;5;4;3;4;4;3;6;4;4;5;4;4;5;5;5;6;5;3;2;2;7;6;4;7;6;2;7;5;4;3;3;1;2;5;3;5;5;2;6;5;6;6;4;4;4;2;4;2;5;2;4;4;7;4;4;5;4;5;5;4;5;4;4;3;5;7;5;5;6;3;3;5;3;4;3;5;4;3;4;3;	GO:0031974;GO:0043231;GO:0043233;GO:0044429;GO:0044424;GO:0044422;GO:0043229;GO:0005622;GO:0043227;GO:0044446;GO:0044444;GO:0005737;GO:0005739;GO:0044464;GO:0005623;GO:0043226;GO:0005759;GO:0005575;GO:0070013;	membrane-enclosed lumen;intracellular membrane-bounded organelle;organelle lumen;mitochondrial part;intracellular part;organelle part;intracellular organelle;intracellular;membrane-bounded organelle;intracellular organelle part;cytoplasmic part;cytoplasm;mitochondrion;cell part;cell;organelle;mitochondrial matrix;cellular_component;intracellular organelle lumen;	2;4;3;4;3;2;3;3;3;3;4;4;5;2;2;2;5;1;4;	GO:0046872;GO:0016209;GO:0004784;GO:0003674;GO:0005488;GO:0046914;GO:0043169;GO:0030145;GO:0003824;GO:0016491;GO:0043167;GO:0016721;	metal ion binding;antioxidant activity;superoxide dismutase activity;molecular_function;binding;transition metal ion binding;cation binding;manganese ion binding;catalytic activity;oxidoreductase activity;ion binding;oxidoreductase activity, acting on superoxide radicals as acceptor;	5;2;3;1;2;6;4;7;2;3;3;4;	K04564	map04068;map04146;map04211;map04212;map04213;map05016;	FoxO signaling pathway;Peroxisome;Longevity regulating pathway;Longevity regulating pathway - worm;Longevity regulating pathway - multiple species;Huntington's disease;	IPR001189;IPR019831;IPR019833;IPR019832;	Manganese/iron superoxide dismutase;Manganese/iron superoxide dismutase, N-terminal;Manganese/iron superoxide dismutase, binding site;Manganese/iron superoxide dismutase, C-terminal;	mitochondria	Hs10835187	243	P	[P] Inorganic ion transport and metabolism;
T5A8U4	Bli-3 OS=Ophiocordyceps sinensis (strain Co18 / CGMCC 3.14243) OX=911162 GN=OCS_05450 PE=4 SV=1	0.966	0.704	1.027	1.131	1.053	1.15	1.12	0.929	1.542	1.621	1.396	1.257	0.900284	0.34456	0.73109	0.00603178	0.65818	0.00641914							GO:0097367;GO:0097159;GO:1901265;GO:0000166;GO:0036094;GO:0003824;GO:0003674;GO:0005488;GO:0010181;GO:0048037;GO:1901363;GO:0032553;GO:0016491;	carbohydrate derivative binding;organic cyclic compound binding;nucleoside phosphate binding;nucleotide binding;small molecule binding;catalytic activity;molecular_function;binding;FMN binding;cofactor binding;heterocyclic compound binding;ribonucleotide binding;oxidoreductase activity;	3;3;4;4;3;2;1;2;4;3;3;4;3;				IPR012349;	FMN-binding split barrel;	cytosol	159898212	73.9	S	[S] Function unknown;	COG3871	General stress protein 26 (function unknown)
cluster 2
Protein	Description	ST_1	ST_2	ST_3	ST_4	PR_1	PR_2	PR_3	PR_4	MF_1	MF_2	MF_3	MF_4	ST-vs-PR	ST-vs-PR-p	PR-vs-MF	PR-vs-MF-p	ST-vs-MF	ST-vs-MF-p	BP_GO_ID	BP_GO_Desc	BP_GO_Level	CC_GO_ID	CC_GO_Desc	CC_GO_Level	MF_GO_ID	MF_GO_Desc	MF_GO_Level	KEGG_KO	KEGG_Pathway_ID	KEGG_Pathway_Desc	Domain_ID	Domain_Desc	SubcellurLocation	COG_Gene	BlastScore	COG_Code	COG_Desc
T5A9Z5	Acetohydroxy acid isomeroreductase OS=Ophiocordyceps sinensis (strain Co18 / CGMCC 3.14243) OX=911162 GN=OCS_05057 PE=3 SV=1	1.061	0.986	1.287	0.89	1.112	1.279	1.041	1.288	0.957	0.9	0.824	0.815	0.894919	0.28058	1.35011	0.00474138	1.20824	0.0924469	GO:0019752;GO:0044249;GO:0006807;GO:0044281;GO:0044283;GO:0044699;GO:1901576;GO:0044710;GO:0044711;GO:0006549;GO:0006520;GO:0071704;GO:0009099;GO:0009097;GO:1901605;GO:1901607;GO:0008652;GO:0009987;GO:0009058;GO:0008150;GO:0008152;GO:0043436;GO:0044238;GO:0006573;GO:1901564;GO:0006082;GO:1901566;GO:0046394;GO:0016053;GO:0044237;GO:0044763;GO:0009081;GO:0009082;	carboxylic acid metabolic process;cellular biosynthetic process;nitrogen compound metabolic process;small molecule metabolic process;small molecule biosynthetic process;single-organism process;organic substance biosynthetic process;single-organism metabolic process;single-organism biosynthetic process;isoleucine metabolic process;cellular amino acid metabolic process;organic substance metabolic p…	6;4;3;4;5;2;4;3;4;6;4;3;7;7;5;6;5;2;3;1;2;5;3;6;4;4;5;6;5;3;3;5;6;	GO:0043229;GO:0043227;GO:0043226;GO:0005737;GO:0005623;GO:0005739;GO:0043231;GO:0044464;GO:0005622;GO:0005575;GO:0044444;GO:0044424;	intracellular organelle;membrane-bounded organelle;organelle;cytoplasm;cell;mitochondrion;intracellular membrane-bounded organelle;cell part;intracellular;cellular_component;cytoplasmic part;intracellular part;	3;3;2;4;2;5;4;2;3;1;4;3;	GO:0005488;GO:0043169;GO:0003674;GO:0016491;GO:0016616;GO:0043167;GO:0046872;GO:0003824;GO:0016614;GO:0004455;	binding;cation binding;molecular_function;oxidoreductase activity;oxidoreductase activity, acting on the CH-OH group of donors, NAD or NADP as acceptor;ion binding;metal ion binding;catalytic activity;oxidoreductase activity, acting on CH-OH group of donors;ketol-acid reductoisomerase activity;	2;4;1;3;5;3;5;2;4;6;	K00053	map00290;map00770;map01100;map01110;map01130;map01210;map01230;	Valine, leucine and isoleucine biosynthesis;Pantothenate and CoA biosynthesis;Metabolic pathways;Biosynthesis of secondary metabolites;Biosynthesis of antibiotics;2-Oxocarboxylic acid metabolism;Biosynthesis of amino acids;	IPR013116;IPR008927;IPR016207;IPR000506;IPR013328;IPR016040;IPR013023;	Acetohydroxy acid isomeroreductase, NADPH-binding domain;6-phosphogluconate dehydrogenase C-terminal domain-like;Ketol-acid reductoisomerase, fungi;Acetohydroxy acid isomeroreductase C-terminal;6-phosphogluconate dehydrogenase, domain 2;NAD(P)-binding domain;Ketol-acid reductoisomerase;	mitochondria	375143470	425	EH	[E] Amino acid transport and metabolism; [H] Coenzyme transport and metabolism;	COG0059	Ketol-acid reductoisomerase
T5AKS6	Formate dehydrogenase OS=Ophiocordyceps sinensis (strain Co18 / CGMCC 3.14243) OX=911162 GN=OCS_01102 PE=3 SV=1	1.15	1.164	1.219	1.064	1.695	1.356	1.207	1.318	0.602	0.818	0.825	1.003	0.824429	0.067688	1.71675	0.00475747	1.41533	0.00867846	GO:0019752;GO:0044248;GO:0044282;GO:0044710;GO:0071704;GO:0044699;GO:0044712;GO:0009987;GO:1901575;GO:0032787;GO:0015942;GO:0008152;GO:0072329;GO:0043436;GO:0009056;GO:0042183;GO:0006082;GO:0044763;GO:0046395;GO:0008150;GO:0044237;GO:0016054;GO:0044281;	carboxylic acid metabolic process;cellular catabolic process;small molecule catabolic process;single-organism metabolic process;organic substance metabolic process;single-organism process;single-organism catabolic process;cellular process;organic substance catabolic process;monocarboxylic acid metabolic process;formate metabolic process;metabolic process;monocarboxylic acid catabolic process;oxoa…	6;4;5;3;3;2;4;2;4;7;8;2;7;5;3;8;4;3;6;1;3;5;4;	GO:0005737;GO:0005829;GO:0044464;GO:0005623;GO:0005622;GO:0005575;GO:0044444;GO:0044424;	cytoplasm;cytosol;cell part;cell;intracellular;cellular_component;cytoplasmic part;intracellular part;	4;5;2;2;3;1;4;3;	GO:0051287;GO:0016620;GO:0003674;GO:0005488;GO:1901363;GO:1901265;GO:0016491;GO:0050662;GO:0016616;GO:0000166;GO:0036094;GO:0003824;GO:0048037;GO:0008863;GO:0016614;GO:0097159;GO:0016903;	NAD binding;oxidoreductase activity, acting on the aldehyde or oxo group of donors, NAD or NADP as acceptor;molecular_function;binding;heterocyclic compound binding;nucleoside phosphate binding;oxidoreductase activity;coenzyme binding;oxidoreductase activity, acting on the CH-OH group of donors, NAD or NADP as acceptor;nucleotide binding;small molecule binding;catalytic activity;cofactor binding;…	5;5;1;2;3;4;3;4;5;4;3;2;3;6;4;3;4;	K00122	map00630;map00680;map01100;map01120;map01200;	Glyoxylate and dicarboxylate metabolism;Methane metabolism;Metabolic pathways;Microbial metabolism in diverse environments;Carbon metabolism;	IPR006140;IPR033689;IPR029753;IPR029752;IPR006139;IPR016040;	D-isomer specific 2-hydroxyacid dehydrogenase, NAD-binding domain;NAD-dependent formate dehydrogenase;D-isomer specific 2-hydroxyacid dehydrogenase, NAD-binding domain conserved site;D-isomer specific 2-hydroxyacid dehydrogenase, NAD-binding domain conserved site 1;D-isomer specific 2-hydroxyacid dehydrogenase, catalytic domain;NAD(P)-binding domain;	mitochondria	YOR388c	427	C	[C] Energy production and conversion;
T5A735	Cytochrome P450 OS=Ophiocordyceps sinensis (strain Co18 / CGMCC 3.14243) OX=911162 GN=OCS_03002 PE=4 SV=1	1.167	0.746	0.825	0.804	1.761	1.723	1.724	1.396	0.84	0.861	0.842	1.094	0.536343	0.00098163	1.81578	0.000412281	0.97388	0.841275	GO:0044249;GO:0045461;GO:0045460;GO:1901362;GO:0044699;GO:0044710;GO:0044711;GO:0044550;GO:0071704;GO:1901360;GO:0018130;GO:0019748;GO:1901576;GO:0009987;GO:0006725;GO:0009403;GO:0008150;GO:0009404;GO:0008152;GO:0019438;GO:1901376;GO:0046483;GO:0009058;GO:0044237;GO:0044763;GO:1901378;	cellular biosynthetic process;sterigmatocystin biosynthetic process;sterigmatocystin metabolic process;organic cyclic compound biosynthetic process;single-organism process;single-organism metabolic process;single-organism biosynthetic process;secondary metabolite biosynthetic process;organic substance metabolic process;organic cyclic compound metabolic process;heterocycle biosynthetic process;sec…	4;6;5;5;2;3;4;5;3;4;5;4;4;2;4;5;1;4;2;5;5;4;3;3;3;6;				GO:0004497;GO:0003674;GO:0005488;GO:1901363;GO:0016491;GO:0043169;GO:0046914;GO:0016705;GO:0043167;GO:0005506;GO:0046872;GO:0020037;GO:0003824;GO:0046906;GO:0097159;	monooxygenase activity;molecular_function;binding;heterocyclic compound binding;oxidoreductase activity;cation binding;transition metal ion binding;oxidoreductase activity, acting on paired donors, with incorporation or reduction of molecular oxygen;ion binding;iron ion binding;metal ion binding;heme binding;catalytic activity;tetrapyrrole binding;organic cyclic compound binding;	4;1;2;3;3;4;6;4;3;7;5;5;2;4;3;				IPR001128;IPR002401;	Cytochrome P450;Cytochrome P450, E-class, group I;	extracellular	Hs13435386	112	Q	[Q] Secondary metabolites biosynthesis, transport and catabolism;
T5AJB7	Isoflavone reductase family protein OS=Ophiocordyceps sinensis (strain Co18 / CGMCC 3.14243) OX=911162 GN=OCS_02428 PE=4 SV=1	0.994	1.125	1.086	0.878	1.228	1.447	1.306	1.342	1.11	0.782	1.118	1.014	0.767048	0.00483871	1.32281	0.0115584	1.01466	0.882519							GO:0016628;GO:0016627;GO:0010283;GO:0003824;GO:0003674;GO:0016491;	oxidoreductase activity, acting on the CH-CH group of donors, NAD or NADP as acceptor;oxidoreductase activity, acting on the CH-CH group of donors;pinoresinol reductase activity;catalytic activity;molecular_function;oxidoreductase activity;	5;4;6;2;1;3;				IPR016040;IPR008030;	NAD(P)-binding domain;NmrA-like domain;	mitochondria	116620580	66.6	R	[R] General function prediction only;	COG0702	Uncharacterized conserved protein YbjT, contains NAD(P)-binding and DUF2867 domains
T5AIP9	Mannitol-1-phosphate 5-dehydrogenase OS=Ophiocordyceps sinensis (strain Co18 / CGMCC 3.14243) OX=911162 GN=OCS_01800 PE=3 SV=1	0.826	0.781	0.76	0.826	1.125	1.15	1.286	0.922	0.826	0.89	0.836	1.024	0.712246	0.00572911	1.25364	0.0416882	0.8929	0.095684	GO:0019594;GO:0019751;GO:0044699;GO:0044710;GO:0044262;GO:0006059;GO:0071704;GO:0019400;GO:0009987;GO:0008150;GO:0008152;GO:0044723;GO:0044238;GO:0005975;GO:0044237;GO:0006066;GO:0044763;GO:1901615;GO:0044281;	mannitol metabolic process;polyol metabolic process;single-organism process;single-organism metabolic process;cellular carbohydrate metabolic process;hexitol metabolic process;organic substance metabolic process;alditol metabolic process;cellular process;biological_process;metabolic process;single-organism carbohydrate metabolic process;primary metabolic process;carbohydrate metabolic process;cel…	6;6;2;3;4;5;3;4;2;1;2;4;3;4;3;5;3;4;4;	GO:0005575;GO:0005576;	cellular_component;extracellular region;	1;2;	GO:0008926;GO:0003674;GO:0005488;GO:0016491;GO:0050662;GO:0003824;GO:0016614;GO:0016616;GO:0048037;	mannitol-1-phosphate 5-dehydrogenase activity;molecular_function;binding;oxidoreductase activity;coenzyme binding;catalytic activity;oxidoreductase activity, acting on CH-OH group of donors;oxidoreductase activity, acting on the CH-OH group of donors, NAD or NADP as acceptor;cofactor binding;	6;1;2;3;4;2;4;5;3;	K00009	map00051;	Fructose and mannose metabolism;	IPR000669;IPR013118;IPR013131;IPR023028;IPR008927;IPR013328;IPR016040;	Mannitol dehydrogenase;Mannitol dehydrogenase, C-terminal;Mannitol dehydrogenase, N-terminal;Mannitol-1-phosphate 5-dehydrogenase;6-phosphogluconate dehydrogenase C-terminal domain-like;6-phosphogluconate dehydrogenase, domain 2;NAD(P)-binding domain;	cytosol	258650327	394	G	[G] Carbohydrate transport and metabolism;	COG0246	Mannitol-1-phosphate/altronate dehydrogenases
T5A918	Protein disulfide-isomerase tigA OS=Ophiocordyceps sinensis (strain Co18 / CGMCC 3.14243) OX=911162 GN=OCS_05373 PE=3 SV=1	0.969	1.136	1.064	0.638	1.207	1.128	1.112	1.435	0.992	0.9	0.951	0.987	0.779806	0.0895424	1.27467	0.0145502	0.99399	0.960743	GO:0006457;GO:0045454;GO:0042592;GO:0070887;GO:0044699;GO:0051716;GO:0034976;GO:0050789;GO:0065007;GO:0019725;GO:0009987;GO:0050794;GO:0006950;GO:0008150;GO:0042221;GO:0034599;GO:0006979;GO:0065008;GO:0050896;GO:0033554;GO:0044763;	protein folding;cell redox homeostasis;homeostatic process;cellular response to chemical stimulus;single-organism process;cellular response to stimulus;response to endoplasmic reticulum stress;regulation of biological process;biological regulation;cellular homeostasis;cellular process;regulation of cellular process;response to stress;biological_process;response to chemical;cellular response to ox…	3;4;4;4;2;3;5;2;2;4;2;3;3;1;3;5;4;3;2;4;3;	GO:0005783;GO:0031974;GO:0043229;GO:0043227;GO:0043226;GO:0005737;GO:0005575;GO:0044432;GO:0005788;GO:0043231;GO:0043233;GO:0044464;GO:0005623;GO:0005622;GO:0044446;GO:0070013;GO:0044444;GO:0044424;GO:0044422;GO:0012505;	endoplasmic reticulum;membrane-enclosed lumen;intracellular organelle;membrane-bounded organelle;organelle;cytoplasm;cellular_component;endoplasmic reticulum part;endoplasmic reticulum lumen;intracellular membrane-bounded organelle;organelle lumen;cell part;cell;intracellular;intracellular organelle part;intracellular organelle lumen;cytoplasmic part;intracellular part;organelle part;endomembrane…	4;2;3;3;2;4;1;4;5;4;3;2;2;3;3;4;4;3;2;3;	GO:0003674;GO:0016864;GO:0016860;GO:0003756;GO:0016667;GO:0016491;GO:0003824;GO:0016853;GO:0015036;GO:0015035;	molecular_function;intramolecular oxidoreductase activity, transposing S-S bonds;intramolecular oxidoreductase activity;protein disulfide isomerase activity;oxidoreductase activity, acting on a sulfur group of donors;oxidoreductase activity;catalytic activity;isomerase activity;disulfide oxidoreductase activity;protein disulfide oxidoreductase activity;	1;5;4;6;4;3;2;3;5;6;	K09584	map04141;	Protein processing in endoplasmic reticulum;	IPR011679;IPR017937;IPR005788;IPR013766;IPR012336;	Endoplasmic reticulum resident protein 29, C-terminal;Thioredoxin, conserved site;Disulphide isomerase;Thioredoxin domain;Thioredoxin-like fold;	extracellular	At2g47470	242	O	[O] Posttranslational modification, protein turnover, chaperones;
cluster3
Protein	Description	ST_1	ST_2	ST_3	ST_4	PR_1	PR_2	PR_3	PR_4	MF_1	MF_2	MF_3	MF_4	ST-vs-PR	ST-vs-PR-p	PR-vs-MF	PR-vs-MF-p	ST-vs-MF	ST-vs-MF-p	BP_GO_ID	BP_GO_Desc	BP_GO_Level	CC_GO_ID	CC_GO_Desc	CC_GO_Level	MF_GO_ID	MF_GO_Desc	MF_GO_Level	KEGG_KO	KEGG_Pathway_ID	KEGG_Pathway_Desc	Domain_ID	Domain_Desc	SubcellurLocation	COG_Gene	BlastScore	COG_Code	COG_Desc
T5AFX3	Nor-1 OS=Ophiocordyceps sinensis (strain Co18 / CGMCC 3.14243) OX=911162 GN=OCS_02969 PE=4 SV=1	1.583	1.326	1.239	1.799	1.002	0.954	0.971	0.741	1.151	1.206	1.232	1.065	1.62132	0.00666033	0.78814	0.0125164	1.27783	0.0503652	GO:0043386;GO:0044249;GO:0043385;GO:0046222;GO:1901362;GO:0044699;GO:1901576;GO:0044710;GO:0044711;GO:0044550;GO:0071704;GO:1901360;GO:0018130;GO:0009987;GO:0019748;GO:0009058;GO:0008150;GO:0009404;GO:0008152;GO:1901376;GO:0046483;GO:0045122;GO:0009403;GO:0044237;GO:0044763;GO:1901378;	mycotoxin biosynthetic process;cellular biosynthetic process;mycotoxin metabolic process;aflatoxin metabolic process;organic cyclic compound biosynthetic process;single-organism process;organic substance biosynthetic process;single-organism metabolic process;single-organism biosynthetic process;secondary metabolite biosynthetic process;organic substance metabolic process;organic cyclic compound m…	6;4;5;6;5;2;4;3;4;5;3;4;5;2;4;3;1;4;2;5;4;7;5;3;3;6;				GO:0003674;GO:0016491;GO:0003824;GO:0016614;GO:0016616;	molecular_function;oxidoreductase activity;catalytic activity;oxidoreductase activity, acting on CH-OH group of donors;oxidoreductase activity, acting on the CH-OH group of donors, NAD or NADP as acceptor;	1;3;2;4;5;				IPR002347;IPR016040;	Short-chain dehydrogenase/reductase SDR;NAD(P)-binding domain;	mitochondria	89901214	74.7	R	[R] General function prediction only;	COG0300	Short-chain dehydrogenase
T5AL96	Catalase OS=Ophiocordyceps sinensis (strain Co18 / CGMCC 3.14243) OX=911162 GN=OCS_00915 PE=3 SV=1	1.554	1.089	1.311	1.29	0.669	0.728	0.637	0.763	1.512	1.175	1.014	0.902	1.87487	0.000841725	0.60765	0.0159174	1.13926	0.364636	GO:0044237;GO:0000302;GO:0044248;GO:0042744;GO:0098754;GO:0044699;GO:0044710;GO:0009636;GO:0098869;GO:0044712;GO:0009987;GO:0072593;GO:0006950;GO:0008150;GO:0008152;GO:0042221;GO:0010035;GO:0009056;GO:0006979;GO:1901700;GO:0042743;GO:0042542;GO:1990748;GO:0044763;GO:0050896;	cellular metabolic process;response to reactive oxygen species;cellular catabolic process;hydrogen peroxide catabolic process;detoxification;single-organism process;single-organism metabolic process;response to toxic substance;cellular oxidant detoxification;single-organism catabolic process;cellular process;reactive oxygen species metabolic process;response to stress;biological_process;metabolic…	3;5;4;4;2;2;3;4;4;4;2;4;3;1;2;3;4;3;4;4;5;5;3;3;2;	GO:0005737;GO:0005829;GO:0044464;GO:0005623;GO:0005622;GO:0005575;GO:0044444;GO:0044424;	cytoplasm;cytosol;cell part;cell;intracellular;cellular_component;cytoplasmic part;intracellular part;	4;5;2;2;3;1;4;3;	GO:0003674;GO:0005488;GO:1901363;GO:0016491;GO:0043169;GO:0043167;GO:0016684;GO:0004601;GO:0020037;GO:0016209;GO:0003824;GO:0046872;GO:0046906;GO:0097159;GO:0004096;	molecular_function;binding;heterocyclic compound binding;oxidoreductase activity;cation binding;ion binding;oxidoreductase activity, acting on peroxide as acceptor;peroxidase activity;heme binding;antioxidant activity;catalytic activity;metal ion binding;tetrapyrrole binding;organic cyclic compound binding;catalase activity;	1;2;3;3;4;3;4;3;5;2;2;5;4;3;4;	K03781	map00380;map00630;map01110;map01130;map01200;map04011;map04068;map04146;map04211;map04212;map04213;map05014;	Tryptophan metabolism;Glyoxylate and dicarboxylate metabolism;Biosynthesis of secondary metabolites;Biosynthesis of antibiotics;Carbon metabolism;MAPK signaling pathway - yeast;FoxO signaling pathway;Peroxisome;Longevity regulating pathway;Longevity regulating pathway - worm;Longevity regulating pathway - multiple species;Amyotrophic lateral sclerosis (ALS);	IPR002226;IPR024712;IPR029062;IPR024708;IPR018028;IPR010582;IPR020835;IPR011614;	Catalase haem-binding site;Catalase, mono-functional, haem-containing, clade 2;Class I glutamine amidotransferase-like;Catalase active site;Catalase, mono-functional, haem-containing;Catalase immune-responsive domain;Catalase-like domain;Catalase core domain;	extracellular	291302759	610	P	[P] Inorganic ion transport and metabolism;	COG0753	Catalase
T5A5N4	Catalase OS=Ophiocordyceps sinensis (strain Co18 / CGMCC 3.14243) OX=911162 GN=OCS_06587 PE=4 SV=1	1.152	1.263	1.259	nan	0.731	0.681	0.816	nan	1.408	1.165	1.034	nan	1.64902	0.000847241	0.61769	0.0168494	1.01857	0.856022	GO:0044237;GO:0044248;GO:0042744;GO:0044699;GO:0044710;GO:0044712;GO:0009987;GO:0072593;GO:0042743;GO:0044763;GO:0008152;GO:0009056;GO:0006979;GO:0050896;GO:0006950;GO:0008150;	cellular metabolic process;cellular catabolic process;hydrogen peroxide catabolic process;single-organism process;single-organism metabolic process;single-organism catabolic process;cellular process;reactive oxygen species metabolic process;hydrogen peroxide metabolic process;single-organism cellular process;metabolic process;catabolic process;response to oxidative stress;response to stimulus;res…	3;4;4;2;3;4;2;4;5;3;2;3;4;2;3;1;	GO:0042579;GO:0043229;GO:0043227;GO:0043226;GO:0005737;GO:0005777;GO:0043231;GO:0044464;GO:0005623;GO:0005622;GO:0005575;GO:0044444;GO:0044424;	microbody;intracellular organelle;membrane-bounded organelle;organelle;cytoplasm;peroxisome;intracellular membrane-bounded organelle;cell part;cell;intracellular;cellular_component;cytoplasmic part;intracellular part;	5;3;3;2;4;6;4;2;2;3;1;4;3;	GO:0003674;GO:0005488;GO:0043167;GO:0016491;GO:0043169;GO:1901363;GO:0016684;GO:0020037;GO:0016209;GO:0003824;GO:0046872;GO:0046906;GO:0097159;GO:0004096;GO:0004601;	molecular_function;binding;ion binding;oxidoreductase activity;cation binding;heterocyclic compound binding;oxidoreductase activity, acting on peroxide as acceptor;heme binding;antioxidant activity;catalytic activity;metal ion binding;tetrapyrrole binding;organic cyclic compound binding;catalase activity;peroxidase activity;	1;2;3;3;4;3;4;5;2;2;5;4;3;4;3;	K03781	map00380;map00630;map01110;map01130;map01200;map04011;map04068;map04146;map04211;map04212;map04213;map05014;	Tryptophan metabolism;Glyoxylate and dicarboxylate metabolism;Biosynthesis of secondary metabolites;Biosynthesis of antibiotics;Carbon metabolism;MAPK signaling pathway - yeast;FoxO signaling pathway;Peroxisome;Longevity regulating pathway;Longevity regulating pathway - worm;Longevity regulating pathway - multiple species;Amyotrophic lateral sclerosis (ALS);	IPR024711;IPR024708;IPR018028;IPR010582;IPR020835;IPR011614;	Catalase, mono-functional, haem-containing, clades 1 and 3;Catalase active site;Catalase, mono-functional, haem-containing;Catalase immune-responsive domain;Catalase-like domain;Catalase core domain;	mitochondria	CE22476	382	P	[P] Inorganic ion transport and metabolism;
T5AP38	Glucose-methanol-choline oxidoreductase OS=Ophiocordyceps sinensis (strain Co18 / CGMCC 3.14243) OX=911162 GN=OCS_00778 PE=4 SV=1	1.314	1.022	1.311	1.129	0.869	0.802	0.746	0.733	1.025	1.07	1.088	1.088	1.51619	0.00202251	0.73753	0.000183819	1.11824	0.135969							GO:0043168;GO:0050662;GO:0050660;GO:0016614;GO:0097159;GO:0000166;GO:0036094;GO:0003824;GO:0003674;GO:0005488;GO:0048037;GO:0043167;GO:1901363;GO:1901265;GO:0016491;	anion binding;coenzyme binding;flavin adenine dinucleotide binding;oxidoreductase activity, acting on CH-OH group of donors;organic cyclic compound binding;nucleotide binding;small molecule binding;catalytic activity;molecular_function;binding;cofactor binding;ion binding;heterocyclic compound binding;nucleoside phosphate binding;oxidoreductase activity;	4;4;5;4;3;4;3;2;1;2;3;3;3;4;3;				IPR000172;IPR013083;IPR023753;IPR007867;IPR007527;IPR001841;	Glucose-methanol-choline oxidoreductase, N-terminal;Zinc finger, RING/FYVE/PHD-type;FAD/NAD(P)-binding domain;Glucose-methanol-choline oxidoreductase, C-terminal;Zinc finger, SWIM-type;Zinc finger, RING-type;	mitochondria	7293011	229	R	[R] General function prediction only;
T5A9I4	Alcohol dehydrogenase superfamily, zinc-type OS=Ophiocordyceps sinensis (strain Co18 / CGMCC 3.14243) OX=911162 GN=OCS_05039 PE=3 SV=1	0.94	1.516	1.385	1.446	0.8	0.578	0.582	0.785	1.275	1.028	1.048	1.331	1.92604	0.00447588	0.58629	0.00271487	1.12922	0.356226				GO:0005737;GO:0044464;GO:0005623;GO:0005622;GO:0005575;GO:0044424;	cytoplasm;cell part;cell;intracellular;cellular_component;intracellular part;	4;2;2;3;1;3;	GO:0043169;GO:0046872;GO:0016614;GO:0016616;GO:0046914;GO:0003824;GO:0004022;GO:0016491;GO:0003674;GO:0005488;GO:0043167;GO:0008270;	cation binding;metal ion binding;oxidoreductase activity, acting on CH-OH group of donors;oxidoreductase activity, acting on the CH-OH group of donors, NAD or NADP as acceptor;transition metal ion binding;catalytic activity;alcohol dehydrogenase (NAD) activity;oxidoreductase activity;molecular_function;binding;ion binding;zinc ion binding;	4;5;4;5;6;2;6;3;1;2;3;7;	K13953	map00010;map00071;map00350;map00625;map00626;map00830;map00980;map00982;map01100;map01110;map01120;map01130;map01220;	Glycolysis / Gluconeogenesis;Fatty acid degradation;Tyrosine metabolism;Chloroalkane and chloroalkene degradation;Naphthalene degradation;Retinol metabolism;Metabolism of xenobiotics by cytochrome P450;Drug metabolism - cytochrome P450;Metabolic pathways;Biosynthesis of secondary metabolites;Microbial metabolism in diverse environments;Biosynthesis of antibiotics;Degradation of aromatic compounds;	IPR020843;IPR013149;IPR002328;IPR011032;IPR013154;IPR016040;	Polyketide synthase, enoylreductase domain;Alcohol dehydrogenase, C-terminal;Alcohol dehydrogenase, zinc-type, conserved site;GroES-like;Alcohol dehydrogenase, N-terminal;NAD(P)-binding domain;	cytosol	YMR083w	389	Q	[Q] Secondary metabolites biosynthesis, transport and catabolism;
T4ZY06	Extradiol ring-cleavage dioxygenase, class III enzyme, subunit B OS=Ophiocordyceps sinensis (strain Co18 / CGMCC 3.14243) OX=911162 GN=OCS_06261 PE=4 SV=1	2.072	nan	nan	1.496	0.737	nan	nan	0.673	1.292	nan	nan	1.12	2.53049	0.0651531	0.58458	0.0319469	1.47927	0.194392	GO:0044237;GO:0044699;GO:0044710;GO:0009987;GO:0006725;GO:0008150;GO:0008152;GO:0055114;	cellular metabolic process;single-organism process;single-organism metabolic process;cellular process;cellular aromatic compound metabolic process;biological_process;metabolic process;oxidation-reduction process;	3;2;3;2;4;1;2;4;	GO:0005737;GO:0044464;GO:0005623;GO:0005622;GO:0005575;GO:0044424;	cytoplasm;cell part;cell;intracellular;cellular_component;intracellular part;	4;2;2;3;1;3;	GO:0008270;GO:0046566;GO:0003674;GO:0016701;GO:0016491;GO:0043169;GO:0046914;GO:0016702;GO:0043167;GO:0005506;GO:0046872;GO:0050297;GO:0008198;GO:0003824;GO:0051213;GO:0005488;	zinc ion binding;DOPA dioxygenase activity;molecular_function;oxidoreductase activity, acting on single donors with incorporation of molecular oxygen;oxidoreductase activity;cation binding;transition metal ion binding;oxidoreductase activity, acting on single donors with incorporation of molecular oxygen, incorporation of two atoms of oxygen;ion binding;iron ion binding;metal ion binding;stizolob…	7;5;1;4;3;4;6;5;3;7;5;6;8;2;4;2;				IPR014436;IPR004183;	Extradiol aromatic ring-opening dioxygenase, DODA-type;Extradiol ring-cleavage dioxygenase, class III enzyme, subunit B;	cytoskeleton	193214730	176	Q	[Q] Secondary metabolites biosynthesis, transport and catabolism;	COG3384	Aromatic ring-opening dioxygenase, catalytic subunit, LigB family
T5A6F1	Superoxide dismutase OS=Ophiocordyceps sinensis (strain Co18 / CGMCC 3.14243) OX=911162 GN=OCS_06956 PE=4 SV=1	0.983	1.182	1.051	1.055	0.79	0.802	0.904	0.861	1.45	1.191	0.989	1.342	1.27226	0.00355697	0.67518	0.0079474	0.85901	0.156504				GO:0005737;GO:0044464;GO:0005623;GO:0005622;GO:0005575;GO:0044424;	cytoplasm;cell part;cell;intracellular;cellular_component;intracellular part;	4;2;2;3;1;3;	GO:0016721;GO:0043169;GO:0016209;GO:0043167;GO:0003824;GO:0003674;GO:0005488;GO:0004784;GO:0046872;GO:0016491;	oxidoreductase activity, acting on superoxide radicals as acceptor;cation binding;antioxidant activity;ion binding;catalytic activity;molecular_function;binding;superoxide dismutase activity;metal ion binding;oxidoreductase activity;	4;4;2;3;2;1;2;3;5;3;	K04565	map04146;map04213;map05014;map05016;map05020;	Peroxisome;Longevity regulating pathway - multiple species;Amyotrophic lateral sclerosis (ALS);Huntington's disease;Prion diseases;	IPR001424;	Superoxide dismutase, copper/zinc binding domain;	nucleus	YJR104c	102	P	[P] Inorganic ion transport and metabolism;
T5AA62	Alcohol dehydrogenase superfamily, zinc-type OS=Ophiocordyceps sinensis (strain Co18 / CGMCC 3.14243) OX=911162 GN=OCS_04977 PE=4 SV=1	1.071	0.803	1.553	1.145	0.77	0.875	0.691	0.708	1.166	1.244	0.858	1.124	1.50198	0.054922	0.69308	0.0113304	1.04098	0.807088	GO:0070887;GO:0051716;GO:0009987;GO:0006950;GO:0008150;GO:0042221;GO:0034599;GO:0006979;GO:0050896;GO:0033554;	cellular response to chemical stimulus;cellular response to stimulus;cellular process;response to stress;biological_process;response to chemical;cellular response to oxidative stress;response to oxidative stress;response to stimulus;cellular response to stress;	4;3;2;3;1;3;5;4;2;4;				GO:0003676;GO:0003674;GO:0005488;GO:1901363;GO:0016491;GO:0043169;GO:0016628;GO:0046914;GO:0016627;GO:0043167;GO:0017091;GO:0032440;GO:0046872;GO:0003723;GO:0003824;GO:0003960;GO:0097159;GO:0016655;GO:0016651;GO:0008270;	nucleic acid binding;molecular_function;binding;heterocyclic compound binding;oxidoreductase activity;cation binding;oxidoreductase activity, acting on the CH-CH group of donors, NAD or NADP as acceptor;transition metal ion binding;oxidoreductase activity, acting on the CH-CH group of donors;ion binding;AU-rich element binding;2-alkenal reductase [NAD(P)] activity;metal ion binding;RNA binding;ca…	4;1;2;3;3;4;5;6;4;3;6;6;5;5;2;6;3;5;4;7;	K00344			IPR013149;IPR011032;IPR016040;IPR002364;IPR020843;	Alcohol dehydrogenase, C-terminal;GroES-like;NAD(P)-binding domain;Quinone oxidoreductase/zeta-crystallin, conserved site;Polyketide synthase, enoylreductase domain;	cytosol	YBR046c	238	CR	[C] Energy production and conversion;[R] General function prediction only;
T5A413	L-threonine 3-dehydrogenase OS=Ophiocordyceps sinensis (strain Co18 / CGMCC 3.14243) OX=911162 GN=OCS_06954 PE=4 SV=1	1.838	1.368	1.439	1.138	0.944	0.711	0.711	0.736	1.057	1.027	0.951	1.14	1.86428	0.00514967	0.74299	0.00792838	1.38515	0.0372588	GO:0044699;GO:0044710;GO:0071704;GO:0008150;GO:0008152;GO:0005975;GO:0055114;GO:0051704;GO:0044238;GO:0009405;	single-organism process;single-organism metabolic process;organic substance metabolic process;biological_process;metabolic process;carbohydrate metabolic process;oxidation-reduction process;multi-organism process;primary metabolic process;pathogenesis;	2;3;3;1;2;4;4;2;3;3;	GO:0042995;GO:0044464;GO:0005623;GO:0005575;	cell projection;cell part;cell;cellular_component;	3;2;2;1;	GO:0003674;GO:0008270;GO:0016491;GO:0043169;GO:0046914;GO:0052677;GO:0043167;GO:0033709;GO:0046872;GO:0003824;GO:0016614;GO:0016616;GO:0005488;	molecular_function;zinc ion binding;oxidoreductase activity;cation binding;transition metal ion binding;D-arabinitol dehydrogenase, D-xylulose forming (NADP+) activity;ion binding;D-arabinitol dehydrogenase, D-ribulose forming (NADP+) activity;metal ion binding;catalytic activity;oxidoreductase activity, acting on CH-OH group of donors;oxidoreductase activity, acting on the CH-OH group of donors,…	1;7;3;4;6;6;3;6;5;2;4;5;2;	K17818	map00040;map01100;	Pentose and glucuronate interconversions;Metabolic pathways;	IPR013149;IPR016040;	Alcohol dehydrogenase, C-terminal;NAD(P)-binding domain;	cytosol	269839298	88.6	ER	[E] Amino acid transport and metabolism; [R] General function prediction only;	COG1063	Threonine dehydrogenase or related Zn-dependent dehydrogenase
T5AF35	Transaldolase OS=Ophiocordyceps sinensis (strain Co18 / CGMCC 3.14243) OX=911162 GN=OCS_03843 PE=4 SV=1	2.069	0.968	0.702	0.729	0.566	0.68	0.411	0.727	1.28	1.19	1.354	1.336	1.87417	0.165986	0.46202	0.000124115	0.86589	0.61365	GO:0042221;GO:0006739;GO:0006732;GO:0006733;GO:0009117;GO:1901564;GO:0034641;GO:0006098;GO:0046496;GO:0070887;GO:0006081;GO:0072524;GO:0044699;GO:0006139;GO:0044710;GO:0051186;GO:0048869;GO:0019682;GO:0071704;GO:1901360;GO:0019637;GO:0044281;GO:0032502;GO:0019693;GO:0009987;GO:0006725;GO:0051716;GO:0044767;GO:0006950;GO:0008150;GO:0008152;GO:0007568;GO:0034599;GO:0006979;GO:0055086;GO:0046483;GO:…	response to chemical;NADP metabolic process;coenzyme metabolic process;oxidoreduction coenzyme metabolic process;nucleotide metabolic process;organonitrogen compound metabolic process;cellular nitrogen compound metabolic process;pentose-phosphate shunt;nicotinamide nucleotide metabolic process;cellular response to chemical stimulus;cellular aldehyde metabolic process;pyridine-containing compound …	3;8;5;6;6;4;4;6;7;4;4;5;2;4;3;4;4;5;3;4;4;4;2;5;2;4;3;3;3;1;2;4;5;4;4;4;3;4;5;6;5;4;5;3;4;4;3;3;5;2;6;	GO:0005737;GO:0044464;GO:0005623;GO:0005622;GO:0005575;GO:0044424;	cytoplasm;cell part;cell;intracellular;cellular_component;intracellular part;	4;2;2;3;1;3;	GO:0003674;GO:0016740;GO:0016744;GO:0003824;GO:0004801;	molecular_function;transferase activity;transferase activity, transferring aldehyde or ketonic groups;catalytic activity;sedoheptulose-7-phosphate:D-glyceraldehyde-3-phosphate glyceronetransferase activity;	1;3;4;2;5;				IPR001585;IPR013785;	Transaldolase/Fructose-6-phosphate aldolase;Aldolase-type TIM barrel;	mitochondria	YGR043c	89.7	G	[G] Carbohydrate transport and metabolism;
T4ZWU2	Mitochondrial peroxiredoxin PRX1 OS=Ophiocordyceps sinensis (strain Co18 / CGMCC 3.14243) OX=911162 GN=OCS_06712 PE=4 SV=1	1.112	1.261	1.342	1.212	0.98	0.844	0.761	0.777	1.157	0.968	0.678	1.081	1.4655	0.00132031	0.8656	0.304804	1.26854	0.0648963	GO:0034599;GO:0042592;GO:0070887;GO:0098754;GO:0044699;GO:0051716;GO:0009636;GO:0050789;GO:0098869;GO:0065007;GO:0046686;GO:0019725;GO:0009987;GO:0050794;GO:1990748;GO:0008150;GO:0010038;GO:0042221;GO:0045454;GO:0010035;GO:0006979;GO:0065008;GO:0050896;GO:0006950;GO:0033554;GO:0044763;	cellular response to oxidative stress;homeostatic process;cellular response to chemical stimulus;detoxification;single-organism process;cellular response to stimulus;response to toxic substance;regulation of biological process;cellular oxidant detoxification;biological regulation;response to cadmium ion;cellular homeostasis;cellular process;regulation of cellular process;cellular detoxification;b…	5;4;4;2;2;3;4;2;4;2;6;4;2;3;3;1;5;3;4;4;4;3;2;3;4;3;	GO:0043229;GO:0043227;GO:0043226;GO:0005737;GO:0005739;GO:0043231;GO:0044464;GO:0005623;GO:0005622;GO:0005575;GO:0044444;GO:0044424;	intracellular organelle;membrane-bounded organelle;organelle;cytoplasm;mitochondrion;intracellular membrane-bounded organelle;cell part;cell;intracellular;cellular_component;cytoplasmic part;intracellular part;	3;3;2;4;5;4;2;2;3;1;4;3;	GO:0003674;GO:0008379;GO:0051920;GO:0016491;GO:0016684;GO:0016209;GO:0003824;GO:0004601;	molecular_function;thioredoxin peroxidase activity;peroxiredoxin activity;oxidoreductase activity;oxidoreductase activity, acting on peroxide as acceptor;antioxidant activity;catalytic activity;peroxidase activity;	1;4;3;3;4;2;2;3;	K24137			IPR012336;IPR000866;IPR019479;IPR013766;IPR024706;	Thioredoxin-like fold;Alkyl hydroperoxide reductase subunit C/ Thiol specific antioxidant;Peroxiredoxin, C-terminal;Thioredoxin domain;Peroxiredoxin, AhpC-type;	cytosol	YBL064c	250	O	[O] Posttranslational modification, protein turnover, chaperones;
cluster 4
Protein	Description	PR_1	PR_2	PR_3	PR_4	ST_1	ST_2	ST_3	ST_4	MF_1	MF_2	MF_3	MF_4	ST-vs-PR	ST-vs-PR-p	PR-vs-MF	PR-vs-MF-p	ST-vs-MF	ST-vs-MF-p	BP_GO_ID	BP_GO_Desc	BP_GO_Level	CC_GO_ID	CC_GO_Desc	CC_GO_Level	MF_GO_ID	MF_GO_Desc	MF_GO_Level	KEGG_KO	KEGG_Pathway_ID	KEGG_Pathway_Desc	Domain_ID	Domain_Desc	SubcellurLocation	COG_Gene	BlastScore	COG_Code	COG_Desc
T5A9T9	AhpC/TSA family protein OS=Ophiocordyceps sinensis (strain Co18 / CGMCC 3.14243) OX=911162 GN=OCS_05766 PE=4 SV=1	1.163	nan	0.816	1.101	1.649	nan	2.886	1.961	0.703	nan	0.333	0.688	2.10908	0.0421265	1.78654	0.0487466	3.76798	0.0151939	GO:0090087;GO:0033157;GO:0051169;GO:0008104;GO:0019220;GO:0080090;GO:0019222;GO:0060249;GO:0051049;GO:0032386;GO:0048583;GO:0007165;GO:0044707;GO:0023014;GO:0044712;GO:0051716;GO:0001895;GO:0070727;GO:0009966;GO:0002262;GO:0000165;GO:0098869;GO:0001909;GO:0001906;GO:0033036;GO:0043122;GO:0042325;GO:0006793;GO:0060255;GO:0006606;GO:0006605;GO:0045184;GO:1990748;GO:0010035;GO:0042990;GO:0042991;GO:…	regulation of peptide transport;regulation of intracellular protein transport;nuclear transport;protein localization;regulation of phosphate metabolic process;regulation of primary metabolic process;regulation of metabolic process;anatomical structure homeostasis;regulation of transport;regulation of intracellular transport;regulation of response to stimulus;signal transduction;single-multicellul…	5;6;6;4;6;4;3;5;4;5;3;4;3;4;4;3;6;4;4;3;5;4;3;2;3;6;7;4;4;5;6;4;3;4;7;6;5;3;5;4;4;2;4;4;6;4;5;6;5;4;5;5;2;5;5;5;4;6;7;6;2;3;5;6;4;3;3;4;3;5;1;2;3;6;3;6;5;2;3;5;5;7;8;6;5;6;2;7;3;4;2;4;5;5;5;5;5;4;6;4;6;5;5;5;4;6;6;5;5;3;4;6;3;5;6;6;4;7;4;4;4;4;2;3;4;4;2;5;3;5;4;7;2;4;5;6;7;6;5;5;4;6;3;4;4;5;3;2;3;3;4;3;7;6;6;3;5;3;5;5;4;	GO:0031982;GO:0005615;GO:0043230;GO:0043231;GO:0044421;GO:0044464;GO:0043229;GO:0043227;GO:0043226;GO:0044424;GO:0043209;GO:0044444;GO:0005737;GO:0005634;GO:0005739;GO:0005623;GO:0005622;GO:0070062;GO:1903561;GO:0005575;GO:0005576;	vesicle;extracellular space;extracellular organelle;intracellular membrane-bounded organelle;extracellular region part;cell part;intracellular organelle;membrane-bounded organelle;organelle;intracellular part;myelin sheath;cytoplasmic part;cytoplasm;nucleus;mitochondrion;cell;intracellular;extracellular exosome;extracellular vesicle;cellular_component;extracellular region;	4;3;3;4;2;2;3;3;2;3;3;4;4;5;5;2;3;4;3;1;2;	GO:0016209;GO:0016684;GO:0008379;GO:0003676;GO:1901363;GO:0003824;GO:0097159;GO:0004601;GO:0044822;GO:0003723;GO:0003674;GO:0005488;GO:0051920;GO:0016491;	antioxidant activity;oxidoreductase activity, acting on peroxide as acceptor;thioredoxin peroxidase activity;nucleic acid binding;heterocyclic compound binding;catalytic activity;organic cyclic compound binding;peroxidase activity;poly(A) RNA binding;RNA binding;molecular_function;binding;peroxiredoxin activity;oxidoreductase activity;	2;4;4;4;3;2;3;3;6;5;1;2;3;3;	K03386	map04214;	Apoptosis - fly;	IPR000866;IPR019479;IPR013766;IPR012336;	Alkyl hydroperoxide reductase subunit C/ Thiol specific antioxidant;Peroxiredoxin, C-terminal;Thioredoxin domain;Thioredoxin-like fold;	cytosol	Hs4505591	266	O	[O] Posttranslational modification, protein turnover, chaperones;
T5AHW7	Flavin-containing monooxygenase OS=Ophiocordyceps sinensis (strain Co18 / CGMCC 3.14243) OX=911162 GN=OCS_02938 PE=4 SV=1	1.018	0.945	0.985	0.984	1.327	1.719	1.531	1.412	0.83	0.799	0.739	0.885	1.52314	0.000996049	1.20873	0.00244684	1.84107	0.00027407	GO:0044249;GO:0044710;GO:0065007;GO:0044699;GO:0065008;GO:0042445;GO:0009987;GO:0042446;GO:0010817;GO:0009058;GO:0008152;GO:0055114;GO:0044237;GO:0009850;GO:0009851;GO:0008150;	cellular biosynthetic process;single-organism metabolic process;biological regulation;single-organism process;regulation of biological quality;hormone metabolic process;cellular process;hormone biosynthetic process;regulation of hormone levels;biosynthetic process;metabolic process;oxidation-reduction process;cellular metabolic process;auxin metabolic process;auxin biosynthetic process;biological…	4;3;2;2;3;3;2;4;4;3;2;4;3;4;5;1;				GO:0004497;GO:0004499;GO:0003674;GO:0005488;GO:0043167;GO:1901363;GO:1901265;GO:0016491;GO:0043168;GO:0050662;GO:0050661;GO:0050660;GO:0016709;GO:0016705;GO:0000166;GO:0036094;GO:0003824;GO:0048037;GO:0097159;	monooxygenase activity;N,N-dimethylaniline monooxygenase activity;molecular_function;binding;ion binding;heterocyclic compound binding;nucleoside phosphate binding;oxidoreductase activity;anion binding;coenzyme binding;NADP binding;flavin adenine dinucleotide binding;oxidoreductase activity, acting on paired donors, with incorporation or reduction of molecular oxygen, NAD(P)H as one donor, and in…	4;6;1;2;3;3;4;3;4;4;5;5;5;4;4;3;2;3;3;				IPR023753;	FAD/NAD(P)-binding domain;	cytosol	111022661	535	P	[P] Inorganic ion transport and metabolism;	COG2072	Predicted flavoprotein CzcO associated with the cation diffusion facilitator CzcD
T5A9V1	Glutathione peroxidase OS=Ophiocordyceps sinensis (strain Co18 / CGMCC 3.14243) OX=911162 GN=OCS_02048 PE=3 SV=1	1.071	1.189	1.015	1.217	1.345	1.013	1.295	1.024	0.995	0.875	0.726	0.766	1.04119	0.659723	1.33611	0.0105115	1.39114	0.0214201	GO:0006950;GO:0070887;GO:0098754;GO:0051716;GO:0009636;GO:0098869;GO:0009987;GO:1990748;GO:0008150;GO:0042221;GO:0034599;GO:0006979;GO:0050896;GO:0033554;	response to stress;cellular response to chemical stimulus;detoxification;cellular response to stimulus;response to toxic substance;cellular oxidant detoxification;cellular process;cellular detoxification;biological_process;response to chemical;cellular response to oxidative stress;response to oxidative stress;response to stimulus;cellular response to stress;	3;4;2;3;4;4;2;3;1;3;5;4;2;4;	GO:0044464;GO:0031975;GO:0043229;GO:0043227;GO:0043226;GO:0005737;GO:0044446;GO:0031090;GO:0098805;GO:0016020;GO:0005740;GO:0005739;GO:0019867;GO:0031968;GO:0098588;GO:0031967;GO:0031966;GO:0031315;GO:0044425;GO:0019898;GO:0044455;GO:0043231;GO:0019866;GO:0031314;GO:0005623;GO:0005622;GO:0005575;GO:0005743;GO:0044444;GO:0005741;GO:0044429;GO:0044424;GO:0031312;GO:0044422;	cell part;envelope;intracellular organelle;membrane-bounded organelle;organelle;cytoplasm;intracellular organelle part;organelle membrane;whole membrane;membrane;mitochondrial envelope;mitochondrion;outer membrane;organelle outer membrane;bounding membrane of organelle;organelle envelope;mitochondrial membrane;extrinsic component of mitochondrial outer membrane;membrane part;extrinsic component o…	2;3;3;3;2;4;3;3;3;2;5;5;3;4;4;4;4;4;2;3;3;4;4;4;2;3;1;5;4;5;4;3;4;2;	GO:0047066;GO:0003674;GO:0016491;GO:0004602;GO:0016684;GO:0016209;GO:0003824;GO:0004601;	phospholipid-hydroperoxide glutathione peroxidase activity;molecular_function;oxidoreductase activity;glutathione peroxidase activity;oxidoreductase activity, acting on peroxide as acceptor;antioxidant activity;catalytic activity;peroxidase activity;	5;1;3;4;4;2;2;3;	K23856			IPR029759;IPR000889;IPR012336;IPR029760;	Glutathione peroxidase active site;Glutathione peroxidase;Thioredoxin-like fold;Glutathione peroxidase conserved site;	cytosol	SPBC32F12.03c	201	O	[O] Posttranslational modification, protein turnover, chaperones;
T5ACE9	WSC domain containing protein OS=Ophiocordyceps sinensis (strain Co18 / CGMCC 3.14243) OX=911162 GN=OCS_04190 PE=3 SV=1	0.762	0.815	0.818	1.049	1.889	1.56	1.527	1.428	0.822	0.791	1.111	0.806	1.85946	0.000789022	0.97564	0.836357	1.81416	0.00125092	GO:0050896;GO:0006950;GO:0006979;GO:0008150;	response to stimulus;response to stress;response to oxidative stress;biological_process;	2;3;4;1;	GO:0005575;GO:0005576;	cellular_component;extracellular region;	1;2;	GO:0020037;GO:0046906;GO:0097159;GO:0016209;GO:1901363;GO:0003824;GO:0003674;GO:0005488;GO:0016684;GO:0004601;GO:0016491;	heme binding;tetrapyrrole binding;organic cyclic compound binding;antioxidant activity;heterocyclic compound binding;catalytic activity;molecular_function;binding;oxidoreductase activity, acting on peroxide as acceptor;peroxidase activity;oxidoreductase activity;	5;4;3;2;3;2;1;2;4;3;3;				IPR002889;IPR010255;IPR002207;IPR002016;	Carbohydrate-binding WSC;Haem peroxidase;Plant ascorbate peroxidase;Haem peroxidase, plant/fungal/bacterial;	extracellular	At4g35970	83.6	R	[R] General function prediction only;
T5AHU7	NADPH--cytochrome P450 reductase OS=Ophiocordyceps sinensis (strain Co18 / CGMCC 3.14243) OX=911162 GN=cprA PE=3 SV=1	1.168	1.029	0.88	1.001	0.964	1.376	1.503	0.902	0.8	0.881	0.873	0.696	1.16356	0.338407	1.25477	0.0298051	1.46	0.0525742	GO:0044281;GO:0044283;GO:1901362;GO:1901360;GO:0044710;GO:0044711;GO:1902653;GO:1902652;GO:1901576;GO:0044699;GO:0006629;GO:0008150;GO:0008152;GO:0097384;GO:0006694;GO:0006696;GO:1901617;GO:1901615;GO:0016126;GO:0016125;GO:0046165;GO:0009987;GO:0016128;GO:0016129;GO:0044107;GO:0008204;GO:0044255;GO:0008202;GO:0044108;GO:0006066;GO:0071704;GO:0009058;GO:0044763;GO:0008610;GO:0044238;GO:0044237;GO:…	small molecule metabolic process;small molecule biosynthetic process;organic cyclic compound biosynthetic process;organic cyclic compound metabolic process;single-organism metabolic process;single-organism biosynthetic process;secondary alcohol biosynthetic process;secondary alcohol metabolic process;organic substance biosynthetic process;single-organism process;lipid metabolic process;biological…	4;5;5;4;3;4;7;6;4;2;4;1;2;5;6;6;5;4;7;6;6;2;6;7;4;5;4;5;5;5;3;3;3;5;3;3;4;	GO:0005783;GO:0005789;GO:0016021;GO:0016020;GO:0031968;GO:0098588;GO:0031967;GO:0031966;GO:0031975;GO:0043231;GO:0044429;GO:0044424;GO:0044425;GO:0044422;GO:0043229;GO:0043227;GO:0043226;GO:0044432;GO:0012505;GO:0044446;GO:0044444;GO:0042175;GO:0031224;GO:0005737;GO:0031090;GO:0005739;GO:0044464;GO:0019867;GO:0005623;GO:0005622;GO:0005740;GO:0005741;GO:0071944;GO:0098805;GO:0005886;GO:0005575;	endoplasmic reticulum;endoplasmic reticulum membrane;integral component of membrane;membrane;organelle outer membrane;bounding membrane of organelle;organelle envelope;mitochondrial membrane;envelope;intracellular membrane-bounded organelle;mitochondrial part;intracellular part;membrane part;organelle part;intracellular organelle;membrane-bounded organelle;organelle;endoplasmic reticulum part;end…	4;3;4;2;4;4;4;4;3;4;4;3;2;2;3;3;2;4;3;3;4;3;3;4;3;5;2;3;2;3;5;5;3;3;3;1;	GO:1901363;GO:0000166;GO:0046872;GO:0003958;GO:0097367;GO:0003674;GO:0005488;GO:1901265;GO:0046914;GO:0003824;GO:0097159;GO:0032553;GO:0016491;GO:0043169;GO:0043167;GO:0005506;GO:0009055;GO:0048037;GO:0016651;GO:0016653;GO:0010181;GO:0036094;	heterocyclic compound binding;nucleotide binding;metal ion binding;NADPH-hemoprotein reductase activity;carbohydrate derivative binding;molecular_function;binding;nucleoside phosphate binding;transition metal ion binding;catalytic activity;organic cyclic compound binding;ribonucleotide binding;oxidoreductase activity;cation binding;ion binding;iron ion binding;electron carrier activity;cofactor b…	3;4;5;6;3;1;2;4;6;2;3;4;3;4;3;7;2;3;4;5;4;3;	K00327			IPR017927;IPR029039;IPR008254;IPR001433;IPR017938;IPR001709;IPR001094;IPR023208;IPR003097;	Ferredoxin reductase-type FAD-binding domain;Flavoprotein-like domain;Flavodoxin/nitric oxide synthase;Oxidoreductase FAD/NAD(P)-binding;Riboflavin synthase-like beta-barrel;Flavoprotein pyridine nucleotide cytochrome reductase;Flavodoxin-like;NADPH-cytochrome P450 reductase;FAD-binding, type 1;	cytosol	SPBC365.17	560	C	[C] Energy production and conversion;
T5ABX3	NAD(P)-binding domain protein OS=Ophiocordyceps sinensis (strain Co18 / CGMCC 3.14243) OX=911162 GN=OCS_04375 PE=4 SV=1	0.969	1.057	0.922	0.699	2.243	1.077	1.469	1.474	0.561	0.601	0.509	0.868	1.7173	0.0430876	1.43639	0.0461119	2.46672	0.0110489	GO:0018964;GO:0006805;GO:0009410;GO:0044237;GO:0070887;GO:0042178;GO:0051716;GO:1900673;GO:0071704;GO:0009987;GO:1901575;GO:0008150;GO:0008152;GO:0042221;GO:0009056;GO:0044248;GO:0043451;GO:0050896;GO:0043449;GO:0042208;GO:0071466;	propylene metabolic process;xenobiotic metabolic process;response to xenobiotic stimulus;cellular metabolic process;cellular response to chemical stimulus;xenobiotic catabolic process;cellular response to stimulus;olefin metabolic process;organic substance metabolic process;cellular process;organic substance catabolic process;biological_process;metabolic process;response to chemical;catabolic pro…	5;4;4;3;4;5;3;4;3;2;4;1;2;3;3;4;5;2;4;6;5;				GO:0003674;GO:0050574;GO:0016491;GO:0003824;GO:0016614;GO:0016616;	molecular_function;2-(R)-hydroxypropyl-CoM dehydrogenase activity;oxidoreductase activity;catalytic activity;oxidoreductase activity, acting on CH-OH group of donors;oxidoreductase activity, acting on the CH-OH group of donors, NAD or NADP as acceptor;	1;6;3;2;4;5;				IPR002347;IPR016040;IPR020904;	Short-chain dehydrogenase/reductase SDR;NAD(P)-binding domain;Short-chain dehydrogenase/reductase, conserved site;	mitochondria	111026247	227	IQR	[I] Lipid transport and metabolism; [Q] Secondary metabolites biosynthesis, transport and catabolism; [R] General function prediction only;	COG1028	NAD(P)-dependent dehydrogenase, short-chain alcohol dehydrogenase family
T5AJL9	2-nitropropane dioxygenase OS=Ophiocordyceps sinensis (strain Co18 / CGMCC 3.14243) OX=911162 GN=OCS_01685 PE=4 SV=1	1.07	1.007	0.933	0.981	1.167	1.014	1.181	0.94	0.692	0.75	0.745	0.793	1.07792	0.27983	1.33926	0.000372027	1.44362	0.00184178							GO:0004497;GO:0016703;GO:0016701;GO:0003824;GO:0003674;GO:0018580;GO:0016491;	monooxygenase activity;oxidoreductase activity, acting on single donors with incorporation of molecular oxygen, incorporation of one atom of oxygen (internal monooxygenases or internal mixed function oxidases);oxidoreductase activity, acting on single donors with incorporation of molecular oxygen;catalytic activity;molecular_function;nitronate monooxygenase activity;oxidoreductase activity;	4;5;4;2;1;6;3;				IPR004136;IPR013785;	Nitronate monooxygenase;Aldolase-type TIM barrel;	cytosol	154251214	190	R	[R] General function prediction only;	COG2070	NAD(P)H-dependent flavin oxidoreductase YrpB, nitropropane dioxygenase family
T5AAS5	Peroxiredoxin OS=Ophiocordyceps sinensis (strain Co18 / CGMCC 3.14243) OX=911162 GN=OCS_01708 PE=3 SV=1	0.864	0.596	0.721	0.587	1.478	1.374	1.06	1.214	0.711	0.943	0.616	0.647	1.85189	0.0019248	0.94892	0.718151	1.75728	0.0033617				GO:0042579;GO:0043229;GO:0043227;GO:0043226;GO:0005737;GO:0005777;GO:0005622;GO:0043231;GO:0044464;GO:0005623;GO:0005575;GO:0044444;GO:0044424;	microbody;intracellular organelle;membrane-bounded organelle;organelle;cytoplasm;peroxisome;intracellular;intracellular membrane-bounded organelle;cell part;cell;cellular_component;cytoplasmic part;intracellular part;	5;3;3;2;4;6;3;4;2;2;1;4;3;	GO:0003674;GO:0005488;GO:0051920;GO:0016491;GO:0032403;GO:0016684;GO:0016209;GO:0003824;GO:0019863;GO:0019865;GO:0005515;GO:0044877;GO:0004601;	molecular_function;binding;peroxiredoxin activity;oxidoreductase activity;protein complex binding;oxidoreductase activity, acting on peroxide as acceptor;antioxidant activity;catalytic activity;IgE binding;immunoglobulin binding;protein binding;macromolecular complex binding;peroxidase activity;	1;2;3;3;4;4;2;2;6;5;3;3;3;	K14171	map04122;	Sulfur relay system;	IPR013766;IPR013740;IPR012336;	Thioredoxin domain;Redoxin;Thioredoxin-like fold;	cytosol	YLR109w	101	O	[O] Posttranslational modification, protein turnover, chaperones;
T4ZZN0	Scavenger mRNA decapping enzyme OS=Ophiocordyceps sinensis (strain Co18 / CGMCC 3.14243) OX=911162 GN=OCS_05693 PE=4 SV=1	1.196	nan	1.142	nan	1.265	nan	1.365	nan	0.947	nan	0.986	nan	1.1249	0.12394	1.20952	0.0260004	1.36058	0.0229035	GO:0080090;GO:0019222;GO:1901360;GO:1901361;GO:0051716;GO:0010604;GO:0048869;GO:0044093;GO:0048518;GO:0060255;GO:0031668;GO:0060700;GO:0046483;GO:0031669;GO:0009605;GO:0031667;GO:0033554;GO:0019439;GO:0090342;GO:0009893;GO:0006807;GO:0050789;GO:1901575;GO:0044265;GO:0044260;GO:0065007;GO:0043085;GO:0065009;GO:0007584;GO:0050793;GO:0050790;GO:0046700;GO:0006950;GO:0008150;GO:0008152;GO:0009266;GO:…	regulation of primary metabolic process;regulation of metabolic process;organic cyclic compound metabolic process;organic cyclic compound catabolic process;cellular response to stimulus;positive regulation of macromolecule metabolic process;cellular developmental process;positive regulation of molecular function;positive regulation of biological process;regulation of macromolecule metabolic proce…	4;3;4;5;3;4;4;4;2;4;4;6;4;5;3;5;4;5;4;3;3;2;4;5;4;2;5;3;4;3;4;5;3;1;2;4;5;3;9;6;5;2;5;5;4;4;4;5;2;4;9;2;5;4;3;2;4;4;4;4;9;4;5;5;5;4;8;6;7;4;4;4;5;5;4;3;6;7;5;5;3;3;4;4;3;3;5;3;6;3;3;	GO:0035770;GO:0030529;GO:0048471;GO:0043232;GO:0044464;GO:0043229;GO:0005622;GO:0044444;GO:0005737;GO:1990904;GO:0005623;GO:0043228;GO:0036464;GO:0044424;GO:0043226;GO:0032991;GO:0000932;GO:0005575;	ribonucleoprotein granule;intracellular ribonucleoprotein complex;perinuclear region of cytoplasm;intracellular non-membrane-bounded organelle;cell part;intracellular organelle;intracellular;cytoplasmic part;cytoplasm;ribonucleoprotein complex;cell;non-membrane-bounded organelle;cytoplasmic ribonucleoprotein granule;intracellular part;organelle;macromolecular complex;cytoplasmic mRNA processing b…	5;4;5;4;2;3;3;4;4;3;2;3;5;3;2;2;6;1;	GO:1901363;GO:0050072;GO:0016818;GO:0016817;GO:0003674;GO:0005488;GO:0003676;GO:0016787;GO:0000339;GO:0003824;GO:0097159;GO:0098772;GO:0016462;GO:0046983;GO:0046982;GO:0044692;GO:0042802;GO:0042803;GO:0003723;GO:0005515;GO:0000340;GO:0008047;GO:0030234;	heterocyclic compound binding;m7G(5')pppN diphosphatase activity;hydrolase activity, acting on acid anhydrides, in phosphorus-containing anhydrides;hydrolase activity, acting on acid anhydrides;molecular_function;binding;nucleic acid binding;hydrolase activity;RNA cap binding;catalytic activity;organic cyclic compound binding;molecular function regulator;pyrophosphatase activity;protein dimerizat…	3;7;5;4;1;2;4;3;6;2;3;2;6;4;5;5;4;5;5;3;7;4;3;	K12584	map03018;	RNA degradation;	IPR011145;IPR008594;IPR011146;	Scavenger mRNA decapping enzyme, N-terminal;Scavenger mRNA decapping enzyme DcpS/DCS2;HIT-like domain;	cytosol	SPBP4H10.20	210	S	[S] Function unknown;
T5ADL3	C-1-tetrahydrofolate synthase OS=Ophiocordyceps sinensis (strain Co18 / CGMCC 3.14243) OX=911162 GN=OCS_03776 PE=3 SV=1	0.888	1.004	1.028	0.974	2.581	1.614	1.732	1.141	0.649	0.808	0.652	0.95	1.81511	0.0389314	1.27297	0.0371685	2.31056	0.0174723	GO:0051188;GO:0009165;GO:0044281;GO:0044283;GO:1901362;GO:1901360;GO:0044710;GO:0044711;GO:0042440;GO:0043650;GO:0006767;GO:0006766;GO:0006760;GO:0000097;GO:0000096;GO:0043436;GO:0046483;GO:0043648;GO:1901564;GO:0006575;GO:1901566;GO:0016053;GO:0006163;GO:0006164;GO:0019438;GO:0042398;GO:0006807;GO:0009066;GO:0046653;GO:0046655;GO:0046654;GO:0046656;GO:1901576;GO:0051186;GO:0035999;GO:0042558;GO:…	cofactor biosynthetic process;nucleotide biosynthetic process;small molecule metabolic process;small molecule biosynthetic process;organic cyclic compound biosynthetic process;organic cyclic compound metabolic process;single-organism metabolic process;single-organism biosynthetic process;pigment metabolic process;dicarboxylic acid biosynthetic process;water-soluble vitamin metabolic process;vitam…	5;6;4;5;5;4;3;4;4;7;6;5;5;6;5;5;4;7;4;4;5;5;6;7;5;5;3;6;6;6;7;6;4;4;5;5;6;4;5;1;2;5;5;5;5;5;6;5;6;5;6;5;4;4;4;8;2;4;6;7;5;6;2;4;4;6;4;5;5;5;7;7;6;6;5;5;6;6;4;3;5;6;5;3;4;3;3;6;3;5;4;4;6;	GO:0005829;GO:0044424;GO:0044444;GO:0005737;GO:0044464;GO:0005623;GO:0005622;GO:0005575;	cytosol;intracellular part;cytoplasmic part;cytoplasm;cell part;cell;intracellular;cellular_component;	5;3;4;4;2;2;3;1;	GO:1901363;GO:0000166;GO:0035639;GO:0017076;GO:0097367;GO:0016814;GO:0016810;GO:0003674;GO:0003676;GO:0003677;GO:1901265;GO:0019238;GO:0032549;GO:0005524;GO:0016787;GO:0003824;GO:0016879;GO:0097159;GO:0032559;GO:0032555;GO:0032553;GO:0016491;GO:0004329;GO:0036094;GO:0043167;GO:0003697;GO:0030554;GO:0032550;GO:0005488;GO:0001883;GO:0001882;GO:0016646;GO:0016645;GO:0004488;GO:0016874;GO:0004477;GO:…	heterocyclic compound binding;nucleotide binding;purine ribonucleoside triphosphate binding;purine nucleotide binding;carbohydrate derivative binding;hydrolase activity, acting on carbon-nitrogen (but not peptide) bonds, in cyclic amidines;hydrolase activity, acting on carbon-nitrogen (but not peptide) bonds;molecular_function;nucleic acid binding;DNA binding;nucleoside phosphate binding;cyclohyd…	3;4;5;5;3;5;4;1;4;5;4;6;5;6;3;2;4;3;6;5;4;3;5;3;3;6;6;6;2;5;4;5;4;6;3;7;4;	K00288	map00670;map01100;	One carbon pool by folate;Metabolic pathways;	IPR000559;IPR020867;IPR027417;IPR000672;IPR020628;IPR020631;IPR020630;IPR016040;	Formate-tetrahydrofolate ligase, FTHFS;Tetrahydrofolate dehydrogenase/cyclohydrolase, conserved site;P-loop containing nucleoside triphosphate hydrolase;Tetrahydrofolate dehydrogenase/cyclohydrolase;Formate-tetrahydrofolate ligase, FTHFS, conserved site;Tetrahydrofolate dehydrogenase/cyclohydrolase, NAD(P)-binding domain;Tetrahydrofolate dehydrogenase/cyclohydrolase, catalytic domain;NAD(P)-bindi…	mitochondria	SPBC839.16	1172	H	[H] Coenzyme transport and metabolism;
